# Supplementary material
Source: MDPI journal article supplement (https://www.mdpi.com/2071-1050/14/9/4895)
Supplement: s1 [file s1]

Archive with 3 entries (3 files):
- Table S1-Sustainability.pdf
- Table S2-Sustainability.pdf
- Table S3-Sustainability.pdf
