# Supplementary material
Source: MDPI journal article supplement (https://www.mdpi.com/2071-1050/14/9/4895)
Supplement: s1 [file s1]

---

**Table S1.** Procedure followed in merging both Scopus and Web of Science (WoS) databases

---

The merging procedure was done in two stages

### Stage 1

Eligible studies in Scopus were exported in BibTeX format while that of the WoS was done in Plain text and BibTeX formats. In R studio, the bibliometric R package was activated and biblioshiny function was utilized. In biblioshiny, the BibTeX file from Scopus was imported and checked and exported in excel format. The same process was repeated for the Plain text file from WoS.

The exported files were saved in the same folder containing the BibTeX and the Plain text files. This was done to place the files in the same working directory. The biblioshiny was then closed and returned to the bibliometric R package. The “install.packages (“xlsx”)” was activated. This package was activated to help the importation of the excel files from Scopus and WoS (from biblioshiny) into the bibliometric R package.

In this regard, the two exported excel files were individually imported into the bibliometric R package. Over here, the two databases were merged, and duplicates checked. The procedure undertaken in the first stage helped in the creation of a merged Scopus and WoS file that was used in the biblioshiny for further analysis including the main information about the collection, the annual scientific production, most relevant sources, relevant authors, top authors’ production over time, country scientific production among other.

---

### Stage 2

In second stage, the BibTeX files from both Scopus and WoS were imported into the bibliometric R package following the working directory. Both files (BibTeX files) were individually converted into a bibliographic dataframe. The number of duplicate studies were again checked under this procedure. After converting each file into a bibliographic dataframe, both files were merged. After this, the “install.packages (“csv”)” and the “library (“csv”)” were activated. Finally, a merged .CSV file was created. The merged .CSV was used as the source file for the analysis that was performed in the VOSviewer software.

---
