# Supplementary material
Source: MDPI journal article supplement (https://www.mdpi.com/2071-1050/14/9/4895)
Supplement: s1 [file s1]

**Table S2.** List of all the studies used for the analysis carried out in the present work (1578 studies). Note: NA (Not Applicable) shows studies that did not include keywords and doi. Na N. also indicates Not available authors.

| Code | Authors                             | Year | Document title                                                                           | Keywords | Total citation | Source                                                   | Doi                                          |
|------|-------------------------------------|------|------------------------------------------------------------------------------------------|----------|----------------|----------------------------------------------------------|----------------------------------------------|
| 1430 | El-Ashry M; Wanless H               | 1968 | Photo interpretation of shoreline changes between Capes Hatteras and Fear North Carolina | NA       | 16             | Marine Geology                                           | 10.1016/0025-3227(68)90001-7                 |
| 1429 | Herbich J; Hales Z                  | 1971 | Remote sensing techniques used in determining changes in coast-lines                     | NA       | 1              | Proceedings of The Annual offshore Technology Conference | 10.4043/1448-ms                              |
| 1428 | Partheniades E; Purpura J           | 1972 | Coastline changes near a tidal inlet                                                     | NA       | 3              | Proc. 13th Coastal Engng. Conf. (Vancouver)              | NA                                           |
| 1425 | Gatto L                             | 1978 | Shoreline changes along the outer shore of cape cod from long point to Monomoy point     | NA       | 0              | Crrel Rep                                                | NA                                           |
| 1426 | Hayden B; Dolan R; Felder W         | 1978 | Spatial and temporal analyses of shoreline variations                                    | NA       | 13             | Coastal Engineering                                      | 10.1016/0378-3839(78)90031-5                 |
| 1427 | Dolan R; Hayden B; Heywood J        | 1978 | Analysis of coastal erosion and storm surge hazards                                      | NA       | 14             | Coastal Engineering                                      | 10.1016/0378-3839(78)90004-2                 |
| 1424 | Leatherman S                        | 1979 | Migration of assateague island maryland by inlet and overwash processes                  | NA       | 109            | Geology                                                  | 10.1130/0091-7613(1979)7<104:MOAIMB>2.0.CO;2 |
| 1453 | Dolan R; Hayden B; Rea C; Heywood J | 1979 | Shoreline erosion rates along the middle atlantic coast of the United States             | NA       | 37             | Geology                                                  | 10.1130/0091-7613(1979)7<602:SERATM>2.0.CO;2 |

|      |                                 |      |                                                                                                                       |    |     |                                                                                                                         |                              |
|------|---------------------------------|------|-----------------------------------------------------------------------------------------------------------------------|----|-----|-------------------------------------------------------------------------------------------------------------------------|------------------------------|
| 1454 | Krabill W                       | 1979 | Application of the airborne oceanographic Lidar to shoreline mapping                                                  | NA | 2   | Proceedings American Congress on Surveying and Mapping, 39th Annual Meeting, March 18 - March 24, 1979, Washington D.C. | NA                           |
| 1423 | Dolan R; Hayden B; May P; May S | 1980 | Reliability of shoreline change measurements from aerial photographs                                                  | NA | 170 | Shore and Beach                                                                                                         | NA                           |
| 1452 | Everts C; Wilson D              | 1981 | Base map analysis of coastal changes using aerial photography shoreline change                                        | NA | 0   | U.S. Army Coastal Engineering Research Center, Technical Paper                                                          | NA                           |
| 1451 | Aubrey D; Goud M                | 1983 | Coastal sediment transport popponeset beach ma                                                                        | NA | 0   |                                                                                                                         | 10.1575/1912/6924            |
| 1450 | Jantunen H; Raitala J           | 1984 | Locating shoreline changes in the porttipahta Finland water reservoir by using multitemporal Landsat data             | NA | 12  | Photogrammetria                                                                                                         | 10.1016/0031-8663(84)90009-7 |
| 1418 | Garrow H                        | 1985 | Quantification of shoreline rhythmicity                                                                               | NA | 0   | In: Proc. Int. Nineteenth Coastal Engineering Conf. (Houston, U.S.A.: Sep. 3-7, 1984), B.L. Edge (Ed.)                  | NA                           |
| 1419 | Prabhakara R P; Natr M; Raju D  | 1985 | Assessment of the role of remote sensing techniques in monitoring shoreline changes: a case study of the Kerala coast | NA | 21  | International Journal of Remote Sensing                                                                                 | 10.1080/01431168508948477    |

|      |                               |      |                                                                                                                              |    |    |                                                                            |                                |
|------|-------------------------------|------|------------------------------------------------------------------------------------------------------------------------------|----|----|----------------------------------------------------------------------------|--------------------------------|
| 1420 | Nayak S; Sahai B              | 1985 | Coastal morphology: a case study of the Gulf of khambhat Cambay                                                              | NA | 40 | International Journal of Remote Sensing                                    | 10.1080/01431168508948478      |
| 1421 | Kana T; Williams M; Stevens D | 1985 | Managing shoreline changes in the presence of nearshore shoal migration and attachment                                       | NA | 13 | Coastal Zone: Proceedings of The Symposium on Coastal and Ocean Management | NA                             |
| 1449 | Na N                          | 1985 | Aerial photography applications in the study of coastal erosion and pollution 1974 may 1985 citations from oceanic abstracts | NA | 0  | Na                                                                         | NA                             |
| 1447 | Na N                          | 1986 | Aerial photography applications in the study of coastal erosion and pollution 1974 May 1986 citations from oceanic abstracts | NA | 0  | Na                                                                         | NA                             |
| 1448 | Na N                          | 1986 | Coast of California storm and tidal waves study southern California coastal photography and beach profile index              | NA | 0  | Na                                                                         | NA                             |
| 1417 | Mikhaylov V; Gubin V          | 1988 | Mapping the dynamics of landscapes near Belorussian reservoirs from remote sensing imagery                                   | NA | 0  | Mapping Sciences and Remote Sensing                                        | 10.1080/07493878.1988.10641700 |
| 1446 | Frihy O                       | 1988 | Nile delta shoreline changes aerial photographic study of a 28year period                                                    | NA | 60 | Journal of Coastal Research                                                | NA                             |
| 1413 | Luu D                         | 1989 | Shoreline changes in Vietnam using remote sensing techniques                                                                 | NA | 0  | Digest - International Geoscience and Remote Sensing Symposium (IGARSS)    | NA                             |

|      |                                                                                          |      |                                                                                                                                                      |                                          |     |                                                                            |                                |
|------|------------------------------------------------------------------------------------------|------|------------------------------------------------------------------------------------------------------------------------------------------------------|------------------------------------------|-----|----------------------------------------------------------------------------|--------------------------------|
| 1414 | Foster E; Savage R                                                                       | 1989 | Methods of historical shoreline analysis                                                                                                             | NA                                       | 13  | Coastal Zone: Proceedings of The Symposium on Coastal and Ocean Management | NA                             |
| 1415 | Nuriddinov O                                                                             | 1989 | Use of remote sensing in the study of the changing shoreline of Sarykamysk lake                                                                      | NA                                       | 1   | Mapping Sciences and Remote Sensing                                        | 10.1080/07493878.1989.10641746 |
| 1416 | Eliot I; Clarke D                                                                        | 1989 | Temporal and spatial bias in the estimation of shoreline rate of change statistics from beach survey information                                     | Australia; Erosion; Shoreland Management | 31  | Coastal Management                                                         | 10.1080/08920758909362081      |
| 1445 | Quellenec R                                                                              | 1989 | The Corine coastal erosion project identification of coastal erosion problems and data base on the littoral environment of eleven European countries | NA                                       | 0   | Na                                                                         | NA                             |
| 1412 | Blodget H; Taylor P; Roark J                                                             | 1990 | Landsat MSS monitoring of Nile delta shoreline changes                                                                                               | NA                                       | 0   | Digest - International Geoscience and Remote Sensing Symposium (IGARSS)    | NA                             |
| 1444 | Smith G; Zarillo G                                                                       | 1990 | Calculating long term shoreline recession rates using aerial photographic and beach profiling techniques                                             | NA                                       | 102 | Journal of Coastal Research                                                | NA                             |
| 1406 | Blodget H; Taylor P; Roark J                                                             | 1991 | Shoreline changes along the Rosetta-Nile Promontory: monitoring with satellite observations                                                          | NA                                       | 69  | Marine Geology                                                             | 10.1016/0025-3227(91)90083-G   |
| 1407 | Mcbride R; Hiland M; Penland S; Williams S; Byrnes M; Westphal K; Jaffe B; Sallenger J A | 1991 | Mapping barrier island changes in Louisiana techniques accuracy and results                                                                          | NA                                       | 20  | Coastal Sediments '91                                                      | NA                             |
| 1408 | Demirpolat S; Tanner W                                                                   | 1991 | Keys to high accuracy mapping of shoreline changes                                                                                                   | NA                                       | 3   | Coastal Sediments '91                                                      | NA                             |

|      |                                                           |      |                                                                                                                  |                                                                           |     |                                                                                                                       |                              |
|------|-----------------------------------------------------------|------|------------------------------------------------------------------------------------------------------------------|---------------------------------------------------------------------------|-----|-----------------------------------------------------------------------------------------------------------------------|------------------------------|
| 1409 | Morton R                                                  | 1991 | Accurate shoreline mapping past, present and future                                                              | NA                                                                        | 62  | Coastal Sediments '91                                                                                                 | NA                           |
| 1410 | Byrnes M; McBride R; Highland M                           | 1991 | Accuracy standards and development of a national shoreline change data base                                      | NA                                                                        | 18  | Coastal Sediments '91                                                                                                 | NA                           |
| 1411 | Rosenfeld C; Peterson C; Pettit D; Jackson P; Kimerling A | 1991 | Littoral cell information system for the Pacific northwest USA                                                   | NA                                                                        | 2   | Coastal Sediments '91; Volume 2                                                                                       | NA                           |
| 1442 | Na N                                                      | 1991 | Technical papers ACSMASPRS annual convention Baltimore 1991 volume 5 photogrammetry and primary data acquisition | NA                                                                        | 0   | Technical Papers ACSM-ASPRS Annual Convention, Baltimore, 1991. Volume 5: Photogrammetry and Primary Data Acquisition | NA                           |
| 1443 | Lo C; Rogers R                                            | 1991 | Quantitative shoreline change determination using a micro-computer based analytical photogrammetric approach     | NA                                                                        | 0   | Technical Papers ACSM-ASPRS Annual Convention, Baltimore, 1991. Vol. 5: Photogrammetry and Primary Data Acquisition   | NA                           |
| 2208 | Blodget H; Taylor P; Roark J                              | 1991 | Shoreline changes along the Rosetta Nile Promontory monitoring with satellite observations                       | NA                                                                        | 60  | Marine Geology                                                                                                        | 10.1016/0025-3227(91)90083-G |
| 2209 | Crowell M; Leatherman S; Buckley M                        | 1991 | Historical shoreline change error analysis and mapping accuracy                                                  | Erosion Mapping; Historical Shoreline Change; Map Accuracy; Erosion Rates | 300 | Journal of Coastal Research                                                                                           | NA                           |
| 1405 | Hershner C; Posenau J; Smithson J; Kimball S              | 1992 | High resolution shoreline mapping in estuarine environments                                                      | NA                                                                        | 0   | Proceedings of Spie - The International Society For Optical Engineering                                               | NA                           |

|      |                                       |      |                                                                                                                                                        |                                                        |     |                                                                            |                           |
|------|---------------------------------------|------|--------------------------------------------------------------------------------------------------------------------------------------------------------|--------------------------------------------------------|-----|----------------------------------------------------------------------------|---------------------------|
| 1441 | Shoshany M; Degani A                  | 1992 | Shoreline detection by digital image processing of aerial photography                                                                                  | NA                                                     | 51  | Journal of Coastal Research                                                | NA                        |
| 2207 | Shoshany M; Degani A                  | 1992 | Shoreline detection by digital image processing of aerial photography                                                                                  | Aerial Photography; Image Processing; Shoreline Change | 33  | Journal of Coastal Research                                                | NA                        |
| 1403 | Madalon J L; Kendall T                | 1993 | Dependence of shoreline change on channel dredge material disposal practices Humboldt Bay, ca: a case study                                            | NA                                                     | 2   | Coastal Zone: Proceedings of The Symposium on Coastal and Ocean Management | NA                        |
| 1404 | Crowell M; Buckley M                  | 1993 | Calculating erosion rates using long term data to increase data confidence                                                                             | NA                                                     | 5   | Coastal Zone: Proceedings of The Symposium on Coastal and Ocean Management | NA                        |
| 1439 | Morton R; Leach M; Paine J; Cardoza M | 1993 | Monitoring beach changes using GPS-surveying techniques                                                                                                | NA                                                     | 116 | Journal of Coastal Research                                                | NA                        |
| 1440 | Fenster M; Dolan R                    | 1993 | Historical shoreline trends along the outer banks North Carolina processes and responses                                                               | NA                                                     | 32  | Journal of Coastal Research                                                | NA                        |
| 1402 | Frihy O; Nasr S; El H M; El R M       | 1994 | Remote sensing of beach erosion along the Rosetta promontary northwestern Nile delta Egypt                                                             | NA                                                     | 53  | International Journal of Remote Sensing                                    | 10.1080/01431169408954197 |
| 1436 | Thieler E; Danforth W                 | 1994 | Historical shoreline mapping i improving techniques and reducing positioning errors                                                                    | NA                                                     | 177 | Journal of Coastal Research                                                | NA                        |
| 1437 | Thieler E; Danforth W                 | 1994 | Historical shoreline mapping ii application of the digital shoreline mapping and analysis systems DSMS/DSAS to shoreline change mapping in Puerto Rico | NA                                                     | 108 | Journal of Coastal Research                                                | NA                        |
| 1438 | Johnston C; Sales J                   | 1994 | Using GIS to predict erosion hazard along lake superior                                                                                                | NA                                                     | 2   | Urisa Journal                                                              | NA                        |

|      |                                                                       |      |                                                                                                                                                                         |                                                                                                                                   |     |                                                                               |                                      |
|------|-----------------------------------------------------------------------|------|-------------------------------------------------------------------------------------------------------------------------------------------------------------------------|-----------------------------------------------------------------------------------------------------------------------------------|-----|-------------------------------------------------------------------------------|--------------------------------------|
| 2205 | Thieler E; Danforth W                                                 | 1994 | Historical shoreline mapping i<br>improving techniques and re-<br>ducing positioning errors                                                                             | Aerial Photography;<br>Cartography; Coastal<br>Erosion; Photogram-<br>metry; Shoreline<br>Change                                  | 156 | Journal of Coastal<br>Research                                                | NA                                   |
| 2206 | Thieler E; Danforth W                                                 | 1994 | Historical shoreline mapping ii<br>application of the digital shore-<br>line mapping and analysis sys-<br>tems DSMS/ DSAS to shoreline<br>change mapping in Puerto Rico | Aerial Photography;<br>Cartography; Coastal<br>Erosion; Geographic<br>Information Systems;<br>Photogrammetry;<br>Shoreline Change | 91  | Journal of Coastal<br>Research                                                | NA                                   |
| 1400 | Fisher J; Overton M                                                   | 1995 | Interpretation of shoreline posi-<br>tion from aerial photographs                                                                                                       | NA                                                                                                                                | 15  | Proceedings of The<br>Coastal Engineer-<br>ing Conference                     | 10.1061/9780784400890.145            |
| 1401 | Chen A; Chen C; Chen K                                                | 1995 | Investigation of shoreline change<br>and migration along<br>Waisandingzou barrier island<br>central western Taiwan                                                      | NA                                                                                                                                | 3   | International Geo-<br>science and Re-<br>mote Sensing Sym-<br>posium (IGARSS) | NA                                   |
| 1433 | Thieler E; Rodriguez R;<br>Carlo M                                    | 1995 | Beach erosion and coastal<br>development at rincon Puerto<br>Rico                                                                                                       | NA                                                                                                                                | 5   | Shore & Beach                                                                 | NA                                   |
| 1434 | Williams J R; Ferrigno J;<br>Swithinbank C; Lucchitta<br>B; Seekins B | 1995 | Coastal change and glaciological<br>maps of Antarctica                                                                                                                  | NA                                                                                                                                | 25  | Annals of<br>Glaciology                                                       | 10.3189/s0260305500015950            |
| 1435 | Uda T; Yoshida T;<br>Nishijima T; Fujikawa Y                          | 1995 | Beach changes around former<br>river mouths associated with the<br>construction of a flood way of<br>the Yasu river in lake biwa                                        | NA                                                                                                                                | 0   | Transactions -<br>Japanese<br>Geomorphological<br>Union                       | NA                                   |
| 1398 | Shoshany M; Golik A;<br>Degani A; Lavee H;<br>Gvirtzman G             | 1996 | New evidence for sand transport<br>direction along the coastline of<br>Israel                                                                                           | Aerial Photography;<br>Coastline Change;<br>Image Processing                                                                      | 28  | Journal of Coastal<br>Research                                                | NA                                   |
| 1399 | Daniels R; Daniels R                                                  | 1996 | An innovative method of model<br>integration to forecast spatial<br>patterns of shoreline change: A<br>case study of Nags head North<br>Carolina                        | Climate Change;<br>Coastal Zone<br>Management; Model<br>Integration; Sea<br>Level Rise; Shoreline<br>Mapping                      | 4   | Professional<br>Geographer                                                    | 10.1111/j.0033-<br>0124.1996.00195.x |

|      |                                                     |      |                                                                                                                                                             |                                                                                                                                                                                        |    |                                                                                                                                                                                              |    |
|------|-----------------------------------------------------|------|-------------------------------------------------------------------------------------------------------------------------------------------------------------|----------------------------------------------------------------------------------------------------------------------------------------------------------------------------------------|----|----------------------------------------------------------------------------------------------------------------------------------------------------------------------------------------------|----|
| 2216 | Wemmelmann E;<br>Wiegardt S                         | 1996 | A system for monitoring<br>shoreline change with GIS<br>sunken meadow spit Wellfleet<br>Bay wildlife sanctuary Cape Cod<br>Massachusetts                    | NA                                                                                                                                                                                     | 0  | Proceedings of The<br>Thirtieth Meeting<br>of The Geoscience<br>Information<br>Society: Crossing<br>The Bridge to The<br>Future: Managing<br>Geoscience<br>Information In The<br>Next Decade | NA |
| 1393 | Davidson M; Huntley D;<br>Holman R; George K        | 1997 | Evaluation of large-scale km<br>intertidal beach morphology on<br>a macrotidal beach using video<br>images                                                  | NA                                                                                                                                                                                     | 33 | Coastal Dynamics -<br>Proceedings of The<br>International<br>Conference                                                                                                                      | NA |
| 1394 | Kaminsky G; Ruggiero P;<br>Gelfenbaum G; Peterson C | 1997 | Long term coastal evolution and<br>regional dynamics of a us Pacific<br>northwest littoral cell                                                             | NA                                                                                                                                                                                     | 10 | Coastal Dynamics -<br>Proceedings of The<br>International<br>Conference                                                                                                                      | NA |
| 1395 | Jiménez J; Sánchez-Arcilla<br>A; Bou J; Ortiz M     | 1997 | Analysing short term shoreline<br>changes along the ebro delta<br>Spain using aerial photographs                                                            | Aerial Photography;<br>Coastal Erosion;<br>Ebro Delta;<br>Shoreline Changes                                                                                                            | 48 | Journal of Coastal<br>Research                                                                                                                                                               | NA |
| 1396 | Mcbride R; Byrnes M                                 | 1997 | Regional variations in shore<br>response along barrier island<br>systems of the Mississippi river<br>delta plain historical change and<br>future prediction | Barrier Island<br>Evolution; Barrier<br>Shorelines; Coastal<br>Erosion; Coastal<br>Restoration;<br>Geomorphic<br>Response; Gulf of<br>Mexico; Louisiana;<br>Mississippi River<br>Delta | 50 | Journal of Coastal<br>Research                                                                                                                                                               | NA |



|      |                                                               |      |                                                                                                                                                   |                                                                                                                                                      |     |                                                                         |                           |
|------|---------------------------------------------------------------|------|---------------------------------------------------------------------------------------------------------------------------------------------------|------------------------------------------------------------------------------------------------------------------------------------------------------|-----|-------------------------------------------------------------------------|---------------------------|
| 1397 | Overton M; Fisher J                                           | 1997 | Shoreline analysis using digital photogrammetry                                                                                                   | NA                                                                                                                                                   | 9   | Proceedings of The Coastal Engineering Conference                       | 10.1061/9780784402429.289 |
| 1384 | Martinez-Benjamin J; Medeiros C; Chic O; Bezerra M; Redondo J | 1998 | Incidence of SAR images on the study of ne Brazilian coast and shelf waters                                                                       | Coastal Dynamics and Morphology; Remote Sensing; SAR Images                                                                                          | 1   | Proceedings of Spie - The International Society For Optical Engineering | 10.1117/12.332726         |
| 1385 | Allison M                                                     | 1998 | Historical changes in the gangesbrahmaputra delta front                                                                                           | Bangladesh; Coastal Subsidence; Deltaic Sedimentation; Ganges-Brahmaputra Delta; India; Shoreline Change                                             | 135 | Journal of Coastal Research                                             | NA                        |
| 1386 | Gorman L; Morang A; Larson R                                  | 1998 | Monitoring the coastal environment part IV mapping shoreline changes and bathymetric analysis                                                     | Bathymetric Mapping; Cartographic Software; Depth of Closure; Geospatial Methods; Grid Models; Shoreline Change; Triangular Irregular Network Models | 78  | Journal of Coastal Research                                             | NA                        |
| 1387 | Shao G; Young D; Porter J; Hayden B                           | 1998 | An integration of remote sensing and GIS to examine the responses of shrub thicket distributions to shoreline changes on Virginia barrier islands | Landscape Dynamics; Modelling; Spatial Change; Virginia Coast Reserve                                                                                | 18  | Journal of Coastal Research                                             | NA                        |
| 1388 | Sreekala S; Baba M; Muralikrishna M                           | 1998 | Shoreline changes of Kerala coast using irs data and aerial photographs                                                                           | NA                                                                                                                                                   | 14  | Indian Journal of Marine Sciences                                       | NA                        |
| 1389 | Sanderson P; Eliot L; Fuller M                                | 1998 | Historical development of a foredune plain at desperate Bay western Australia                                                                     | Beach Ridges; Coastal Accretion; Shoreline Movement; Tombolo                                                                                         | 13  | Journal of Coastal Research                                             | NA                        |
| 1390 | Chen L; Rau J                                                 | 1998 | Detection of shoreline changes for tideland areas using multitemporal satellite images                                                            | NA                                                                                                                                                   | 120 | International Journal of Remote Sensing                                 | 10.1080/014311698214055   |

|      |                                                                  |      |                                                                                                                                            |                                                                                                    |     |                                                                                               |                                |
|------|------------------------------------------------------------------|------|--------------------------------------------------------------------------------------------------------------------------------------------|----------------------------------------------------------------------------------------------------|-----|-----------------------------------------------------------------------------------------------|--------------------------------|
| 1391 | Frihy O; Dewidar K; Nasr S; El R M                               | 1998 | Change detection of the northeastern Nile delta of Egypt shoreline changes spit evolution margin changes of Manzala lagoon and its islands | NA                                                                                                 | 60  | International Journal of Remote Sensing                                                       | 10.1080/014311698215054        |
| 1392 | Ferrigno J; Williams J R; Rosanova C; Lucchitta B; Swithinbank C | 1998 | Analysis of coastal change in Marie Byrd land and Ellsworth land west Antarctica using Landsat imagery                                     | NA                                                                                                 | 24  | Annals of Glaciology                                                                          | 10.3189/1998aog27-1-33-40      |
| 1381 | Cetin H; Yilmaz B; Demirkol C                                    | 1999 | Engineering and environmental effects of coastline changes in Turkey northeastern Mediterranean                                            | Coastline Change; Dams; Engineering Geology; Environmental Geology; Paleogeography; Remote Sensing | 17  | Environmental and Engineering Geoscience                                                      | 10.2113/gseegeosci.v.3.315     |
| 1382 | Williams H                                                       | 1999 | Sandspit erosion following interruption of longshore sediment transport shamrock island Texas                                              | Aerial Photographs; Erosion; GIS; Longshore Sediment Transport; Sand Spit                          | 1   | Environmental Geology                                                                         | 10.1007/s002540050372          |
| 1383 | Barbosa M; Singhroy V; Saint-Jean R                              | 1999 | Mapping coastal erosion in southern Paraiba Brazil from Radarsat-1                                                                         | NA                                                                                                 | 10  | Canadian Journal of Remote Sensing                                                            | 10.1080/07038992.1999.10874730 |
| 2194 | Foote M; Horn D                                                  | 1999 | Swash zone velocity and volumetric measurement using a simple video technique                                                              | NA                                                                                                 | 0   | Coastal Sediments '99, Vols 1-3                                                               | NA                             |
| 1374 | Leatherman S                                                     | 2000 | Beach erosion studies on tropical islands                                                                                                  | Beach Erosion; Islands; Tropical Regions                                                           | 0   | Proceedings of 1st International Symposium on Carbonate Sand Beaches - Carbonate Beaches 2000 | 10.1061/40640(305)18           |
| 1376 | Moore L                                                          | 2000 | Shoreline mapping techniques                                                                                                               | Aerial Photography; Cartography; Coastal Mapping; Erosion Rates; Photogrammetry; Shoreline Change  | 374 | Journal of Coastal Research                                                                   | NA                             |

|      |                                                   |      |                                                                                                                         |                                                                                                            |    |                                                                                                                |                                  |
|------|---------------------------------------------------|------|-------------------------------------------------------------------------------------------------------------------------|------------------------------------------------------------------------------------------------------------|----|----------------------------------------------------------------------------------------------------------------|----------------------------------|
| 1377 | Trigo-Teixeira A; Matos J; Pimentel C; Pinheiro J | 2000 | A map of land at risk on the Portuguese coast                                                                           | NA                                                                                                         | 2  | Periodicum Biologorum                                                                                          | NA                               |
| 1378 | Marghany M; Hobma T                               | 2000 | Operationalization of SAR polarized data for assessment of coastal erosion                                              | Canny Algorithm; Coastal Erosion; Operationalization; Polarised SAR Data                                   | 0  | International Archives of The Photogrammetry, Remote Sensing and Spatial Information Sciences - ISPRS Archives | NA                               |
| 1379 | Gangadhara B H; Subrahmanya K                     | 2000 | Shoreline changes and evolution of the coastal zone in southern Karnataka India an analysis based on multitemporal data | Coastal Zone; Erosion; Multi-Spectral Data; Multi-Temporal; Remote Sensing                                 | 6  | International Archives of The Photogrammetry, Remote Sensing and Spatial Information Sciences - ISPRS Archives | NA                               |
| 1380 | Hapke C; Richmond B                               | 2000 | Monitoring beach morphology changes using small format aerial photography and digital softcopy photogrammetry           | Beach Evolution; Beach Morphology; Digital Terrain Models; Photogrammetry; Small Format Aerial Photography | 45 | Environmental Geosciences                                                                                      | 10.1046/j.1526-0984.2000.71001.x |
| 1366 | Kumada T; KoBayashi A; Masuda K                   | 2001 | Study on erosion process of artificial beach                                                                            | NA                                                                                                         | 0  | Proceedings of The International Conference on offshore Mechanics and Arctic Engineering - Omae                | NA                               |

|      |                                             |      |                                                                                                                                               |                                                                                                                 |    |                                                                                   |                        |
|------|---------------------------------------------|------|-----------------------------------------------------------------------------------------------------------------------------------------------|-----------------------------------------------------------------------------------------------------------------|----|-----------------------------------------------------------------------------------|------------------------|
| 1367 | Vidal S; Graham D; Sault M                  | 2001 | Detecting shoreline feature change within ports using high resolution satellite imagery<br>noaa's coast and shoreline change analysis program | NA                                                                                                              | 0  | Earth System Monitor                                                              | NA                     |
| 1368 | Bo G; Dellepiane S; De L R                  | 2001 | Coastline extraction in remotely sensed images by means of texture features analysis                                                          | Coastal Monitoring;<br>Fuzzy Logic;<br>Shoreline Detection;<br>Spatial Contextual Information; Texture Features | 10 | International Geoscience and Remote Sensing Symposium (IGARSS)                    | NA                     |
| 1369 | Asano T; Khono J; Komaguchi T; Sato T       | 2001 | Analysis on typhoon induced shoreline changes using remote sensed images                                                                      | NA                                                                                                              | 1  | Proceedings of The International Symposium on Ocean Wave Measurement and Analysis | NA                     |
| 1370 | Hartman J                                   | 2001 | Combination of technologies improves coastal erosion measurements                                                                             | NA                                                                                                              | 0  | Civil Engineering                                                                 | NA                     |
| 1371 | Li R; Liu J; Felus Y                        | 2001 | Spatial modeling and analysis for shoreline change detection and coastal erosion monitoring                                                   | Change Detection;<br>Coastal GIS; Erosion; Shoreline Mapping                                                    | 58 | Marine Geodesy                                                                    | 10.1080/01490410121502 |
| 1372 | Bo G; Dellepiane S; Giorgini F; Bartolini M | 2001 | A detail preserving solution to the problem of shoreline detection in remotely sensed images                                                  | Coastal Management;<br>Connectivity Map;<br>Image Analysis;<br>Shoreline Detection;<br>Texture Analysis         | 0  | Proceedings of Spie - The International Society For Optical Engineering           | 10.1117/12.413910      |
| 1373 | Li H; Yang G                                | 2001 | The spatial analysis of erosion and deposition of tidal flat by GIS                                                                           | Dem; Erosion and Deposition; GIS; Spatial Analysis; Tidal-Flat                                                  | 0  | Dili Xuebao/Acta Geographica Sinica                                               | NA                     |
| 1349 | Skilodimou H; Stefouli M; Bathrellos G      | 2002 | Spatiotemporal analysis of the coastline of Faliro Bay Attica Greece                                                                          | Aerial Photographs;<br>Coastline Changes;<br>G.I.S.; Greece;<br>Satellite Imagery;<br>Topographical Maps        | 10 | Estudios Geologicos                                                               | NA                     |

|      |                                             |      |                                                                                                                                                                                            |                                                                                                                          |     |                                                                       |                               |
|------|---------------------------------------------|------|--------------------------------------------------------------------------------------------------------------------------------------------------------------------------------------------|--------------------------------------------------------------------------------------------------------------------------|-----|-----------------------------------------------------------------------|-------------------------------|
| 1350 | Adams K; Minor T                            | 2002 | Historic shoreline change at lake Tahoe from 1938 to 1998 and its impact on sediment and nutrient loading                                                                                  | Lake Tahoe; Nitrogen; Nutrient Loading; Phosphorus; Shoreline Erosion                                                    | 6   | Journal of Coastal Research                                           | NA                            |
| 1351 | El-Asmar H                                  | 2002 | Short term coastal changes along Damietta port Said coast northeast of the Nile delta Egypt                                                                                                | Coastline; Damietta; Erosion; Nile Delta; Port Said; Satellite Images                                                    | 37  | Journal of Coastal Research                                           | NA                            |
| 1352 | Stockdon H; Sallenger J A; List J; Holman R | 2002 | Estimation of shoreline position and change using airborne topographic Lidar data                                                                                                          | Beach Processes; Coastal Change; Remote Sensing; Storm Impact Assessment                                                 | 263 | Journal of Coastal Research                                           | NA                            |
| 1353 | Marghany M                                  | 2002 | TopSAR wave spectra model and coastal erosion detection                                                                                                                                    | Coastal Erosion; Huygens' Principle; Quasi-Linear Transformation; Significant Wave Height; TopSAR; Wave Refraction       | 5   | International Journal of Applied Earth Observation and Geoinformation | NA                            |
| 1354 | Li R; Ma R; Di K                            | 2002 | Digital tide coordinated shoreline                                                                                                                                                         | Coastal Terrain Model; Shoreline; Tide-Coordinated Shoreline; Water Surface Model                                        | 51  | Marine Geodesy                                                        | 10.1080/014904102753516714    |
| 1355 | Moore L; Griggs G                           | 2002 | Long term cliff retreat and erosion hotspots along the central shores of the Monterey Bay national marine sanctuary                                                                        | Aerial Photography; Cliffs; Coastal Geomorphology; Digital Photogrammetry; Erosion Rates; Geologic Hazards; Monterey Bay | 88  | Marine Geology                                                        | 10.1016/S0025-3227(01)00271-7 |
| 1356 | Trépanier I; Dubois J; Bonn F               | 2002 | Study of the features of coastal evolution using remote sensing HRY and SPOT images application to the Red river delta Vietnam suivi de l'évolution du trait de côte à partir d'images hrv | NA                                                                                                                       | 7   | International Journal of Remote Sensing                               | 10.1080/01431160110070348     |

xs de spot application au delta  
du fleuve rouge vietnam

|      |                                                          |      |                                                                                                                                               |                                                                                                                              |    |                                                                                     |                                   |
|------|----------------------------------------------------------|------|-----------------------------------------------------------------------------------------------------------------------------------------------|------------------------------------------------------------------------------------------------------------------------------|----|-------------------------------------------------------------------------------------|-----------------------------------|
| 1357 | Okubo Y; Kaku M;<br>Rokugawa S; Tsu H                    | 2002 | Remote sensing survey for<br>coastal environmental change in<br>Asia                                                                          | NA                                                                                                                           | 0  | 2002 Seg Annual<br>Meeting                                                          | NA                                |
| 1359 | El-Asmar H; White K                                      | 2002 | Changes in coastal sediment<br>transport processes due to<br>construction of new Damietta<br>harbour Nile delta Egypt                         | Coastal Erosion; Nile<br>Delta; Remote<br>Sensing;<br>Sedimentology                                                          | 47 | Coastal<br>Engineering                                                              | 10.1016/S0378-3839(02)00068-<br>6 |
| 1360 | De L R; Dellepiane S; Bo G                               | 2002 | Texture features analysis for<br>coastline extraction in remotely<br>sensed images                                                            | Coastal Management;<br>Fuzzy-Connectivity<br>Map; Image<br>Analysis; Shoreline<br>Detection; Texture<br>Analysis             | 0  | Proceedings of<br>Spie - The<br>International<br>Society For Optical<br>Engineering | 10.1117/12.454164                 |
| 1361 | Revell D; Marra J                                        | 2002 | An application of Lidar to<br>multiple scales of shoreline<br>change in Oregon                                                                | NA                                                                                                                           | 0  | Solutions to<br>Coastal Disasters<br>2002                                           | 10.1061/40605(258)52              |
| 1362 | Maktav D; Sunar E F;<br>Kabdasli S                       | 2002 | Monitoring coastal erosion at the<br>Black sea coasts in Turkey using<br>satellite data a case study at the<br>lake Terkos northwest Istanbul | NA                                                                                                                           | 18 | International<br>Journal of Remote<br>Sensing                                       | 10.1080/01431160110115979         |
| 1363 | Rasmussen T; Fraser R;<br>Lemberg D; ReGIS R             | 2002 | Mapping stamp sand dynamics<br>gay Michigan                                                                                                   | Coastal<br>Geomorphology;<br>GIS; Keweenaw;<br>Lake Superior; Mill<br>Tailings; Remote<br>Sensing; Sands;<br>Sediment; Stamp | 9  | Journal of Great<br>Lakes Research                                                  | 10.1016/S0380-1330(02)70583-<br>2 |
| 1364 | Brock J; Wright C;<br>Sallenger A; Krabill W;<br>Swift R | 2002 | Basis and methods of NASA<br>airborne topographic mapper<br>Lidar surveys for coastal studies                                                 | Airborne Laser<br>Altimetry;<br>Lasermapping; Shoreline<br>Change                                                            | 99 | Journal of Coastal<br>Research                                                      | NA                                |

|      |                                           |      |                                                                                                                      |                                                                                                                                         |     |                                                                |                             |
|------|-------------------------------------------|------|----------------------------------------------------------------------------------------------------------------------|-----------------------------------------------------------------------------------------------------------------------------------------|-----|----------------------------------------------------------------|-----------------------------|
| 1365 | Pajak M; Leatherman S                     | 2002 | The high water line as shoreline indicator                                                                           | Assateague Island; Beach Erosion Rates; Duck; High Water Line; Md; Nc; Shoreline Change; Shoreline Indicators                           | 172 | Journal of Coastal Research                                    | NA                          |
| 2186 | Revell D; Komar P; Sallenger A            | 2002 | An application of Lidar to analyses of El Nino erosion in the netarts littoral cell Oregon                           | Coastal Erosion; Large-Scale Coastal Behavior; El Nino; LIDAR; Oregon                                                                   | 37  | Journal of Coastal Research                                    | NA                          |
| 1328 | Shaghude Y; Wannäs K; Lundén B            | 2003 | Assessment of shoreline changes in the western side of Zanzibar channel using satellite remote sensing               | NA                                                                                                                                      | 27  | International Journal of Remote Sensing                        | 10.1080/0143116031000102430 |
| 1329 | Giovannozzi M; Stauble D; Wise R          | 2003 | Innovative shore protection structures at Cape May point New Jersey                                                  | NA                                                                                                                                      | 1   | Coastal Structures 2003 - Proceedings of The Conference        | NA                          |
| 1330 | Marghany M                                | 2003 | Polaris AirSAR along track interferometry for shoreline change modeling                                              | NA                                                                                                                                      | 4   | International Geoscience and Remote Sensing Symposium (IGARSS) | NA                          |
| 1331 | Gibeaut J                                 | 2003 | Lidar mapping a shoreline by laser light                                                                             | NA                                                                                                                                      | 5   | Geotimes                                                       | NA                          |
| 1332 | Ruggiero P; Kaminsky G; Gelfenbaum G      | 2003 | Linking proxy based and datum based shorelines on a high energy coastline implications for shoreline change analyses | Aerial Photographs; Beach Profiles; Error Analysis; Morphodynamic Variability; Shoreline Change; T-Sheets; Washington State; Wave Runup | 60  | Journal of Coastal Research                                    | NA                          |
| 1333 | Langley S; Alexander C; Bush D; Jackson C | 2003 | Modernizing shoreline change analysis in Georgia using topographic survey sheets in a GIS environment                | Coastal Management; Erosion Rates; GIS; St. Catherines Island; T-Sheets; Wassaw Island                                                  | 26  | Journal of Coastal Research                                    | NA                          |

|      |                                                   |      |                                                                               |                                                                                                                                                                                                                                                           |     |                             |    |
|------|---------------------------------------------------|------|-------------------------------------------------------------------------------|-----------------------------------------------------------------------------------------------------------------------------------------------------------------------------------------------------------------------------------------------------------|-----|-----------------------------|----|
| 1334 | Stauble D                                         | 2003 | The use of shoreline change mapping in coastal engineering project assessment | Beach Nourishment; Coastal Engineering; Hot Spots; Inlet Adjacent Shoreline Change; Narrow-Crested Submerged BreakwaterRS; National Shoreline Management Study; National Shoreline Study 1971; Noaa/Nos-Cerc Cooperative Shoreline Movement Mapping Study | 15  | Journal of Coastal Research | NA |
| 1335 | Fletcher C; Rooney J; Barbee M; Lim S; Richmond B | 2003 | Mapping shoreline change using digital orthophotogrammetry on maui Hawaii     | Coastal Erosion; Coastal Geology; Coastal Management; Photogrammetry; Setbacks; Shoreline Change                                                                                                                                                          | 160 | Journal of Coastal Research | NA |
| 1336 | Graham D; Sault M; Bailey J                       | 2003 | National ocean service shoreline past present and future                      | High Water Line; Mean High Water Line; National Geodetic Survey; Photogrammetric Survey Mapping; Planetable; Remote Sensing; Shoreline Manuscripts; Shoreline Standards and Accuracies; Survey of The Coast                                               | 42  | Journal of Coastal Research | NA |



|      |                                                |      |                                                                                                        |                                                                                                                                                                           |    |                                                   |                             |
|------|------------------------------------------------|------|--------------------------------------------------------------------------------------------------------|---------------------------------------------------------------------------------------------------------------------------------------------------------------------------|----|---------------------------------------------------|-----------------------------|
| 1337 | Allan J; Komar P; Priest G                     | 2003 | Shoreline variability on the high energy Oregon coast and its usefulness in erosion hazard assessments | Coastal Erosion; Coastal Setbacks; El Niños; Erosion Hazard Assessment; GIS; Historical Shorelines; Hotspot Erosion; Jetties; Oregon; Storm Waves; T-Sheets; Water Levels | 34 | Journal of Coastal Research                       | NA                          |
| 1338 | Zuzek P; Nairn R; Thieme S                     | 2003 | Spatial and temporal considerations for calculating shoreline change rates in the great lakes basin    | Bluff; Dune; End Point Rate; Linear Regression; Recession                                                                                                                 | 74 | Journal of Coastal Research                       | NA                          |
| 1339 | Wozencraft J; Lillycrop W                      | 2003 | Shoals airborne coastal mapping past present and future                                                | Aerial Photography; Bathymetry; HypeRSpectral Imagery; LIDAR; Regional Sediment Management; Remote Sensing; Shoals; Shoreline Monitoring; Topography                      | 32 | Journal of Coastal Research                       | NA                          |
| 1340 | Parker B                                       | 2003 | The difficulties in measuring a consistently defined shoreline the problem of vertical referencing     | Hydrodynamic Models; Mean High Water Shoreline; Shoreline Change; Shoreline Indicators; Vertical Datum Transformation                                                     | 43 | Journal of Coastal Research                       | NA                          |
| 1341 | Moore A; Morris K; Blackwell G; Jones A; Sim P | 2003 | Using geomorphological rules to classify photogrammetrically derived digital elevation models          | NA                                                                                                                                                                        | 11 | International Journal of Remote Sensing           | 10.1080/0143116031000066891 |
| 1342 | Asano T; Komaguchi T; Khono J; Sato T          | 2003 | Monitoring on long and short term beach deformations using remote sensed images                        | NA                                                                                                                                                                        | 0  | Proceedings of The Coastal Engineering Conference | 10.1142/9789812791306_0155  |

|      |                                                            |      |                                                                                                                                                                                                                                              |                                                                                       |    |                                                                                             |                                 |
|------|------------------------------------------------------------|------|----------------------------------------------------------------------------------------------------------------------------------------------------------------------------------------------------------------------------------------------|---------------------------------------------------------------------------------------|----|---------------------------------------------------------------------------------------------|---------------------------------|
| 1343 | Lippmann T; List J;<br>Kannan S                            | 2003 | Shoreline response to storms and the configuration of nearshore sand bars                                                                                                                                                                    | NA                                                                                    | 3  | Proceedings of The Coastal Engineering Conference                                           | 10.1142/9789812791306_0233      |
| 1344 | Owens E; Reimer P;<br>Lamarche A; Marchant S;<br>O'Brien D | 2003 | Prespill shoreline mapping in prince william sound Alaska                                                                                                                                                                                    | NA                                                                                    | 8  | Environment Canada Arctic and Marine Oil Spill Program Technical Seminar (Amop) Proceedings | NA                              |
| 1345 | Li R; Di K; Ma R                                           | 2003 | 3d shoreline extraction from ikonos satellite imagery                                                                                                                                                                                        | Aerial Triangulation;<br>Rf; Shoreline                                                | 68 | Marine Geodesy                                                                              | 10.1080/01490410306699          |
| 1346 | Mercier D; Laffly D                                        | 2003 | Shorelines progradation in spitsbergen a paraglacial sedimentological respons to contemporary climatic change la progradation des littoraux meubles au spitsberg une réponse sédimentaire paraglaciale au changement climatique contemporain | GIS; Little Ice Age; Paraglacial; Polar Environments; Shoreline                       | 0  | Bulletin D'association De Geographes Francais                                               | 10.3406/bagf.2003.2345          |
| 1347 | Valpreda E; Simeoni U                                      | 2003 | Assessment of coastal erosion susceptibility at the national scale the Italian case                                                                                                                                                          | Coastal Dune; Coastal Homogeneous Unit; Geomorphology; GIS; Ionian Sea; Risk Analysis | 17 | Journal of Coastal Conservation                                                             | 10.1007/BF02755525              |
| 1348 | Souza-Filho P; Paradella W                                 | 2003 | Use of synthetic aperture radar for recognition of coastal geomorphological features land use assessment and shoreline changes in Bragança coast para northern Brazil                                                                        | Amazon; Coastal Changes; Geomorphology; Mangrove; Remote Sensing                      | 38 | Anais Da Academia Brasileira De Ciencias                                                    | 10.1590/S0001-37652003000300007 |

|      |                                      |      |                                                                                                                                                                       |                                                                                                                          |     |                                                                |                                 |
|------|--------------------------------------|------|-----------------------------------------------------------------------------------------------------------------------------------------------------------------------|--------------------------------------------------------------------------------------------------------------------------|-----|----------------------------------------------------------------|---------------------------------|
| 2175 | Souza-Filho P; Paradella W           | 2003 | Use of synthetic aperture radar for recognition of coastal geomorphological features land use assessment and shoreline changes in Braganca coast para northern Brazil | Geomorphology; Coastal Changes; Remote Sensing; Mangrove; Amazon                                                         | 35  | Anais Da Academia Brasileira De Ciencias                       | 10.1590/S0001-37652003000300007 |
| 2182 | Souza P; Tozzi H; El-Robrini M       | 2003 | Geomorphology land use and environmental hazards in Ajuruteua macrotidal sandy beach northern Brazil                                                                  | Coastal Changes; Mangrove Coast; Remote Sensing; Beach Profiles; Beach Erosion                                           | 26  | Journal of Coastal Research                                    | NA                              |
| 2183 | Brown J; Jorgenson M; Smith O; Lee W | 2003 | Long term rates of coastal erosion and carbon input Elson lagoon barrow Alaska                                                                                        | NA                                                                                                                       | 34  | Permafrost, Vols 1 and 2                                       | NA                              |
| 1304 | Blivi A; Adjoussi P                  | 2004 | Moving of the Togo shoreline detected by remote sensing la cinématique du trait de côte au Togo vue par télédétection                                                 | Coastal Erosion; Remote Sensing; Togo                                                                                    | 3   | Geo-Eco-Trop                                                   | NA                              |
| 1305 | Ricchetti E; Ricchetti G; Sani R     | 2004 | Environmental geological study of coastal areas of Salento peninsula southern Italy using multitemporal aerial photography and satellite imagery                      | Aerial Photograph; Coastal Zone; Dem; Remote Sensing; Salento; GIS; Stereo                                               | 1   | International Geoscience and Remote Sensing Symposium (IGARSS) | NA                              |
| 1306 | Yu Y; Acton S                        | 2004 | Automated delineation of coastline from polarimetric SAR imagery                                                                                                      | NA                                                                                                                       | 61  | International Journal of Remote Sensing                        | 10.1080/0143116032000160444     |
| 1307 | Ozener H                             | 2004 | Detection of shoreline and bathymetric changes                                                                                                                        | NA                                                                                                                       | 2   | Sea Technology                                                 | NA                              |
| 1308 | Fromard F; Vega C; Proisy C          | 2004 | Half a century of dynamic coastal change affecting mangrove shorelines of French Guiana a case study based on remote sensing data analyses and field surveys          | Amazonian DispeRSal System; Coastal Dynamics; French Guiana; Mangrove Development Model; Mangrove Forest; Remote Sensing | 170 | Marine Geology                                                 | 10.1016/j.margeo.2004.04.018    |

|      |                                                                                            |      |                                                                                                              |                                                                                                                                                |    |                                            |                                               |
|------|--------------------------------------------------------------------------------------------|------|--------------------------------------------------------------------------------------------------------------|------------------------------------------------------------------------------------------------------------------------------------------------|----|--------------------------------------------|-----------------------------------------------|
| 1309 | Graniczny M; Janicki T; Kowalski Z; Koszka-Maron D; Jegliński W; Uścińowicz S; Zachowicz J | 2004 | Recent development of the Vistula river outlet                                                               | Delta Front; Digital Terrain Models; GPS Surveys; Gulf of Gdańsk; Recent Delta Development; Remote Sensing; Southern Baltic Sea; Vistula River | 7  | Polish Geological Institute Special Papers | NA                                            |
| 1310 | Alexander P; Holman R                                                                      | 2004 | Quantification of nearshore morphology based on video imaging                                                | Beaches; Morphology; NearShore; NearShore Environment; Remote Sensing; Sand Bars                                                               | 68 | Marine Geology                             | 10.1016/j.margeo.2004.04.017                  |
| 1311 | Robertson V W; Whitman D; Zhang K; Leatherman S                                            | 2004 | Mapping shoreline position using airborne laser altimetry                                                    | High Water Line; Historical Shoreline Mapping; LIDAR; Shoreline Change                                                                         | 70 | Journal of Coastal Research                | NA                                            |
| 1312 | Kasinatha P P; Ramesh S; Ramana M M; Ramachandran S; Thayumanavan S                        | 2004 | Shoreline changes and near shore processes along Ennore coast east coast of south India                      | Bathymetry; Beach Profile; Ennore Port; Sediment Characteristics; Sediment Transport; Shoreline Survey                                         | 35 | Journal of Coastal Research                | NA                                            |
| 1313 | Orupabo S                                                                                  | 2004 | Coastline migration in Nigeria                                                                               | NA                                                                                                                                             | 0  | Hydro International                        | NA                                            |
| 1314 | Hai-Jun H; Short A; Zeng T; Hanslow D                                                      | 2004 | Impact of Brunswick river mouth training walls on adjacent beaches Brunswick heads New South Wales Australia | Beach Downdrift/Updrift; Beach Erosion and Accretion; GIS; Human Structure; Shoreline Change                                                   | 2  | China Ocean Engineering                    | NA                                            |
| 1315 | Turner I; Aarninkhof S; Dronkers T; Mcgrath J                                              | 2004 | CZM applications of Argus coastal imaging at the Gold Coast, Australia                                       | Artificial Reef; Beach Surveys; Coastal Monitoring; Coastal Zone Management; Image Analysis; Large Scale Coastal Behaviour; Shoreline Analysis | 54 | Journal of Coastal Research                | 10.2112/1551-5036(2004)20[739:caoaci]2.0.co;2 |

|      |                                                                     |      |                                                                                                                          |                                                                                                     |    |                                                                                                                                     |                                        |
|------|---------------------------------------------------------------------|------|--------------------------------------------------------------------------------------------------------------------------|-----------------------------------------------------------------------------------------------------|----|-------------------------------------------------------------------------------------------------------------------------------------|----------------------------------------|
| 1316 | Mohanty P; Panda U;<br>Mishra P; Takada H;<br>Sugimoto T            | 2004 | Tropical cyclones associated<br>changes along Orissa coast east<br>coast of India                                        | NA                                                                                                  | 2  | Asian and Pacific<br>Coasts, 2003 -<br>Proceedings of The<br>2nd International<br>Conference                                        | 10.1142/9789812703040_0048             |
| 1317 | Li R; Di K; Ma R                                                    | 2004 | A comparative study of<br>shoreline mapping techniques                                                                   | NA                                                                                                  | 7  | GIS For Coastal<br>Zone Management                                                                                                  | NA                                     |
| 1318 | Aucelli P; Faillace P;<br>Pellegrino P; Rosskopf C;<br>Scapillati N | 2004 | The recent evolution of Molise<br>coast southern Italy levoluzione<br>recente della costa molisana<br>italia meridionale | GIS Analyses;<br>Molise; Recent<br>Geomorphological<br>Evolution; Shoreline<br>Changes; South Italy | 6  | Alpine and<br>Mediterranean<br>Quaternary                                                                                           | NA                                     |
| 1319 | Schupp C; Thielier E;<br>O'Connell J                                | 2004 | Mapping and analysing<br>historical shoreline changes<br>using GIS                                                       | NA                                                                                                  | 5  | GIS For Coastal<br>Zone Management                                                                                                  | NA                                     |
| 1320 | Niu X; Ma R; Ali T;<br>Srivastava A; Li R                           | 2004 | Onsite coastal decision making<br>with wireless mobileGIS                                                                | Decision Support;<br>GIS; Internet/Web;<br>Mobile; Spatial<br>Infrastructures                       | 2  | International<br>Archives of The<br>Photogrammetry,<br>Remote Sensing<br>and Spatial<br>Information<br>Sciences - ISPRS<br>Archives | NA                                     |
| 1321 | Schwartz R; Deadman P;<br>Scott D; Mortsch L                        | 2004 | Modeling the impacts of water<br>level changes on a great lakes<br>community                                             | Climate Change;<br>Geographic<br>Information Systems;<br>Great Lakes;<br>Modeling; Water<br>Levels  | 15 | Journal of The<br>American Water<br>Resources<br>Association                                                                        | 10.1111/j.1752-<br>1688.2004.tb04450.x |

|      |                                                               |      |                                                                                                                                                                |                                                                                                                               |    |                                                                                                                |                                    |
|------|---------------------------------------------------------------|------|----------------------------------------------------------------------------------------------------------------------------------------------------------------|-------------------------------------------------------------------------------------------------------------------------------|----|----------------------------------------------------------------------------------------------------------------|------------------------------------|
| 1322 | Elkoushy A; Tolba E                                           | 2004 | Prediction of shoreline change by using satellite aerial imagery                                                                                               | Aerial Images; Coast; Hazards; Photogrammetry; Shoreline Change                                                               | 1  | International Archives of The Photogrammetry, Remote Sensing and Spatial Information Sciences - ISPRS Archives | NA                                 |
| 1323 | Chong A                                                       | 2004 | A case study on the establishment of shoreline position                                                                                                        | NA                                                                                                                            | 7  | Survey Review                                                                                                  | 10.1179/sre.2004.37.293.542        |
| 1324 | Baghdadi N; Gratiot N; Lefebvre J; Oliveros C; Bourguignon A  | 2004 | Coastline and mudbank monitoring in French Guiana contributions of radar and optical satellite imagery                                                         | NA                                                                                                                            | 31 | Canadian Journal of Remote Sensing                                                                             | 10.5589/m03-059                    |
| 1325 | Hennecke W                                                    | 2004 | GIS modelling of sea level rise induced shoreline changes inside coastal re-entrant two examples from southeastern Australia                                   | Flood-Tide Delta Aggradation; GIS-Based Coastal-Behaviour Modelling; Probability Assessment; Sea-Level Rise; Shoreline Change | 22 | Natural Hazards                                                                                                | 10.1023/B:NHAZ.0000020262.46491.93 |
| 1326 | Graniczny M; Janicki T; Kowalski Z; Uścińowicz S; Zachowicz J | 2004 | Geoindicators of the coastal zone reGIStration and analysis of processes and phenomena geoindykatory strefy brzegowej rejestracja i analiza procesów i zjawisk | Coastal Zone; Geoindicators; Gulf of Gdańsk; Remote Sensing                                                                   | 4  | Przegląd Geologiczny                                                                                           | NA                                 |
| 1327 | Li A; Li G; Cao L; Zhang Q; Deng S                            | 2004 | The coast erosion and evolution of the abandoned lobe of the Yellow river delta                                                                                | Coast Erosion; Erosional Quasi-Equilibrium Line; Remote Sensing; Shandong; Yellow River Delta Abandoned Lobe                  | 15 | Dili Xuebao/Acta Geographica Sinica                                                                            | NA                                 |

|      |                                              |      |                                                                         |                                                             |    |                                                                                                                                                                                 |    |
|------|----------------------------------------------|------|-------------------------------------------------------------------------|-------------------------------------------------------------|----|---------------------------------------------------------------------------------------------------------------------------------------------------------------------------------|----|
| 1279 | Kim G; Choi S; Yook W;<br>Song Y             | 2005 | Coastline change detection using<br>corona imagery                      | Coastline; Corona;<br>Geo-Referencing;<br>Satellite Imagery | 1  | Journal of The<br>Korean Society of<br>Surveying,<br>Geodesy,<br>Photogrammetry<br>and Cartography                                                                              | NA |
| 1280 | Harley M; Turner I; Short<br>A; Ranasinghe R | 2005 | Comparison of video RTK-GPS<br>and conventional beach survey<br>methods | NA                                                          | 0  | 17th Australasian<br>Coastal and Ocean<br>Engineering<br>Conference 2005<br>and The 10th<br>Australasian Port<br>and Harbour<br>Conference 2005,<br>Coasts and Ports<br>2005    | NA |
| 1281 | Srivastava A; Niu X; Di K;<br>Li R           | 2005 | Shoreline modeling and erosion<br>prediction                            | NA                                                          | 15 | American Society<br>For<br>Photogrammetry<br>and Remote<br>Sensing - Annual<br>Conference 2005 -<br>Geospatial Goes<br>Global: From Your<br>Neighborhood to<br>The Whole Planet | NA |

|      |                                                      |      |                                                                                                                                    |                                                                                                  |    |                                                                                                                                                      |                           |
|------|------------------------------------------------------|------|------------------------------------------------------------------------------------------------------------------------------------|--------------------------------------------------------------------------------------------------|----|------------------------------------------------------------------------------------------------------------------------------------------------------|---------------------------|
| 1282 | Parrish C; Sault M; White S; Sellars J               | 2005 | Empirical analysis of aerial camera filters for shoreline mapping                                                                  | NA                                                                                               | 5  | American Society For Photogrammetry and Remote Sensing - Annual Conference 2005 - Geospatial Goes Global: From Your Neighborhood to The Whole Planet | NA                        |
| 1283 | Tirkey N; Biradar R; Pikle M; Charatkar S            | 2005 | A study on shoreline changes of Mumbai coast using remote sensing and GIS                                                          | NA                                                                                               | 22 | Journal of The Indian Society of Remote Sensing                                                                                                      | 10.1007/BF02989995        |
| 1284 | Chalabi A; Mohd-Lokman H; Mohd-Suffian I; Karamali M | 2005 | Geomorphological features of Kuala Terengganu spit from ikonos imagery and aerial photographs using segmentation method            | ArcInfo; ERDAS; GIS; Ikonos; Remote Sensing; Shoreline                                           | 0  | Asian Association on Remote Sensing - 26th Asian Conference on Remote Sensing and 2nd Asian Space Conference, ACRS 2005                              | NA                        |
| 1285 | Prusty G; Dash S; Prasad S                           | 2005 | Tide normalized change detection using multitemporal satellite imagery to decipher the turtle rookery dynamics of Gahirmatha India | Change Detection; Coastal Morpho-Dynamics; GIS; Olive Ridley; Tide Normalization; Turtle Rookery | 1  | RAST 2005 - Proceedings of 2nd International Conference on Recent Advances In Space Technologies                                                     | 10.1109/RAST.2005.1512631 |



|      |                                                                            |      |                                                                                                                                |                                                                                                                                                        |     |                                                                |                             |
|------|----------------------------------------------------------------------------|------|--------------------------------------------------------------------------------------------------------------------------------|--------------------------------------------------------------------------------------------------------------------------------------------------------|-----|----------------------------------------------------------------|-----------------------------|
| 1286 | Chia A; Liew S; Heng A; Kwoh L                                             | 2005 | Satellite observations of coastline changes in the Andaman islands after the 2004 Sumatra earthquake                           | 2004 Sumatra Earthquake; Andaman Islands; Earthquake; Elevation; Subsidence                                                                            | 6   | International Geoscience and Remote Sensing Symposium (IGARSS) | 10.1109/IGARSS.2005.1526364 |
| 1287 | Psomiadis E; Parcharidis I; Poulos S; Stamatis G; Migiros G; Pavlopoulos A | 2005 | Earth observation data in seasonal and long-term coastline changes monitoring the case of Sperchios river delta central Greece | NA                                                                                                                                                     | 6   | Zeitschrift Fur Geomorphologie, Supplementband                 | NA                          |
| 1288 | Erickson L                                                                 | 2005 | Local sediment management at leeward going through in providenciales Turks and Caicos                                          | NA                                                                                                                                                     | 2   | Terra ET Aqua                                                  | NA                          |
| 1289 | Gopinath G; Seralathan P                                                   | 2005 | Rapid erosion of the coast of Sagar island west Bengal India                                                                   | Coastal Erosion; Coastal Landforms; India; Sagar Island; Satellite Data; Shoreline Change                                                              | 40  | Environmental Geology                                          | 10.1007/s00254-005-0044-9   |
| 1290 | Morton R; Miller T; Moore L                                                | 2005 | Historical shoreline changes along the us Gulf of Mexico a summary of recent shoreline comparisons and analyses                | Beach Nourishment; Coastal Erosion; Mean High Water Line; Shoreline Change Rates                                                                       | 61  | Journal of Coastal Research                                    | 10.2112/04-0230.1           |
| 1291 | Boak E; Turner I                                                           | 2005 | Shoreline definition and detection: A review                                                                                   | Coastal Accretion-Erosion; Geographic Positioning System; GPS; Image Analysis; Remote Sensing; Shoreline Analysis; Shoreline Change; Shoreline Mapping | 749 | Journal of Coastal Research                                    | 10.2112/03-0071.1           |
| 1292 | Are F; Grigoriev M; Hubberten H; Rachold V                                 | 2005 | Using thermoterrace dimensions to calculate the coastal erosion rate                                                           | NA                                                                                                                                                     | 7   | Geo-Marine Letters                                             | 10.1007/s00367-004-0193-y   |
| 1293 | Solomon S                                                                  | 2005 | Spatial and temporal variability of shoreline change in the Beaufortmackenzie region northwest territories Canada              | NA                                                                                                                                                     | 100 | Geo-Marine Letters                                             | 10.1007/s00367-004-0194-x   |

|      |                                                                       |      |                                                                                                                    |                                                                                                                                                                                   |    |                                                                                                         |                            |
|------|-----------------------------------------------------------------------|------|--------------------------------------------------------------------------------------------------------------------|-----------------------------------------------------------------------------------------------------------------------------------------------------------------------------------|----|---------------------------------------------------------------------------------------------------------|----------------------------|
| 1294 | Overton M; Fisher J; Dolan R                                          | 2005 | Predicting shoreline change on a manipulated shoreline                                                             | NA                                                                                                                                                                                | 3  | Proceedings of The Coastal Engineering Conference                                                       | 10.1142/9789812701916-0198 |
| 1295 | Penland S; Connor J P; Beall A; Fearnley S; Williams S                | 2005 | Changes in Louisiana's shoreline 1855-2002                                                                         | Barrier Islands; Beach Nourishment; BreakwaterRS; Coastal Restoration; Dunes; Erosion; Erosional Headland; Jetties; Louisiana; Mississippi River Delta; Seawall; Shoreline Change | 67 | Journal of Coastal Research                                                                             | NA                         |
| 1296 | Suursaar ; Tõnisson H; Kullas T; Orviku K; Kont A; Rivis R; Otsmann M | 2005 | A study of hydrodynamic and coastal geomorphic processes in küdema Bay the Baltic sea                              | Currents; Hydrodynamic Models; Sea Level; Shoreline Changes; Waves                                                                                                                | 4  | Wit Transactions on The Built Environment                                                               | NA                         |
| 1297 | Sener E; Davraz A; Ismailov T                                         | 2005 | Investigation of Burdur lake shoreline change by using satellite images                                            | NA                                                                                                                                                                                | 2  | Proceedings of The 7th International Conference on The Mediterranean Coastal Environment, Medcoast 2005 | NA                         |
| 1298 | Jackson M; Jensen J                                                   | 2005 | An evaluation of remote sensing derived landscape ecology metrics for reservoir shoreline environmental monitoring | NA                                                                                                                                                                                | 4  | Photogrammetric Engineering and Remote Sensing                                                          | 10.14358/PERS.71.12.1387   |
| 1299 | Takewaka S                                                            | 2005 | Measurements of shoreline positions and intertidal foreshore slopes with Xband marine radar system                 | Coastal Remote Sensing; Foreshore Slope; Intertidal Morphology; Shoreline Position; X-Band Radar                                                                                  | 28 | Coastal Engineering Journal                                                                             | 10.1142/S0578563405001203  |

|      |                                                                              |      |                                                                                                                    |                                                                                                             |    |                                                                              |                            |
|------|------------------------------------------------------------------------------|------|--------------------------------------------------------------------------------------------------------------------|-------------------------------------------------------------------------------------------------------------|----|------------------------------------------------------------------------------|----------------------------|
| 1300 | Sundaravadivelu R;<br>Sivasankaravel M;<br>Rajeshwararao N;<br>Nagabhushan N | 2005 | Coastal erosion studies in<br>Puducherry using GIS and<br>remote sensing                                           | NA                                                                                                          | 1  | Solutions to<br>Coastal Disasters<br>2005 - Proceedings<br>of The Conference | 10.1061/40774(176)30       |
| 1301 | Seymour R; Guza R;<br>O'Reilly W                                             | 2005 | Monitoring regional shoreline<br>change                                                                            | NA                                                                                                          | 0  | California and The<br>World Ocean -<br>Proceedings of The<br>Conference      | 10.1061/40761(175)2        |
| 1302 | Mills J; Buckley S; Mitchell<br>H; Clarke P; Edwards S                       | 2005 | A geomatics data integration<br>technique for coastal change<br>monitoring                                         | Coastal Change;<br>Data Integration;<br>Geomatics;<br>Photogrammetry;<br>Surface Matching                   | 85 | Earth Surface<br>Processes and<br>Landforms                                  | 10.1002/esp.1165           |
| 1303 | Alphan H                                                                     | 2005 | Perceptions of coastline changes<br>in river deltas southeast<br>Mediterranean coast of Turkey                     | Coastline Changes;<br>Cukurova;<br>Mediterranean<br>Landscape; Remote<br>Sensing; River<br>Deltas           | 15 | International<br>Journal of<br>Environment and<br>Pollution                  | 10.1504/IJEP.2005.006398   |
| 2164 | Trebossen H; Deffontaines<br>B; Classeau N; Kouame J;<br>Rudant J            | 2005 | Monitoring coastal evolution<br>and associated littoral hazards of<br>French Guiana shoreline with<br>radar images | SAR Remote Sensing;<br>Shoreline; Coastal<br>Erosion;<br>Sedimentation;<br>Nautical Chart;<br>French Guiana | 10 | Comptes Rendus<br>Geoscience                                                 | 10.1016/j.crte.2005.05.013 |

|      |                                       |      |                                                                                                                              |                                                                                     |   |                                                                                                                                                                                                   |                   |
|------|---------------------------------------|------|------------------------------------------------------------------------------------------------------------------------------|-------------------------------------------------------------------------------------|---|---------------------------------------------------------------------------------------------------------------------------------------------------------------------------------------------------|-------------------|
| 1265 | Starek M; Sedighi A                   | 2006 | Monitoring hurricane effects on aquifer salinity using ALSM                                                                  | NA                                                                                  | 0 | American Society For Photogrammetry and Remote Sensing - Annual Conference of The American Society For Photogrammetry and Remote Sensing 2006: Prospecting For Geospatial Information Integration | NA                |
| 1266 | Yang J; Choi C; Jeon S; Hong S; Kim Y | 2006 | An anlysis of coastal topography and land cover changes at haeundae beach South Korea by merging GIS and remote sensing data | Aerial Photograph; Coastal Erosion; Coastline; Land Cover Map; Soil Loss            | 1 | Asian Association on Remote Sensing - 27th Asian Conference on Remote Sensing, ACRS 2006                                                                                                          | NA                |
| 1267 | Marghany M; Hashim M                  | 2006 | 2 canny and velocity bunching algorithms for modelling shoreline change using multiSAR data                                  | Canny Algorithm; ERS-1; RadaRSat-1 SAR; Shoreline Change; Velocity Bunching         | 0 | Asian Association on Remote Sensing - 27th Asian Conference on Remote Sensing, ACRS 2006                                                                                                          | NA                |
| 1268 | Zoran L; Golovanov C; Zoran M         | 2006 | Multisensor image fusion for Romanian Black sea coastal zone analysis                                                        | Environmental Changes; Fusion; North-Western Black Sea Coastal Zone; Remote Sensing | 2 | Proceedings of Spie - The International Society For Optical Engineering                                                                                                                           | 10.1117/12.683210 |

|      |                                    |      |                                                                                                                                                                                                                                                                                                                                                    |                                                                                      |     |                                                |                           |
|------|------------------------------------|------|----------------------------------------------------------------------------------------------------------------------------------------------------------------------------------------------------------------------------------------------------------------------------------------------------------------------------------------------------|--------------------------------------------------------------------------------------|-----|------------------------------------------------|---------------------------|
| 1269 | He Q; Zhang B; Li C                | 2006 | Monitoring the change of the coastline of the Yellow river delta by integrating remote sensing rs and GIS                                                                                                                                                                                                                                          | Coastline Evolution; GIS; RS; Yellow River Delta                                     | 6   | Geology In China                               | NA                        |
| 1270 | Ouma Y; Tateishi R                 | 2006 | A water index for rapid mapping of shoreline changes of five east African rift valley lakes an empirical analysis using Landsat TM and ETM data                                                                                                                                                                                                    | NA                                                                                   | 195 | International Journal of Remote Sensing        | 10.1080/01431160500309934 |
| 1271 | Narayana A; Priju C                | 2006 | Landform and shoreline changes inferred from satellite images along the central Kerala coast                                                                                                                                                                                                                                                       | Coastal Landforms; Kerala Coast; Paleostrandlines; Remote Sensing; Shoreline Changes | 17  | Journal of The Geological Society of India     | NA                        |
| 1272 | Moore L; Ruggiero P; List J        | 2006 | Comparing mean high water and high-water line shorelines should prosy datum offsets be incorporated into shoreline change analysis                                                                                                                                                                                                                 | Coastal Erosion; Coastal Mapping; LIDAR; Shoreline Change                            | 84  | Journal of Coastal Research                    | 10.2112/04-0401.1         |
| 1273 | Romagnoli C; Mancini F; Brunelli R | 2006 | Historical shoreline changes at an active island volcano stramboli Italy                                                                                                                                                                                                                                                                           | Aeolian Islands; Coastal Changes; Volcanic Coasts; Volcanogenic Sediments            | 12  | Journal of Coastal Research                    | 10.2112/05-0554.1         |
| 1274 | Durand P; Heurtefeux H             | 2006 | An evaluation method of the impact of relative sea level rise on a barrier lagoon system example of the vic and pierre blanche area hérault France impact de l'élévation du niveau marin sur l'évolution future dun cordon littoral lagunaire une methode dévaluation exemple des étangs de vie et de pierre blanche littoral méditerranéen France | NA                                                                                   | 12  | Zeitschrift Fur Geomorphologie                 | NA                        |
| 1275 | Kench P; Brander R                 | 2006 | Response of reef island shorelines to seasonal climate oscillations south maalhoshmadulu Atoll maldives                                                                                                                                                                                                                                            | NA                                                                                   | 113 | Journal of Geophysical Research: Earth Surface | 10.1029/2005JF000323      |

|      |                                                                                         |      |                                                                                                                      |                                                                                          |    |                                                                                                                |                    |
|------|-----------------------------------------------------------------------------------------|------|----------------------------------------------------------------------------------------------------------------------|------------------------------------------------------------------------------------------|----|----------------------------------------------------------------------------------------------------------------|--------------------|
| 1276 | Guariglia A; Buonamassa A; Losurdo A; Saladino R; Trivigno M; Zaccagnino A; Colangelo A | 2006 | A multisource approach for coastline mapping and identification of shoreline changes                                 | Coastline Mapping; GPS; Multitemporal Analysis; Satellite; Tide                          | 95 | Annals of Geophysics                                                                                           | NA                 |
| 1277 | Chalabi A; Mohd-Lokman H; Mohd-Suffian I; Karamali M; Karthigeyan V; Masita M           | 2006 | Monitoring shoreline change using ikonos image and aerial photographs a case study of Kuala Terengganu area Malaysia | Aerial Photographs; Ikonos; Segmentation; Shoreline                                      | 16 | International Archives of The Photogrammetry, Remote Sensing and Spatial Information Sciences - ISPRS Archives | NA                 |
| 1278 | Song P; Zhang J; Song W                                                                 | 2006 | Dynamic analysis method of coastline based on the computation of stationary points                                   | Coastline; Erosion; Geographic Information; Siltation; Stationary Points                 | 0  | Dianzi Yu Xinxu Xuebao/Journal of Electronics and Information Technology                                       | NA                 |
| 2154 | Sallenger A; Stockdon H; Fauver L; Hansen M; Thompson D; Wright C; Lillycrop J          | 2006 | Hurricanes 2004 an overview of their characteristics and coastal change                                              | NA                                                                                       | 63 | Estuaries and Coasts                                                                                           | 10.1007/BF02798647 |
| 2155 | De M J; Braga A; Pierri G; Klein A                                                      | 2006 | Shoreline change analysis near itapocu river inlet barra velha santa catarina Brazil 1978 to 2002                    | Inlet; Itapocu River; Santa Catarina                                                     | 1  | Journal of Coastal Research                                                                                    | NA                 |
| 2156 | Lamour M; Odreski L; Soares C                                                           | 2006 | Considerations regarding shoreline morphology variation at an inlet in southern Brazil                               | Paranagua Bay; Erosion; GPS                                                              | 4  | Journal of Coastal Research                                                                                    | NA                 |
| 2157 | Jackson C; Cleary W; Knierim A                                                          | 2006 | Management and erosion mitigation issues related to ebb channel repositioning rich inlet North Carolina USA          | Shoreline Change; Inlet-Induced; Ebb Delta; Ebb Channel; Channel Orientation; Swash BaRS | 0  | Journal of Coastal Research                                                                                    | NA                 |
| 2158 | Leon J; Correa C                                                                        | 2006 | Quantification of shoreline change in Salaverry Peru                                                                 | Shoreline Variation; Erosion; GIS; Peruvian Coast; Groyne; Breakwater                    | 1  | Journal of Coastal Research                                                                                    | NA                 |
| 2159 | Pais-Barbosa J; Veloso-Gomes F; Taveira-Pinto F                                         | 2006 | Application of geographical information systems on Portuguese coastal projects                                       | GIS; Coastal Protection; Coastal                                                         | 4  | Journal of Coastal Research                                                                                    | NA                 |

|      |                              |      |                                                                                                                                                    | Defences;<br>Management                                                     |    |                                                                                                                                       |                              |
|------|------------------------------|------|----------------------------------------------------------------------------------------------------------------------------------------------------|-----------------------------------------------------------------------------|----|---------------------------------------------------------------------------------------------------------------------------------------|------------------------------|
| 2160 | Moore L; Ruggiero P; List J  | 2006 | Comparing mean high water and high-water line shorelines should proxy datum offsets be incorporated into shoreline change analysis                 | Coastal Erosion; LIDAR; Coastal Mapping; Shoreline Change                   | 76 | Journal of Coastal Research                                                                                                           | 10.2112/04-0401.1            |
| 2161 | Durand P; Heurtefeux H       | 2006 | An evaluation method of the impact of relative sea level rise on a barrier lagoon system example of the Vic and Pierre blanche area Herault France | NA                                                                          | 10 | Zeitschrift Fur Geomorphologie                                                                                                        | NA                           |
| 2162 | List J; Farris A; Sullivan C | 2006 | Reversing storm hotspots on sandy beaches spatial and temporal characteristics                                                                     | Coastal Erosion; Hotspot; Shoreline Change; Outer Banks; Cape Cod; Storm    | 84 | Marine Geology                                                                                                                        | 10.1016/j.margeo.2005.10.003 |
| 2214 | Richmond B                   | 2006 | Understanding shoreline change                                                                                                                     | NA                                                                          | 1  | Coastal Erosion Responses For Alaska, Workshop Proceedings                                                                            | NA                           |
| 1231 | Lia X; Michiel C; Damen J    | 2007 | Detection of shoreline change and analysis of its environmental impact applied the remote sensing methods in the Pearl river estuary China         | Coastline Change; Environmental Impact; Pearl River Estuary; Remote Sensing | 0  | Proceedings, 32nd International Symposium on Remote Sensing of Environment: Sustainable Development Through Global Earth Observations | NA                           |
| 1233 | Al-Hatrushi S                | 2007 | Shoreline monitoring at Al Hawasina tidal inlet using remote sensing and GIS techniques                                                            | Coastal Erosion; Coastal Geomorphology; Tidal Inlets                        | 0  | 28th Asian Conference on Remote Sensing 2007, ACRS 2007                                                                               | NA                           |

|      |                                                          |      |                                                                                                                                           |                                                                                                                                                   |    |                                                                |                             |
|------|----------------------------------------------------------|------|-------------------------------------------------------------------------------------------------------------------------------------------|---------------------------------------------------------------------------------------------------------------------------------------------------|----|----------------------------------------------------------------|-----------------------------|
| 1234 | Wu T; Lee M                                              | 2007 | Geological lineament and shoreline detection in SAR images                                                                                | Component; Geological Lineament; SAR; Shoreline                                                                                                   | 6  | International Geoscience and Remote Sensing Symposium (IGARSS) | 10.1109/IGARSS.2007.4422845 |
| 1235 | Kaiser M; Geriesh M                                      | 2007 | Water resources assessment at Elarish area using remote sensing and GIS north Sinai Egypt                                                 | Change Detection; Engineering Structures; Groundwater Analyses; Integrated GIS; Shoreline Protection; Water Chemistry; Water Resources Management | 2  | International Geoscience and Remote Sensing Symposium (IGARSS) | 10.1109/IGARSS.2007.4424064 |
| 1236 | Wang C; Chen K; Lee H; Lee J; Boerner W; Wang R; Wan H   | 2007 | Disaster monitoring and environmental alert in Taiwan by repeat pass spaceborne SAR                                                       | Deformation; Disaster Monitoring; Flood Extent; Interferometry; Synthetic Aperture Radar (SAR)                                                    | 1  | International Geoscience and Remote Sensing Symposium (IGARSS) | 10.1109/IGARSS.2007.4423384 |
| 1238 | Vespremeanu-Stroe A; Constantinescu S; Tătui F; Giosan L | 2007 | Multi-decadal evolution and north atlantic oscillation influences on the dynamics of the Danube delta shoreline                           | Black Sea; Longshore Sediment Transport (Lst); Multi-Decadal Climate Variability; Shoreline Retreat/Advance; Storms                               | 45 | Journal of Coastal Research                                    | NA                          |
| 1239 | Dewidar K; Frihy O                                       | 2007 | Pre and post beach response to engineering hard structures using Landsat timeseries at the northwestern part of the Nile delta Egypt      | Coastal Processes; Hard Structures; Shoreline Mapping; Shoreline Retreat                                                                          | 23 | Journal of Coastal Conservation                                | 10.1007/s11852-008-0013-z   |
| 1240 | Liu H; Sherman D; Gu S                                   | 2007 | Automated extraction of shorelines from airborne light detection and ranging data and accuracy assessment based on Monte Carlo simulation | Aerial Photography; Contouring Method; Cross-Shore Profile Method; Mean High Water; Shoreline Mapping; The                                        | 75 | Journal of Coastal Research                                    | 10.2112/05-0580.1           |



Upper Texas Gulf  
Coast

|      |                                                  |      |                                                                                                                                                                                                     |                                                                                                                   |    |                                                                                                                                                          |                              |
|------|--------------------------------------------------|------|-----------------------------------------------------------------------------------------------------------------------------------------------------------------------------------------------------|-------------------------------------------------------------------------------------------------------------------|----|----------------------------------------------------------------------------------------------------------------------------------------------------------|------------------------------|
| 1241 | M-Muslim A; Foody G;<br>Atkinson P               | 2007 | Shoreline mapping from coarse<br>spatial resolution remote sensing<br>imagery of Seberang Takir<br>Malaysia                                                                                         | Contouring; Remote<br>Sensing; Soft<br>Classification;<br>Subpixel; Super-<br>Resolution; Two-<br>Point Histogram | 41 | Journal of Coastal<br>Research                                                                                                                           | 10.2112/04-0421.1            |
| 1242 | Jackson J C; Alexander C;<br>Bush D              | 2007 | Back barrier shoreline change<br>history Cumberland island<br>Georgia 1857-2002                                                                                                                     | NA                                                                                                                | 3  | Southeastern<br>Geology                                                                                                                                  | NA                           |
| 1243 | Lazarus E; Murray A                              | 2007 | Process signatures in regional<br>patterns of shoreline change on<br>annual to decadal time scales                                                                                                  | NA                                                                                                                | 17 | Geophysical<br>Research Letters                                                                                                                          | 10.1029/2007GL031047         |
| 1244 | Limber P; List J; Warren J;<br>Farris A; Weber K | 2007 | Using topographic Lidar data to<br>delineate the North Carolina<br>shoreline                                                                                                                        | NA                                                                                                                | 4  | Coastal Sediments<br>'07 - Proceedings of<br>6th International<br>Symposium on<br>Coastal<br>Engineering and<br>Science of Coastal<br>Sediment Processes | 10.1061/40926(239)144        |
| 1245 | Mäkiaho J                                        | 2007 | Estimation of ancient and future<br>shoreline positions in the vicinity<br>of Olkiluoto an island on the<br>western coast of Finland the<br>difference between grid and tin<br>based GIS approaches | Finland; Geographic<br>Information Systems<br>(GIS);<br>Palaeogeography;<br>Paleo-Shorelines;<br>Terrain Analysis | 5  | Palaeogeography,<br>Palaeoclimatology,<br>Palaeoecology                                                                                                  | 10.1016/j.palaeo.2007.05.009 |

|      |                                                                                                                           |      |                                                                                                    |                                                                                                                                                                                          |    |                              |                                               |
|------|---------------------------------------------------------------------------------------------------------------------------|------|----------------------------------------------------------------------------------------------------|------------------------------------------------------------------------------------------------------------------------------------------------------------------------------------------|----|------------------------------|-----------------------------------------------|
| 1246 | Xia Z; Jia P; Lei Y; Chen Y                                                                                               | 2007 | Dynamics of coastal land use patterns of inner Lingdingyang Bay in the Zhujiang river estuary      | Coastal Land Use Pattern; Inner Lingdingyang Bay; Land Reclamation from Sea; Zhujiang River Estuary                                                                                      | 10 | Chinese Geographical Science | 10.1007/s11769-007-0222-7                     |
| 1247 | Tağil                                                                                                                     | 2007 | Quantifying the change detection of the uluabat wetland Turkey by use of Landsat images            | Change Detection; Fragmentation; Landscape Change; Pattern Metrics; Remote Sensing                                                                                                       | 15 | Ekoloji                      | NA                                            |
| 1248 | Basterretxea G; Orfila A; Jordi A; Fornós J; Tintoré J                                                                    | 2007 | Evaluation of a small volume renourishment strategy on a narrow Mediterranean beach                | Beach Evolution; Beach Variability; Nourishment                                                                                                                                          | 17 | Geomorphology                | 10.1016/j.geomorph.2006.10.019                |
| 1250 | Khoshnavan H                                                                                                              | 2007 | Beach sediments morphodynamics and risk assessment Caspian sea coast Iran                          | NA                                                                                                                                                                                       | 11 | Quaternary International     | 10.1016/j.quaint.2007.02.014                  |
| 1251 | Kroon A; Davidson M; Aarninkhof S; Archetti R; Armaroli C; Gonzalez M; Medri S; Osorio A; Aagaard T; Holman R; Spanhoff R | 2007 | Application of remote sensing video systems to coastline management problems                       | Argus Video System; Beach; Beach Nourishment; Beach Profiles; Coastal State Indicator; Coastline Management; Dredging; Shoreface Nourishment; Shorelines; Spit; Storm Events; Waterlines | 96 | Coastal Engineering          | 10.1016/j.coastaleng.2007.01.004              |
| 1252 | Ekerçin S                                                                                                                 | 2007 | Coastline change assessment at the aegean sea coasts in Turkey using multitemporal Landsat imagery | Change Detection; Coastal Zone Management; Digital Image Processing; Multitemporal Image Data                                                                                            | 65 | Journal of Coastal Research  | 10.2112/04-0398.1                             |
| 1253 | Plant N; Aarninkhof S; Turner I; Kingston K                                                                               | 2007 | The performance of shoreline detection models applied to video imagery                             | Management; Morphology                                                                                                                                                                   | 89 | Journal of Coastal Research  | 10.2112/1551-5036(2007)23[658:TPOSDM]2.0.CO;2 |

|      |                                                              |      |                                                                                                                                                                           |                                                                                                                     |     |                                                               |                                |
|------|--------------------------------------------------------------|------|---------------------------------------------------------------------------------------------------------------------------------------------------------------------------|---------------------------------------------------------------------------------------------------------------------|-----|---------------------------------------------------------------|--------------------------------|
| 1254 | Tigny V; Ozer A; De F G; Baroli M; Djenidi S                 | 2007 | Relationship between the evolution of the shoreline and the posidonia Oceanica meadow limit in a Sardinian coastal zone                                                   | Coastline Evolution; Gulf of Oristano; Remote Sensing; Seagrass Meadow                                              | 21  | Journal of Coastal Research                                   | 10.2112/05-0472.1              |
| 1255 | Carrasco A; Ferreira ; Matias A; Dias J                      | 2007 | Historic monuments threatened by coastal hazards at boca do Rio Algarve Portugal                                                                                          | Boca Do Rio; Historic Monuments; Management; Shoreline Retreat                                                      | 8   | Coastal Management                                            | 10.1080/08920750601042278      |
| 1256 | Robertson V W; Zhang K; Whitman D                            | 2007 | Hurricane induced beach change derived from airborne laser measurements near Panama city Florida                                                                          | Beach Width Change; GIS; LIDAR; Shoreline Change; Volume Change                                                     | 45  | Marine Geology                                                | 10.1016/j.margeo.2006.11.003   |
| 1257 | El B M                                                       | 2007 | Erosion and accretion rates and their associated sediment characters along Ras El Bar coast northeast Nile delta Egypt                                                    | Damietta Harbour; Egypt; Engineering Structures; Mediterranean; Nile Delta; Ras El Bar                              | 9   | Environmental Geology                                         | 10.1007/s00254-006-0447-2      |
| 1258 | Li X                                                         | 2007 | Application of the remote sensing method in the analysis of the shoreline change and its environmental impact in the lingdingyang Bay Pearl river estuary Guangdong China | Lingdingyang; Pearl River Estuary; Remote Sensing; Shoreline Change                                                 | 8   | Geological Bulletin of China                                  | NA                             |
| 1259 | Mangham W; Williams H                                        | 2007 | GPS based analysis of shoreline change 1995-2005 mad island marsh preserve Matagorda county Texas                                                                         | NA                                                                                                                  | 2   | Texas Journal of Science                                      | NA                             |
| 1260 | Anil A H; Yüksel Y; Özkan Ç E; Güler I; Cevdet Y A; Bayram B | 2007 | Determination and control of longshore sediment transport a case study                                                                                                    | Coastal Sediment Transport; Coastal Zone Management; Longshore Sediment Transport; Remote Sensing; Shoreline Change | 13  | Ocean Engineering                                             | 10.1016/j.oceaneng.2006.01.009 |
| 1261 | Alesheikh A; Ghorbanali A; Nouri N                           | 2007 | Coastline change detection using remote sensing                                                                                                                           | Band Ratios; Coastline Extraction; Histogram Thresholding;                                                          | 268 | International Journal of Environmental Science and Technology | 10.1007/BF03325962             |

|      |                                                                                    |      |                                                                                                                                                                                                  |                                                                                                                                                                                            |    |                                                                                                                                               |                           |
|------|------------------------------------------------------------------------------------|------|--------------------------------------------------------------------------------------------------------------------------------------------------------------------------------------------------|--------------------------------------------------------------------------------------------------------------------------------------------------------------------------------------------|----|-----------------------------------------------------------------------------------------------------------------------------------------------|---------------------------|
| 1262 | Hernández L; Alonso I;<br>Sánchez-Pérez I;<br>Alcántara-Carrió J;<br>Montesdeoca I | 2007 | Shortage of sediments in the<br>Maspalomas dune field gran<br>Canaria canary islands deduced<br>from analysis of aerial<br>photographs foraminiferal<br>content and sediment transport<br>trends | Coastal Erosion;<br>Foraminifera; Grain<br>Size; Sediment<br>Supply                                                                                                                        | 26 | Journal of Coastal<br>Research                                                                                                                | 10.2112/04-0286.1         |
| 1263 | Mcninch J                                                                          | 2007 | Bar and swash imaging radar<br>basir a mobile Xband radar<br>designed for mapping nearshore<br>sand bars and swash defined<br>shorelines over large distances                                    | Morphodynamics;<br>NearShore; Remote<br>Sensing; Video                                                                                                                                     | 32 | Journal of Coastal<br>Research                                                                                                                | 10.2112/05-0452.1         |
| 1264 | Mateo Z; Siringan F                                                                | 2007 | Tectonic control of high<br>frequency Holocene delta<br>switching and fluvial migration<br>in Lingayen Gulf Bayhead<br>northwestern Philippines                                                  | Agno River; Alluvial<br>Fans; Beach Ridges;<br>Earthquakes;<br>Meander Belts;<br>Shoreline Change;<br>Strand plain                                                                         | 8  | Journal of Coastal<br>Research                                                                                                                | 10.2112/04-0152.1         |
| 2152 | Kaiser M; Geriesh M                                                                | 2007 | Water resources assessment at<br>Eiarish area using remote<br>sensing and GIS north Sinai<br>Egypt                                                                                               | Change Detection;<br>Engineering<br>Structures;<br>Groundwater<br>Analyses; Integrated<br>GIS; Shoreline<br>Protection; Water<br>Chemistry; Water<br>Resources<br>Management<br>(Keywords) | 1  | IGARSS: 2007 IEEE<br>International<br>Geoscience and<br>Remote Sensing<br>Symposium, Vols<br>1-12: Sensing and<br>Understanding<br>Our Planet | NA                        |
| 2153 | Wu W                                                                               | 2007 | Coastline evolution monitoring<br>and estimation a case study in<br>the region of Nouakchott<br>Mauritania                                                                                       | NA                                                                                                                                                                                         | 25 | International<br>Journal of Remote<br>Sensing                                                                                                 | 10.1080/01431160701227612 |

|      |                                                |      |                                                                                                                             |                                                                                                          |     |                                                                                                                                  |                                 |
|------|------------------------------------------------|------|-----------------------------------------------------------------------------------------------------------------------------|----------------------------------------------------------------------------------------------------------|-----|----------------------------------------------------------------------------------------------------------------------------------|---------------------------------|
| 1212 | Revell D; Barnard P;<br>Mustain N; Storlazzi C | 2008 | Influence of harbor construction<br>on downcoast morphological<br>evolution Santa Barbara,<br>California                    | NA                                                                                                       | 1   | Solutions to<br>Coastal Disasters<br>Congress 2008 -<br>Proceedings of The<br>Solutions to<br>Coastal Disasters<br>Congress 2008 | 10.1061/40968(312)57            |
| 1213 | Samanta S; Paul S                              | 2008 | Effects of coastal processes on<br>shoreline changes along<br>Dighashankarpur coastal tract<br>using remote sensing and GIS | Coastal Process and<br>Shoreline Change;<br>GIS; Remote Sensing                                          | 0   | 29th Asian<br>Conference on<br>Remote Sensing<br>2008, ACRS 2008                                                                 | NA                              |
| 1214 | Zhao X; Liu J; Yang X                          | 2008 | Study of geological hazards<br>assessment on coastline change                                                               | Fuzzy Hierarchy<br>Comprehensive<br>Evaluation;<br>Geological Hazard;<br>GIS; The Change of<br>Coastline | 0   | Proceedings of<br>Spie - The<br>International<br>Society For Optical<br>Engineering                                              | 10.1117/12.813046               |
| 1215 | Zoran L; Golovanov C;<br>Zoran M               | 2008 | Multispectral and multitemporal<br>satellite data fusion for coastal<br>zone dynamics assessment                            | Black Sea Coastal<br>Zone; Changes;<br>Constantza; Data<br>Fusion; Satellite<br>Remote Sensing           | 1   | Proceedings of<br>Spie - The<br>International<br>Society For Optical<br>Engineering                                              | 10.1117/12.800357               |
| 1216 | Jones B; Hinkel K; Arp C;<br>Eisner W          | 2008 | Modern erosion rates and loss of<br>coastal features and sites<br>Beaufort sea coastline Alaska                             | Alaska; Arctic;<br>Beaufort Sea<br>Coastline; Coastal<br>Erosion; Shoreline<br>Analysis                  | 63  | Arctic                                                                                                                           | NA                              |
| 1217 | Appeaning A K; Walkden<br>M; Mills J           | 2008 | Detection measurement and<br>prediction of shoreline recession<br>in Accra, Ghana                                           | Coastline; Erosion<br>Prediction; Sea-Level<br>Rise; Shoreline<br>Evolution                              | 139 | ISPRS Journal of<br>Photogrammetry<br>and Remote<br>Sensing                                                                      | 10.1016/j.isprsjprs.2008.04.001 |

|      |                                                                      |      |                                                                                                                                                   |                                                                                                                                                          |     |                                                                                   |                                  |
|------|----------------------------------------------------------------------|------|---------------------------------------------------------------------------------------------------------------------------------------------------|----------------------------------------------------------------------------------------------------------------------------------------------------------|-----|-----------------------------------------------------------------------------------|----------------------------------|
| 1218 | Wang Y; Allen T                                                      | 2008 | Estuarine shoreline change detection using Japanese ALOS, PALSAR HH and JERS-1 L-HH SAR data in the Albemarle-Pamlico sounds, North Carolina, USA | NA                                                                                                                                                       | 36  | International Journal of Remote Sensing                                           | 10.1080/01431160801932525        |
| 1219 | Chen L; Jiang W; Chen Y; Li J; Lin A                                 | 2008 | Forecasting coastline change based on GML 1 model: A case study on Liaohe river delta                                                             | Coastline Change Forecasting; Gm (1; 1) Model; Grey Model; Liaohe River Delta                                                                            | 2   | Yingyong Jichu Yu Gongcheng Kexue Xuebao/Journal of Basic Science and Engineering | NA                               |
| 1220 | Ojeda E; Guillén J                                                   | 2008 | Shoreline dynamics and beach rotation of artificial embayed beaches                                                                               | Beach Rotation; Nourishment; Shoreline Position; Video Imaging                                                                                           | 106 | Marine Geology                                                                    | 10.1016/j.margeo.2008.03.010     |
| 1221 | Bayram B; Acar U; Seker D; Ari A                                     | 2008 | A novel algorithm for coastline fitting through a case study over the Bosphorus                                                                   | Coastline Extraction; Image Processing; Remote Sensing; Segmentation                                                                                     | 28  | Journal of Coastal Research                                                       | 10.2112/07-0825.1                |
| 1222 | Marfai M; Almohammad H; Dey S; Susanto B; King L                     | 2008 | Coastal dynamic and shoreline mapping multi sources spatial data analysis in Semarang, Indonesia                                                  | Digital Number Value Analysis; Multi-Sources Spatial Data; Semarang-Indonesia; Shoreline Dynamic; Visual Interpretation                                  | 91  | Environmental Monitoring and Assessment                                           | 10.1007/s10661-007-9929-2        |
| 1223 | Kroon A; Larson M; Möller I; Yokoki H; Rozynski G; Cox J; Larroude P | 2008 | Statistical analysis of coastal morphological data sets over seasonal to decadal time scales                                                      | Complex Principal Component Analysis; Data Analysis; Long-Term Morphological Evolution; NearShore BaRS; Sand Waves; Shoreline Undulations; Visualization | 49  | Coastal Engineering                                                               | 10.1016/j.coastaleng.2007.11.006 |
| 1224 | Shaw J; Wolinsky M; Paola C; Voller V                                | 2008 | An image based method for shoreline mapping on complex coasts                                                                                     | NA                                                                                                                                                       | 35  | Geophysical Research Letters                                                      | 10.1029/2008GL033963             |

|      |                                                 |      |                                                                                                                                                                                                                                                     |                                                                                                            |    |                                                                                                                |                           |
|------|-------------------------------------------------|------|-----------------------------------------------------------------------------------------------------------------------------------------------------------------------------------------------------------------------------------------------------|------------------------------------------------------------------------------------------------------------|----|----------------------------------------------------------------------------------------------------------------|---------------------------|
| 1225 | Ghanavati E; Firouzabadi P; Jangi A; Khosravi S | 2008 | Monitoring geomorphologic changes using Landsat tm and ETM data in the Hendijan river delta southwest Iran                                                                                                                                          | NA                                                                                                         | 29 | International Journal of Remote Sensing                                                                        | 10.1080/01431160701294679 |
| 1226 | Wang C; Chen K; Lee J; Boerner W                | 2008 | Long-term and short-term surface deformation mapping by repeat-pass satellite SAR                                                                                                                                                                   | Deformation;<br>Disaster Monitoring;<br>Flood Extent;<br>Interferometry;<br>Synthetic Aperture Radar (SAR) | 0  | Proceedings of The European Conference on Synthetic Aperture Radar, EUSAR                                      | NA                        |
| 1227 | Li R; Deshpande S; Niu X; Lee I; Wu B           | 2008 | Multidimensional geospatial data integration for coastal change analysis                                                                                                                                                                            | Analysis; Change;<br>Coast; High Resolution;<br>Integration; LIDAR;<br>Orthoimage;<br>Satellite            | 2  | International Archives of The Photogrammetry, Remote Sensing and Spatial Information Sciences - ISPRS Archives | NA                        |
| 1228 | Kim Y; Lee D; Hong S; Chung C; Lee K            | 2008 | Coastline change analysis using RTK-GPS and aerial photo                                                                                                                                                                                            | Coastline;<br>Qualitative Analysis;<br>Rtk-GPS; Time Series Analysis                                       | 1  | International Archives of The Photogrammetry, Remote Sensing and Spatial Information Sciences - ISPRS Archives | NA                        |
| 1229 | Bini M; CaSARosa N; Ribolini A                  | 2008 | Multitemporal 1938-2004 evolution of the Pisan shoreline based on the comparison of georeferenced aerial images lev oluzione diacronica della linea di riva del litorale pisano 1938-2004 sulla base del confront di immagini aeree georeferenziate | Coastal Erosion;<br>Pisan Littoral;<br>Remote Sensing;<br>Shoreline                                        | 25 | Atti Della Societa toscana Di Scienze Naturali, Memorie Serie A                                                | NA                        |

|      |                                                    |      |                                                                                                                                             |                                                                                                                                                      |    |                                                                                     |                              |
|------|----------------------------------------------------|------|---------------------------------------------------------------------------------------------------------------------------------------------|------------------------------------------------------------------------------------------------------------------------------------------------------|----|-------------------------------------------------------------------------------------|------------------------------|
| 1230 | Restrepo J; López S                                | 2008 | Morphodynamics of the Pacific and caribbean deltas of Colombia, South America                                                               | Caribbean Coast; Colombia; Delta Morphodynamics; Deltas; Discharge; El Niño; Pacific Coast; Recent Delta Evolution; Relative Sea Level; Tides; Waves | 49 | Journal of South American Earth Sciences                                            | 10.1016/j.jsames.2007.09.002 |
| 2137 | Jones B; Hinkel K; Arpi C; Eisner W                | 2008 | Modern erosion rates and loss of coastal features and sites, Beaufort sea coastline, Alaska                                                 | Alaska; Arctic; Beaufort Sea Coastline; Coastal Erosion; Shoreline Analysis                                                                          | 58 | Arctic                                                                              | NA                           |
| 1175 | Goncalves R; Krueger C; Heck B; Awange J; Cortes J | 2009 | Gps assessment of shoreline extraction using high resolution images                                                                         | Coastal Erosion; GPS; High Resolution Image; Shoreline                                                                                               | 0  | Proceedings, 33rd International Symposium Remote Sensing of Environment, Isrse 2009 | NA                           |
| 1176 | El-Nahry A; Doluschitz R                           | 2009 | Climate change and its impacts the coastal zone of the Nile delta, Egypt                                                                    | Climate Change; Erosion; RS and GIS; Sea Level Rise; The Nile Delta                                                                                  | 0  | Proceedings, 33rd International Symposium Remote Sensing of Environment, Isrse 2009 | NA                           |
| 1177 | Taveira-Pinto F; Pais-Barbosa J; Veloso-Gomes F    | 2009 | Coastline evolution at Esmoriz-Furadouro stretch (Portugal)                                                                                 | Coastal Zone; Coastline Change; Retreat; Urban Areas                                                                                                 | 5  | Journal of Coastal Research                                                         | NA                           |
| 1178 | Harris M; Wright E; Fuqua L; Tinker T              | 2009 | Comparison of shoreline erosion rates derived from multiple data types data compilation for legislated setback lines in South Carolina, USA | Coastal Erosion; Coastal Policy; DSAS; Pmas; Shoreline Change                                                                                        | 9  | Journal of Coastal Research                                                         | NA                           |
| 1179 | Conti M; Cappucci S; La M G                        | 2009 | Sediment dynamics of nourished sandy beaches dinamica sedimentaria di spiagge protette mediante ripascimento                                | Beach Nourishment; Littoral-Protection; Monitoring; Shoreline                                                                                        | 6  | Rendiconti online Societa Geologica Italiana                                        | NA                           |



|      |                                         |      |                                                                                                                                                                                                                                                                                                            |                                                                                                 |    |                                                          |                             |
|------|-----------------------------------------|------|------------------------------------------------------------------------------------------------------------------------------------------------------------------------------------------------------------------------------------------------------------------------------------------------------------|-------------------------------------------------------------------------------------------------|----|----------------------------------------------------------|-----------------------------|
| 1180 | Samaras A; Koutitas C                   | 2009 | The impact of catchment management on coastal morphology: the case of Fourka in Greece                                                                                                                                                                                                                     | Catchment Management; Land Cover Changes; Numerical Modeling; Shoreline Change                  | 7  | Journal of Coastal Research                              | NA                          |
| 1181 | Batista E; Souza F P; Da S O            | 2009 | Evaluation of depositional and erosional areas on cables muddy coastal zone Amazon through the analysis of multitemporal remote sensing imagery<br>avaliação de áreas deposicionais e erosivas em cabos lamosos da zona costeira amazônica através da análise multitemporal de imagens de sensores remotos | Amapá; Amazon; Mangrove; Mud Cape; Shoreline Changes                                            | 9  | Revista Brasileira De Geofisica                          | NA                          |
| 1182 | Yang J; Seo D; Lim H; Cho C             | 2009 | An analysis of coastal topography and land cover changes at haeundae beach, South Korea                                                                                                                                                                                                                    | Aerial Photograph; Coastal Erosion; Coastline; Land Cover Map; Soil Loss                        | 0  | 60th International Astronautical Congress 2009, IAC 2009 | NA                          |
| 1183 | Hansen J; Barnard P                     | 2009 | The observed relationship between wave conditions and beach response ocean beach San Francisco, CA                                                                                                                                                                                                         | Beaches; Shorelines; Storm Response; Wave Conditions                                            | 4  | Journal of Coastal Research                              | NA                          |
| 1184 | Frihy O; Moufaddal W; Gindy A; Deabes E | 2009 | Comparison of annual rates of beach changes determined from land survey and remote sensing techniques along the coastline of the Nile delta, Egypt                                                                                                                                                         | and Sediment Transport; Beach Morphodynamics; Littoral Cells; Remote Sensing; Shoreline Changes | 1  | International Journal of Ecology and Development         | NA                          |
| 1185 | Pires A; Gomes A; Chaminé H             | 2009 | Dynamics of coastal systems using GIS analysis and geomaterials evaluation for groins                                                                                                                                                                                                                      | Coastal Dynamics; Coastal Geoengineering; Geomaterials; GIS; Hydraulic Structures               | 10 | Environmental and Engineering Geoscience                 | 10.2113/gseegeosci.15.4.245 |

|      |                                                                                        |      |                                                                                                                                                                           |                                                                                                                             |     |                                                           |                                  |
|------|----------------------------------------------------------------------------------------|------|---------------------------------------------------------------------------------------------------------------------------------------------------------------------------|-----------------------------------------------------------------------------------------------------------------------------|-----|-----------------------------------------------------------|----------------------------------|
| 1186 | Banna M; Hereher M                                                                     | 2009 | Detecting temporal shoreline changes and erosion accretion rates using remote sensing and their associated sediment characteristics along the coast of north Sinai, Egypt | Egypt; El Arish Harbour; El Bardawil Inlet; Landsat Images; Mediterranean Sea; North Sinai; Rafah                           | 23  | Environmental Geology                                     | 10.1007/s00254-008-1644-y        |
| 1187 | Kumar A; Jayappa K                                                                     | 2009 | Long and short-term shoreline changes along Mangalore coast, India                                                                                                        | Anthropogenic Activities; Beach Erosion; Natural Processes; Shoreline Changes                                               | 38  | International Journal of Environmental Research           | NA                               |
| 1188 | Brock J; Purkis S                                                                      | 2009 | The emerging role of Lidar remote sensing in coastal research and resource management                                                                                     | Benthic Habitats; Coastal Mapping; Dune Vegetation; Laser Altimetry; LIDAR; Remote Sensing; Shoreline Change; Storm Hazards | 131 | Journal of Coastal Research                               | 10.2112/SI53-001.1               |
| 1189 | Heo J; Kim J; Kim J                                                                    | 2009 | A new methodology for measuring coastline recession using buffering and nonlinear least squares estimation                                                                | Buffering Method; Coastline Recession; Non-Linear Least Squares; Shoreline Change                                           | 15  | International Journal of Geographical Information Science | 10.1080/13658810802035642        |
| 1190 | Dwarakish G; Vinay S; Natesan U; Asano T; Kakinuma T; Venkataramana K; Pai B; Babita M | 2009 | Coastal vulnerability assessment of the future sea level rise in Udupi coastal zone of Karnataka State west coast of India                                                | NA                                                                                                                          | 98  | Ocean and Coastal Management                              | 10.1016/j.ocecoaman.2009.07.007  |
| 1191 | Wang Y; Liao M; Wang C                                                                 | 2009 | Applications and analyses of satellite borne l band synthetic aperture radar data in coastal environments                                                                 | NA                                                                                                                          | 1   | Geography Compass                                         | 10.1111/j.1749-8198.2009.00254.x |
| 1192 | Sridhar R; Elangovan K; Suresh P                                                       | 2009 | Long term shoreline oscillation and changes of Cauvery delta coastline inferred from satellite imageries                                                                  | IRS Satellite Data; Shoreline Oscillation                                                                                   | 13  | Journal of The Indian Society of Remote Sensing           | 10.1007/s12524-009-0013-y        |

|      |                                                         |      |                                                                                                                                                                                             |                                                                                                                                                      |     |                                       |                                    |
|------|---------------------------------------------------------|------|---------------------------------------------------------------------------------------------------------------------------------------------------------------------------------------------|------------------------------------------------------------------------------------------------------------------------------------------------------|-----|---------------------------------------|------------------------------------|
| 1193 | Murali R; Shrivastava D; Vethamony P                    | 2009 | Monitoring shoreline environment of Paradip east coast of India using remote sensing                                                                                                        | Accretion; Erosion; Geomorphology; Remote Sensing; Shoreline Changes                                                                                 | 28  | Current Science                       | NA                                 |
| 1194 | Rocha C; Araújo T; Mendonça F                           | 2009 | Methodology for location of shorelines using 3DGPS positioning: a case study at Sauaçui beach northeast Brazil                                                                              | Brazil; Datum; Ellipsoid; Geoid; HWL; Identification of Shorelines; Run-Up; Vertical Data                                                            | 2   | Journal of Coastal Research           | 10.2112/08-1108.1                  |
| 1195 | Archetti R                                              | 2009 | Quantifying the evolution of a beach protected by low crested structures using video monitoring                                                                                             | Coastal Erosion; Coastal Evolution; Low Crested Structures; Video Monitoring                                                                         | 23  | Journal of Coastal Research           | 10.2112/07-0994.1                  |
| 1196 | Pearre N; Puleo J                                       | 2009 | Quantifying seasonal shoreline variability at Rehoboth beach Delaware using automated imaging techniques                                                                                    | Erosion; Groin; Nourishment Evolution; Remote Sensing; Video                                                                                         | 38  | Journal of Coastal Research           | 10.2112/08-1029.1                  |
| 1197 | Houser C; Hamilton S                                    | 2009 | Sensitivity of post-hurricane beach and dune recovery to event frequency                                                                                                                    | Dune Recovery; Hurricane Recovery; Santa Rosa Island                                                                                                 | 103 | Earth Surface Processes and Landforms | 10.1002/esp.1730                   |
| 1198 | Parcharidis I; Pavlopoulos K; Poscolieri M; Kourkouli P | 2009 | Using time series of satellite earth's observation data to determine geomorphological and paleogeographical changes at the south eastern coastal areas of Gokceada (Imvros) island (Turkey) | NA                                                                                                                                                   | 0   | Zeitschrift Fur Geomorphologie        | 10.1127/0372-8854/2009/0053S1-0139 |
| 1199 | Kaiser M                                                | 2009 | Environmental changes remote sensing and infrastructure development the case of Egypt's east port Said harbour                                                                              | El-Tina Coastal Zone; Engineering Structures; Environmental Changes; Erosion; Multispectral Image Classification; Remote Sensing and Vector Analyses | 27  | Applied Geography                     | 10.1016/j.apgeog.2008.09.008       |

|      |                                                           |      |                                                                                                            |                                                                                                                                     |     |                                                                                                                              |                               |
|------|-----------------------------------------------------------|------|------------------------------------------------------------------------------------------------------------|-------------------------------------------------------------------------------------------------------------------------------------|-----|------------------------------------------------------------------------------------------------------------------------------|-------------------------------|
| 1200 | Liou J; Chang H; Chen W; Liaw S                           | 2009 | Beach erosion and preventive countermeasure at Kangnan coast, Taiwan                                       | Bathymetric Variation; Groin Effect; Sediment Transport; Shoreline Evolution                                                        | 5   | Journal of Coastal Research                                                                                                  | 10.2112/07-0950.1             |
| 1201 | Jones B; Arp C; Jorgenson M; Hinkel K; Schmutz J; Flint P | 2009 | Increase in the rate and uniformity of coastline erosion in Arctic, Alaska                                 | NA                                                                                                                                  | 212 | Geophysical Research Letters                                                                                                 | 10.1029/2008GL036205          |
| 1202 | Maiti S; Bhattacharya A                                   | 2009 | Shoreline change analysis and its application to prediction a remote sensing and statistics based approach | Geomorphological Evidences; Regression Coefficient (R2); Root Mean Square Error (RMSE); Shoreline Change Rate; Shoreline Prediction | 194 | Marine Geology                                                                                                               | 10.1016/j.margeo.2008.10.006  |
| 1203 | Alves A                                                   | 2009 | Long-term erosional hot spots in the southern Brazilian coast                                              | NA                                                                                                                                  | 8   | Journal of Geophysical Research: Oceans                                                                                      | 10.1029/2008JC004933          |
| 1204 | Sasaki M; Takeuchi T                                      | 2009 | Shoreline changes around artificial headlands along the Misawa coast, Japan                                | Artificial Headland; Beach Erosion; Coastal Sand Drift; Dominant; Shoreline Advancement; Shoreline Retreat                          | 0   | Advances In Water Resources and Hydraulic Engineering - Proceedings of 16th Iahr-Apd Congress and 3rd Symposium of IAHR-ISHS | 10.1007/978-3-540-89465-0_223 |
| 1205 | De A A; Masselink G; Kingston K; Williams J; Buscombe D   | 2009 | Monitoring storm impacts on a gravel beach using the Argus video system                                    | NA                                                                                                                                  | 1   | Proceedings of The Coastal Engineering Conference                                                                            | 10.1142/9789814277426_0217    |

|      |                                                 |      |                                                                                                                                                                                                                                                                                                                                                                                         |                                                                                                                          |   |                                                                                                                              |                               |
|------|-------------------------------------------------|------|-----------------------------------------------------------------------------------------------------------------------------------------------------------------------------------------------------------------------------------------------------------------------------------------------------------------------------------------------------------------------------------------|--------------------------------------------------------------------------------------------------------------------------|---|------------------------------------------------------------------------------------------------------------------------------|-------------------------------|
| 1206 | Natesan U                                       | 2009 | Shoreline dynamics of Dhanushkodi Rameswaram using GIS                                                                                                                                                                                                                                                                                                                                  | Beach Slope; Rameswaram; Satellite Data; Sediment Transport; Shoreline Changes                                           | 2 | Advances In Water Resources and Hydraulic Engineering - Proceedings of 16th Iahr-Apd Congress and 3rd Symposium of IAHR-ISHS | 10.1007/978-3-540-89465-0_226 |
| 1207 | Kawakubo F                                      | 2009 | Coastline change assessment at Ribeira de Iguape outlet and Barra do Icapara lagoonal mouth southern coastal region of the state of São Paulo, Brazil using Landsat MSS, TM, and ETM images avaliação das mudanças na linha de costa na foz do rio ribeira de iguapedesembocaura lagunar da barra do icapara litoral sul de São Paulo brasil utilizando dados do Landsat MSS, TM, e ETM | Change Detection; Classification by Region; Coastal Dynamic; Fraction Images; Geomorphic Features; Multitemporal Landsat | 4 | Investigaciones Geograficas                                                                                                  | NA                            |
| 1208 | Sallenger A; Wright C; Doran K; Guy K; Morgan K | 2009 | Hurricane Rita and the destruction of Holly beach Louisiana why the chenier plain is vulnerable to storms                                                                                                                                                                                                                                                                               | NA                                                                                                                       | 1 | Special Paper of The Geological Society of America                                                                           | 10.1130/2009.2460(09)         |
| 1209 | Glen G; Campbell J; Kennedy L                   | 2009 | Fifty-one years of shoreline change at little lagoon Alabama                                                                                                                                                                                                                                                                                                                            | Lagoons; Overwash Fans; Shoreline Change; Sliver Polygons; Tidal Inlets                                                  | 1 | Southeastern Geographer                                                                                                      | 10.1353/sgo.0.0037            |
| 1210 | Chusrinuan N; Tanavud C; Yongchalermchai C      | 2009 | Impacts of shoreline erosion on coastal ecosystems in Songkhla province                                                                                                                                                                                                                                                                                                                 | Accretion; GIS; Prevention and Mitigation Measures; Shoreline Erosion; Songkhla Province                                 | 1 | Songklanakarin Journal of Science and Technology                                                                             | NA                            |

|      |                                                     |      |                                                                                                                                           |                                                                                                                                                          |    |                                                                                            |                           |
|------|-----------------------------------------------------|------|-------------------------------------------------------------------------------------------------------------------------------------------|----------------------------------------------------------------------------------------------------------------------------------------------------------|----|--------------------------------------------------------------------------------------------|---------------------------|
| 1211 | Sesli F; Karsli F; Colkesen I; Akyol N              | 2009 | Monitoring the changing position of coastlines using aerial and satellite image data an example from the eastern coast of Trabzon, Turkey | Coastal Area; Coastal Land Use; Coastal Management; Environment; Photogrammetry; Remote Sensing                                                          | 47 | Environmental Monitoring and Assessment                                                    | 10.1007/s10661-008-0366-7 |
| 2123 | Ruggiero P; Lists J                                 | 2009 | Improving accuracy and statistical reliability of shoreline position and change rate estimates                                            | California; Pacific Northwest; High Waterline; LIDAR; Mean High Water; Shoreline Change Rate; Shoreline Position Uncertainty; Weighted Linear Regression | 40 | Journal of Coastal Research                                                                | 10.2112/08-1051.1         |
| 2124 | Delgado-Fernandez I; Davidson-Arnott R; Ollerhead J | 2009 | Application of a remote sensing technique to the study of coastal dunes                                                                   | Beach Surface Moisture; Image Rectification; Eolian Sediment Transport; Foredune Evolution; Digital Photography; Geodatabase; Mesoscale Monitoring       | 39 | Journal of Coastal Research                                                                | 10.2112/09-1182.1         |
| 2133 | Gaston B; Ajayi O                                   | 2009 | GIS based shoreline change detection along the Cameroon coast towards disaster risk reduction and management                              | Shoreline Changes; Shoreline Change Detection; Disaster Risk Reduction; Natural Disaster Management; GIS Applications                                    | 0  | Environmental Vibrations: Prediction, Monitoring, Mitigation and Evaluation, Vols I and II | NA                        |
| 2134 | Rihouey D; Dailloux D; Nader J; Morichon D          | 2009 | Mapping intertidal topography from video measurements                                                                                     | NA                                                                                                                                                       | 0  | Houille Blanche-<br>Revue<br>Internationale De L<br>Eau                                    | 10.1051/lhb/2009011       |

|      |                                                               |      |                                                                                                                                              |                                                                               |    |                                                                                                                               |                              |
|------|---------------------------------------------------------------|------|----------------------------------------------------------------------------------------------------------------------------------------------|-------------------------------------------------------------------------------|----|-------------------------------------------------------------------------------------------------------------------------------|------------------------------|
| 1135 | Cui B; Li X; Chang X; Yi W; Wang L                            | 2010 | Remote sensing monitoring of coastline change in the Yellow river estuary 1976-2005                                                          | Accretion-Erosion; Coastline; Remote Sensing; The Yellow River Delta          | 2  | Proceedings - 2010 3rd International Congress on Image and Signal Processing, Cisp 2010                                       | 10.1109/CISP.2010.5647965    |
| 1136 | Manno G; Lo R C; Ciraolo G; Maltese A                         | 2010 | Coupling a hydro-maritime model and remotely sensed techniques to assess the shoreline positioning uncertainty: the Marsala coast study case | Coast; Sandy Beach; Shoreline Motion; Tides; Waves Run-Up                     | 0  | Proceedings of Spie - The International Society For Optical Engineering                                                       | 10.1117/12.865000            |
| 1137 | Elfrink B                                                     | 2010 | Setback lines for pipeline landfalls and coastal infrastructure                                                                              | NA                                                                            | 0  | Brazilian Petroleum, Gas and Biofuels Institute [Ibp] Rio Oil and Gas Conference (Rio De Janeiro, Brazil, 9/13-16/2010) Techn | NA                           |
| 1138 | Hoa D; Ai T                                                   | 2010 | Integraton multitemporal remote sensing data and bathymetric data for studying shoreline change in Ba Lat estuary Thai Binh, province        | Ba Lat Estuary; Bathymetric Data; Shoreline Change                            | 0  | 31st Asian Conference on Remote Sensing 2010, ACRS 2010                                                                       | NA                           |
| 1139 | Nguyen H; Pullar D; Duke N; Mcalpine C; Nguyen H; Johansen. K | 2010 | Historic shoreline changes an indicator of coastal vulnerability for human land use and development in Kien Gang, Vietnam                    | Accretion; Coastal Vulnerability Assessments; Erosion; Shoreline Positions    | 7  | 31st Asian Conference on Remote Sensing 2010, ACRS 2010                                                                       | NA                           |
| 1140 | Rasuly A; Naghdifar R; Rasoli M                               | 2010 | Monitoring of Caspian sea coastline changes using object-oriented techniques                                                                 | Caspian Sea; Coastal Changes; Object-Oriented Techniques; Satellite Imageries | 46 | Procedia Environmental Sciences                                                                                               | 10.1016/j.proenv.2010.10.046 |

|      |                                        |      |                                                                                                                                                                 |                                                                                                                    |     |                                            |                                  |
|------|----------------------------------------|------|-----------------------------------------------------------------------------------------------------------------------------------------------------------------|--------------------------------------------------------------------------------------------------------------------|-----|--------------------------------------------|----------------------------------|
| 1141 | Brooks S; Spencer T                    | 2010 | Temporal and spatial variations in recession rates and sediment release from soft rock cliffs Suffolk coast, UK                                                 | ArcMap; Coastal Management; Digital Shoreline Analysis System (DSAS); NextMap; Sediment Release; Shoreline Retreat | 60  | Geomorphology                              | 10.1016/j.geomorph.2010.08.005   |
| 1142 | Rodrigo M; Coelho L; Krueger C; Heck B | 2010 | Shoreline predictive modeling using Artificial Neural Networks modelagem preditiva de linha de costa utilizando redes neurais artificiais                       | Artificial Neural Network; Coastal Mapping; Prediction Models; Shoreline                                           | 7   | Boletim De Ciencias Geodesicas             | NA                               |
| 1143 | Hansen J; Barnard P                    | 2010 | Sub-weekly to interannual variability of a high-energy shoreline                                                                                                | Beach Processes; Eof; GPS Surveying; NearShore Bathymetry; Storm Response                                          | 60  | Coastal Engineering                        | 10.1016/j.coastaleng.2010.05.011 |
| 1144 | Kurt S; Karaburun A; Demirci A         | 2010 | Coastline changes in Istanbul between 1987 and 2007                                                                                                             | Coastline; Coastline Change; Istanbul; Remote Sensing                                                              | 22  | Scientific Research and Essays             | NA                               |
| 1145 | Sesli F                                | 2010 | Mapping and monitoring temporal changes for coastline and coastal area by using aerial data images and digital photogrammetry: a case study from Samsun, Turkey | Aerial Photos; Coast; Coastal Area; Coastal Mapping; Coastline; Digital Photogrammetry                             | 17  | International Journal of Physical Sciences | NA                               |
| 1146 | Li X; Damen M                          | 2010 | Coastline change detection with satellite remote sensing for environmental management of the Pearl river estuary China                                          | Coastline Change; Environmental Impact; Pearl River Estuary; Remote Sensing                                        | 109 | Journal of Marine Systems                  | 10.1016/j.jmarsys.2010.02.005    |
| 1147 | Kuleli T                               | 2010 | Quantitative analysis of shoreline changes at the Mediterranean coast in Turkey                                                                                 | Change Detection; Coastline; Cukurova Delta; DSAS; Landsat                                                         | 85  | Environmental Monitoring and Assessment    | 10.1007/s10661-009-1057-8        |
| 1148 | Waythomas C; Scott W; Nye C            | 2010 | The geomorphology of an Aleutian volcano following a major eruption the 78 august 2008 eruption of Kasatochi volcano Alaska and its aftermath                   | NA                                                                                                                 | 17  | Arctic, Antarctic, and Alpine Research     | 10.1657/1938-4246-42.3.260       |



|      |                                                                                         |      |                                                                                                                                       |                                                                                                                             |    |                                         |                                 |
|------|-----------------------------------------------------------------------------------------|------|---------------------------------------------------------------------------------------------------------------------------------------|-----------------------------------------------------------------------------------------------------------------------------|----|-----------------------------------------|---------------------------------|
| 1149 | Kumar A; Narayana A; Jayappa K                                                          | 2010 | Shoreline changes and morphology of spits along southern Karnataka west coast of India a remote sensing and statistics based approach | Anthropogenic Intervention; Regression Coefficient; Remote Sensing; Shoreline Changes; Spit Morphology; West Coast of India | 78 | Geomorphology                           | 10.1016/j.geomorph.2010.02.023  |
| 1150 | Niang I; Dansokho M; Faye S; Gueye K; Ndiaye P                                          | 2010 | Impacts of climate change on the Senegalese coastal zones: examples of the Cap Vert Peninsula and Saloum estuary                      | Adaptation; Climate Change; Coastal Erosion; Inundation; Saltwater Intrusion; Sea Level Rise; Senegal                       | 19 | Global and Planetary Change             | 10.1016/j.gloplacha.2010.01.005 |
| 1151 | Dawson J; Smithers S                                                                    | 2010 | Shoreline and beach volume change between 1967 and 2007 at Raine island Great Barrier Reef, Australia                                 | Erosion; GIS; Great Barrier Reef; Raine Island; Sand Cay; Sediment Transport                                                | 64 | Global and Planetary Change             | 10.1016/j.gloplacha.2010.01.026 |
| 1152 | Jabaloy-Sánchez A; Lobo F; Azor A; Bárcenas P; Fernández-Salas L; Del R V; Pérez-Peña J | 2010 | Human-driven coastline changes in the Adra river deltaic system southeast Spain                                                       | Bathymetry; Coastline Changes; Damming; Delta; GIS; River Deviation                                                         | 54 | Geomorphology                           | 10.1016/j.geomorph.2010.02.004  |
| 1153 | Durduran S                                                                              | 2010 | Coastline change assessment on water reservoirs located in the konya basin area Turkey using multitemporal Landsat imagery            | Coastline Change; Image Processing; Konya Basin; Multitemporal Image Data; Reservoirs                                       | 35 | Environmental Monitoring and Assessment | 10.1007/s10661-009-0906-9       |
| 1154 | Shu Y; Li J; Gomes G                                                                    | 2010 | Shoreline extraction from Radarsat-2 intensity imagery using a narrow band level set segmentation approach                            | Level Set Segmentation; Narrow Band; RadaRSat-2; Shoreline Mapping                                                          | 44 | Marine Geodesy                          | 10.1080/01490419.2010.496681    |
| 1155 | Mohd D M; Rasouli A                                                                     | 2010 | Application of the object-oriented technique to monitor coastline changes: case study Caspian sea                                     | Caspian Sea; Coastal Changes Monitoring; Ecognition Software; Object-Oriented Techniques; Satellite Imageries               | 2  | Disaster Advances                       | NA                              |

|      |                                                                |      |                                                                                                                                |                                                                                                                    |    |                                                                                                                |                                |
|------|----------------------------------------------------------------|------|--------------------------------------------------------------------------------------------------------------------------------|--------------------------------------------------------------------------------------------------------------------|----|----------------------------------------------------------------------------------------------------------------|--------------------------------|
| 1156 | Li X; Zhou Y; Kuang R                                          | 2010 | Analysis and trend prediction of shoreline evolution in Chongming Dongtan, Shanghai                                            | GIS; Graphics Based Method; Remote Sensing; Shoreline Evolution; Trend Prediction                                  | 7  | Jilin Daxue Xuebao (Diqu Kexue Ban)/Journal of Jilin University (Earth Science Edition)                        | NA                             |
| 1157 | Mathew S; Davidson-Arnott R; Ollerhead J                       | 2010 | Evolution of a beach-dune system following a catastrophic storm overwash event: Greenwich dunes Prince Edward Island 1936-2005 | NA                                                                                                                 | 55 | Canadian Journal of Earth Sciences                                                                             | 10.1139/E09-078                |
| 1158 | Sener E; Davraz A; Sener S                                     | 2010 | Investigation of Aksehir and Eber lakes SW Turkey coastline change with multitemporal satellite images                         | Aksehir Lake; Coastline Change; Hydrology; Remote Sensing                                                          | 29 | Water Resources Management                                                                                     | 10.1007/s11269-009-9467-5      |
| 1159 | Vilmundardóttir O; Magnússon B; Gísladóttir G; Thorsteinsson T | 2010 | Shoreline erosion and aeolian deposition along a recently formed hydroelectric reservoir Blöndulón Iceland                     | Aeolian Deposit; Bluff Erosion Rate; Fetch Length; Hydro-Electric Reservoir; Iceland; Shore Morphology; Wave Power | 24 | Geomorphology                                                                                                  | 10.1016/j.geomorph.2009.08.012 |
| 1160 | Urbanski J                                                     | 2010 | The extraction of coastline using OBIA and GIS                                                                                 | Coastline; GIS; OBIA                                                                                               | 8  | International Archives of The Photogrammetry, Remote Sensing and Spatial Information Sciences - ISPRS Archives | NA                             |

|      |                                                                                |      |                                                                                                                     |                                                                                                     |    |                                                                                                                                     |    |
|------|--------------------------------------------------------------------------------|------|---------------------------------------------------------------------------------------------------------------------|-----------------------------------------------------------------------------------------------------|----|-------------------------------------------------------------------------------------------------------------------------------------|----|
| 1161 | Raju D; Santosh K;<br>Chandrasekar J; Tiong-Sa<br>T                            | 2010 | Coastline change measurement<br>and generating risk map for the<br>coast using geographic<br>information system     | Chart Datum;<br>Coastline;<br>Geographic<br>Information System;<br>Risk Map                         | 6  | International<br>Archives of The<br>Photogrammetry,<br>Remote Sensing<br>and Spatial<br>Information<br>Sciences - ISPRS<br>Archives | NA |
| 1162 | Nguyen L; Minh N; Thy P;<br>Phung H; Van H                                     | 2010 | Analysis of changes in the<br>riverbanks of Mekong river<br>Vietnam by using multitemporal<br>remote sensing data   | Change; Linear<br>Regression; Remote<br>Sensing; Riverbank                                          | 8  | International<br>Archives of The<br>Photogrammetry,<br>Remote Sensing<br>and Spatial<br>Information<br>Sciences - ISPRS<br>Archives | NA |
| 1163 | Aguilar F; Fernández I;<br>Pérez J; López A; Aguilar<br>M; Mozas A; Cardenal J | 2010 | Preliminary results on high<br>accuracy estimation of shoreline<br>change rate based on coastal<br>elevation models | Change Detection;<br>Coast; DEM/DTM;<br>LIDAR; Mapping;<br>Monitoring;<br>Shoreline                 | 10 | International<br>Archives of The<br>Photogrammetry,<br>Remote Sensing<br>and Spatial<br>Information<br>Sciences - ISPRS<br>Archives | NA |
| 1164 | Siripong A                                                                     | 2010 | Detect the coastline changes in<br>Thailand by remote sensing                                                       | Coastal Erosion;<br>Coastline Change;<br>Remote Sensing;<br>Thai Coast; Thai<br>Coastal Development | 10 | International<br>Archives of The<br>Photogrammetry,<br>Remote Sensing<br>and Spatial<br>Information<br>Sciences - ISPRS<br>Archives | NA |

|      |                                      |      |                                                                                                                                                                                                                                                       |                                                                                                    |    |                                                                |                             |
|------|--------------------------------------|------|-------------------------------------------------------------------------------------------------------------------------------------------------------------------------------------------------------------------------------------------------------|----------------------------------------------------------------------------------------------------|----|----------------------------------------------------------------|-----------------------------|
| 1165 | El-Deen T L; Elbeih S                | 2010 | Investigation of fusion of SAR and Landsat data for shoreline super resolution mapping the northeastern Mediterranean sea coast in Egypt                                                                                                              | Fuzzy Classifier; Image Fusion; SAR; Shoreline Extraction; Speckle Noise; Super Resolution Mapping | 19 | Applied Geomatics                                              | 10.1007/s12518-010-0033-x   |
| 1166 | Kang Y; Ding X; Cheng L; Zhang J     | 2010 | Coastline changes in Vancheng since 6000 years ago based on remote sensing image dodging                                                                                                                                                              | Ancient Coast; Coastal Plain; Remote Sensing Image Dodging; Sand Hills and Silt Flats; Yancheng    | 5  | Dili Xuebao/Acta Geographica Sinica                            | NA                          |
| 1167 | Qiao C; Luo J; Sheng Y; Shen Z; Li J | 2010 | Lake shrinkage analysis using spectral-spatial coupled remote sensing on Tibetan plateau                                                                                                                                                              | Lake Extraction; Remote Sensing; Shoreline Detection; Tibetan Plateau                              | 6  | International Geoscience and Remote Sensing Symposium (IGARSS) | 10.1109/IGARSS.2010.5653706 |
| 1168 | Gao Y; Su F; Sun X; Xue Z; He Y      | 2010 | A study on spatial and temporal variations of coastal wetland in Pearl river estuary                                                                                                                                                                  | Centroid Displacement; Coastal Wetlands; Dynamic Degree; Pearl River Estuary                       | 5  | International Geoscience and Remote Sensing Symposium (IGARSS) | 10.1109/IGARSS.2010.5651648 |
| 1169 | Wang C; Zhang J; Ma Y                | 2010 | Coastline interpretation from multispectral remote sensing images using an association rule algorithm                                                                                                                                                 | NA                                                                                                 | 22 | International Journal of Remote Sensing                        | 10.1080/01431160903413739   |
| 1170 | Jolicoeur S; GiangIOPpi M; Bérubé D  | 2010 | Response of Bouctouche spit New Brunswick Canada to relative sea-level rise and storms from 1944 to 2000 réponses de la flèche littorale de bouctouche nouveauBrunswick Canada à la hausse du niveau marin relatif et aux tempêtes entre 1944 et 2000 | Relative Sea-Level Rise; Sand Spit; Sediment Budget; Storm Deltas; Storms; WashoverRS              | 6  | Geomorphologie: Relief, Processus, Environnement               | 10.4000/geomorphologie.7839 |
| 1171 | Liguori V; Porcaro A                 | 2010 | Coastal erosion in the archaeological area of Selinunte                                                                                                                                                                                               | Coastal Erosion; Geomorphology; Sea-Level Change                                                   | 1  | Wit Transactions on Ecology and The Environment                | 10.2495/ISLANDS100131       |

|      |                                                             |      |                                                                                                                                                              |                                                                                                                                                                                       |    |                                                      |                                    |
|------|-------------------------------------------------------------|------|--------------------------------------------------------------------------------------------------------------------------------------------------------------|---------------------------------------------------------------------------------------------------------------------------------------------------------------------------------------|----|------------------------------------------------------|------------------------------------|
| 1172 | Robinson M; Alexander C;<br>Jackson C; McCabe C;<br>Crass D | 2010 | Threatened archaeological<br>historic and cultural resources of<br>the Georgia coast identification<br>prioritization and management<br>using GIS technology | NA                                                                                                                                                                                    | 38 | Geoarchaeology                                       | 10.1002/gea.20309                  |
| 1173 | Danchuk S; Willson C                                        | 2010 | Effects of shoreline sensitivity on<br>oil spill trajectory modeling of<br>the lower Mississippi river                                                       | Environmental<br>Sensitivity Index<br>Mapping; Oil Spill<br>Modeling; Shoreline<br>Oil Interactions;<br>Shoreline Retention;<br>Shoreline Sensitivity                                 | 18 | Environmental<br>Science and<br>Pollution Research   | 10.1007/s11356-009-0159-8          |
| 1174 | Komar P                                                     | 2010 | Shoreline evolution and<br>management of Hawkes Bay<br>New Zealand tectonics coastal<br>processes and human impacts                                          | BreakwaterRS;<br>Gravel Beaches;<br>Jetties; River<br>WaterSheds;<br>Sediment Budgets;<br>Wave Climates                                                                               | 30 | Journal of Coastal<br>Research                       | 10.2112/08-1079.1                  |
| 2094 | Marghany M; Hashim M                                        | 2010 | Velocity bunching and canny<br>algorithms for modelling<br>shoreline change rate from<br>synthetic aperture radar (SAR)                                      | Synthetic Aperture<br>Radar (SAR);<br>Shoreline; Velocity<br>Bunching; Partial<br>Differential Equation<br>(PDF)                                                                      | 5  | International<br>Journal of The<br>Physical Sciences | NA                                 |
| 2097 | Cowart L; Walsh J; Corbett<br>D                             | 2010 | Analyzing estuarine shoreline<br>change: a case study of Cedar<br>island, North Carolina                                                                     | Erosion; Fetch;<br>Shoreline<br>Composition;<br>Endpoint Rate;<br>Transect                                                                                                            | 28 | Journal of Coastal<br>Research                       | 10.2112/JCOASTRES-D-09-<br>00117.1 |
| 2101 | Ruggiero P; Buijsman M;<br>Kaminsky G; Gelfenbaum<br>G      | 2010 | Modeling the effects of wave<br>climate and sediment supply<br>variability on large-scale<br>shoreline change                                                | Shoreline Modeling;<br>Shoreline Change;<br>Longshore Transport;<br>Climate Variability;<br>Sediment Budget;<br>Washington State;<br>Oregon State;<br>Columbia River<br>Littoral Cell | 54 | Marine Geology                                       | 10.1016/j.margeo.2010.02.008       |

|      |                                                                 |      |                                                                                                                           |                                                                                           |     |                                                                                                   |                                 |
|------|-----------------------------------------------------------------|------|---------------------------------------------------------------------------------------------------------------------------|-------------------------------------------------------------------------------------------|-----|---------------------------------------------------------------------------------------------------|---------------------------------|
| 2102 | Rao K; Subraelu P; Kumar K; Demudu G; Malini B; Rajawat A; Ajai | 2010 | Impacts of sediment retention by dams on delta shoreline recession: evidences from the Krishna and Godavari deltas, India | Shoreline Changes and Sedimentation; Coastal Erosion; Krishna-Godavari Deltas             | 37  | Earth Surface Processes and Landforms                                                             | 10.1002/esp.1977                |
| 2110 | Goncalves R; Coelho L; Krueger C; Heck B                        | 2010 | Shoreline predictive modeling using Artificial Neural Networks                                                            | Coastal Mapping; Artificial Neural Network; Prediction Models; Shoreline                  | 5   | Boletim De Ciencias Geodesicas                                                                    | 10.1590/S1982-21702010000300004 |
| 2111 | Jie D; Zhang J; Wang L                                          | 2010 | Research on the stability for north shoreline of Liaodong Bay                                                             | Shoreline Changes; Remote Sensing; Water Extraction; Stability; North of The Liaodong Bay | 1   | Chinese Perspective on Risk Analysis and Crisis Response                                          | NA                              |
| 2112 | Jolicoeur S; Giangioppi M; Berube D                             | 2010 | Response of bouctouche spit New Brunswick Canada to relative sea-level rise and storms from 1944 to 2000                  | Sediment Budget; Relative Sea-Level Rise; Storms; Sand Spit; Washovers; Storm Deltas      | 5   | Geomorphologie-Relief Processus Environnement                                                     | NA                              |
| 2113 | Gens R                                                          | 2010 | Remote sensing of coastlines detection extraction and monitoring                                                          | NA                                                                                        | 124 | International Journal of Remote Sensing                                                           | 10.1080/01431160902926673       |
| 1072 | Güner H; Yüksel Y; Çevik E                                      | 2011 | Determination of shoreline evolution: A case study                                                                        | Case Studies; Shoreline Changes; Turkey                                                   | 1   | Coastal Engineering Practice - Proceedings of The 2011 Conference on Coastal Engineering Practice | 10.1061/41190(422)60            |
| 1073 | Al F A; Billa L; Pradhan B                                      | 2011 | Semiautomated procedures for shoreline extraction using single Radarsat-1 SAR image                                       | Coasts; Erosion Features; Imagery; Kuala Terengganu; Remote Sensing                       | 52  | Estuarine, Coastal and Shelf Science                                                              | 10.1016/j.ecss.2011.10.009      |
| 1074 | Rahman A; Dragoni D; El-Masri B                                 | 2011 | Response of the Sundarbans coastline to sea level rise and decreased sediment flow: A remote sensing assessment           | Accretion; Bengal Delta; Coastline Dynamics; Erosion;                                     | 102 | Remote Sensing of Environment                                                                     | 10.1016/j.rse.2011.06.019       |

|      |                                                |      |                                                                                                          |                                                                                    |   |                                                                                                                                                   |    |
|------|------------------------------------------------|------|----------------------------------------------------------------------------------------------------------|------------------------------------------------------------------------------------|---|---------------------------------------------------------------------------------------------------------------------------------------------------|----|
| 1075 | Muslim A; Ismail K; Khalil I; Razman N; Zain K | 2011 | Detection of shoreline changes at Kuala Terengganu, Malaysia from multitemporal satellite sensor imagery | Aerial Photo; Multi-Resolution Imagery; Shoreline Change; Sub-Pixel Classification | 6 | 34th International Symposium on Remote Sensing of Environment - The GEOSS Era: towards Operational Environmental Monitoring                       | NA |
| 1076 | Muslim A; Razman N; Khalil I; Zain K; Ismail K | 2011 | Evaluation of soft classification algorithm for subpixel mapping of the shoreline                        | Fuzzy Linear; Fuzzy Sigmoidal; Shoreline Mapping; Soft Classification; Sub Pixel   | 1 | 34th International Symposium on Remote Sensing of Environment - The Geoss Era: towards Operational Environmental Monitoring                       | NA |
| 1077 | Hegge B; Holloway K; Oliver M                  | 2011 | Coastal morphology modelling and management: Oakajee coast                                               | Bypassing; Coastal Management; Coastal Modelling; Coastal Monitoring; Groyne       | 0 | 20th Australasian Coastal and Ocean Engineering Conference 2011 and The 13th Australasian Port and Harbour Conference 2011, Coasts and Ports 2011 | NA |

|      |                                                                       |      |                                                                                                                                       |                                                                                      |    |                                                         |    |
|------|-----------------------------------------------------------------------|------|---------------------------------------------------------------------------------------------------------------------------------------|--------------------------------------------------------------------------------------|----|---------------------------------------------------------|----|
| 1078 | Rajagopalan V;<br>Ushanatesan U                                       | 2011 | Delineation of shoreline changes using remote sensing and geographical information system                                             | Accretion; Beach Slope; Erosion; Shoreline                                           | 0  | International Journal of Applied Engineering Research   | NA |
| 1079 | Liang P; Jan J                                                        | 2011 | Shoreline change detection using multitemporal remote sensing images                                                                  | DMC; Image Classification; Shoreline Change Detection; SPOT-5                        | 0  | 32nd Asian Conference on Remote Sensing 2011, ACRS 2011 | NA |
| 1080 | Ngan N; Liu C; Uyen N                                                 | 2011 | Using Landsat images to observe coastline changes in Mekong river delta, Vietnam                                                      | Coastline Change; Landsat; Mekong River Delta; Remote Sensing; Vietnam               | 0  | 32nd Asian Conference on Remote Sensing 2011, ACRS 2011 | NA |
| 1081 | Lee H; Kim I; Cho W; Yoon J                                           | 2011 | Shoreline and sea bed change along Gangmun shore, South Korea                                                                         | Echo-Sounding; Erosion and Accretion; Real-Time Kinematic GPS; Sea Bottom; Shoreline | 1  | Journal of Coastal Research                             | NA |
| 1082 | Gensac E; Lesourd S; Gardel A; Anthony E; Proisy C; Loisel H          | 2011 | Short-term prediction of the evolution of mangrove surface areas: the example of the mud banks of Kourou and Sinnamary, French Guiana | Avicennia Germinans; Digital Elevation Model; Mud-Bank Elevation                     | 15 | Journal of Coastal Research                             | NA |
| 1083 | Krueger C; Soares C; Huinca S; Leandro D; Gonçalves R                 | 2011 | Satellite positioning on the coast of the Parana, Brazil                                                                              | Coastal Mapping; GPS; Marine Positioning                                             | 2  | Journal of Coastal Research                             | NA |
| 1084 | Pian S; Menier D                                                      | 2011 | The use of a geodatabase to carry out a multivariate analysis of coastline variations at various time and space scales                | Coastline Variations; Spatial Analysis; Spatial Database                             | 8  | Journal of Coastal Research                             | NA |
| 1085 | Nunes M; Ferreira ; Loureiro C; Baily B                               | 2011 | Beach and cliff retreat induced by storm groups at Forte Novo, Algarve (Portugal)                                                     | Beach Levels; Coastal Erosion; Storm Impacts                                         | 13 | Journal of Coastal Research                             | NA |
| 1086 | Tõnisson H; Suursaar ; Orviku K; Jaagus J; Kont A; Willis D; Riviis R | 2011 | Changes in coastal processes in relation to changes in large-scale atmospheric circulation, wave                                      | Accumulation; Erosion; Hindcast; RDGP; Storm Surge; Storminess                       | 26 | Journal of Coastal Research                             | NA |



parameters and sea levels in  
Estonia

|      |                                                 |      |                                                                                                                                                                      |                                                                                                                                        |    |                                                                            |                                      |
|------|-------------------------------------------------|------|----------------------------------------------------------------------------------------------------------------------------------------------------------------------|----------------------------------------------------------------------------------------------------------------------------------------|----|----------------------------------------------------------------------------|--------------------------------------|
| 1087 | Splinter K; Strauss D;<br>Tomlinson R           | 2011 | Assessment of post-storm<br>recovery of beaches using video<br>imaging techniques: a case study<br>at Gold Coast, Australia                                          | Geophysical<br>Measurements;<br>Image Processing;<br>Optical Image<br>Processing; Remote<br>Sensing                                    | 22 | IEEE Transactions<br>on Geoscience and<br>Remote Sensing                   | 10.1109/TGRS.2011.2136351            |
| 1088 | Rankey E                                        | 2011 | Nature and stability of Atoll<br>island shorelines Gilbert island<br>chain Kiribati Equatorial Pacific                                                               | Atoll; El<br>Niño/Southern<br>Oscillation; Kiribati;<br>Longshore Transport;<br>Pacific Ocean; Sea-<br>Level Rise; Shoreline<br>Change | 84 | Sedimentology                                                              | 10.1111/j.1365-<br>3091.2011.01241.x |
| 1089 | Marghany M; Hashim M                            | 2011 | Modelling shoreline change<br>using pointwise algorithm from<br>different TOPSAR polarised<br>bands                                                                  | Air Borne TOPSAR;<br>CVV; LHH; LVV<br>Bands Polarization;<br>Pointwise Method;<br>Shoreline Change<br>Rate; Statistical T-<br>Test     | 0  | International<br>Geoscience and<br>Remote Sensing<br>Symposium<br>(IGARSS) | 10.1109/IGARSS.2011.604993<br>7      |
| 1090 | Eom J; Choi J; Ryu J; Won J                     | 2011 | Monitoring of topographic<br>change on the coastal area                                                                                                              | LIDAR; Satellite<br>Image; Shoreline<br>Change; Time Series<br>Analysis;<br>Topographic Change                                         | 3  | International<br>Geoscience and<br>Remote Sensing<br>Symposium<br>(IGARSS) | 10.1109/IGARSS.2011.604936<br>2      |
| 1091 | Stavrou A; Lawrence J;<br>Mortimore R; Murphy W | 2011 | A geotechnical and GIS-based<br>method for evaluating risk<br>exposition along coastal cliff<br>environments a case study of the<br>Chalk cliffs of southern England | NA                                                                                                                                     | 13 | Natural Hazards<br>and Earth System<br>Science                             | 10.5194/nhess-11-2997-2011           |
| 1092 | Vespremeanu-Stroe A;<br>Tătuț F                 | 2011 | North-atlantic oscillation<br>signature on coastal dynamics<br>and climate variability of the<br>Romanian Black sea coast                                            | Climate Variability;<br>Longshore Sediment<br>Transport; Nao<br>Index; Sea Level;<br>Shoreline Change;<br>Storminess; Wind<br>Regime   | 11 | Carpathian Journal<br>of Earth and<br>Environmental<br>Sciences            | NA                                   |

|      |                                                                                                             |      |                                                                                                                                                                        |                                                                                                                  |    |                                                         |                           |
|------|-------------------------------------------------------------------------------------------------------------|------|------------------------------------------------------------------------------------------------------------------------------------------------------------------------|------------------------------------------------------------------------------------------------------------------|----|---------------------------------------------------------|---------------------------|
| 1093 | Anongponyoskun M;<br>Tharapan S; Doydee P;<br>Choochit L                                                    | 2011 | Satellite images for detection of coastal land use and coastline change in Mueang Prachuap Khiri khan district Thailand during 1987- 2009                              | Coastal Land use;<br>Coastline Change;<br>Prachuap Khiri Khan District; Remote Sensing                           | 2  | Kasetsart Journal - Natural Science                     | NA                        |
| 1094 | Huisman C; Bryan K; Coco G; Ruessink B                                                                      | 2011 | The use of video imagery to analyse groundwater and shoreline dynamics on a Dissipative beach                                                                          | Beach Groundwater;<br>Groundwater Seepage; Remote Sensing; Shoreline Detection; Video Imagery                    | 23 | Continental Shelf Research                              | 10.1016/j.csr.2011.07.013 |
| 1095 | Sulagna S; Poyyamoli G                                                                                      | 2011 | Between vulnerability and adaptations: a preliminary study on natural hazards, coastline change and environmental migration in Satabhaya Gram Panchayat, Orissa, India | Adaptations;<br>Coastline Change;<br>Environmental Migration; Livelihood; Livelihoods; Natural Hazards           | 0  | International Journal of Earth Sciences and Engineering | NA                        |
| 1096 | Vousdoukas M; Ferreira P; Almeida L; Dodet G; PSARos F; Andriolo U; Taborda R; Silva A; Ruano A; Ferreira M | 2011 | Performance of intertidal topography video monitoring of a mesotidal reflective beach in south Portugal                                                                | Artificial Neural Networks; Coastal Erosion; Coastal Morphodynamics; NearShore; Remote Sensing; Video Monitoring | 49 | Ocean Dynamics                                          | 10.1007/s10236-011-0440-5 |
| 1097 | Hereher M                                                                                                   | 2011 | Mapping coastal erosion at the Nile delta western Promontory using Landsat imagery                                                                                     | Change Detection;<br>Coastal Erosion; Remote Sensing; Rosetta                                                    | 26 | Environmental Earth Sciences                            | 10.1007/s12665-011-0928-9 |
| 1098 | Marghany M; Hashim M; Cracknell A                                                                           | 2011 | Simulation of shoreline change using AIRSAR and POLSAR Cband data                                                                                                      | AIRSAR; POLSAR; Quasi Linear; Shoreline Change; Wave Refraction; Wave Spectra                                    | 16 | Environmental Earth Sciences                            | 10.1007/s12665-011-0934-y |

|      |                                                                  |      |                                                                                                                                        |                                                                                                |    |                                                                                                                       |                                     |
|------|------------------------------------------------------------------|------|----------------------------------------------------------------------------------------------------------------------------------------|------------------------------------------------------------------------------------------------|----|-----------------------------------------------------------------------------------------------------------------------|-------------------------------------|
| 1099 | Sundar V; Suresh P                                               | 2011 | Simulation of shoreline evolution and estimation of alongshore sediment transport                                                      | Sediment Transport; Shoreline Changes; Simulation                                              | 0  | Solutions to Coastal Disasters 2011 - Proceedings of The 2011 Solutions to Coastal Disasters Conference               | 10.1061/41185(417)19                |
| 1100 | Yu J; Fu Y; Li Y; Han G; Wang Y; Zhou D; Sun W; Gao Y; Meixner F | 2011 | Effects of water discharge and sediment load on evolution of modern Yellow river delta China over the period from 1976 to 2009         | NA                                                                                             | 70 | Biogeosciences                                                                                                        | 10.5194/bg-8-2427-2011              |
| 1101 | Gao Y; Su F; Ping B; Liu P                                       | 2011 | Spatial and temporal changes and the driving forces of coastline in China Bohai Gulf in recent 30 years                                | Bohai Gulf; Coastline; Driving Forces; Spatial and Temporal Changes                            | 0  | Proceedings - 2011 19th International Conference on Geoinformatics, Geoinformatics 2011                               | 10.1109/GeoInformatics.2011.5981169 |
| 1102 | Liu X                                                            | 2011 | The coastal erosion of the abandoned Yellow river delta in northern Jiangsu province, China based on analysis of remote sensing images | Coast Zone; Coastal Erosion; MNDWI; Remote Sensing; The Abandoned Yellow River (Huanghe) Delta | 4  | Proceedings - 2011 19th International Conference on Geoinformatics, Geoinformatics 2011                               | 10.1109/GeoInformatics.2011.5980821 |
| 1103 | Ji R; Lu Y; Zuo L                                                | 2011 | Coastline change detection of the Bohai Bay using satellite remote sensing                                                             | Bohai Bay; Coastline Change; Harbor Construction; Remote Sensing                               | 3  | 2011 International Conference on Remote Sensing, Environment and Transportation Engineering, Rsete 2011 - Proceedings | 10.1109/RSETE.2011.5964242          |

|      |                                   |      |                                                                                                                                             |                                                                                                                                                |    |                                                                                                                        |                            |
|------|-----------------------------------|------|---------------------------------------------------------------------------------------------------------------------------------------------|------------------------------------------------------------------------------------------------------------------------------------------------|----|------------------------------------------------------------------------------------------------------------------------|----------------------------|
| 1104 | Li J; Zhang Y                     | 2011 | The change and analysis of coastline based on remote sensing measurement                                                                    | Coastline; Human Activities; Remote Sensing                                                                                                    | 2  | ICSDM 2011 - Proceedings 2011 IEEE International Conference on Spatial Data Mining and Geographical Knowledge Services | 10.1109/ICSDM.2011.5969109 |
| 1105 | Zheng G; Peng L; Tao G; Wang C    | 2011 | Remote sensing analysis of Bohai Bay west coast shoreline changes                                                                           | Bohai Bay West Coast; Object-Oriented Method; Remote Sensing Analysis Shoreline Changes; Water Index                                           | 5  | ICSDM 2011 - Proceedings 2011 IEEE International Conference on Spatial Data Mining and Geographical Knowledge Services | 10.1109/ICSDM.2011.5969106 |
| 1106 | Zhang Y                           | 2011 | Coastal environmental monitoring using remotely sensed data and GIS techniques in the modern Yellow river delta China                       | Coastal Environmental Monitoring; Coastal Erosion/Accretion; GIS; Modern Yellow River Delta; Remote Sensing; Spatial-Temporal Changing Pattern | 30 | Environmental Monitoring and Assessment                                                                                | 10.1007/s10661-010-1716-9  |
| 1107 | Arp C; Jones B; Urban F; Grosse G | 2011 | Hydrogeomorphic processes of thermokarst lakes with grounded-ice and floating-ice regimes on the Arctic coastal plain, Alaska               | Arctic Coastal Plain; Lake Ice; Shoreline Erosion; Thermokarst Lakes; Water Balance                                                            | 89 | Hydrological Processes                                                                                                 | 10.1002/hyp.8019           |
| 1108 | Heathfield D; Walker I            | 2011 | Analysis of coastal dune dynamics shoreline position and large woody debris at wickaninnish Bay Pacific Rim national park, British Columbia | NA                                                                                                                                             | 28 | Canadian Journal of Earth Sciences                                                                                     | 10.1139/e11-043            |

|      |                                                                               |      |                                                                                                                                 |                                                                                                                |     |                                                 |                                |
|------|-------------------------------------------------------------------------------|------|---------------------------------------------------------------------------------------------------------------------------------|----------------------------------------------------------------------------------------------------------------|-----|-------------------------------------------------|--------------------------------|
| 1109 | Kuleli T; Guneroglu A; Karsli F; Dihkan M                                     | 2011 | Automatic detection of shoreline change on coastal Ramsar wetlands of Turkey                                                    | Coastal Erosion; Coastline Change; DSAS; Landsat                                                               | 142 | Ocean Engineering                               | 10.1016/j.oceaneng.2011.05.006 |
| 1110 | Shah C                                                                        | 2011 | Automated lake shoreline mapping at subpixel accuracy                                                                           | Change Detection; Edge Detection; Lake Mapping; Land-Cover/Land-Use Classification; Subpixel Edge Localization | 12  | IEEE Geoscience and Remote Sensing Letters      | 10.1109/LGRS.2011.2157951      |
| 1111 | Chen X; Shearer P; Walter F; Fricker H                                        | 2011 | Seventeen Antarctic seismic events detected by global surface waves and a possible link to calving events from satellite images | NA                                                                                                             | 21  | Journal of Geophysical Research: Solid Earth    | 10.1029/2011JB008262           |
| 1112 | Ping C; Michaelson G; Guo L; Jorgenson M; Kanevskiy M; Shur Y; Dou F; Liang J | 2011 | Soil carbon and material fluxes across the eroding Alaska Beaufort sea coastline                                                | NA                                                                                                             | 72  | Journal of Geophysical Research: Biogeosciences | 10.1029/2010JG001588           |
| 1113 | Cui B; Li X                                                                   | 2011 | Coastline change of the Yellow river estuary and its response to the sediment and runoff 1976-2005                              | Accretion-Erosion; Coastline; Hydrological Characteristics; Remote Sensing; The Yellow River Estuary           | 126 | Geomorphology                                   | 10.1016/j.geomorph.2010.12.001 |
| 1114 | Zagórski P                                                                    | 2011 | Shoreline dynamics of Calypsostranda NW Wedel Jarlsberg land Svalbard during the last century                                   | Arctic; Coastal Zone; Sediment Supply; Shoreline Changes; Spitsbergen                                          | 26  | Polish Polar Research                           | 10.2478/v10183-011-0004-x      |
| 1115 | Baptista P; Cunha T; Bernardes C; Gama C; Ferreira ; Dias A                   | 2011 | A precise and efficient methodology to analyse the shoreline displacement rate                                                  | Coastal Erosion; Frontal Dune Baseline; Frontal Dune Crestline; GPS; Management                                | 22  | Journal of Coastal Research                     | 10.2112/09-1187.1              |
| 1116 | Saranathan E; Chandrasekaran R; Manickaraj D; Kannan M                        | 2011 | Shoreline changes in Tharangampadi village Nagapattinam district, Tamil Nadu, India - a case study                              | GIS; GPS; Remote Sensing; Shoreline                                                                            | 18  | Journal of The Indian Society of Remote Sensing | 10.1007/s12524-010-0052-4      |

|      |                                                           |      |                                                                                                                                   |                                                                                                                         |    |                                                                                  |                            |
|------|-----------------------------------------------------------|------|-----------------------------------------------------------------------------------------------------------------------------------|-------------------------------------------------------------------------------------------------------------------------|----|----------------------------------------------------------------------------------|----------------------------|
| 1117 | White S; Parrish C; Calder B; Pe'Eri S; Rzhhanov Y        | 2011 | Lidar-derived national shoreline empirical and stochastic uncertainty analyses                                                    | Empirical Measurements; Monte Carlo Simulation; National Shoreline; Stochastic Modeling; Topographic LIDAR; Uncertainty | 33 | Journal of Coastal Research                                                      | 10.2112/SI-62-7            |
| 1118 | Xhardé R; Long B; Forbes D                                | 2011 | Short-term beach and shoreface evolution on a cusplate foreland observed with airborne topographic and bathymetric Lidar          | Empirical Measurements; Monte Carlo Simulation; National Shoreline; Stochastic Modeling; Topographic LIDAR; Uncertainty | 12 | Journal of Coastal Research                                                      | 10.2112/SI-62-6            |
| 1119 | El-Asmar H; Hereher M                                     | 2011 | Change detection of the coastal zone east of the Nile delta using remote sensing                                                  | Change Detection; Nile Delta; Remote Sensing                                                                            | 94 | Environmental Earth Sciences                                                     | 10.1007/s12665-010-0564-9  |
| 1120 | Kurosaki H; Yuhi M                                        | 2011 | Development of coastal observation system using a network camera and its application to Hachigasaki beach, Japan                  | NA                                                                                                                      | 0  | Asian and Pacific Coasts, 2011 - Proceedings of The 6th International Conference | 10.1142/9789814366489_0052 |
| 1121 | Stancheva M; Marinski J; Peychev V; Palazov A; Stanchev H | 2011 | Long-term coastal changes of Varna Bay caused by anthropogenic influence                                                          | Coastal Defence Structures; Coastal Erosion; Coastal GIS; ICZM; Sand Beaches; Shoreline Modifications                   | 2  | Geo-Eco-Marina                                                                   | NA                         |
| 1122 | Kokot R; Chomnalez F                                      | 2011 | Retreat of the line of coast in las Grutas Río Negro province retroceso de la línea de costa en las grutas provincia de río negro | Coastal Erosion; Pleistocene Beach Ridges; Sea Level Fall; Shore Platform                                               | 9  | Revista De La Asociacion Geologica Argentina                                     | NA                         |

|      |                                                  |      |                                                                                                                                                                                         |                                                                                                                                                                      |    |                                                                                  |                              |
|------|--------------------------------------------------|------|-----------------------------------------------------------------------------------------------------------------------------------------------------------------------------------------|----------------------------------------------------------------------------------------------------------------------------------------------------------------------|----|----------------------------------------------------------------------------------|------------------------------|
| 1123 | Dewidar K                                        | 2011 | Monitoring temporal changes of the surface water area of the Burullus and Manzala lagoons using automatic techniques applied to a Landsat satellite data series of the Nile delta coast | Coastal Lagoon; Landsat; Nile Delta; Shoreline Position Extraction; Surface Area Changes                                                                             | 5  | Mediterranean Marine Science                                                     | 10.12681/mms.45              |
| 1124 | Lee I; Park H; Lee J; Kim Y                      | 2011 | Delineating the natural features of a cadastral shoreline in South Korea using airborne laser scanning                                                                                  | Airborne Light Detection and Ranging (LIDAR); Approximate Higher High-Water Line (AHHWL); Cadastral Shoreline; Shoreline Extraction; Virtual Reference Station (VRS) | 1  | IEEE Journal of Selected topics In Applied Earth Observations and Remote Sensing | 10.1109/JSTARS.2011.2161071  |
| 1125 | Yu K; Hu C; Muller-Karger F; Lu D; Soto I        | 2011 | Shoreline changes in west-central Florida between 1987 and 2008 from Landsat observations                                                                                               | NA                                                                                                                                                                   | 32 | International Journal of Remote Sensing                                          | 10.1080/01431161.2010.535045 |
| 1126 | Sheik M; Chandrasekar C                          | 2011 | A shoreline change analysis along the coast between Kanyakumari and Tuticorin India using digital shoreline analysis system                                                             | Accretion; Beach Nourishment; Coastal Zone Management; Erosion; Hazards                                                                                              | 58 | Geo-Spatial Information Science                                                  | 10.1007/s11806-011-0551-7    |
| 1127 | Hakkou M; Castelle B; Benmohammadi A; Zourarah B | 2011 | Wave climate and morphosedimentary characteristics of the Kenitrabouknadel sandy coast, Morocco                                                                                         | Beach State; Erosion; Longshore Drift; Wave Climate; Wave-Dominated Sandy Beaches                                                                                    | 14 | Environmental Earth Sciences                                                     | 10.1007/s12665-011-0977-0    |
| 1128 | Zhang Y                                          | 2011 | Environmental monitoring of spatial-temporal changes using remote sensing and GIS techniques in the abandoned Yellow river delta coast China                                            | Coastal Erosion; Remote Sensing; Spatial-Temporal Changing Pattern; Yellow River Delta                                                                               | 4  | International Journal of Environment and Pollution                               | 10.1504/IJEP.2011.040278     |
| 1129 | Karsli F; Guneroglu A; Dihkan M                  | 2011 | Spatiotemporal shoreline changes along the southern Black sea coastal zone                                                                                                              | Accretion; Coastal Degradation; Landsat; Management; Turkey                                                                                                          | 29 | Journal of Applied Remote Sensing                                                | 10.1117/1.3624520            |

|      |                                                 |      |                                                                                                                                                       |                                                                                                  |    |                                                 |                              |
|------|-------------------------------------------------|------|-------------------------------------------------------------------------------------------------------------------------------------------------------|--------------------------------------------------------------------------------------------------|----|-------------------------------------------------|------------------------------|
| 1130 | Santra A; Mitra D; Mitra S                      | 2011 | Spatial modeling using high resolution image for future shoreline prediction along junput coast west Bengal India                                     | Coastal Terrain Model; Dynamic Segmentation; End Point Rate Model                                | 11 | Geo-Spatial Information Science                 | 10.1007/s11806-011-0522-z    |
| 1131 | Basile G M; Maglione P; Parente C; Santamaria R | 2011 | Cartography and remote sensing for coastal erosion analysis                                                                                           | Accuracy; Coastal Erosion; GIS; High Resolution Remote Sensed Images; Historical Maps            | 14 | Wit Transactions on Ecology and The Environment | 10.2495/CP110061             |
| 1132 | Boutiba M; Bouakline S                          | 2011 | Monitoring shoreline changes using digital aerial photographs quick-bird image and dGPS topographic survey case of the east coast of Algiers, Algeria | Aerial Photographs; Cartography; Coastal Erosion; dGPS; GIS; Quick-Bird; Shoreline (Changes)     | 4  | European Journal of Scientific Research         | NA                           |
| 1133 | Azarmsa S; Razmkhah F                           | 2011 | Determination of shoreline position in Pozm Bay using Landsat satellite data                                                                          | Coastal Processes; Landsat; Oman Sea; Pozm Bay; Satellite; Shoreline Changes; Shoreline Position | 0  | Journal of The Earth and Space Physics          | NA                           |
| 1134 | Maiti S; Bhattacharya A                         | 2011 | A three-unit-based approach in coastal-change studies using Landsat images                                                                            | NA                                                                                               | 5  | International Journal of Remote Sensing         | 10.1080/01431160903439965    |
| 2069 | Gontz A; Maio C; Wagenknecht E; Berkland E      | 2011 | Assessing threatened coastal sites: applications of ground-penetrating radar and geographic information systems                                       | LIDAR; Shoreline Change; Boston Harbor; Massachusetts; Cemetery; Islands                         | 12 | Journal of Cultural Heritage                    | 10.1016/j.culher.2011.03.003 |



|      |                                                            |      |                                                                                                                                                                                  |                                                                                                                                                                                                                                                                                        |    |                                                         |                                |
|------|------------------------------------------------------------|------|----------------------------------------------------------------------------------------------------------------------------------------------------------------------------------|----------------------------------------------------------------------------------------------------------------------------------------------------------------------------------------------------------------------------------------------------------------------------------------|----|---------------------------------------------------------|--------------------------------|
| 2076 | Revell D; Dugan J; Hubbard D                               | 2011 | Physical and ecological responses of sandy beaches to the 1997-98 El Nino                                                                                                        | Isla Vista; Santa Barbara; Goleta Beach; California; LIDAR; Shoreline Change; Beach Width; Beach Reorientation and Rotation; Erosion Wave; Storm Disturbance; Ecosystem-Based Management; Intertidal; Macrophyte Wrack; Invertebrate Macrofauna; Shorebird; Sanderling; Climate Change | 25 | Journal of Coastal Research                             | 10.2112/JCOASTRES-D-09-00179.1 |
| 1020 | Motevalli S; Mahdi H M; Derafshi K; Gharehchahi S; Ali A M | 2012 | Coastline change detection using remote sensing and GIS at Tonekabon coast area during 1984 and 2010 Mazandaran province, Iran                                                   | Coastline Change; Spatial Detection; TM and ETM+ SENSORS; Tonekabon City                                                                                                                                                                                                               | 0  | Life Science Journal                                    | NA                             |
| 1021 | Grudzinska I; Saarse L; Vassiljev J; Heinsalu A; Veski S   | 2012 | A palaeo-coastline reconstruction for the Käsmu and Pärисpea Peninsulas northern Estonia over the last 4000 years käsmu ja pärispea poolsaare paleorannajoone rekonstruktsioonid | Diatoms; Estonia; Isostatic Land Uplift; Limnea Sea; Palaeogeography; Shoreline Displacement                                                                                                                                                                                           | 5  | Estonian Journal of Earth Sciences                      | 10.3176/earth.2012.4.09        |
| 1022 | Kandrot S                                                  | 2012 | Beachdune morphological relationships at Youghal beach Cork                                                                                                                      | Coastal Dunes; Erosion; LIDAR; Morphodynamics                                                                                                                                                                                                                                          | 2  | Lecture Notes In Geoinformation and Cartography         | 10.1007/978-3-642-29063-3_20   |
| 1023 | Azaz L                                                     | 2012 | Using GIS and remote sensing to map coastline changes of Wedamalsahel area Batinah, Oman between 1998 and 2008                                                                   | Coastal Erosion; GIS; Hazard; Mapping; Remote Sensing                                                                                                                                                                                                                                  | 1  | 33rd Asian Conference on Remote Sensing 2012, ACRS 2012 | NA                             |

|      |                                                                                                                                                  |      |                                                                                                                                                                                                                              |                                                                                                |   |                                                                                    |                             |
|------|--------------------------------------------------------------------------------------------------------------------------------------------------|------|------------------------------------------------------------------------------------------------------------------------------------------------------------------------------------------------------------------------------|------------------------------------------------------------------------------------------------|---|------------------------------------------------------------------------------------|-----------------------------|
| 1024 | Kaewpoo N; Nakhapakorn K; Pumijumnong N; Silapathong C                                                                                           | 2012 | The integration of GIS and mathematical model for shoreline prediction                                                                                                                                                       | Geo-Information Technology and Mathematical Model (LITPACK Model); Shoreline Change Prediction | 2 | 33rd Asian Conference on Remote Sensing 2012, ACRS 2012                            | NA                          |
| 1025 | Samanta S; Pal B                                                                                                                                 | 2012 | Shoreline changes along hansa and broken water Bay coastal tract of Papua New Guinea through remote sensing and GIS                                                                                                          | Coastal Process and Shoreline Change; GIS; Remote Sensing                                      | 0 | 33rd Asian Conference on Remote Sensing 2012, ACRS 2012                            | NA                          |
| 1026 | Norman M; Ghazali N; Manaf A                                                                                                                     | 2012 | Shoreline siltation monitoring using remote sensing techniques: study area: Tg. Dawai, Kedah, Malaysia                                                                                                                       | Human Impacts; Monitoring Changes; Remote Sensing; Siltation                                   | 0 | Chuser 2012 - 2012 IEEE Colloquium on Humanities, Science and Engineering Research | 10.1109/CHUSER.2012.6504283 |
| 1027 | Santos F; Pais-Barbosa J; Teodoro A; Gonçalves H; Baptista P; Moreira A; Veloso-Gomes F; Taveira-Pinto F; Gomes-Costa P; Lopes V; Neves-Santos F | 2012 | Coastal morphodynamic features-patterns analysis through a video based system and image processing                                                                                                                           | Coastal Zone; Morphology; Mozco; Portugal; Shoreline Detection; Video-Monitoring               | 5 | Proceedings of Spie - The International Society For Optical Engineering            | 10.1117/12.974679           |
| 1028 | Aktaş U; Can G; Vural F                                                                                                                          | 2012 | Edge-aware segmentation in satellite imagery: a case study of shoreline detection                                                                                                                                            | NA                                                                                             | 9 | 2012 IAPR Workshop on Pattern Recognition In Remote Sensing, PRRS 2012             | 10.1109/PPRS.2012.6398319   |
| 1029 | Tonisson H; Suursaar U; Kont A                                                                                                                   | 2012 | Maps, aerial photographs, orthophotos and GPS data as a source of information to determine shoreline changes, coastal geomorphic processes and their relation to hydrodynamic conditions on Osmussaar island, the Baltic sea | Baltic Sea; Coastal Erosion; Hydrodynamic Conditions; Shoreline Changes                        | 2 | International Geoscience and Remote Sensing Symposium (IGARSS)                     | 10.1109/IGARSS.2012.6350382 |

|      |                                                    |      |                                                                                                                                |                                                                                                                         |    |                              |                                 |
|------|----------------------------------------------------|------|--------------------------------------------------------------------------------------------------------------------------------|-------------------------------------------------------------------------------------------------------------------------|----|------------------------------|---------------------------------|
| 1030 | Bagdanavičiute I; Kelpšaitė L; Daunys D            | 2012 | Assessment of shoreline changes along the Lithuanian Baltic sea coast during the period 1947-2010                              | Accumulation; Aerial Photography; Digital Shoreline Analysis System; Erosion; Shoreline Change; Southeastern Baltic Sea | 14 | Baltica                      | 10.5200/baltica.2012.25.17      |
| 1031 | Senthilnathan L; Nobi E; Thangaradjou T; Kannan L  | 2012 | Long-time shoreline monitoring of the Vellar estuarine complex southeast coast of India: using multispectral satellite data    | Estuary; Geomorphology; India; IRS-P6 LISS III; Shoreline; Tsunami                                                      | 3  | Journal of Earth Science     | 10.1007/s12583-012-0304-z       |
| 1032 | Goncalves R; Awange J; Krueger C; Heck B; Coelho L | 2012 | A comparison between three short-term shoreline prediction models                                                              | NA                                                                                                                      | 30 | Ocean and Coastal Management | 10.1016/j.ocecoaman.2012.07.024 |
| 1033 | Restrepo J; Otero L; Casas A; Henao A; Gutiérrez J | 2012 | Shoreline changes between 1954 and 2007 in the marine protected area of the Rosario Island archipelago (Caribbean of Colombia) | NA                                                                                                                      | 23 | Ocean and Coastal Management | 10.1016/j.ocecoaman.2012.07.027 |
| 1034 | Yang B; Hwang C; Cordell H                         | 2012 | Use of Lidar shoreline extraction for analyzing revetment rock beach protection: a case study of Jekyll island state park, USA | NA                                                                                                                      | 16 | Ocean and Coastal Management | 10.1016/j.ocecoaman.2012.06.007 |
| 1035 | Ellison J; Zouh I                                  | 2012 | Vulnerability to climate change of mangroves assessment from Cameroon central Africa                                           | Elevation; Geographic Information Systems; Mangroves; Pollen Analysis; Sea-Level Rise; Shoreline Change; Vulnerability  | 49 | Biology                      | 10.3390/biology1030617          |

|      |                                                                                       |      |                                                                                                                                                                                                                                                                                                                                                |                                                                                                                       |    |                                                                  |                                  |
|------|---------------------------------------------------------------------------------------|------|------------------------------------------------------------------------------------------------------------------------------------------------------------------------------------------------------------------------------------------------------------------------------------------------------------------------------------------------|-----------------------------------------------------------------------------------------------------------------------|----|------------------------------------------------------------------|----------------------------------|
| 1036 | Aubry A; Gardel A;<br>Jeanson M; Lesourd S                                            | 2012 | Improvement of the digital modelling of an intertidal foreshore of the north sea coast of France by the contribution of remote sensing the shoreline detection method amélioration de la modélisation numérique de terrain sur un estran intertidal de la mer du nord par l'apport de la télédétection spatiale the shoreline detection method | FORMOSAT-2;<br>Macrotidal;<br>Shoreline; SPOT5;<br>Topography;<br>Waterlines                                          | 1  | Teledetection                                                    | NA                               |
| 1037 | Chaaban F; Darwishe H;<br>Battiau-Queney Y; Louche B; Masson E; Khattabi J; Carlier E | 2012 | Using ArcGIS (R) modelbuilder and aerial photographs to measure coastline retreat and advance: north of France                                                                                                                                                                                                                                 | Aerial Photographs;<br>ARCGIS; Coastal Erosion; GIS; Linear Features; Modelbuilder; Northern France; Shoreline Change | 19 | Journal of Coastal Research                                      | 10.2112/JCOASTRES-D-11-00054.1   |
| 1038 | Frihy O; Deabes E                                                                     | 2012 | Erosion chain reaction at el alamein resorts on the western Mediterranean coast of Egypt                                                                                                                                                                                                                                                       | Alexandria;<br>Carbonate Ridges;<br>Carbonate Sand; Perched Beach; Satellite Images; Wave-Induced Current             | 8  | Coastal Engineering                                              | 10.1016/j.coastaleng.2012.05.009 |
| 1039 | Alberico I; Amato V;<br>Aucelli P; D'Argenio B; Di P G; Pappone G                     | 2012 | Historical shoreline change of the Sele plain (southern Italy): the 1870-2009 time window                                                                                                                                                                                                                                                      | Coastal Erosion; Geographic Information System Analysis; Sele Coastal Area; Shoreline Variation; Southern Italy       | 31 | Journal of Coastal Research                                      | 10.2112/JCOASTRES-D-10-00197.1   |
| 1040 | Tunji L; Hashim A; Yusof K                                                            | 2012 | Shoreline response to three submerged offshore breakwaters along Kerteh Bay coast of Terengganu                                                                                                                                                                                                                                                | Aerial/Satellite Imagery; Coastal Erosion; Numerical Modeling; Predictive Model; Submerged Breakwater                 | 7  | Research Journal of Applied Sciences, Engineering and Technology | NA                               |

|      |                                      |      |                                                                                                   |                                                                                                |   |                                                                                                                           |                                |
|------|--------------------------------------|------|---------------------------------------------------------------------------------------------------|------------------------------------------------------------------------------------------------|---|---------------------------------------------------------------------------------------------------------------------------|--------------------------------|
| 1041 | Natesan U; ParthaSARathy A           | 2012 | Extent of inundation on tsunami 2004 along Vedaranyam, Nagapattinam district, east coast of India | East Coast; Indian Ocean; Inundation; Tsunami                                                  | 0 | Disaster Advances                                                                                                         | NA                             |
| 1042 | Kusimi J; Dika J                     | 2012 | Sea erosion at Ada Foah assessment of impacts and proposed mitigation measures                    | Ada Foah; Coastal Mapping; Sea Erosion; Shoreline Change Analysis; Shoreline Recession         | 8 | Natural Hazards                                                                                                           | 10.1007/s11069-012-0216-3      |
| 1043 | Huo D; Feng Y; Song L                | 2012 | Mapping shoreline of Hangzhou Bay with remote sensing images from 1979 to 2005                    | Fractal Dimension; GIS; Hangzhou Bay; Remote Sensing; Shoreline                                | 2 | 2012 2nd International Conference on Remote Sensing, Environment and Transportation Engineering, RSETE 2012 - Proceedings | 10.1109/RSETE.2012.6260621     |
| 1044 | Zhang Y; Feng Y; Chen Y              | 2012 | Detecting coastal and shoreline change in north branch of Yangtze river based on remote sensing   | Coastal Change; Density Segmentation; North Branch of Yangtze River; Remote Sensing; Shoreline | 0 | 2012 2nd International Conference on Remote Sensing, Environment and Transportation Engineering, Rsete 2012 - Proceedings | 10.1109/RSETE.2012.6260529     |
| 1045 | Aly M; Giardino J; Klein A; Zebker H | 2012 | InSAR study of shoreline change along the Damietta Promontory, Egypt                              | Accretion; Erosion; Nile Delta; Synthetic Aperture Radar Interferometry                        | 5 | Journal of Coastal Research                                                                                               | 10.2112/JCOASTRES-D-11-00182.1 |

|      |                                                                                                |      |                                                                                                                                     |                                                                                                                  |     |                                                                                               |                                |
|------|------------------------------------------------------------------------------------------------|------|-------------------------------------------------------------------------------------------------------------------------------------|------------------------------------------------------------------------------------------------------------------|-----|-----------------------------------------------------------------------------------------------|--------------------------------|
| 1046 | Almar R; Ranasinghe R;<br>Snchal N; Bonneton P;<br>Roelvink D; Bryan K;<br>Marieu V; Parisot J | 2012 | Video-based detection of shorelines at complex meso-macro tidal beaches                                                             | Intertidal Beach Morphology; Mesoamacro Tidal Environment; Shoreline; Swash; Truc Vert Beach; Video Imaging      | 34  | Journal of Coastal Research                                                                   | 10.2112/JCOASTRES-D-10-00149.1 |
| 1047 | Ryabchuk D; Spiridonov M; Zhamoida V; Nesterova E; Sergeev A                                   | 2012 | Long term and short term coastal line changes of the eastern Gulf of Finland. Problems of coastal erosion                           | Coastal Erosion; Eastern Gulf of Finland                                                                         | 9   | Journal of Coastal Conservation                                                               | 10.1007/s11852-010-0105-4      |
| 1048 | Boateng I                                                                                      | 2012 | An application of GIS and coastal geomorphology for large scale assessment of coastal erosion and management: A case study of Ghana | Coastal Erosion; Detecting Coastal Recession; Ghana's Coastline; GIS Application and Coastal Management          | 39  | Journal of Coastal Conservation                                                               | 10.1007/s11852-012-0209-0      |
| 1049 | Pardo-Pascual J; Almonacid-Caballer J; Ruiz L; Palomar-Vázquez J                               | 2012 | Automatic extraction of shorelines from Landsat TM and ETM multitemporal images with subpixel precision                             | Beach Management; Coastal Processes; Landsat Images; Shoreline Subpixel Detection                                | 167 | Remote Sensing of Environment                                                                 | 10.1016/j.rse.2012.02.024      |
| 1050 | Aktaş R; Can G; Vural F                                                                        | 2012 | A robust approach for shoreline detection in satellite imagery uydu görüntülerinde kıyı eridini n tespiti için gürbüz bir yöntem    | NA                                                                                                               | 1   | 2012 20th Signal Processing and Communications Applications Conference, Siu 2012, Proceedings | 10.1109/SIU.2012.6204797       |
| 1051 | Halouani N; Fathallah S; Gueddari M                                                            | 2012 | Beach and nearshore morphodynamic changes of the Tabarka coast northwest of Tunisia                                                 | Coastal Evolution; Erosion; Grain Size Distribution; Seabed Change; Tabarka-Berkoukech; Tunisia; Wave Simulation | 6   | Environmental Earth Sciences                                                                  | 10.1007/s12665-011-1312-5      |

|      |                                                             |      |                                                                                                                                                               |                                                                                                                                                                                                                                           |    |                                                                    |                                          |
|------|-------------------------------------------------------------|------|---------------------------------------------------------------------------------------------------------------------------------------------------------------|-------------------------------------------------------------------------------------------------------------------------------------------------------------------------------------------------------------------------------------------|----|--------------------------------------------------------------------|------------------------------------------|
| 1052 | Virdis S; Oggiano G;<br>Disperati L                         | 2012 | A geomatics approach to<br>multitemporal shoreline analysis<br>in western Mediterranean: the<br>case of platamonamaritza beach<br>(northwest Sardinia, Italy) | Accuracy Assessment;<br>Coastal Erosion;<br>Data Integration;<br>Erosion Rate; GPS;<br>Laser Scanning;<br>LIDAR;<br>Multitemporal<br>Analysis;<br>Photogrammetry                                                                          | 25 | Journal of Coastal<br>Research                                     | 10.2112/JCOASTRES-D-11-<br>00078.1       |
| 1053 | Luque I; Aguilar T F;<br>Aguilar T M; Prez G J;<br>Arenas A | 2012 | A new robust and accurate<br>method to extract tide-<br>coordinated shorelines from<br>coastal elevation models                                               | Coastal Erosion-<br>Accretion; Cross-<br>Shore Profile.;<br>Digital Elevation<br>Model;<br>Extrapolation<br>Method; LIDAR;<br>Remote Sensing;<br>Shoreline Analysis;<br>Shoreline Change;<br>Shoreline Definition;<br>Shoreline Detection | 6  | Journal of Coastal<br>Research                                     | 10.2112/JCOASTRES-D-11-<br>00107.1       |
| 1054 | United S G S U                                              | 2012 | National assessment of shoreline<br>change historical shoreline<br>change along the New England<br>and midatlantic coasts                                     | NA                                                                                                                                                                                                                                        | 0  | Vulnerable U.S.<br>Shorelines and<br>Coasts: Select<br>Assessments | NA                                       |
| 1055 | Jackson J C; Alexander C;<br>Bush D                         | 2012 | Application of the AMBUR R<br>package for spatiotemporal<br>analysis of shoreline change<br>Jekyll island Georgia, USA                                        | Coastline; Erosion;<br>Forecast; GIS;<br>Movement;<br>Program; Rate                                                                                                                                                                       | 48 | Computers and<br>Geosciences                                       | 10.1016/j.cageo.2011.08.009              |
| 1056 | Li J; Zhang Y                                               | 2012 | Analysis of coastline change<br>based on remote sensing<br>measurement                                                                                        | Coastline Change;<br>Progradation and<br>Erosion Change;<br>Remote Sensing<br>Measurement;<br>Sheyang Estuary;<br>Tidal Flat Resources<br>Exploitation                                                                                    | 7  | Journal of Hohai<br>University                                     | 10.3876/j.issn.1000-<br>1980.2012.02.019 |

|      |                                                                     |      |                                                                                                             |                                                                                                                 |    |                                                                                     |                                |
|------|---------------------------------------------------------------------|------|-------------------------------------------------------------------------------------------------------------|-----------------------------------------------------------------------------------------------------------------|----|-------------------------------------------------------------------------------------|--------------------------------|
| 1057 | Nebel S; Trembanis A; Barber D                                      | 2012 | Shoreline analysis and barrier island dynamics decadal scale patterns from Cedar Island, Virginia           | Barrier Islands; Coastal Retreat; Eastern Shore; Erosion Rate; Shoreline Mapping; Virginia; Wachapreague        | 18 | Journal of Coastal Research                                                         | 10.2112/JCOASTRES-D-10-00144.1 |
| 1058 | Parrish C                                                           | 2012 | Shoreline mapping                                                                                           | NA                                                                                                              | 5  | Advances In Mapping From Remote Sensor Imagery: Techniques and Applications         | 10.1201/b13770                 |
| 1059 | Chen W; Kuo H                                                       | 2012 | Historical shoreline change in hualien coast                                                                | Coastal Erosion; GIS; Image; Shoreline Change                                                                   | 0  | 6th Chinese-German Joint Symposium on Hydraulic and Ocean Engineering, Cgjoint 2012 | NA                             |
| 1060 | Xing L; Yun-Xuan Z; Lian-Peng Z; Run-Yuan K                         | 2012 | Evaluating longshore sediment transport rates by integration of beach evolution model and GIS approach      | End Point Rate; Geographical Information System; Longshore Sediment Transport Rate; Muddy Coast; One-Line Model | 2  | Indian Journal of Geo-Marine Sciences                                               | NA                             |
| 1061 | Lin H; Chu F; Huang Y                                               | 2012 | The beach degradation and sustainable management of the sandy coast the Yilan coast of northeastern, Taiwan | Beach Degradation; Beach Morphology; Coastal Management; GIS; Shoreline Change                                  | 0  | Wit Transactions on Ecology and The Environment                                     | 10.2495/ISLANDS120161          |
| 1062 | Mukhopadhyay A; Mukherjee S; Mukherjee S; Ghosh S; Hazra S; Mitra D | 2012 | Automatic shoreline detection and future prediction: a case study on puri coast Bay of Bengal, India        | EPR Model; Erosion; India; Orissa; Puri; Shoreline Prediction                                                   | 54 | European Journal of Remote Sensing                                                  | 10.5721/EuJRS20124519          |



|      |                                                                                   |      |                                                                                                                                                                                                                                                                                                                          |                                                                                                                            |    |                                                    |                               |
|------|-----------------------------------------------------------------------------------|------|--------------------------------------------------------------------------------------------------------------------------------------------------------------------------------------------------------------------------------------------------------------------------------------------------------------------------|----------------------------------------------------------------------------------------------------------------------------|----|----------------------------------------------------|-------------------------------|
| 1063 | Starek M; Vemula R;<br>Slatton K                                                  | 2012 | Probabilistic detection of morphologic indicators for beach segmentation with multitemporal Lidar measurements                                                                                                                                                                                                           | Divergence; Light Detection and Ranging (LIDAR); Pattern Classification; Shoreline Erosion                                 | 7  | IEEE Transactions on Geoscience and Remote Sensing | 10.1109/TGRS.2012.2191559     |
| 1064 | Touré B; Kouamé K;<br>Souleye W; Collet C;<br>Affian K; Ozer A; Rudant J; Biémi J | 2012 | The influence of anthropic actions in the historical coastal evolution of a sandy coast with high sediment drift: the Bay of Port-Bouet (Abidjan, Ivory Coast) linfluence des actions anthropiques dans lévolution historique dun littoral sableux à forte dérive sédimentaire la baie de portbouët abidjan côte divoire | Beach Erosion; Coastal Zone; Ivory Coast; Management; Remote Sensing                                                       | 7  | Geomorphologie: Relief, Processus, Environnement   | 10.4000/geomorphologie.9990   |
| 1065 | Liu Y; Huang H; Qiu Z;<br>Chen J; Yang X                                          | 2012 | Monitoring change and position of coastlines from satellite images using slope correction in a tidal flat: a case study in the Yellow river delta                                                                                                                                                                        | Coastline; Erosion and Accretion; Gradient of Tidal Flat; Remote Sensing; Yellow River Delta                               | 4  | Dili Xuebao/Acta Geographica Sinica                | NA                            |
| 1066 | Ahmad S; Lakhan V                                                                 | 2012 | GIS-based analysis and modeling of coastline advance and retreat along the coast of Guyana                                                                                                                                                                                                                               | Coastal Advance and Retreat; Digital Shoreline Analysis System; Geographical Information Systems; Mudbanks; Remote Sensing | 25 | Marine Geodesy                                     | 10.1080/01490419.2011.637851  |
| 1067 | Yang B; Madden M; Kim J;<br>Jordan T                                              | 2012 | Geospatial analysis of barrier island beach availability to tourists                                                                                                                                                                                                                                                     | Beach Availability; Coastal Tourism; GIS; LIDAR; Shoreline Change                                                          | 31 | tourism Management                                 | 10.1016/j.tourman.2011.08.013 |

|      |                                                                                |      |                                                                                                                                                              |                                                                                                                                                                              |     |                                               |                                |
|------|--------------------------------------------------------------------------------|------|--------------------------------------------------------------------------------------------------------------------------------------------------------------|------------------------------------------------------------------------------------------------------------------------------------------------------------------------------|-----|-----------------------------------------------|--------------------------------|
| 1068 | Kratzmann M; Hapke C                                                           | 2012 | Quantifying anthropogenically driven morphologic changes on a barrier island: fire island national seashore, New York                                        | Anthropogenic; Barrier Island; Beach Erosion; Beach Profile; Beach Scraping; Beach Volume; Fire Island; Long Island; Shore Protection; Shoreline Change; U.S. National Parks | 16  | Journal of Coastal Research                   | 10.2112/JCOASTRES-D-10-00012.1 |
| 1069 | Ford M                                                                         | 2012 | Shoreline changes on an urban Atoll in the central Pacific ocean: Majuro Atoll, Marshall island                                                              | Anthropogenic Impacts; Erosion; Pacific Ocean; Reclamation; Shoreline Change                                                                                                 | 105 | Journal of Coastal Research                   | 10.2112/JCOASTRES-D-11-00008.1 |
| 1070 | Gorokhovich Y; Leiserowiz A                                                    | 2012 | Historical and future coastal changes in northwest Alaska                                                                                                    | Alaska; Coastal Erosion; Coastal Geomorphology; Shoreline Change                                                                                                             | 15  | Journal of Coastal Research                   | 10.2112/JCOASTRES-D-11-00031.1 |
| 1071 | Maio C; Gontz A; Tenenbaum D; Berkland E                                       | 2012 | Coastal hazard vulnerability assessment of sensitive historical sites on Rainsford island, Boston harbor, Massachusetts                                      | Coastal Management; Cultural Resources; Erosion; LIDAR; Sea-Level Rise; Shoreline Change                                                                                     | 29  | Journal of Coastal Research                   | 10.2112/JCOASTRES-D-10-00104.1 |
| 2035 | Chaaban F; Darwishe H; Battiau-Queney Y; Louche B; Masson E; El K J; Carlier E | 2012 | Using ArcGIS ® modelbuilder and aerial photographs to measure coastline retreat and advance: north of France                                                 | GIS; Shoreline Change; ARCGIS; Modelbuilder; Aerial Photographs; Coastal Erosion; Linear Features; Northern France                                                           | 15  | Journal of Coastal Research                   | 10.2112/JCOASTRES-D-11-00054.1 |
| 2038 | Hamylton S; East H                                                             | 2012 | A geospatial appraisal of ecological and geomorphic change on Diego Garcia Atoll, Chagos islands (British Indian ocean territory)                            | Chagos Islands; Shoreline; Change Detection; Benthic Habitat                                                                                                                 | 21  | Remote Sensing                                | 10.3390/rs4113444              |
| 2045 | Toure B; Kouame K; Souleye W; Collet C; Affian K; Ozer A; Rudant J; Biemi J    | 2012 | The influence of anthropic actions in the historical coastal evolution of a sandy coast with high sediment drift: the Bay of Portbouet, Abidjan, Ivory Coast | Coastal Zone; Beach Erosion; Remote Sensing; Management; Ivory Coast                                                                                                         | 0   | Geomorphologie-Relief Processus Environnement | NA                             |

|      |                                            |      |                                                                                                                                                                                                       |                                                                                                                       |    |                                                                                   |                                  |
|------|--------------------------------------------|------|-------------------------------------------------------------------------------------------------------------------------------------------------------------------------------------------------------|-----------------------------------------------------------------------------------------------------------------------|----|-----------------------------------------------------------------------------------|----------------------------------|
| 2051 | Smith M; Cromley R                         | 2012 | Measuring historical coastal change using GIS and the change polygon approach                                                                                                                         | NA                                                                                                                    | 26 | Transactions In GIS                                                               | 10.1111/j.1467-9671.2011.01292.x |
| 957  | Da S L; Gonçalves R; Da S L M; De S P      | 2013 | Fuzzy modeling applied to coastal erosion vulnerability detection modelagem fuzzy aplicada na detecção da vulnerabilidade à erosão costeira                                                           | Coastal Mapping; Fuzzy Modeling; Shoreline; Vulnerability To Coastal Erosion                                          | 10 | Boletim De Ciencias Geodesicas                                                    | 10.1590/S1982-217020130004000014 |
| 958  | Braga F; Tosi L; Prati C; Alberotanza L    | 2013 | Shoreline detection capability of cosmoskymed and high-resolution multispectral images                                                                                                                | Cosmo-Skymed; Morphological Model; Multispectral Images; Shoreline; Tidal Level; Venice                               | 19 | European Journal of Remote Sensing                                                | 10.5721/EuJRS20134650            |
| 959  | Stanchev H; Young R; Stancheva M           | 2013 | Integrating GIS and high resolution orthophoto images for the development of a geomorphic shoreline classification and risk assessment: aa case study of cliffbluff erosion along the Bulgarian coast | Bulgaria; Coastal Erosion; Coastline Segmentation; GIS; Orthophoto Images                                             | 17 | Journal of Coastal Conservation                                                   | 10.1007/s11852-013-0271-2        |
| 960  | Ge L; Li X; Wu F; Turner I                 | 2013 | Coastal erosion mapping through intergration of SAR and Landsat TM imagery                                                                                                                            | Coastal Erosion Mapping; Landsat TM; Linear Spectral Unmixing; SAR Imagery; Shoreline Extraction; Sub-Pixel Technique | 4  | International Geoscience and Remote Sensing Symposium (IGARSS)                    | 10.1109/IGARSS.2013.6723269      |
| 961  | Lan P; Son T; Gunasekara K; Nhan N; Hien L | 2013 | Application of remote sensing and GIS technology for monitoring coastal changes in estuary area of the Red river system, Vietnam                                                                      | Coastal Erosion; Coastal Line Extraction; Coastal Morphological; Sand Bar Movement                                    | 4  | Journal of The Korean Society of Surveying Geodesy Photogrammetry and Cartography | 10.7848/ksgpc.2013.31.6-2.529    |

|     |                                                       |      |                                                                                                                                       |                                                                                                                      |    |                                 |                                         |
|-----|-------------------------------------------------------|------|---------------------------------------------------------------------------------------------------------------------------------------|----------------------------------------------------------------------------------------------------------------------|----|---------------------------------|-----------------------------------------|
| 962 | Tibbetts J; Van P D                                   | 2013 | Development of a relative coastal vulnerability index in a macrotidal environment for climate change adaptation                       | Coastal Vulnerability Assessment; Geographic Information System; Python Scripting; Shoreline; Stormsurge             | 15 | Journal of Coastal Conservation | 10.1007/s11852-013-0277-9               |
| 963 | Danial D; Jusoff K; Asmidar A; Hamsiah H; Syah C      | 2013 | Analysis of coastline changes using satellite image data at Tanjung Bunga, Makassar south Sulawesi                                    | Reclamation; Remote Sensing; Satellite Image; Tanjung Bunga                                                          | 0  | World Applied Sciences Journal  | 10.5829/idosi.wasj.2013.26.nrrdsi.26007 |
| 964 | Saxena S; Geethalakshmi V; Lakshmanan A               | 2013 | Development of habitation vulnerability assessment framework for coastal hazards: Cuddalore coast in Tamil Nadu, India - a case study | Coastal Habitation; Coastline Change; Composite Vulnerability Index; Hazard Mapping                                  | 23 | Weather and Climate Extremes    | 10.1016/j.wace.2013.10.001              |
| 965 | Sheik M P; Chandrasekar N                             | 2013 | Coastal erosion hazard and vulnerability assessment for southern coastal Tamil Nadu of India by using remote sensing and GIS          | Climate Change; Coastal Zone Management; Sea-Level Rise; Vulnerability                                               | 51 | Natural Hazards                 | 10.1007/s11069-011-9962-x               |
| 966 | Bayram B; Seker D; Acar U; Yuksel Y; Guner H; Cetin I | 2013 | An integrated approach to temporal monitoring of the shoreline and basin of Terkos lake                                               | Automatic Shoreline Extraction; Coastal Monitoring; Image Processing; Object-Oriented Classification; Remote Sensing | 17 | Journal of Coastal Research     | 10.2112/JCOASTRES-D-12-00084.1          |
| 967 | Earlie C; Masselink G; Russell P; Shail R             | 2013 | Sensitivity analysis of the methodology for quantifying cliff erosion using airborne Lidar - examples from Cornwall, UK               | Digital Elevation Model; Hard-Rock Coastline; Root Mean Squared Error; Shoreline Management Plan                     | 9  | Journal of Coastal Research     | 10.2112/SI65-080                        |
| 968 | Jayson-Quashigah P; Addo K; Kodzo K                   | 2013 | Medium resolution satellite imagery as a tool for monitoring shoreline change: Case study of the eastern coast of Ghana               | Aster; Coastal Erosion; DSAS; Keta Sea Defence Project; Landsat                                                      | 37 | Journal of Coastal Research     | 10.2112/SI65-087                        |
| 969 | Cho J; Cho J; Yun H; Kim T; Kim C                     | 2013 | A study of shoreline changes in Antarctica terra nova Bay based on SAR data                                                           | Antarctica; Ortho-Rectification Image;                                                                               | 0  | Journal of Coastal Research     | 10.2112/SI65-355                        |

SAR; Shoreline  
Changes

|     |                                                                     |      |                                                                                                                                                       |                                                                                                                                             |    |                                 |                           |
|-----|---------------------------------------------------------------------|------|-------------------------------------------------------------------------------------------------------------------------------------------------------|---------------------------------------------------------------------------------------------------------------------------------------------|----|---------------------------------|---------------------------|
| 970 | Kim I; Lee H; Song D                                                | 2013 | Time series analysis of shoreline changes in Gonghyunjin and Songjiho beaches, South Korea using aerial photographs and remotely sensed imagery       | Aerial Photographs; Beach Width; IKONOS Image; Plane Area; Shoreline Change                                                                 | 9  | Journal of Coastal Research     | 10.2112/SI65-239          |
| 971 | Albuquerque M; Espinoza J; Teixeira P; De O A; Corrêa I; Calliari L | 2013 | Erosion or coastal variability an evaluation of the DSAS and the change polygon methods for the determination of erosive processes on sandy beaches   | Coastal Erosion; Coastal Variability; GPS-RTK; Satellite Images                                                                             | 22 | Journal of Coastal Research     | 10.2112/SI65-289          |
| 972 | Del R L; Gracia F; Benavente J                                      | 2013 | Morphological and evolutionary classification of sandy beaches in Cadiz coast SW Spain                                                                | Aerial Photographs; Beach Classification; Coastal Erosion; Coastal Geomorphology; Gulf of Cadiz; Shoreline Changes                          | 6  | Journal of Coastal Research     | 10.2112/SI65-357          |
| 973 | Kim I; Lee H; Cho W; Song D                                         | 2013 | Shoreline changes due to groin construction in Namae and Sodol beaches, South Korea                                                                   | Beach Erosion; Beach Width; Groin Construction; Littoral Drift Cell; Plane Area; Shoreline Changes                                          | 4  | Journal of Coastal Research     | 10.2112/SI65-360          |
| 974 | Mole M; Mortlock T; Turner I; Goodwin I; Splinter K; Short A        | 2013 | Capitalizing on the surfcam phenomenon a pilot study in regional-scale shoreline and inshore wave monitoring utilizing existing camera infrastructure | Coastal Imaging; Coastal Monitoring; Coastalcoms; Daily Beach Variability; Image Processing; Internet Protocol Cameras; Low Mounted Cameras | 14 | Journal of Coastal Research     | 10.2112/SI65-242          |
| 975 | SARwar M; Woodroffe C                                               | 2013 | Rates of shoreline change along the coast of Bangladesh                                                                                               | Bangladesh; Bay of Bengal; Delta; Landsat Imagery; Shoreline Change; Sundarbans                                                             | 78 | Journal of Coastal Conservation | 10.1007/s11852-013-0251-6 |

|     |                                                |      |                                                                                                                                                            |                                                                                                                               |    |                                                                                                           |                                |
|-----|------------------------------------------------|------|------------------------------------------------------------------------------------------------------------------------------------------------------------|-------------------------------------------------------------------------------------------------------------------------------|----|-----------------------------------------------------------------------------------------------------------|--------------------------------|
| 976 | Jana A; Bhattacharya A                         | 2013 | Assessment of coastal erosion vulnerability around Midnapurbalasore coast, eastern India using integrated remote sensing and GIS techniques                | Coastal Erosion; Coastal Vulnerability Index; Imminent Collapse Zone (ICZ); Landsat Data; Land use; Population                | 29 | Journal of The Indian Society of Remote Sensing                                                           | 10.1007/s12524-012-0251-2      |
| 977 | Yao Z; Xiao J; Ta W; Jia X                     | 2013 | Planform channel dynamics along the Ningxiainner Mongolia reaches of the Yellow river from 1958 to 2008 analysis using Landsat images and topographic maps | Channel Planform Dynamics; Channel Shifting; Inner Mongolia; Ningxia; Yellow River                                            | 28 | Environmental Earth Sciences                                                                              | 10.1007/s12665-012-2106-0      |
| 978 | Aiello A; Canora F; Pasquariello G; Spilotro G | 2013 | Shoreline variations and coastal dynamics a spacetime data analysis of the Jonian littoral, Italy                                                          | Basilicata Region; Coastal Erosion; DSAS; Italy; Jonian Littoral; Shoreline Variations                                        | 39 | Estuarine, Coastal and Shelf Science                                                                      | 10.1016/j.ecss.2013.06.012     |
| 979 | Neelamani S; Uddin S                           | 2013 | Erosion and accretion index for Kuwaiti coast                                                                                                              | Accretion; Coastline Evolution; Erosion; Kuwaiti Shoreline; Natural and Manmade Coastal Changes; Remote Sensing; Stable Coast | 3  | International Journal of Environmental Research                                                           | NA                             |
| 980 | Del R L; Gracia F; Benavente J                 | 2013 | Shoreline change patterns in sandy coasts: A case study in SW Spain                                                                                        | Aerial Photographs; Beach Changes; Beach Morphology; Coastal Erosion; Gulf of Cadiz                                           | 74 | Geomorphology                                                                                             | 10.1016/j.geomorph.2012.07.027 |
| 981 | Umar Z; Akib W; Ahmad A                        | 2013 | Monitoring shoreline change using remote sensing and GIS: A case study of Padang coastal area Indonesia                                                    | GIS; Monitoring; Remote Sensing; Sediment; Shoreline                                                                          | 4  | Proceedings - 2013 IEEE 9th International Colloquium on Signal Processing and Its Applications, CSPA 2013 | 10.1109/CSPA.2013.6530056      |

|     |                                                     |      |                                                                                                                                                        |                                                                                                     |     |                                                         |                                |
|-----|-----------------------------------------------------|------|--------------------------------------------------------------------------------------------------------------------------------------------------------|-----------------------------------------------------------------------------------------------------|-----|---------------------------------------------------------|--------------------------------|
| 982 | Wang Y; Hou X; Shi P; Yu L                          | 2013 | Detecting shoreline changes in typical coastal wetlands of Bohai Rim in north China                                                                    | Coastal Wetlands; Ecology; Remote Sensing; Shoreline Change                                         | 9   | Wetlands                                                | 10.1007/s13157-013-0418-9      |
| 983 | Ford M                                              | 2013 | Shoreline changes interpreted from multitemporal aerial photographs and high resolution satellite images Wotje Atoll, Marshall Islands                 | Atoll Islands; Sea Level Rise; Shoreline Change                                                     | 169 | Remote Sensing of Environment                           | 10.1016/j.rse.2013.03.027      |
| 984 | Yates M; Le C G; Garcin M; Salaï E; Walker P        | 2013 | Multidecadal Atoll shoreline change on Manihi and Manuae French Polynesia                                                                              | Climate Change; Erosion; Sea-Level Rise; South Pacific                                              | 54  | Journal of Coastal Research                             | 10.2112/JCOASTRES-D-12-00129.1 |
| 985 | Biribo N; Woodroffe C                               | 2013 | Historical area and shoreline change of reef islands around Tarawa Atoll kiribati                                                                      | Atoll; Kiribati; Sea-Level Rise; Shoreline Change; Tarawa Atoll                                     | 64  | Sustainability Science                                  | 10.1007/s11625-013-0210-z      |
| 986 | Eulie D; Walsh J; Corbett D                         | 2013 | high-resolution analysis of shoreline change and application of balloon-based aerial photography Albemarle Pamlico estuarine system North Carolina USA | NA                                                                                                  | 15  | Limnology and Oceanography: Methods                     | 10.4319/lom.2013.11.151        |
| 987 | Mitsova D; Wissinger F; Esnard A; Shankar R; Gies P | 2013 | A collaborative geospatial shoreline inventory tool to guide coastal development and habitat conservation                                              | Coastal Planning; Collaborative Mapping; Esri Geoportal Server; Geovisualization; Participatory GIS | 5   | ISPRS International Journal of Geo-Information          | 10.3390/ijgi2020385            |
| 988 | Choudhary R; Gowthaman R; Sanil K V                 | 2013 | Shoreline change detection from Karwar to Gokarna south west coast of India using remotely sensed data                                                 | Geomorphology; Remote Sensing; Shoreline Changes                                                    | 6   | International Journal of Earth Sciences and Engineering | NA                             |
| 989 | Indiveri A; Marsico A; Pennetta L                   | 2013 | Erosion hazard assessment along the Capitolo coast Monopoli southern Italy                                                                             | Apulia; Coast; Erosion; GIS; Hazard                                                                 | 0   | Journal of Maps                                         | 10.1080/17445647.2013.777857   |
| 990 | Natesan U; Thulasiraman N; Deepthi K; Kathiravan K  | 2013 | Shoreline change analysis of Vedaranyam coast Tamil Nadu India                                                                                         | Accretion; Erosion; Shoreline Change; Tsunami 2004; Vedaranyam Coast                                | 21  | Environmental Monitoring and Assessment                 | 10.1007/s10661-012-2928-y      |

|     |                                                    |      |                                                                                                                                             |                                                                                                      |    |                                         |                                |
|-----|----------------------------------------------------|------|---------------------------------------------------------------------------------------------------------------------------------------------|------------------------------------------------------------------------------------------------------|----|-----------------------------------------|--------------------------------|
| 991 | Kunte P; Alagarsamy R; Hursthouse A                | 2013 | Sediment fluxes and the littoral drift along northeast andhra pradesh coast India estimation by remote sensing                              | Andhra Pradesh; India; Pollutants; Remote Sensing; Sediment Transport; Suspended Particulate Matter  | 9  | Environmental Monitoring and Assessment | 10.1007/s10661-012-2934-0      |
| 992 | Romine B; Fletcher C                               | 2013 | A summary of historical shoreline changes on beaches of Kauai, Oahu and Maui Hawaii                                                         | Coastal Erosion; DSAS; National Assessment of Shoreline Change; Pacific Islands; Shoreline Recession | 36 | Journal of Coastal Research             | 10.2112/JCOASTRES-D-11-00202.1 |
| 993 | Al-Hatrushi S                                      | 2013 | Monitoring of the shoreline change using remote sensing and GIS: A case study of Al Hawasnah tidal inlet al Batinah coast sultanate of Oman | Coastal Change Detection; Coastal Erosion; Coastal Geomorphology; Tidal Inlets; Wadi Outlet          | 23 | Arabian Journal of Geosciences          | 10.1007/s12517-011-0424-2      |
| 994 | Dulanya Z; Reed J; Trauth M                        | 2013 | Mapping changing shorelines in the Malombe and Chiuta lakes of malawienvironmental effects of recent climatic variations                    | ENSO/IOD; Lake Chiuta; Lake Malombe; Lake-Area                                                       | 7  | Catena                                  | 10.1016/j.catena.2012.10.016   |
| 995 | Chu Z; Yang X; Feng X; Fan D; Li Y; Shen X; Miao A | 2013 | Temporal and spatial changes in coastline movement of the Yangtze delta during 19742010                                                     | Human Impacts; Shoreline Change; Yangtze (Changjiang) Delta                                          | 47 | Journal of Asian Earth Sciences         | 10.1016/j.jseaes.2013.01.002   |
| 996 | Mujabar P; Chandrasekar N                          | 2013 | Shoreline change analysis along the coast between Kanyakumari and Tuticorin of India using remote sensing and GIS                           | Accretion; Beach Nourishment; Coastal Zone Management; Erosion; Hazards                              | 78 | Arabian Journal of Geosciences          | 10.1007/s12517-011-0394-4      |
| 997 | Sagoe-Addy K; Appeaning A K                        | 2013 | Effect of predicted sea level rise on tourism facilities along Ghana's Accra coast                                                          | Coast of Accra; Coastal Erosion; Mean Sea Level; Tourism Facilities; Vulnerability                   | 32 | Journal of Coastal Conservation         | 10.1007/s11852-012-0227-y      |
| 998 | Appeaning A K                                      | 2013 | Shoreline morphological changes and the human factor: case study of Accra, Ghana                                                            | Erosion; Land Squeeze; Sea Level Rise; Shoreline; Shoreline Change                                   | 25 | Journal of Coastal Conservation         | 10.1007/s11852-012-0220-5      |



|      |                                    |      |                                                                                                                      |                                                                                               |   |                                                                                                    |                              |
|------|------------------------------------|------|----------------------------------------------------------------------------------------------------------------------|-----------------------------------------------------------------------------------------------|---|----------------------------------------------------------------------------------------------------|------------------------------|
| 999  | Sertel E; Seker D                  | 2013 | Determination of human induced coastal changes using RS, GIS and geostatistics                                       | Coastal Erosion; Geographic Information System; Geostatistical Method; Thematic Mapper        | 0 | Coastal Research Library                                                                           | 10.1007/978-94-007-5234-4_3  |
| 1000 | Appeaning-Addo K; Lamptey E        | 2013 | Innovative technique of predicting shoreline change in developing countries case of Accra erosion and causal factors | Coastal Erosion; Littoral Drift; Root Mean Square Error; Shoreline Change; Shoreline Position | 3 | Coastal Research Library                                                                           | 10.1007/978-94-007-5234-4_14 |
| 1001 | Jeong S; Khim B; Kim B; Lee S      | 2013 | Shorelinechange rates of the barrier islands in Nakdong river estuary using aerial photography and SPOT-5 image      | Aerial Photograph; Barrier Islands; Nakdong River Estuary; Satellite Image; Shoreline Change  | 3 | Ocean and Polar Research                                                                           | 10.4217/OPR.2013.35.1.001    |
| 1002 | Xu J; Zhang Z; Zuo L; Wen Q; Liu B | 2013 | Temporal and spatial analysis of coastline changes in the Bohai Rim based on RS and GIS                              | Coastline; Remote Sensing; The Bohai Rim                                                      | 1 | International Conference on Remote Sensing, Environment and Transportation Engineering, Rsete 2013 | 10.2991/rsete.2013.177       |
| 1003 | Yang H; Wang Y; Wei J              | 2013 | Implementation of the evaluation system of coastline change and stability on Yellow river estuary                    | Coastline Change; GIS; RS; Stability Evaluation; Yellow River Estuary                         | 1 | International Conference on Remote Sensing, Environment and Transportation Engineering, Rsete 2013 | 10.2991/rsete.2013.145       |

|      |                                    |      |                                                                                                |                                                                |    |                                                                                                    |                    |
|------|------------------------------------|------|------------------------------------------------------------------------------------------------|----------------------------------------------------------------|----|----------------------------------------------------------------------------------------------------|--------------------|
| 1004 | Shan C; Wang J                     | 2013 | The monitoring and analysis of the Moye island seas using situation based on remote sensing    | Classification; Monitor; Remote Sensing; Sea Island; Shoreline | 0  | International Conference on Remote Sensing, Environment and Transportation Engineering, Rsete 2013 | NA                 |
| 1005 | Sun W; Zhang J; Ren G; Ma Y; Ni S  | 2013 | Coastline remote sensing monitoring and change analysis of Laizhou Bay from 1978 to 2009       | Coastline; Laizhou Bay; Remote Sensing                         | 1  | International Conference on Remote Sensing, Environment and Transportation Engineering, Rsete 2013 | NA                 |
| 1006 | Lin L; Pan Z; Xiao K; Ye N         | 2013 | The coastline extraction for Fujian province based on long time series of remote sensing image | Canny; Coastline Extraction; Edge Detection; GIS; Idl&Envi     | 2  | International Conference on Remote Sensing, Environment and Transportation Engineering, Rsete 2013 | NA                 |
| 1007 | Ramzi A; Khder W; Omran R; Fatih N | 2013 | Coastal line and coastal area changes of Ras Suder district south Sinai Governorate, Egypt     | Change Detection; Coast Line; GIS.; Remotely Sensed Data       | 0  | 34th Asian Conference on Remote Sensing 2013, ACRS 2013                                            | NA                 |
| 1008 | Jewell P; Bruhn R                  | 2013 | Evaluation of wasatch fault segmentation and slip rates using lake Bonneville shorelines       | NA                                                             | 12 | Journal of Geophysical Research: Solid Earth                                                       | 10.1002/jgrb.50174 |

|      |                                                    |      |                                                                                                                                                             |                                                                                                                                                                    |    |                                                                         |                        |
|------|----------------------------------------------------|------|-------------------------------------------------------------------------------------------------------------------------------------------------------------|--------------------------------------------------------------------------------------------------------------------------------------------------------------------|----|-------------------------------------------------------------------------|------------------------|
| 1009 | Chowdhury S; Tripathi N                            | 2013 | Coastal erosion and accretion in Pak Phanang Thailand by GIS analysis of maps and satellite imagery                                                         | Coastal; Erosion-Accretion; GIS; Remote Sensing; Shoreline Dynamics                                                                                                | 4  | Songklanakarin Journal of Science and Technology                        | NA                     |
| 1010 | Ojala A; Palmu J; Åberg A; Åberg S; Virkki H       | 2013 | Development of an ancient shoreline database to reconstruct the Litorina sea maximum extension and the highest shoreline of the Baltic sea basin in Finland | Baltic Sea; Data Bases; Digital Terrain Models; Finland; Highest Shoreline; Holocene; Lakes; Litorina Sea; Raised Beaches; Sea-Level Changes; Uplifts; Weichselian | 31 | Bulletin of The Geological Society of Finland                           | 10.17741/bgsf/85.2.002 |
| 1011 | Wang X; Zhang H; Fu B; Shi A                       | 2013 | Analysis on the coastline change and erosion-accretion evolution of the Pearl river estuary China based on remote sensing images and nautical charts        | Remote-Sensing Image; Nautical Chart; Pearl River Estuary; Coastline Change; Erosion-Accretion Evolution.                                                          | 23 | Journal of Applied Remote Sensing                                       | 10.1117/1.JRS.7.073519 |
| 1012 | Pérez-Alberti A; Pires A; Freitas L; Chamine H     | 2013 | Shoreline change mapping along the coast of Galicia Spain                                                                                                   | Dynamics/Environment/Management                                                                                                                                    | 18 | Proceedings of The Institution of Civil Engineers: Maritime Engineering | 10.1680/maen.2012.23   |
| 1013 | Cenci L; Disperati L; Sousa L; Phillips M; Alves F | 2013 | Geomatics for integrated coastal zone management multitemporal shoreline analysis and future regional perspective for the Portuguese central region         | Coastal Erosion; Coastal Management; Erosion Rate; GIS; Landsat; Remote Sensing (RS); Shoreline Evolution; Shoreline Prediction                                    | 18 | Journal of Coastal Research                                             | 10.2112/SI65-228.1     |
| 1014 | Vassiljev J; Saarse L                              | 2013 | Timing of the Baltic ice lake in the eastern Baltic                                                                                                         | Absolute Age; Baltic Ice Lake; C-14; Deglaciation; Estonia; Ice-Marginal Features; Paleogeography; Quaternary; Sea-Level Changes                                   | 23 | Bulletin of The Geological Society of Finland                           | 10.17741/bgsf/85.1.001 |

|      |                                                   |      |                                                                                                  |                                                                                                                               |    |                                                                       |                                  |
|------|---------------------------------------------------|------|--------------------------------------------------------------------------------------------------|-------------------------------------------------------------------------------------------------------------------------------|----|-----------------------------------------------------------------------|----------------------------------|
| 1015 | Grudzinska I; Saarse L; Vassiljev J; Heinsalu A   | 2013 | Mid and late Holocene shoreline changes along the southern coast of the Gulf of Finland          | Absolute Age; C-14; Diatoms; Estonia; Holocene; Lake Sediments; Litorina Sea; Paleogeography; Sea-Level Changes; Stratigraphy | 11 | Bulletin of The Geological Society of Finland                         | 10.17741/bgsf/85.1.002           |
| 1016 | Liu Y; Huang H; Qiu Z; Fan J                      | 2013 | Detecting coastline change from satellite images based on beach slope estimation in a tidal flat | Beach Gradient; Coastlines; Remote Sensing; The Yellow River Delta; Volume Estimation                                         | 56 | International Journal of Applied Earth Observation and Geoinformation | 10.1016/j.jag.2012.12.005        |
| 1017 | Xu J; Zhang Z; Zhao X; Wen Q; Zuo L; Wang X; Yi L | 2013 | Spatia-ltemporal analysis of coastline changes in northern China from 2000 to 2012               | Coastline; Fractal Dimension; Northern China; Remote Sensing; Spatial-Temporal Change                                         | 19 | Dili Xuebao/Acta Geographica Sinica                                   | NA                               |
| 1018 | Nebel S; Trembanis A; Barber D                    | 2013 | Tropical cyclone frequency and barrier island erosion rates Cedar island Virginia                | Barrier Islands; Coastal; Eastern Shore; Hurricane; Tropical Storm; Virginia; Wachapreague                                    | 8  | Journal of Coastal Research                                           | 10.2112/JCOASTRES-D-11-00206.1   |
| 1019 | Del R L; Gracia F                                 | 2013 | Error determination in the photogrammetric assessment of shoreline changes                       | Aerial Photography; Coastal Erosion; Error; Photogrammetry; Shoreline Changes                                                 | 38 | Natural Hazards                                                       | 10.1007/s11069-012-0407-y        |
| 1992 | Da S L; Goncalves R; Lira M; Pereira P            | 2013 | Fuzzy modeling applied to coastal erosion vulnerability detection                                | Vulnerability To Coastal Erosion; Coastal Mapping; Fuzzy Modeling; Shoreline                                                  | 4  | Boletim De Ciencias Geodesicas                                        | 10.1590/S1982-217020130004000014 |

|      |                                     |      |                                                                                                                                                              |                                                                                                                                            |    |                                                                                          |                                |
|------|-------------------------------------|------|--------------------------------------------------------------------------------------------------------------------------------------------------------------|--------------------------------------------------------------------------------------------------------------------------------------------|----|------------------------------------------------------------------------------------------|--------------------------------|
| 2007 | Quan S; Kvitek R; Smith D; Griggs G | 2013 | Using vessel-based Lidar to quantify coastal erosion during El Nino and inter-El Nino periods in Monterey Bay California                                     | Shoreline Change; Erosion Rates; Seacliff Retreat; Bluff Retreat; Coastal Geomorphology; Remote Sensing; Coastal Processes; El Nino; LIDAR | 9  | Journal of Coastal Research                                                              | 10.2112/JCOASTRES-D-12-00005.1 |
| 2010 | Richter A; Faust D; Maas H          | 2013 | Dune cliff erosion and beach width change at the northern and southern spits of Sylt detected with multitemporal Lidar                                       | LIDAR; Multi-Temporal; Dune Cliff; Beach Width; Coastal Change Detection                                                                   | 34 | Catena                                                                                   | 10.1016/j.catena.2011.02.007   |
| 2031 | Kaimaris D; Papanikolaou N          | 2013 | Change detection in the physical lake shoreline through diachronic remote sensing data and GIS techniques: The case study of lake Orestiada Kastoria, Greece | Remote Sensing; Photogrammetry; GIS; Natural Sources; Shoreline Change Detection; Urban Growth; Lake Orestiada; Greece                     | 0  | Proceedings of The 13th International Conference on Environmental Science and Technology | NA                             |
| 888  | Aydin M; Uysal M                    | 2014 | Risk assessment of coastal erosion of Karasu coast in Black sea                                                                                              | Coastal Erosion; Coastline Change; Remote Sensing; Risk Assessment                                                                         | 13 | Journal of Coastal Conservation                                                          | 10.1007/s11852-014-0343-y      |
| 889  | Lo K; Gunasiri C                    | 2014 | Impact of coastal land use change on shoreline dynamics in Yunlin county, Taiwan                                                                             | Coastal Land Uses; GIS; Human Impact; Industrialization; Shoreline Change                                                                  | 13 | Environments - Mdpi                                                                      | 10.3390/environments1020124    |
| 890  | Choung Y; Yun H                     | 2014 | Development of a coastal surface monitoring system using high-resolution images taken in Haeundae, South Korea                                               | Coastal Surface Monitoring System; Coastlines; Coastlines; High-Resolution Images                                                          | 2  | Journal of Coastal Research                                                              | 10.2112/SI72-034.1             |
| 891  | Mahapatra M; Ratheesh R; Rajawat A  | 2014 | Shoreline change analysis along the coast of south Gujarat India using digital shoreline analysis system                                                     | DSAS Model; Erosion; Htl; Shoreline Change                                                                                                 | 34 | Journal of The Indian Society of Remote Sensing                                          | 10.1007/s12524-013-0334-8      |

|     |                                                                                        |      |                                                                                                                                                     |                                                                                                                        |    |                                                                |                              |
|-----|----------------------------------------------------------------------------------------|------|-----------------------------------------------------------------------------------------------------------------------------------------------------|------------------------------------------------------------------------------------------------------------------------|----|----------------------------------------------------------------|------------------------------|
| 892 | UsCinowicz G; Kramarska R; Kaulbarsz D; Jurys L; Frydel J; Przezdziecki P; Jegliński W | 2014 | Baltic sea coastal erosion: A case study from the Jastrzbia, Góra region                                                                            | Barrier and Cliff Coast; Coastal Erosion; Coastal Landslides; Coastal Protection; Southern Baltic Sea                  | 9  | Geologos                                                       | 10.2478/logos-2014-0018      |
| 893 | Kuenzer C; Ottinger M; Liu G; Sun B; Baumhauer R; Dech S                               | 2014 | Earth observation-based coastal zone monitoring of the Yellow river delta dynamics in China's second largest oil producing region over four decades | Coastal Zone; Environmental Impacts; Oil Industry; Remote Sensing; Shoreline Changes; Yellow River Delta               | 64 | Applied Geography                                              | 10.1016/j.apgeog.2014.08.015 |
| 894 | Demers A; Banks S; Pasher J; Duffe J                                                   | 2014 | Canadian Arctic shoreline mapping using Radarsat-2 and optical data through object-based classification                                             | Arctic; Classification; Coastal; Object-Based; SAR                                                                     | 1  | International Geoscience and Remote Sensing Symposium (IGARSS) | 10.1109/IGARSS.2014.6947653  |
| 895 | Guimaraes U; Rodrigues T; De L B T G M; Pamplona V                                     | 2014 | Change detection applied on shorelines in the mouth of Amazon river                                                                                 | Change Detection; Shorelines; Wetlands                                                                                 | 5  | International Geoscience and Remote Sensing Symposium (IGARSS) | 10.1109/IGARSS.2014.6946891  |
| 896 | Ozyavuz M; Donmez Y                                                                    | 2014 | Monitoring the changing position of coastlines using information technologies: An example of Tekirdag                                               | Coastal Management; Geographic Information System (GIS); Monitoring; Remote Sensing (RS); Urbanisation                 | 10 | Journal of Environmental Protection and Ecology                | NA                           |
| 897 | Ma H; Feng Y; Cui J; Li X; Qi L                                                        | 2014 | An analysis of shoreline changes in Liaohe river delta based on remote sensing and GIS technology                                                   | Cause Analysis; Liaohe River Delta; Remote Sensing; Shoreline Changes                                                  | 1  | Geological Bulletin of China                                   | NA                           |
| 898 | Gómez C; Wulder M; Dawson A; Ritchie W; Green D                                        | 2014 | Shoreline change and coastal vulnerability characterization with Landsat imagery: A case study in the outer Hebrides Scotland                       | Digital Shoreline Analysis System; Landsat; Scottish Outer Hebrides; Shoreline Change; Spatial Analysis; Vulnerability | 11 | Scottish Geographical Journal                                  | 10.1080/14702541.2014.923579 |

|     |                                                                       |      |                                                                                                                   |                                                                                             |    |                                       |                              |
|-----|-----------------------------------------------------------------------|------|-------------------------------------------------------------------------------------------------------------------|---------------------------------------------------------------------------------------------|----|---------------------------------------|------------------------------|
| 899 | Bouchahma M; Yan W                                                    | 2014 | Monitoring shoreline change on Djerba island using GIS and multitemporal satellite data                           | Djerba; DSAS; GIS; Landsat Tm; Shoreline Changemeasurement                                  | 21 | Arabian Journal of Geosciences        | 10.1007/s12517-013-1052-9    |
| 900 | Tran T V; Tien T X A; Phan N H; Dahdouh-Guebas F; Koedam N            | 2014 | Application of remote sensing and GIS for detection of longterm mangrove shoreline changes in Mui Ca Mau, Vietnam | NA                                                                                          | 57 | Biogeosciences                        | 10.5194/bg-11-3781-2014      |
| 901 | Houser C; Dambrosio T; Bouchard C; Heyman W; Darbonne K; Kuykendall S | 2014 | Erosion and reorientation of the Sapodilla Cays, mesoamerican Reef Belize from 1960 to 2012                       | Belize; Reef Islands; Sapodilla Cays; Sea-Level Rise; Shoreline Change                      | 8  | Physical Geography                    | 10.1080/02723646.2014.913932 |
| 902 | Mane N; Balaji R                                                      | 2014 | Assessment of shoreline oscillations along south Gujarat coastline India                                          | Accretion; ARCGIS; Erosion; Landsat Etm+; Shoreline                                         | 2  | Indian Journal of Geo-Marine Sciences | NA                           |
| 903 | Sankar S; Ravichandran V; Venkatarao D; Badrinarayanan S              | 2014 | Mapping of spatial and temporal variation of shoreline in Poompuhar using comprehensive approach                  | Accretion; Coastal Dynamics; Coastal Geomorphology; Coastal Zones; Erosion; Shoreline       | 1  | Indian Journal of Geo-Marine Sciences | NA                           |
| 904 | Chenthamilselvan S; Kankara R; Rajan B                                | 2014 | Assessment of shoreline changes along Karnataka coast India using GIS remote sensing techniques                   | Erosion and Accretion; Satellite Images; Weighted Linear Regression Rate and End Point Rate | 26 | Indian Journal of Geo-Marine Sciences | NA                           |
| 905 | Tirodkar G; Pathak K; Vaz S                                           | 2014 | Coastal changes along the coast of Tadri river Karnataka west coast of India and its implication                  | Coastline Changes; CRZ; Geomorphology; High Water Line; Remote Sensing                      | 0  | Indian Journal of Geo-Marine Sciences | NA                           |
| 906 | Kankara R; Chenthamil S; Rajan B; Arockiaraj S                        | 2014 | An adaptive approach to monitor the shoreline changes in ICZM framework: A case study of Chennai coast            | Accretion; Erosion; Satellite Imagery; Weighted Linear Regression Rate and End Point Rate   | 19 | Indian Journal of Geo-Marine Sciences | NA                           |
| 907 | Mascarenhas A; Murali R                                               | 2014 | Impact of shipwrecks on the morphology of world coasts: A review                                                  | Coastline; Goa; Mv River Princess; Satellite Images; Shipwrecks                             | 0  | Indian Journal of Geo-Marine Sciences | NA                           |

|     |                                                                                    |      |                                                                                                                                                                      |                                                                                                                                      |    |                                                                                         |                                      |
|-----|------------------------------------------------------------------------------------|------|----------------------------------------------------------------------------------------------------------------------------------------------------------------------|--------------------------------------------------------------------------------------------------------------------------------------|----|-----------------------------------------------------------------------------------------|--------------------------------------|
| 908 | Gao Z; Liu X; Ning J; Lu Q                                                         | 2014 | Analysis on changes in coastline and reclamation area and its causes based on 30year satellite data in China                                                         | China; Coastal Reclamation; Coastline; Consolidation; Land Use; Remote Sensing; Variation                                            | 30 | Nongye Gongcheng Xuebao/Transactions of The Chinese Society of Agricultural Engineering | 10.3969/j.issn.1002-6819.2014.12.017 |
| 909 | Natesan U; Rajalakshmi P; Ferrer V                                                 | 2014 | Shoreline dynamics and littoral transport around the tidal inlet at Pulicat southeast coast of India                                                                 | Geographical Information System; Satellite Data; Sediment Dynamics; Sediment Trend Analysis; Shoreline Oscillation; Tidal Inlets     | 11 | Continental Shelf Research                                                              | 10.1016/j.csr.2014.02.018            |
| 910 | Pardo-Pascual J; Almonacid-Caballer J; Ruiz L; Palomar-Vázquez J; Rodrigo-Aleman R | 2014 | Evaluation of storm impact on sandy beaches of the Gulf of Valencia using Landsat imagery series                                                                     | Beach Change; GIS Tools; Landsat Imagery; Recovery Processes; Remote Sensing; Shoreline Evolution; Storm Impact                      | 25 | Geomorphology                                                                           | 10.1016/j.geomorph.2014.02.020       |
| 911 | Kaliraj S; Chandrasekar N; Magesh N                                                | 2014 | Impacts of wave energy and littoral currents on shoreline erosion-accretion along the southwest coast of Kanyakumari Tamil Nadu using DSAS and geospatial technology | Coastal Erosion; DSAS; India; Kanyakumari; Littoral Current; Remote Sensing and GIS; Shoreline Change; South-West Coast; Wave Energy | 44 | Environmental Earth Sciences                                                            | 10.1007/s12665-013-2845-6            |
| 912 | Li X; Zhou Y; Zhang L; Kuang R                                                     | 2014 | Shoreline change of Chongming Dongtan and response to river sediment load a remote sensing assessment                                                                | Chongming Dongtan; Dam; Remote Sensing; Sediment Load; Shoreline Change; Yangtze River Delta                                         | 56 | Journal of Hydrology                                                                    | 10.1016/j.jhydrol.2014.02.013        |
| 913 | Bugajny N; Furmańczyk K                                                            | 2014 | Dune coast changes caused by weak storm events in Miedzywodzie Poland                                                                                                | Beach Volume Changes; Dune Coast; Rtk-GPS; Shoreline Displacement;                                                                   | 6  | Journal of Coastal Research                                                             | 10.2112/SI70-036.1                   |



Southern Baltic Coast;  
Storm Events

|     |                                                                                                                               |      |                                                                                                      |                                                                                                                       |    |                                      |                                |
|-----|-------------------------------------------------------------------------------------------------------------------------------|------|------------------------------------------------------------------------------------------------------|-----------------------------------------------------------------------------------------------------------------------|----|--------------------------------------|--------------------------------|
| 914 | Puig M; Del R L;<br>Plomaritis T; Benavente J                                                                                 | 2014 | Influence of storms on coastal retreat in SW Spain                                                   | Aerial Photographs;<br>Coastal Erosion;<br>Coastal Evolution;<br>Coastal Storms; Gulf of Cadiz                        | 5  | Journal of Coastal Research          | 10.2112/SI70-033.1             |
| 915 | Araújo M; Bona S; Trigo-Teixeira A                                                                                            | 2014 | Impact of detached breakwaters on shoreline evolution: A case study on the Portuguese west coast     | Coastal Erosion;<br>Genesis Model;<br>LIDAR Data;<br>Sediment Shortage;<br>Shoreline Prediction;<br>Shoreline Retreat | 6  | Journal of Coastal Research          | 10.2112/SI70-008.1             |
| 916 | Jabaloy-Sánchez A; Lobo F; Azor A; Martín-Rosales W; Pérez-Peña J; Bárcenas P; Macías J; Fernández-Salas L; Vázquez-Vílchez M | 2014 | Six thousand years of coastline evolution in the Guadalfeo deltaic system southern Iberian Peninsula | Bathymetry;<br>Coastline Changes;<br>Damming; GIS;<br>Guadalfeo River Delta; River DiveRSion                          | 30 | Geomorphology                        | 10.1016/j.geomorph.2013.08.037 |
| 917 | Merlotto A; Bértola G; Isla F; Cortizo L; Piccolo M                                                                           | 2014 | Short and mediumterm coastal evolution of necochea municipality Buenos Aires province Argentina      | Beach Profile;<br>Coastal Evolution;<br>Coastline; Necochea; Quequén                                                  | 8  | Environmental Earth Sciences         | 10.1007/s12665-013-2525-6      |
| 918 | Xu J; Zhang Z; Zhao X; Wen Q; Zuo L; Wang X; Yi L                                                                             | 2014 | Spatial and temporal variations of coastlines in northern China 2000-2012                            | Coastline; Fractal Dimension;<br>Northern China;<br>Remote Sensing;<br>Spatial-Temporal Change                        | 17 | Journal of Geographical Sciences     | 10.1007/s11442-014-1070-x      |
| 919 | Kannan R; Anand K; Sundar V; Sannasiraj S; Rangarao V                                                                         | 2014 | Shoreline changes along the northern coast of Chennai port from field measurements                   | Beach Profile;<br>Coastal Morphology;<br>Field Survey; Rtk-GPS; Shoreline                                             | 4  | Ish Journal of Hydraulic Engineering | 10.1080/09715010.2013.821789   |

|     |                                                               |      |                                                                                                                                    |                                                                                                                |   |                                                                                                 |                              |
|-----|---------------------------------------------------------------|------|------------------------------------------------------------------------------------------------------------------------------------|----------------------------------------------------------------------------------------------------------------|---|-------------------------------------------------------------------------------------------------|------------------------------|
| 920 | Hasan G; Takewaka S                                           | 2014 | Foreshore applications of Xband radar                                                                                              | High Frequency Radar; Japanese Meteorological Agency; Shoreline Position; Surf Zone; Swash Zone                | 0 | Coastal Research Library                                                                        | 10.1007/978-3-319-06326-3_7  |
| 921 | Manivanan R                                                   | 2014 | Advancement of technology for detecting shoreline changes in east coast of India and comparison with prototype behavior            | Littoral Drift; Longshore Sediment Transport; Mathematical Modelling Technique; Shoreline Change; Wave Climate | 0 | Coastal Research Library                                                                        | 10.1007/978-3-319-06326-3_16 |
| 922 | Rigos A; Vousdoukas M; Andreadis O; Tsekouras G; Velegrakis A | 2014 | On the systematic implementation of Artificial Neural Networks in the classification of variance images and shoreline extraction   | Coastal Morphodynamics; Fuzzy Clustering; RBF Neural Networks Radial Basis Function Networks; Remote Sensing   | 6 | Fresenius Environmental Bulletin                                                                | NA                           |
| 923 | Drakopoulos P; Ghionis G; Lazogiannis K; Poulos S             | 2014 | Toward precise shoreline detection and extraction from remotely sensed images with the use of wet and dry sand spectral signatures | Environmental Monitoring; Remote Sensing; Shoreline Position                                                   | 1 | Fresenius Environmental Bulletin                                                                | NA                           |
| 924 | Choi J; Choi C; Yun M; Ahn H                                  | 2014 | Spatial analysis of the Taeae shoreline change using satellite image and GIS                                                       | Change Detection; DSAS; Kompsat-2; LIDAR; Shoreline                                                            | 0 | 35th Asian Conference on Remote Sensing 2014, ACRS 2014: Sensing For Reintegration of Societies | NA                           |

|     |                                                |      |                                                                                                                                                  |                                                                                            |    |                                                                                                 |                    |
|-----|------------------------------------------------|------|--------------------------------------------------------------------------------------------------------------------------------------------------|--------------------------------------------------------------------------------------------|----|-------------------------------------------------------------------------------------------------|--------------------|
| 925 | Kim B; Yun K                                   | 2014 | Longterm shoreline changes on the Baeksajang beach west coast of Korea                                                                           | Aerial Photographs; Digital Photogrammetry; Rate of Shoreline Changes                      | 0  | 35th Asian Conference on Remote Sensing 2014, ACRS 2014: Sensing For Reintegration of Societies | NA                 |
| 926 | Zhang X; Pan D; Chen J; Zhao J; Zhu Q; Huang H | 2014 | Evaluation of coastline changes under human intervention using multitemporal high-resolution images: a case study of the Zhoushan islands, China | Coastline Change; Geographic Information Systems; Island; Land Reclamation; Remote Sensing | 30 | Remote Sensing                                                                                  | 10.3390/rs6109930  |
| 927 | Li L; Zhong C; Kong F                          | 2014 | The coastline remote sensing survey for Zhao Shu island in Xisha islands based on WorldView-2                                                    | Coastline Changes; Coastline Extraction; Remote Sensing Survey; Wordview-2; Xisha Islands  | 1  | Proceedings of Spie - The International Society For Optical Engineering                         | 10.1117/12.2069483 |
| 928 | Liu X; Gao Z; Ning J; Lu Q                     | 2014 | Dynamic analysis on coastline and sea reclamation in the region around Bohai based on remote sensing images                                      | Coastline; GIS; Reclamation; Remote Sensing; The Bohai Rim                                 | 1  | Proceedings of Spie - The International Society For Optical Engineering                         | 10.1117/12.2058414 |
| 929 | You C; Gao Z; Ning J                           | 2014 | Spatialtemporal analysis of coastline changes around Bohai sea based on remote sensing in recent 20a                                             | Bohai Sea; Coastline; GIS; Remote Sensing                                                  | 1  | Proceedings of Spie - The International Society For Optical Engineering                         | 10.1117/12.2058944 |

|     |                                                                                                                                           |      |                                                                                                           |                                                                                                                              |    |                                                                                                                                     |                                          |
|-----|-------------------------------------------------------------------------------------------------------------------------------------------|------|-----------------------------------------------------------------------------------------------------------|------------------------------------------------------------------------------------------------------------------------------|----|-------------------------------------------------------------------------------------------------------------------------------------|------------------------------------------|
| 930 | Rajawat A; Chauhan H;<br>Ratheesh R; Rhode S;<br>Bhanderi R; Mahapatra M;<br>Kumar M; Yadav R;<br>Abraham S; Singh S;<br>Keshri K; Ajai A | 2014 | Assessment of coastal erosion<br>along Indian coast on 1:25,000<br>scale using satellite data             | Accretion; Coastal<br>Erosion; Coastal<br>Protection; Highest<br>High Tide Line; IRS;<br>LISS-IV; Shoreline<br>Changes       | 9  | International<br>Archives of The<br>Photogrammetry,<br>Remote Sensing<br>and Spatial<br>Information<br>Sciences - ISPRS<br>Archives | 10.5194/isprSARchives-XL-8-<br>119-2014  |
| 931 | Tochamnanvit T;<br>Muttitanon W                                                                                                           | 2014 | Investigation of coastline<br>changes in three provinces of<br>Thailand using remote sensing              | Change Detection<br>Technique; Coastline<br>Changes; Fusion<br>Technique; Principal<br>Component Analysis;<br>Remote Sensing | 7  | International<br>Archives of The<br>Photogrammetry,<br>Remote Sensing<br>and Spatial<br>Information<br>Sciences - ISPRS<br>Archives | 10.5194/isprSARchives-XL-8-<br>1079-2014 |
| 932 | Thomas J; Arunachalam A;<br>Jaiswal R; Diwakar P;<br>Kiran B                                                                              | 2014 | Dynamic land use and coastline<br>changes in active estuarine<br>regions a study of Sundarban<br>delta    | Climate Change;<br>GIS; Remote<br>Sensing; Sea Level<br>Rise; Shoreline<br>Analysis;<br>Vulnerability                        | 4  | International<br>Archives of The<br>Photogrammetry,<br>Remote Sensing<br>and Spatial<br>Information<br>Sciences - ISPRS<br>Archives | 10.5194/isprSARchives-XL-8-<br>133-2014  |
| 933 | Mendonça F; Gonçalves R;<br>Awange J; Da S L; Das G<br>M                                                                                  | 2014 | Temporal shoreline series<br>analysis using GNSS análise<br>temporal da linha de costa<br>utilizando GNSS | Coastal Erosion;<br>Coastal Settlement;<br>Gnss; Monitoring;<br>Shoreline                                                    | 11 | Boletim De<br>Ciencias<br>Geodesicas                                                                                                | 10.1590/S1982-<br>21702014000300040      |
| 934 | Tamassoki E; Amiri H;<br>Soleymani Z                                                                                                      | 2014 | Monitoring of shoreline changes<br>using remote sensing: case study<br>coastal city of Bandar Abbas       | NA                                                                                                                           | 15 | IOP Conference<br>Series: Earth and<br>Environmental<br>Science                                                                     | 10.1088/1755-<br>1315/20/1/012023        |

|     |                                                             |      |                                                                                                                  |                                                                                                                                                 |    |                                                          |                                             |
|-----|-------------------------------------------------------------|------|------------------------------------------------------------------------------------------------------------------|-------------------------------------------------------------------------------------------------------------------------------------------------|----|----------------------------------------------------------|---------------------------------------------|
| 935 | Hussain M; Tajima Y;<br>Gunasekara K; Rana S;<br>Hasan R    | 2014 | Recent coastline changes at the eastern part of the Meghna estuary using PALSAR and Landsat images               | NA                                                                                                                                              | 13 | IOP Conference Series: Earth and Environmental Science   | 10.1088/1755-1315/20/1/012047               |
| 936 | Zhu L; Wu J; Xu Z; Xu Y;<br>Lin J; Hu R                     | 2014 | Coastline movement and change along the Bohai sea from 1987 to 2012                                              | Bohai Sea; Coastline Change; Coastline Type; Remote Sensing                                                                                     | 15 | Journal of Applied Remote Sensing                        | 10.1117/1.JRS.8.083585                      |
| 937 | Görmüş K; Kutoğlu H;<br>Şeker D; Özölçer I; Oruç M; Aksoy B | 2014 | Temporal analysis of coastal erosion in Turkey: A case study Karasu coastal region                               | Black Sea; Coastal Erosion; Coastal Structures; GPS; Harbour; Ikonos; Karasu; Landsat; Tourism                                                  | 14 | Journal of Coastal Conservation                          | 10.1007/s11852-014-0325-0                   |
| 938 | Baykal C; Ergin A; Güler I                                  | 2014 | Twodimensional depthaveraged beach evolution modeling: case study of the Kizilirmak river mouth, Turkey          | Beach Evolution; Numerical Modeling; Sediment Transport; Spectral Waves; Wave-Induced Circulation                                               | 2  | Journal of Waterway, Port, Coastal and Ocean Engineering | 10.1061/(ASCE)WW.1943-5460.0000243          |
| 939 | Mann T; Westphal H                                          | 2014 | Assessing longterm changes in the beach width of reef islands based on temporally fragmented remote sensing data | Digital Shoreline Analysis System; Pacific Ocean; Quickbird; Seawall; Sediment Dynamics; Shoreline Change; Small Islands; Takú Atoll; Worldview | 38 | Remote Sensing                                           | 10.3390/rs6086961                           |
| 940 | Kabuth A; Kroon A;<br>Pedersen J                            | 2014 | Multidecadal shoreline changes in Denmark                                                                        | Coastal Erosion; Coastal Landform; Digital Shoreline Analysis System; DSAS; GIS                                                                 | 24 | Journal of Coastal Research                              | 10.2112/JCOASTRES-D-13-00139.1              |
| 941 | Yang H; Li Y; Wei J                                         | 2014 | Yellow river estuary coastline change analysis before and after the water and sediment regulation in 12 years    | Coastline Changes; Remote Sensing; Water and Sediment Regulation; Yellow River Estuary                                                          | 0  | Advanced Materials Research                              | 10.4028/www.scientific.net/AMR.955-959.3883 |

|     |                                                |      |                                                                                                                                     |                                                                                    |    |                                                                                                            |                                              |
|-----|------------------------------------------------|------|-------------------------------------------------------------------------------------------------------------------------------------|------------------------------------------------------------------------------------|----|------------------------------------------------------------------------------------------------------------|----------------------------------------------|
| 942 | Meng W; Hu B; Wang Z                           | 2014 | Coastal wetland degradation and its restoration planning incorporating landscape and ecological processes in Tianjin northern China | Coastal Wetland Salt MaRSh Shoreline Change Ecological Integrity Ecosystem Process | 2  | Advanced Materials Research                                                                                | 10.4028/www.scientific.net/A MR.955-959.4123 |
| 943 | Anitha P; Usha N                               | 2014 | Assessment of short term shoreline changes along Tuticorin southeast coast of India using geospatial techniques                     | DSAS; Erosion/Accretion; GIS; India; Shoreline Changes; Tuticorin Coast            | 0  | Disaster Advances                                                                                          | NA                                           |
| 944 | Ding X; Li X                                   | 2014 | SAR monitoring of coastline change in Shanghai China                                                                                | NA                                                                                 | 0  | IOP Conference Series: Earth and Environmental Science                                                     | 10.1088/1755-1315/17/1/012113                |
| 945 | Dong D; Li Z; Liu Z; Yu Y                      | 2014 | Automated techniques for quantification of coastline change rates using Landsat imagery along CaoFeidian, China                     | NA                                                                                 | 1  | IOP Conference Series: Earth and Environmental Science                                                     | 10.1088/1755-1315/17/1/012103                |
| 946 | Pantanahiran W                                 | 2014 | Monitoring coastal change after the tsunami in Thailand                                                                             | NA                                                                                 | 3  | IOP Conference Series: Earth and Environmental Science                                                     | 10.1088/1755-1315/17/1/012108                |
| 947 | Kundu S; Mondal A; Khare D; Mishra P; Shukla R | 2014 | Shifting shoreline of Sagar island delta, India                                                                                     | EPR Model; GIS; Land Water Boundary; Sagar Island Delta; Shoreline Mapping         | 16 | Journal of Maps                                                                                            | 10.1080/17445647.2014.922131                 |
| 948 | Tarmizi N; Samad A; Yusop M                    | 2014 | Shoreline data extraction from Quick-Bird satellite image using semi-automatic technique                                            | Data Extraction; Semi-Automatic Technique; Shoreline                               | 7  | Proceedings - 2014 IEEE 10th International Colloquium on Signal Processing and Its Applications, Cspa 2014 | 10.1109/CSPA.2014.6805739                    |

|     |                                                        |      |                                                                                                                                                         |                                                                                                                         |    |                                                 |                               |
|-----|--------------------------------------------------------|------|---------------------------------------------------------------------------------------------------------------------------------------------------------|-------------------------------------------------------------------------------------------------------------------------|----|-------------------------------------------------|-------------------------------|
| 949 | Jana A; Biswas A; Maiti S; Bhattacharya A              | 2014 | Shoreline changes in response to sea level rise along Digha coast eastern India an analytical approach of remote sensing GIS and statistical techniques | End-Point Rate; Landsat; Linear Regression; Sea Level Rise (Slr); Shoreline Change Rate                                 | 33 | Journal of Coastal Conservation                 | 10.1007/s11852-013-0297-5     |
| 950 | Theuerkauf E; Rodriguez A                              | 2014 | Evaluating proxies for estimating sub-aerial beach volume change across increasing time scales and various morphologies                                 | Beach Morphologic Variability Beach Cusps; Beach Nourishment; Beach Profiles; Shoreline Change                          | 10 | Earth Surface Processes and Landforms           | 10.1002/esp.3467              |
| 951 | Andredaki M; Georgoulas A; Hrissanthou V; Kotsovinos N | 2014 | Assessment of reservoir sedimentation effect on coastal erosion in the case of Nestos river Greece                                                      | Coastal Erosion; Nestos River; Reservoir Sedimentation; Sediment Transport; Shoreline Change Monitoring                 | 22 | International Journal of Sediment Research      | 10.1016/S1001-6279(14)60020-2 |
| 952 | Fadahunsi O; Pe'Eri S; Armstrong A                     | 2014 | Characterisation of the Nigerian shoreline making use of publicly available satellite imagery                                                           | NA                                                                                                                      | 0  | Hydro International                             | NA                            |
| 953 | Cheng L; Tong L; Liu Y; Li M; Wang J                   | 2014 | Automatic registration of coastal remotely sensed imagery by affine invariant feature matching with shoreline constraint                                | Affine Invariant Matching; Coastal Remote Sensing; Filtering; Image ReGIStration; Shoreline Constraint                  | 5  | Marine Geodesy                                  | 10.1080/01490419.2013.868382  |
| 954 | Wang Y; Hou X; Jia M; Shi P; Yu L                      | 2014 | Remote detection of shoreline changes in eastern bank of Laizhou Bay north China                                                                        | Automatic Thresholding; Coastal Erosion; Land Reclamation; Shoreline Change                                             | 8  | Journal of The Indian Society of Remote Sensing | 10.1007/s12524-014-0361-0     |
| 955 | Yousef A; Iftekharuddin K; Karim M                     | 2014 | Shoreline extraction from light detection and ranging digital elevation model data and aerial images                                                    | Digital Elevation Models; Light Detection and Ranging; Monte-Carlo Simulations; Remote Sensing; Support Vector Machines | 8  | Optical Engineering                             | 10.1117/1.OE.53.1.011006      |

|      |                                                         |      |                                                                                                                                                 |                                                                                                                                             |    |                                                               |                                 |
|------|---------------------------------------------------------|------|-------------------------------------------------------------------------------------------------------------------------------------------------|---------------------------------------------------------------------------------------------------------------------------------------------|----|---------------------------------------------------------------|---------------------------------|
| 956  | Deepika B; Avinash K; Jayappa K                         | 2014 | Shoreline change rate estimation and its forecast remote sensing geographical information system and statistics-based approach                  | Coastal Management; Correlation Coefficient; Human Intervention; Linear Regression; Littoral Cell; Root-Mean-Square Error                   | 37 | International Journal of Environmental Science and Technology | 10.1007/s13762-013-0196-1       |
| 1950 | Mendonca F; Goncalves R; Awange J; Da S L; Gregorio M   | 2014 | Temporal shoreline series analysis using GNSS                                                                                                   | Shoreline; Monitoring; Gns; Coastal Erosion; Coastal Settlement                                                                             | 7  | Boletim De Ciencias Geodesicas                                | 10.1590/S1982-21702014000300040 |
| 1951 | El-Asmar H; El-Kafrawy S; Taha M                        | 2014 | Monitoring coastal changes along Damietta Promontory and the barrier beach toward port Said east of the Nile delta, Egypt                       | Damietta Promontory; Barrier Beach; Oil and Gas Industries; East Nile Delta; Remote Sensing                                                 | 9  | Journal of Coastal Research                                   | 10.2112/JCOASTRES-D-12-00112.1  |
| 1963 | Sekovski I; Stecchi F; Mancini F; Del R L               | 2014 | Image classification methods applied to shoreline extraction on very high-resolution multispectral imagery                                      | NA                                                                                                                                          | 36 | International Journal of Remote Sensing                       | 10.1080/01431161.2014.907939    |
| 1965 | Foyle A                                                 | 2014 | Groundwater flux as a determinant of coastal zone upland loss: A case study from the Pennsylvania coast of lake Erie USA                        | Coastal Erosion; Groundwater Flux; Climate Change; Bluff Retreat; Pennsylvania; USA                                                         | 3  | Environmental Earth Sciences                                  | 10.1007/s12665-013-2849-2       |
| 1971 | Vassilakis E; Papadopoulou-Vrynioti K                   | 2014 | Quantification of deltaic coastal zone change based on multitemporal high resolution earth observation techniques                               | Historical Remote Sensing Data Interpretation; Digital Shoreline Analysis; Beach Erosion Rates; Real Time Kinematics (Rtk) GPS Applications | 6  | ISPRS International Journal of Geo-Information                | 10.3390/ijgi3010018             |
| 1976 | Tonisson H; Aps R; Orviku K; Suursaar U; Sasi S; Kont A | 2014 | The impact of a port to the surrounding shores based on the 10 years monitoring results port of Sillamae: case study Gulf of Finland Baltic sea | NA                                                                                                                                          | 1  | 2014 IEEE/OES Baltic International Symposium (Baltic)         | 10.1109/BALTIC.2014.6887858     |



|      |                                                                                                                           |      |                                                                                                                                       |                                                                                                                  |    |                                                                |                                 |
|------|---------------------------------------------------------------------------------------------------------------------------|------|---------------------------------------------------------------------------------------------------------------------------------------|------------------------------------------------------------------------------------------------------------------|----|----------------------------------------------------------------|---------------------------------|
| 1984 | Darsan J                                                                                                                  | 2014 | Digital mapping of the coastline evolution of Cocos Bay Manzanilla, Trinidad                                                          | Barrier Beach; Coastline Change; Erosion Rate; GIS; DSAS; Nariva Swamp                                           | 0  | Caribbean Journal of Science                                   | 10.18475/cjos.v48i3.a07         |
| 820  | Zagórski P; Rodzik J; Moskalik M; Strzelecki M; Lim M; Błaszczyk M; Promińska A; Kruszewski G; Styszyńska A; Malczewski A | 2015 | Multidecadal 1960-2011 shoreline changes in Isbjørnhamna Hornsund, Svalbard                                                           | Arctic; Coastal Erosion; Fjord System; Sea-Ice; Shore Ice; Spitsbergen                                           | 23 | Polish Polar Research                                          | 10.1515/popore-2015-0019        |
| 821  | Earlie C; Masselink G; Russell P; Shail R                                                                                 | 2015 | Application of airborne Lidar to investigate rates of recession in rocky coast environments                                           | Airborne LIDAR; Cliff Erosion; Digital Elevation Model; Rocky Coastlines                                         | 21 | Journal of Coastal Conservation                                | 10.1007/s11852-014-0340-1       |
| 822  | Guneroglu A                                                                                                               | 2015 | Coastal changes and land use alteration on northeastern part of Turkey                                                                | Coastline; DSAS; Land Alteration; Remote Sensing; SVM                                                            | 22 | Ocean and Coastal Management                                   | 10.1016/j.ocecoaman.2015.06.019 |
| 823  | Ozturk D; Sesli F                                                                                                         | 2015 | Shoreline change analysis of the Kizilirmak lagoon series                                                                             | Delta; EPR; Lagoon; NSM; SCE; SDI; Shoreline Change                                                              | 40 | Ocean and Coastal Management                                   | 10.1016/j.ocecoaman.2015.03.009 |
| 824  | Cenci L; Persichillo M; Disperati L; Oliveira E; Alves F; Pulvirenti L; Rebora N; Boni G; Phillips M                      | 2015 | Remote sensing for coastal risk reduction purposes optical and microwave data fusion for shoreline evolution monitoring and modelling | Coastal Evolution Modelling; Coastal Risk Management; Optical/SAR Data Fusion; Remote Sensing; Shoreline Mapping | 5  | International Geoscience and Remote Sensing Symposium (IGARSS) | 10.1109/IGARSS.2015.7326043     |
| 825  | Suwanprasit C                                                                                                             | 2015 | Effects of near shore land use dynamic on coastal erosion in Phuket, Thailand                                                         | Coastal Erosion; Land-Use Change; Remote Sensing; Shoreline Change; Support Vector Machines                      | 1  | International Geoscience and Remote Sensing Symposium (IGARSS) | 10.1109/IGARSS.2015.7326912     |
| 826  | Murali R; Dhiman R; Choudhary R; Seelam J; Ilangovan D; Vethamony P                                                       | 2015 | Decadal shoreline assessment using remote sensing along the central Odisha coast India                                                | Accretion; DSAS; Erosion; Odisha Coast; Remote Sensing; Shoreline Mapping                                        | 32 | Environmental Earth Sciences                                   | 10.1007/s12665-015-4698-7       |

|     |                                                                         |      |                                                                                                                                                                                                                                                             |                                                                                                                 |    |                                                                        |                                |
|-----|-------------------------------------------------------------------------|------|-------------------------------------------------------------------------------------------------------------------------------------------------------------------------------------------------------------------------------------------------------------|-----------------------------------------------------------------------------------------------------------------|----|------------------------------------------------------------------------|--------------------------------|
| 827 | Gallop S; Bosserelle C;<br>Haigh I; Wadey M;<br>Pattiaratchi C; Eliot I | 2015 | The impact of temperate reefs on 34years of shoreline and vegetation line stability at Yanchep southwestern Australia and implications for coastal setback                                                                                                  | Beach Dynamics;<br>Coastal Morphology;<br>Coastal Setback;<br>Perched Beach;<br>Sandy Coast;<br>Temperate Reefs | 14 | Marine Geology                                                         | 10.1016/j.margeo.2015.09.001   |
| 828 | Ozturk D; Beyazit I; Kilic F                                            | 2015 | Spatiotemporal analysis of shoreline changes of the Kizilirmak delta                                                                                                                                                                                        | Change Detection;<br>Coastal Erosion;<br>EPR; LRR; SCE                                                          | 19 | Journal of Coastal Research                                            | 10.2112/JCOASTRES-D-14-00159.1 |
| 829 | Heathfield D; Walker I                                                  | 2015 | Evolution of a foredune and backshore river complex on a high-energy, drift-aligned beach                                                                                                                                                                   | Bluff; Coastal Erosion; Drift-Aligned; Foredune; LIDAR; River; Wave-Dominated                                   | 6  | Geomorphology                                                          | 10.1016/j.geomorph.2015.08.006 |
| 830 | Crapoulet A; Héquette A;<br>Levoy F; Bretel P                           | 2015 | Assessment of shoreline change and coastal sediment budget in the Bay of Wissant northern France using airborne Lidar evaluation de l'évolution du trait de côte et du bilan sédimentaire littoral en baie de wissant nord de la France par Lidar aéroporté | Bay of Wissant;<br>Coastal Dunes;<br>Coastal Sediment Budget; Shoreline Evolution;<br>Topographic LIDAR         | 5  | Geomorphologie: Relief, Processus, Environnement                       | 10.4000/geomorphologie.11146   |
| 831 | Maulud K; Rafar R                                                       | 2015 | Determination the impact of sea level rise to shoreline changes using GIS                                                                                                                                                                                   | Erosion and Spatial Model; Geographic Information System (GIS); Sea Level Rise; Shoreline Changes               | 6  | International Conference on Space Science and Communication, Iconspace | 10.1109/IconSpace.2015.7283798 |
| 832 | Swirad Z; Rees W                                                        | 2015 | Geomorphometric analysis of a rocky coastline an example from Hornsund, Svalbard                                                                                                                                                                            | Coastline;<br>Geomorphometry;<br>Gnu Octave;<br>Svalbard; Line Generalisation                                   | 2  | International Journal of Geographical Information Science              | 10.1080/13658816.2015.1061131  |
| 833 | Ford M; Kench P                                                         | 2015 | Multidecadal shoreline changes in response to sea level rise in the Marshall Islands                                                                                                                                                                        | Adaptation; Atoll Nations; Reef Islands; Sea Level Rise; Shoreline Change                                       | 43 | Anthropocene                                                           | 10.1016/j.ancene.2015.11.002   |

|     |                                                      |      |                                                                                                                                        |                                                                                                                                                                        |    |                                           |                                |
|-----|------------------------------------------------------|------|----------------------------------------------------------------------------------------------------------------------------------------|------------------------------------------------------------------------------------------------------------------------------------------------------------------------|----|-------------------------------------------|--------------------------------|
| 834 | Sitkiewicz P; Wróblewski R; Rudowski S               | 2015 | The dune coast, the state just prior to the construction of hard engineering protection structures Ustkajarosawiec the southern Baltic | Abrasion; Coastal Management; GIS; Morphological Changes; Polish Seashore                                                                                              | 0  | Oceanological and Hydrobiological Studies | 10.1515/ohs-2015-0034          |
| 835 | Curran C; Davis J; Baron L; Malhotra A; Fonseca M    | 2015 | Shoreline change in the new river estuary North Carolina rates and consequences                                                        | Coastal Erosion; Estuarine Shoreline; Salt Marsh; Sediment Supply; Sheltered Coast                                                                                     | 24 | Journal of Coastal Research               | 10.2112/JCOASTRES-D-14-00127.1 |
| 836 | Dada O; Qiao L; Ding D; Li G; Ma Y; Wang L           | 2015 | Evolutionary trends of the Niger delta shoreline during the last 100years responses to rainfall and river discharge                    | Climate Change; Coastline Change; Niger Delta; Niger River; River Discharge                                                                                            | 17 | Marine Geology                            | 10.1016/j.margeo.2015.06.007   |
| 837 | Maglione P; Parente C; Vallario A                    | 2015 | High resolution satellite images to reconstruct recent evolution of Domitian coastline                                                 | Coastline Changes; Digital Mapping; Domitian Coastal Zone; Geoinformatics; High Resolution Satellite Images; Positional Accuracy; Remote Sensing; Variance Propagation | 18 | American Journal of Applied Sciences      | 10.3844/ajassp.2015.506.515    |
| 838 | Davies-Vollum K; West M                              | 2015 | Shoreline change and sea level rise at the Muni Pomadze coastal wetland Ramsar site, Ghana                                             | Africa; Ghana; Sea Level Rise; Shoreline Change; Wetlands                                                                                                              | 5  | Journal of Coastal Conservation           | 10.1007/s11852-015-0403-y      |
| 839 | Anderson T; Fletcher C; Barbee M; Frazer L; Romine B | 2015 | Doubling of coastal erosion under rising sea level by midcentury in Hawaii                                                             | Erosion; Hawaii; Reef; Sea Level Rise; Shoreline                                                                                                                       | 46 | Natural Hazards                           | 10.1007/s11069-015-1698-6      |
| 840 | Doyle B; Adams M                                     | 2015 | Statistical evaluation of shoreline change a case study from Seabrook island South Carolina                                            | Accretion; Barrier Island; DSAS; Erosion; Geographic Information Systems; Linear Regression                                                                            | 3  | Environmental and Engineering Geoscience  | 10.2113/gsegeosci.21.3.165     |

|     |                                                           |      |                                                                                                                      |                                                                                                              |    |                                                |                                 |
|-----|-----------------------------------------------------------|------|----------------------------------------------------------------------------------------------------------------------|--------------------------------------------------------------------------------------------------------------|----|------------------------------------------------|---------------------------------|
| 841 | Misra A; Balaji R                                         | 2015 | Decadal changes in the land use land cover and shoreline along the coastal districts of southern Gujarat, India      | Band Ratios; Coastal Erosion; Hybrid Classification; LULC Changes; Shoreline Change; Southern Gujarat        | 18 | Environmental Monitoring and Assessment        | 10.1007/s10661-015-4684-2       |
| 842 | Feng Y; Liu Y; Liu D                                      | 2015 | Shoreline mapping with cellular automata and the shoreline progradation analysis in Shanghai China from 1979 to 2008 | Cellular Automata; Fractal; Remote Sensing; Shanghai; Shoreline Mapping; Shoreline Progradation              | 18 | Arabian Journal of Geosciences                 | 10.1007/s12517-014-1515-7       |
| 843 | Aquino D S A; Stattegger K; Schwarzer K; Vital H; Heise B | 2015 | The influence of climatic variations on river delta hydrodynamics and morphodynamics in the Parnaíba delta, Brazil   | Harmonic Analysis; Meteorology; Wave-Dominated Delta                                                         | 7  | Journal of Coastal Research                    | 10.2112/JCOASTRES-D-14-00078.1  |
| 844 | Louati M; Saïdi H; Zargouni F                             | 2015 | Shoreline change assessment using remote sensing and GIS techniques: a case study of the Mejerda delta coast Tunisia | Band Ratioing; Digital Shoreline Analysis System; Landsat Imagery; Medjerda Delta; Shoreline Change; Tunisia | 30 | Arabian Journal of Geosciences                 | 10.1007/s12517-014-1472-1       |
| 845 | Moussaid J; Fora A; Zourarah B; Maanan M; Maanan M        | 2015 | Using automatic computation to analyze the rate of shoreline change on the Kenitra coast Morocco                     | Coastline Change; Digital Shoreline Analysis System (DSAS); GIS; Kenitra Coast                               | 60 | Ocean Engineering                              | 10.1016/j.oceaneng.2015.04.044  |
| 846 | Jonah F                                                   | 2015 | Managing coastal erosion hotspots along the Elmina, Cape Coast and Moree area of Ghana                               | Coastal Erosion; Coastal Management; Ghana; Hotspots; Sand Mining                                            | 15 | Ocean and Coastal Management                   | 10.1016/j.ocecoaman.2015.02.007 |
| 847 | Natesan U; Vishnunath R; Kathiravan K                     | 2015 | Shoreline oscillation of Dhanushkodi Rameswaram, India                                                               | Accretion; Dhanushkodi; Erosion; India; Shoreline Change                                                     | 1  | Geocarto International                         | 10.1080/10106049.2014.937465    |
| 848 | Geleynse N; Hiatt M; Sangireddy H; Passalacqua P          | 2015 | Identifying environmental controls on the shoreline of a natural river delta                                         | Environmental Control; Inundation; River Delta; Satellite                                                    | 19 | Journal of Geophysical Research: Earth Surface | 10.1002/2014JF003408            |

Imagery; Shoreline;  
Wind

|     |                                                                           |      |                                                                                                                                                           |                                                                                                                                                            |    |                                                                                                                |                                        |
|-----|---------------------------------------------------------------------------|------|-----------------------------------------------------------------------------------------------------------------------------------------------------------|------------------------------------------------------------------------------------------------------------------------------------------------------------|----|----------------------------------------------------------------------------------------------------------------|----------------------------------------|
| 849 | Zhang W; Xu Y; Hoitink A; Sassi M; Zheng J; Chen X; Zhang C               | 2015 | Morphological change in the Pearl river delta China                                                                                                       | Coastline; Land Reclamation; Morphological Change; Pearl River Estuary; Sedimentation                                                                      | 56 | Marine Geology                                                                                                 | 10.1016/j.margeo.2015.02.012           |
| 850 | Sánchez-García E; Pardo-Pascual J; Balaguer-Beser A; Almonacid-Caballer J | 2015 | Analysis of the shoreline position extracted from Landsat TM and ETM imagery                                                                              | Coastal Environment; Landsat Imagery; Long-Term Trends; Monitoring Changes; Shoreline Position; Statistical Methods                                        | 13 | International Archives of The Photogrammetry, Remote Sensing and Spatial Information Sciences - ISPRS Archives | 10.5194/isprSARchives-XL-7-W3-991-2015 |
| 851 | El-Asmar H; Taha M; El-Kafrawy S; El-Sorogy A                             | 2015 | Control of late Holocene geoprocesses on the sustainable development plans of the Tineh plain NW Sinai coast Egypt                                        | Change Detection; Lu /Lc; Geomorphology; Deltaic Plain; Sedimentary Lithofacies; Shoreline Changes; Sinai Coast; Strand Plain; Tell El-Farama; Tineh Plain | 3  | Journal of Coastal Conservation                                                                                | 10.1007/s11852-015-0377-9              |
| 852 | Yao F; Parrish C; Pe'Eri S; Calder B; Rzhano Y                            | 2015 | Modeling uncertainty in photogrammetry-derived national shoreline                                                                                         | National Shoreline; Photogrammetric Stereo Compilation; Uncertainty                                                                                        | 8  | Marine Geodesy                                                                                                 | 10.1080/01490419.2014.957792           |
| 853 | Hickin A; Lian O; Levson V; Cui Y                                         | 2015 | Pattern and chronology of glacial lake peace shorelines and implications for isostasy and icesheet configuration in northeastern British Columbia, Canada | NA                                                                                                                                                         | 22 | Boreas                                                                                                         | 10.1111/bor.12110                      |

|     |                                                |      |                                                                                                                                          |                                                                                                                  |     |                                                                                     |                                 |
|-----|------------------------------------------------|------|------------------------------------------------------------------------------------------------------------------------------------------|------------------------------------------------------------------------------------------------------------------|-----|-------------------------------------------------------------------------------------|---------------------------------|
| 854 | Masria A; Nadaoka K; Negm A; Iskander M        | 2015 | Detection of shoreline and land cover changes around Rosetta Promontory Egypt based on remote sensing analysis                           | Change Detection; Land Cover; Remote Sensing; Rosetta; Shoreline                                                 | 34  | Land                                                                                | 10.3390/land4010216             |
| 855 | Pianca C; Holman R; Siegle E                   | 2015 | Shoreline variability from days to decades results of long-term video imaging                                                            | Interannual Variability; Shoreline Variability; Video Remote Sensing; Wave Forcing                               | 45  | Journal of Geophysical Research C: Oceans                                           | 10.1002/2014JC010329            |
| 856 | Suo A; Zhang M                                 | 2015 | Sea areas reclamation and coastline change monitoring by remote sensing in coastal zone of Liaoning in China                             | Change; Coastline; Liaoning;; Monitoring; Reclamation; Sea Areas                                                 | 18  | Journal of Coastal Research                                                         | 10.2112/SI73-124.1              |
| 857 | Ghosh M; Kumar L; Roy C                        | 2015 | Monitoring the coastline change of Hatiya island in Bangladesh using remote sensing techniques                                           | Accretion; Erosion; Integrated Technique; Landsat; MNDWI; On-Screen Digitizing                                   | 116 | ISPRS Journal of Photogrammetry and Remote Sensing                                  | 10.1016/j.isprsjprs.2014.12.009 |
| 858 | Høgaas F; Sveian H                             | 2015 | The younger dryas main line on Leka Norway as determined from a high resolution digital elevation model derived from airborne Lidar data | Airborne LIDAR Data; Cliff Degradation; Cold Climate Erosion; Main Line Development; Raised Shoreline Morphology | 5   | Geomorphology                                                                       | 10.1016/j.geomorph.2014.12.002  |
| 859 | Choung Y                                       | 2015 | Mapping 3D shorelines using KOMPSAT-2 imagery and airborne Lidar data                                                                    | Coastal Zones; Kompsat-2 Imagery; LIDAR; NDWI; Shorelines                                                        | 7   | Journal of The Korean Society of Surveying, Geodesy, Photogrammetry and Cartography | 10.7848/ksgpc.2015.33.1.23      |
| 860 | Prahalad V; Sharples C; Kirkpatrick J; Mount R | 2015 | Is wind-wave fetch exposure related to soft shoreline change in swell-sheltered situations with low terrestrial sediment input?          | Coastal Erosion; Fetch Wave Exposure; GIS; Saltmarsh; Soft Sediment; Tasmania                                    | 13  | Journal of Coastal Conservation                                                     | 10.1007/s11852-014-0352-x       |

|     |                                                             |      |                                                                                                                                                             |                                                                                                                                         |    |                                                                                                                                     |                                       |
|-----|-------------------------------------------------------------|------|-------------------------------------------------------------------------------------------------------------------------------------------------------------|-----------------------------------------------------------------------------------------------------------------------------------------|----|-------------------------------------------------------------------------------------------------------------------------------------|---------------------------------------|
| 861 | Castedo R; De L V R;<br>Fernández-Hernández M;<br>Paredes C | 2015 | Measurement of historical<br>cliff-top changes and estimation<br>of future trends using GIS data<br>between Bridlington and<br>Hornsea Holderness coast, UK | Clay Cliffs; Climate<br>Change; GIS;<br>Recession Modeling;<br>Shoreline Evolution                                                      | 13 | Geomorphology                                                                                                                       | 10.1016/j.geomorph.2014.11.013        |
| 862 | Manivanan R                                                 | 2015 | Advancement of technology for<br>detecting shoreline changes in<br>east coast of India and<br>comparison with prototype<br>behaviour                        | Littoral Drift;<br>Longshore Sediment<br>Transport;<br>Mathematical<br>Modelling Technique;<br>Shoreline Change;<br>Wave Climate        | 0  | Coastal Research<br>Library                                                                                                         | 10.1007/978-3-319-06305-8_13          |
| 863 | Uda T; Mimaki J; Onaka S;<br>San-Nami T                     | 2015 | Rapid accumulation of coral<br>debris to Atoll islets in Tuvalu<br>by storm waves and subsequent<br>deformation of Islets                                   | Aerial Photographs;<br>Atoll Islets; Coral<br>Reef; Funafuti;<br>Shoreline Change;<br>Tropical Cyclone;<br>Tuvalu                       | 1  | Chikei/Transaction<br>s, Japanese<br>Geomorphological<br>Union                                                                      | NA                                    |
| 864 | Agha T R; Jafari M; Fallah<br>M; Alavi A                    | 2015 | A study on variations of<br>shoreline changes and temporal-<br>spatial potentiality for cloud<br>seeding at Urumia lake                                     | Landsat Satellite;<br>Neural Network;<br>Shoreline Changes;<br>Temporal- Spatial<br>Potentiality<br>Evaluation; Urmia<br>Lake           | 0  | International<br>Archives of The<br>Photogrammetry,<br>Remote Sensing<br>and Spatial<br>Information<br>Sciences - ISPRS<br>Archives | 10.5194/isprSARchives-XL-1-W5-15-2015 |
| 865 | Tanaka H; Hoang V;<br>Mitobe Y                              | 2015 | Analytical model for concave<br>shoreline induced by the 2011<br>tsunami                                                                                    | Analytical Solution;<br>Concave Shape<br>Erosion; One-Line<br>Model; Sandy Coast<br>Breaching; Shoreline<br>Change; The 2011<br>Tsunami | 1  | Procedia<br>Engineering                                                                                                             | 10.1016/j.proeng.2015.11.223          |

|     |                                           |      |                                                                                                                                                     |                                                                                                        |   |                                                                                                                 |                           |
|-----|-------------------------------------------|------|-----------------------------------------------------------------------------------------------------------------------------------------------------|--------------------------------------------------------------------------------------------------------|---|-----------------------------------------------------------------------------------------------------------------|---------------------------|
| 866 | Anh N; Tuan H; Kien D                     | 2015 | Analysis of shoreline changes in the northern passage of Thuan an inlet Thua Thien hue province in period 2000-2014 by using GIS and remote sensing | Erosion; GIS; Remote Sensing; Shoreline; Shoreline                                                     | 0 | ACRS 2015 - 36th Asian Conference on Remote Sensing: Fostering Resilient Growth In Asia, Proceedings            | NA                        |
| 867 | Choung Y                                  | 2015 | Monitoring shoreline changes in east coasts of Korea using multitemporal Landsat imagery                                                            | Coastal Erosion; Landsat Imagery; NDWI; Shoreline                                                      | 0 | ACRS 2015 - 36th Asian Conference on Remote Sensing: Fostering Resilient Growth In Asia, Proceedings            | NA                        |
| 868 | Samanmali M; Piyadasa R; Wickramasinghe D | 2015 | Shoreline changes investigation during the last 50 years in Kalpitiya Peninsula Sri Lanka                                                           | NA                                                                                                     | 0 | Proceedings of Iamg 2015 - 17th Annual Conference of The International Association For Mathematical Geosciences | NA                        |
| 869 | Liu X; Gao Z; Ning J; Gao W               | 2015 | Study on coastline change in Shandong province based on geoinformation Tupu                                                                         | Coastline Change; Geo-Information Tupu; GIS; Temporal and Spatial Change                               | 0 | Proceedings of Spie - The International Society For Optical Engineering                                         | 10.1117/12.2186486        |
| 870 | Loinenak F; Hartoko A; Muskananfol M      | 2015 | Mapping of coastal vulnerability using the coastal vulnerability index and geographic information system                                            | Class Ranks; Coastal Vulnerability Index; Doreri Bay; Geographic Information Systems; Spatial Analysis | 9 | International Journal of Technology                                                                             | 10.14716/ijtech.v6i5.1361 |



|     |                                                                                                      |      |                                                                                                                                      |                                                                                     |    |                                                                                                                |                              |
|-----|------------------------------------------------------------------------------------------------------|------|--------------------------------------------------------------------------------------------------------------------------------------|-------------------------------------------------------------------------------------|----|----------------------------------------------------------------------------------------------------------------|------------------------------|
| 871 | Ranieri L; El-Robrini M                                                                              | 2015 | Evolution of the salinópolis shoreline northeastern of Pará Brazil evolução da linha de costa de salinópolis nordeste do Pará Brasil | Change of Shoreline; Multitemporal Analysis; Remote Sensing; Salinópolis            | 10 | Pesquisas Em Geociencias                                                                                       | 10.22456/1807-9806.78121     |
| 872 | Niculescu D; Vlasceanu E; Omer I; Mateescu R                                                         | 2015 | The monitoring of the Romanian littoral cliffs using automatic flight systems                                                        | Cliffs Erosion; Coastal Changes; Coastal Evolution Trend; UAV Survey                | 0  | International Multidisciplinary Scientific Geoconference Surveying Geology and Mining Ecology Management, Sgem | NA                           |
| 873 | Sesli F; Caniberk M                                                                                  | 2015 | Estimation of the coastline changes using Lidar                                                                                      | Coastal Changes; Coastal Management; Coastal Zone; Coastline; LIDAR; Remote Sensing | 3  | Acta Montanistica Slovaca                                                                                      | NA                           |
| 874 | Ismail S; Zulkifley M; Hussain A; Mustafa M                                                          | 2015 | A review on shoreline detection based on satellite imagery                                                                           | Active Contour; Pixel Swapping Algorithm; Satellite Imagery; Shoreline Detection    | 1  | ARPJ Journal of Engineering and Applied Sciences                                                               | NA                           |
| 875 | Shin B; Kim K                                                                                        | 2015 | Estimation of shoreline change using high resolution images                                                                          | GCP; Image Processing; Long-Term Monitoring; Shoreline Change                       | 7  | Procedia Engineering                                                                                           | 10.1016/j.proeng.2015.08.391 |
| 876 | Misra A; Balaji R                                                                                    | 2015 | A study on the shoreline changes and land use/land cover along the south Gujarat coastline                                           | Band Ratios; Coastal Erosion; LULC; Shoreline Change; South Gujarat                 | 47 | Procedia Engineering                                                                                           | 10.1016/j.proeng.2015.08.311 |
| 877 | Velegrakis A; Trygonis V; Voudoukas M; Ghionis G; Chatzipavlis A; Andreadis O; PSARros F; Hasiotis T | 2015 | Automated 2D shoreline detection from coastal video imagery an example from the island of Crete                                      | Beach Morphodynamics; Coastal Video Imagery; Shoreline Variability                  | 2  | Proceedings of Spie - The International Society For Optical Engineering                                        | 10.1117/12.2192687           |

|     |                                                                                                                           |      |                                                                                                                                                                                      |                                                                                                                      |    |                                                                       |                              |
|-----|---------------------------------------------------------------------------------------------------------------------------|------|--------------------------------------------------------------------------------------------------------------------------------------------------------------------------------------|----------------------------------------------------------------------------------------------------------------------|----|-----------------------------------------------------------------------|------------------------------|
| 878 | Rajawat A; Chauhan H; Ratheesh R; Rode S; Bhanderi R; Mahapatra M; Kumar M; Yadav R; Abraham S; Singh S; Keshri K; Ajai A | 2015 | Assessment of coastal erosion along the Indian coast on 1: 25,000 scale using satellite data of 1989-1991 and 2004 -2006 time frames                                                 | Accretion; Coastal Erosion; High and Low Tide Lines; Satellite Data; Shoreline Changes                               | 22 | Current Science                                                       | NA                           |
| 879 | Kolega N                                                                                                                  | 2015 | Coastline changes on the Slovenian coast between 1954 and 2010 Spreminjanje Obalne rte na slovenski obali med letoma 1954 in 2010                                                    | Aerial Photography; Coastline; Digital Shoreline Analysis System; Geography; Slovenian Coast                         | 2  | Acta Geographica Slovenica                                            | 10.3986/AGS.1887             |
| 880 | Ali T; Atabay S; Mortula M; Ma R                                                                                          | 2015 | Semiautomatic extraction of the shoreline from high-resolution satellite imagery and coastal terrain model                                                                           | High-Resolution Imagery; Shoreline Extraction; Shoreline Mapping                                                     | 1  | Surveying and Land Information Science                                | NA                           |
| 881 | Petropoulos G; Kalivas D; Griffiths H; Dimou P                                                                            | 2015 | Remote sensing and GIS analysis for mapping spatio-temporal changes of erosion and deposition of two Mediterranean river deltas: The case of the Axios and Aliakmonas rivers, Greece | Coastline Mapping; GIS; Landsat Tm; Photo-Interpretation; Remote Sensing; Support Vector Machines                    | 45 | International Journal of Applied Earth Observation and Geoinformation | 10.1016/j.jag.2014.08.004    |
| 882 | García-Rubio G; Huntley D; Russell P                                                                                      | 2015 | Evaluating shoreline identification using optical satellite images                                                                                                                   | Coastal Dynamics; Coastal Monitoring; Remote Sensing; Shoreline                                                      | 58 | Marine Geology                                                        | 10.1016/j.margeo.2014.11.002 |
| 883 | Amaro V; Gomes L; De L F; Scudelari A; Neves C; Busman D; Santos A                                                        | 2015 | Multitemporal analysis of coastal erosion based on multisource satellite images Ponta Negra beach Natal city, northeastern Brazil                                                    | Digital Elevation Model; PPK-GPS; Remote Sensing; Shoreline Detection                                                | 22 | Marine Geodesy                                                        | 10.1080/01490419.2014.904257 |
| 884 | Ali P; Narayana A                                                                                                         | 2015 | Short-term morphological and shoreline changes at Trinkat island Andaman and Nicobar India after the 2004 tsunami                                                                    | 2004 Tsunami; Andaman and Nicobar; Beach Recovery; Coastal Landforms; December 26; Shoreline Erosion; Trinkat Island | 22 | Marine Geodesy                                                        | 10.1080/01490419.2014.908795 |

|      |                                                                        |      |                                                                                                                                             |                                                                                                                     |    |                                               |                                |
|------|------------------------------------------------------------------------|------|---------------------------------------------------------------------------------------------------------------------------------------------|---------------------------------------------------------------------------------------------------------------------|----|-----------------------------------------------|--------------------------------|
| 885  | Ghoneim E; Mashaly J;<br>Gamble D; Halls J;<br>Abubakr M               | 2015 | Nile delta exhibited a spatial reversal in the rates of shoreline retreat on the Rosetta Promontory comparing pre and post-beach protection | GIS; Image Classification; Landsat; Remote Sensing; Shoreline Changing Rate; Very High-Resolution Image             | 38 | Geomorphology                                 | 10.1016/j.geomorph.2014.08.021 |
| 886  | Bulteau T; Baills A;<br>Petitjean L; Garcin M;<br>Palanisamy H; Le C G | 2015 | Gaining insight into regional coastal changes on la réunion island through a Bayesian data mining approach                                  | Bayesian Networks; Coastal Databases; La Réunion Island; Sea-Level Rise; Shoreline Changes; Vertical Ground Motions | 9  | Geomorphology                                 | 10.1016/j.geomorph.2014.09.002 |
| 887  | Kaliraj S; Chandrasekar N;<br>Magesh N                                 | 2015 | Evaluation of coastal erosion and accretion processes along the southwest coast of Kanyakumari, Tamil Nadu using geospatial techniques      | Coastal Erosion and Accretion; Erosion Factors; Remote Sensing and GIS; Southwest Coast; Tamil Nadu                 | 35 | Arabian Journal of Geosciences                | 10.1007/s12517-013-1216-7      |
| 1895 | Sutikno S; Murakami K;<br>Handoyo D; Fauzi M                           | 2015 | Calibration of numerical model for shoreline change prediction using satellite imagery data                                                 | DSAS; Numerical Model; Shoreline Change                                                                             | 2  | Makara Journal of Technology                  | 10.7454/mst.v19i3.3042         |
| 1896 | Lubis A                                                                | 2015 | Uplift of shoreline regions on pagai island due to the September 12, 2007 MW 84 earthquake captured by SAR image                            | Displacement; Earthquake; In Situ Observation; SAR                                                                  | 0  | Makara Journal of Technology                  | 10.7454/mst.v19i3.3044         |
| 1901 | Crapoulet A; Hequette A;<br>Levoy F; Bretel P                          | 2015 | Assessment of shoreline change and coastal sediment budget in the Bay of Wissant northern France using airborne Lidar                       | Shoreline Evolution; Coastal Sediment Budget; Topographic LIDAR; Coastal Dunes; Bay of Wissant                      | 5  | Geomorphologie-Relief Processus Environnement | 10.4000/geomorphologie.11146   |
| 1904 | Olusegun A; Qiao L; Ding D; Li G; Ma Y; Wang L                         | 2015 | Evolutionary trends of the Niger delta shoreline during the last 100 years responses to rainfall and river discharge                        | Coastline Change; Climate Change; River Discharge; Niger Delta; Niger River                                         | 15 | Marine Geology                                | 10.1016/j.margeo.2015.06.007   |

|      |                                                                           |      |                                                                                                                   |                                                                                                                     |   |                                                               |                                        |
|------|---------------------------------------------------------------------------|------|-------------------------------------------------------------------------------------------------------------------|---------------------------------------------------------------------------------------------------------------------|---|---------------------------------------------------------------|----------------------------------------|
| 1909 | Da S A; Stattegger K; Schwarzer K; Vital H; Heise B                       | 2015 | The influence of climatic variations on river delta hydrodynamics and morphodynamics in the Parnaiba delta Brazil | Wave-Dominated Delta; Meteorology; Harmonic Analysis                                                                | 6 | Journal of Coastal Research                                   | 10.2112/JCOASTRES-D-14-00078.1         |
| 1914 | Baby S                                                                    | 2015 | Monitoring of Kuwait coastline for spatial and temporal changes from spaceborne Landsat sensors                   | Remote Sensing Sensor; Image Processing; Erosion and Accretion; Digitization; Shoreline Change                      | 1 | Indian Journal of Geo-Marine Sciences                         | NA                                     |
| 1922 | Liu J; Cheng J; Jiang F                                                   | 2015 | Methodological study of coastal geological hazard assessment based on GIS                                         | Costal Zone; Geological Hazard; GIS; Seawater Intrusion; Coastline Change; Sea-Level Rise                           | 0 | Journal of Groundwater Science and Engineering                | NA                                     |
| 1925 | Yun M; Choi C                                                             | 2015 | Spatial analysis of shoreline change in northwest coast of Taean Peninsula                                        | Kompsat-2; NDVI; Aerial LIDAR; Shoreline; DSAS                                                                      | 1 | Korean Journal of Remote Sensing                              | 10.7780/kjrs.2015.31.1.4               |
| 1927 | Sanchez-Garcia E; Pardo-Pascual E; Balaguer-Beser A; Almonacid-Caballer J | 2015 | Analysis of the shoreline position extracted from Landsat TM and ETM plus imagery                                 | Shoreline Position; Landsat Imagery; Statistical Methods; Coastal Environment; Monitoring Changes; Long-Term Trends | 9 | 36th International Symposium on Remote Sensing of Environment | 10.5194/isprSARchives-XL-7-W3-991-2015 |
| 1934 | Kolega N                                                                  | 2015 | Coastline changes on the Slovenian coast between 1954 and 2010                                                    | Geography; Coastline; Slovenian Coast; Aerial Photography; Digital Shoreline Analysis System                        | 2 | Acta Geographica Slovenica-Geografski Zbornik                 | NA                                     |
| 1935 | Oliveira L; Souza R                                                       | 2015 | Estuarine morphodynamics and variations of the Ebb tidal delta in the Vazabarris river SE Brazil                  | Sandy BaRS; Bypassing Sediment; Coastal Sedimentation Processes                                                     | 1 | Revista Brasileira De Geomorfologia                           | NA                                     |

|      |                                                            |      |                                                                                                                      |                                                                                                   |    |                                                                                          |                             |
|------|------------------------------------------------------------|------|----------------------------------------------------------------------------------------------------------------------|---------------------------------------------------------------------------------------------------|----|------------------------------------------------------------------------------------------|-----------------------------|
| 1938 | Hegde A; Akshaya B                                         | 2015 | Shoreline transformation study of Karnataka coast geospatial approach                                                | Shoreline Change; Karnataka Coast; DSAS; Landsat                                                  | 16 | International Conference on Water Resources, Coastal and Ocean Engineering (ICWRCOE'15)  | 10.1016/j.aqpro.2015.02.021 |
| 1939 | Shetty A; Jayappa K; Mitra D                               | 2015 | Shoreline change analysis of Mangalore coast and morphometric analysis of Netravathigurupur and Mulkypavanje spits   | Remote Sensing; GIS; Shoreline Changes; Seawalls; BreakwaterRS                                    | 11 | International Conference on Water Resources, Coastal and Ocean Engineering (ICWRCOE'15)  | 10.1016/j.aqpro.2015.02.025 |
| 1940 | Salghuna N; Bharathvaj S                                   | 2015 | Shoreline change analysis for northern part of the Coromandel coast                                                  | Shoreline Change; Remote Sensing; GIS; DSAS                                                       | 11 | International Conference on Water Resources, Coastal and Ocean Engineering (ICWRCCOE'15) | 10.1016/j.aqpro.2015.02.043 |
| 1941 | Sankari T; Chandramouli A; Gokul K; Surya S; SARavanavel J | 2015 | Coastal vulnerability mapping using geospatial technologies in Cuddalore-Pichavaram coastal tract, Tamil Nadu, India | Cuddalore-Pichavaram Coast; USGS Classification; Remote Sensing; GIS Tools; Coastal Vulnerability | 15 | International Conference on Water Resources, Coastal and Ocean Engineering (ICWRCOE'15)  | 10.1016/j.aqpro.2015.02.055 |

|      |                                                |      |                                                                                                                                                            |                                                                                                    |    |                                                                                         |                             |
|------|------------------------------------------------|------|------------------------------------------------------------------------------------------------------------------------------------------------------------|----------------------------------------------------------------------------------------------------|----|-----------------------------------------------------------------------------------------|-----------------------------|
| 1942 | Parvathy K; Noujas V;<br>Thomas K; Ramesh H    | 2015 | Impact of mudbanks on coastal dynamics                                                                                                                     | Mudbanks; Coastal Dynamics; Shoreline Change; Alleppy Coast                                        | 4  | International Conference on Water Resources, Coastal and Ocean Engineering (ICWRCOE'15) | 10.1016/j.aqpro.2015.02.196 |
| 1945 | Aedla R; Dwarakish G;<br>Reddy D               | 2015 | Automatic shoreline detection and change detection analysis of netravatigurpurrivermouth using histogram equalization and adaptive thresholding techniques | Histogram Equalization; Thresholding; Shoreline; Remote Sensing; Digital Shoreline Analysis System | 57 | International Conference on Water Resources, Coastal and Ocean Engineering (ICWRCOE'15) | 10.1016/j.aqpro.2015.02.073 |
| 736  | Rajasree B; Deo M; Sheela N L                  | 2016 | Effect of climate change on shoreline shifts at a straight and continuous coast                                                                            | Climate Change; Neural Network; Sediment Transport; Shoreline Changes                              | 23 | Estuarine, Coastal and Shelf Science                                                    | 10.1016/j.ecss.2016.10.034  |
| 737  | Immanuvel D T; Mukesh M; Kumaravel S; Sabeen H | 2016 | Long and short-term variations in shore morphology of van island in Gulf of Mannar using remote sensing images and DSAS analysis                           | End Point Rate; High Erosion; Long-Term Changes; Shoreline Changes; Short-Term Changes             | 8  | Arabian Journal of Geosciences                                                          | 10.1007/s12517-016-2772-4   |
| 738  | Puig M; Del R L;<br>Plomaritis T; Benavente J  | 2016 | Contribution of storms to shoreline changes in mesotidal dissipative beaches: case study in the Gulf of Cádiz SW Spain                                     | NA                                                                                                 | 7  | Natural Hazards and Earth System Sciences                                               | 10.5194/nhess-16-2543-2016  |
| 739  | Jayakumar K;<br>Malarvannan S                  | 2016 | Assessment of shoreline changes over the northern Tamil Nadu coast south India using webGIS techniques                                                     | Coastal Zone; Overlay Analysis; Shoreline Change; Spatial Datasets; Temporal Analysis; WebGIS      | 14 | Journal of Coastal Conservation                                                         | 10.1007/s11852-016-0461-9   |

|     |                                                                                               |      |                                                                                                                                                      |                                                                                      |    |                                                                |                                  |
|-----|-----------------------------------------------------------------------------------------------|------|------------------------------------------------------------------------------------------------------------------------------------------------------|--------------------------------------------------------------------------------------|----|----------------------------------------------------------------|----------------------------------|
| 740 | El-Asmar H; Taha M; El-Sorogy A                                                               | 2016 | Morphodynamic changes as an impact of human intervention at the Ras Elbar Damietta harbor coast NW Damietta Promontory Nile delta, Egypt             | Beach; Damietta Harbor; Dynamic; Geomorphology; Human Impact; Nile Delta; Ras El-Bar | 8  | Journal of African Earth Sciences                              | 10.1016/j.jafrearsci.2016.09.035 |
| 741 | Durán R; Guillén J; Ruiz A; Jiménez J; Sagristà E                                             | 2016 | Morphological changes beach inundation and overwash caused by an extreme storm on a lowlying embayed beach bounded by a dune system NW Mediterranean | LIDAR; Sediment Budget; Shoreline Erosion and Accretion; Vulnerability               | 15 | Geomorphology                                                  | 10.1016/j.geomorph.2016.09.012   |
| 742 | Ding X; Zou X; Yu T                                                                           | 2016 | Coastline detection in SAR images using discriminant cuts segmentation                                                                               | NA                                                                                   | 1  | IOP Conference Series: Earth and Environmental Science         | 10.1088/1755-1315/46/1/012035    |
| 743 | Guo Q; Pu R; Zhang B; Gao L                                                                   | 2016 | A comparative study of coastline changes at Tampa Bay and Xiangshan harbor during the last 30 years                                                  | Change Detection; Coastline Extraction; Landsat Imagery; Long-Term Monitoring        | 11 | International Geoscience and Remote Sensing Symposium (IGARSS) | 10.1109/IGARSS.2016.7730351      |
| 744 | Suursaar U; Tõnisson H; Kont A                                                                | 2016 | Assessing storm-related geomorphic shoreline changes based on GPS surveys old maps and aerial photographs                                            | Baltic Sea; Coastal Erosion; GIS; GPS; Shoreline Changes; Storm Vulnerability; Waves | 0  | International Geoscience and Remote Sensing Symposium (IGARSS) | 10.1109/IGARSS.2016.7730402      |
| 745 | Sreenivasulu G; Jayaraju N; Sundara R B; Lakshmi P T; Lakshmana B; Nagalakshmi K; Prashanth M | 2016 | River mouth dynamics of Swarnamukhi estuary Nellore coast southeast coast of India                                                                   | Erosion and Accretion; River Mouth Dynamics; Swarnamukhi Estuary                     | 4  | Geodesy and Geodynamics                                        | 10.1016/j.geog.2016.09.003       |
| 746 | Cellone F; Carol E; Tosi L                                                                    | 2016 | Coastal erosion and loss of wetlands in the middle Río de la Plata estuary, Argentina                                                                | Coastal Wetlands; DSAS; Erosion; Rates of Shoreline Change                           | 32 | Applied Geography                                              | 10.1016/j.apgeog.2016.09.014     |

|     |                                                                                              |      |                                                                                                                                                     |                                                                                                                                |    |                                                                 |                                     |
|-----|----------------------------------------------------------------------------------------------|------|-----------------------------------------------------------------------------------------------------------------------------------------------------|--------------------------------------------------------------------------------------------------------------------------------|----|-----------------------------------------------------------------|-------------------------------------|
| 747 | Kermani S; Boutiba M;<br>Guendouz M; Guettouche<br>M; Khelfani D                             | 2016 | Detection and analysis of<br>shoreline changes using<br>geospatial tools and automatic<br>computation: case of Jijelian<br>sandy coast east Algeria | Corrected Aerial<br>Photographs; EPR &<br>LRR; GIS; Satellite<br>Image (Quickbird);<br>Shoreline Changes<br>Accretion/Erosion  | 54 | Ocean and Coastal<br>Management                                 | 10.1016/j.ocecoaman.2016.08.<br>010 |
| 748 | Temiz F; Durduran S                                                                          | 2016 | Monitoring coastline change<br>using remote sensing and GIS<br>technology: A case study of<br>Acigöl lake, Turkey                                   | NA                                                                                                                             | 6  | IOP Conference<br>Series: Earth and<br>Environmental<br>Science | 10.1088/1755-<br>1315/44/4/042033   |
| 749 | Michalowska K;<br>Glowienka E;<br>Hejmanowska B                                              | 2016 | Temporal satellite images in the<br>process of automatic efficient<br>detection of changes of the Baltic<br>sea coastal zone                        | NA                                                                                                                             | 4  | IOP Conference<br>Series: Earth and<br>Environmental<br>Science | 10.1088/1755-<br>1315/44/4/042019   |
| 750 | Shi P; Wang F; Shang Z;<br>Kang H; Xiao G; Yang J; Li<br>J; Jiang X; Chen Y; Tian L;<br>Li Y | 2016 | The present situation and<br>changing characteristics of the<br>shorelines along Tianjinhebei<br>coastal areas and proposal for<br>protection       | Artificial Shoreline;<br>Natural Shoreline;<br>Remote Sensing;<br>Semi-Developed<br>Shoreline; Tianjin-<br>Hebei Coastal Areas | 1  | Geological Bulletin<br>of China                                 | NA                                  |
| 751 | Anfuso G; Bowman D;<br>Danese C; Pranzini E                                                  | 2016 | Transect based analysis versus<br>area based analysis to quantify<br>shoreline displacement spatial<br>resolution issues                            | Beach Erosion;<br>Beach Survey; Shore<br>Protection; Shoreline<br>Evolution                                                    | 17 | Environmental<br>Monitoring and<br>Assessment                   | 10.1007/s10661-016-5571-1           |
| 752 | Samanta S; Paul S                                                                            | 2016 | Geospatial analysis of shoreline<br>and land use land cover changes<br>through remote sensing and GIS<br>techniques                                 | Coastal Processes;<br>Geographical<br>Information System;<br>Land Use/Land<br>Cover; Remote<br>Sensing; Shoreline<br>Change    | 6  | Modeling Earth<br>Systems and<br>Environment                    | 10.1007/s40808-016-0180-0           |
| 753 | Roy S; Mahmood R                                                                             | 2016 | Monitoring shoreline dynamics<br>using Landsat and hydrological<br>data: A case study of Sandwip<br>island of Bangladesh                            | NA                                                                                                                             | 9  | Pennsylvania<br>Geographer                                      | NA                                  |



|     |                                                                                 |      |                                                                                                                                                              |                                                                                                                               |    |                                                                                                           |                            |
|-----|---------------------------------------------------------------------------------|------|--------------------------------------------------------------------------------------------------------------------------------------------------------------|-------------------------------------------------------------------------------------------------------------------------------|----|-----------------------------------------------------------------------------------------------------------|----------------------------|
| 754 | Hou X; Wu T; Hou W;<br>Chen Q; Wang Y; Yu L                                     | 2016 | Characteristics of coastline changes in mainland China since the early 1940s                                                                                 | Bay Area; China; Coastline Change Rate; Coastline Fractal Dimension; Coastline Structure; Land-Sea Change; Mainland Coastline | 64 | Science China Earth Sciences                                                                              | 10.1007/s11430-016-5317-5  |
| 755 | Jonah F; Boateng I; Osman A; Shimba M; Mensah E; Adu-Boahen K; Chuku E; Effah E | 2016 | Shoreline change analysis using end point rate and net shoreline movement statistics an application to Elmina, Cape Coast and Moree section of Ghana's coast | Beach Sand Mining; Coastal Erosion Management; Ghana; GIS; Shoreline Change Monitoring                                        | 22 | Regional Studies In Marine Science                                                                        | 10.1016/j.rsma.2016.05.003 |
| 756 | Yingbiao C; Wu Z; Qinglan Q; Zihao Z; Han F                                     | 2016 | Dynamic monitoring and spatiotemporal evolution of the coastline in Pearl river estuary in recent fifty years                                                | Object-Oriented; Shoreline Change; Spatiotemporal Evolution; The Pearl River Estuary                                          | 3  | 4th International Workshop on Earth Observation and Remote Sensing Applications, Eorsa 2016 - Proceedings | 10.1109/EORSA.2016.7552772 |
| 757 | Wen S; Fengshou Z; Xiang W; Zizhu W; Fei L; Fei W; Xinxin W; Xu X               | 2016 | Hazard degree assessment of coastal erosion at Tianlongsi adjacent sandy coast                                                                               | Coastal Erosion; Erosion Rate; Hazard Degree Assessment; Sandy Coast                                                          | 1  | 4th International Workshop on Earth Observation and Remote Sensing Applications, Eorsa 2016 - Proceedings | 10.1109/EORSA.2016.7552843 |
| 758 | Chenthamil S; Kankara R; Markose V; Rajan B; Prabhu K                           | 2016 | Shoreline change and impacts of coastal protection structures on Puducherry SE coast of India                                                                | Accretion; DSAS; Erosion; GIS; Weighted Linear Regression                                                                     | 15 | Natural Hazards                                                                                           | 10.1007/s11069-016-2332-y  |

|     |                                                                                        |      |                                                                                                                                                   |                                                                                                   |     |                                                          |                                 |
|-----|----------------------------------------------------------------------------------------|------|---------------------------------------------------------------------------------------------------------------------------------------------------|---------------------------------------------------------------------------------------------------|-----|----------------------------------------------------------|---------------------------------|
| 759 | Rosli M; Ahmad M; Kaamin M; Izhar M                                                    | 2016 | Shoreline delineation and land reclamation change detection using Landsat image                                                                   | Erosion; Land Reclamation; Land Use; Shoreline Changes                                            | 0   | IOP Conference Series: Materials Science and Engineering | 10.1088/1757-899X/136/1/012040  |
| 760 | Da S G; Muler M; Prado M; Short A; Da F K A; Toldo J                                   | 2016 | Shoreline change analysis and insight into the sediment transport path along santa catarina island north shore Brazil                             | Beach Rotation; Headland Bypassing; Historical Trends; Pocket Beaches; Shoreline Evolution; Spits | 21  | Journal of Coastal Research                              | 10.2112/JCOASTRES-D-15-00164.1  |
| 761 | Ashraful I M; Mitra D; Dewan A; Akhter S                                               | 2016 | Coastal multi-hazard vulnerability assessment along the Ganges deltaic coast of Bangladesh: A geospatial approach                                 | Climatic Change; CVI; Ganges Deltaic Coast; Geospatial Techniques; Shoreline                      | 109 | Ocean and Coastal Management                             | 10.1016/j.ocecoaman.2016.03.012 |
| 762 | Jangir B; Satyanarayana A; Swati S; Jayaram C; Chowdary V; Dadhwal V                   | 2016 | Delineation of spatiotemporal changes of shoreline and geomorphological features of Odisha coast of India using remote sensing and GIS techniques | Geomorphology; Land Cover; Remote Sensing; Shoreline; Tropical Cyclone                            | 21  | Natural Hazards                                          | 10.1007/s11069-016-2252-x       |
| 763 | Radosavljevic B; Lantuit H; Pollard W; Overduin P; Couture N; Sachs T; Helm V; Fritz M | 2016 | Erosion and flooding threats to coastal infrastructure in the Arctic: A case study from Herschel island Yukon territory, Canada                   | Arctic; Coastal Erosion; Permafrost Coasts; UNESCO; Vulnerability Mapping                         | 52  | Estuaries and Coasts                                     | 10.1007/s12237-015-0046-0       |
| 764 | Li W; Gong P                                                                           | 2016 | Continuous monitoring of coastline dynamics in western Florida with a 30year time series of Landsat imagery                                       | Coastline Dynamics; Satellite Imagery; Trend Analysis                                             | 99  | Remote Sensing of Environment                            | 10.1016/j.rse.2016.03.031       |
| 765 | Ghosh A; Mukhopadhyay S                                                                | 2016 | Quantitative study on shoreline changes and erosion hazard assessment: case study in Murigangasaptamukhi interfluvial Sundarban India             | Deposition; Erosion; Erosion Hazard Assessment; Estuary; Shoreline Changes; Sundarban             | 15  | Modeling Earth Systems and Environment                   | 10.1007/s40808-016-0130-x       |

|     |                                                               |      |                                                                                                                                       |                                                                                                                     |     |                                           |                                |
|-----|---------------------------------------------------------------|------|---------------------------------------------------------------------------------------------------------------------------------------|---------------------------------------------------------------------------------------------------------------------|-----|-------------------------------------------|--------------------------------|
| 766 | Jana A; Maiti S; Biswas A                                     | 2016 | Analysis of short-term shoreline oscillations along Midnapurbalasore coast Bay of Bengal India a study based on geospatial technology | Landsat Etm+; Littoral Cell; Midnapur-Balasore Coast; Remote Sensing; Shoreline Change Rate; Shoreline Oscillations | 12  | Modeling Earth Systems and Environment    | 10.1007/s40808-016-0117-7      |
| 767 | Thomas T; Williams A; Rangel-Buitrago N; Phillips M; Anfuso G | 2016 | Assessing embayed equilibrium state beach rotation and environmental forcing influences Tenby southwest Wales, UK                     | Beach Rotation; Equilibrium Assessments Environmental Forcing Influences; GIS Platform; Morphological Change        | 8   | Journal of Marine Science and Engineering | 10.3390/jmse4020030            |
| 768 | Anastasiou S; Sylaios G                                       | 2016 | Assessment of shoreline changes and evaluation of coastal protection methods to mitigate erosion                                      | Coastline Change; Erosion; LITPACK; Morphodynamic Modeling; Protection Structures; Satellite Image Analysis         | 6   | Coastal Engineering Journal               | 10.1142/S0578563416500066      |
| 769 | Xu N; Gong P                                                  | 2016 | The impact of hurricane Katrina on the coastline west of New Orleans USA                                                              | Change Detection; Coastline; Hurricane Katrina; Natural Hazard; Remote Sensing                                      | 2   | Kexue tongbao/Chinese Science Bulletin    | 10.1360/N972015-01063          |
| 770 | Purkis S; Gardiner R; Johnston M; Sheppard C                  | 2016 | A half-century of coastline change in Diego Garcia the largest Atoll island in the Chagos                                             | Atoll Island; Chagos; Indian Ocean; Morphological Adjustment; Sea-Level Rise                                        | 37  | Geomorphology                             | 10.1016/j.geomorph.2016.03.010 |
| 771 | Albert S; Leon J; Grinham A; Church J; Gibbes B; Woodroffe C  | 2016 | Interactions between sea-level rise and wave exposure on reef island dynamics in the Solomon Islands                                  | Coastal Erosion; Pacific Islands; Sea-Level Rise                                                                    | 131 | Environmental Research Letters            | 10.1088/1748-9326/11/5/054011  |
| 772 | Markose V; Rajan B; Kankara R; Chenthamil S; Dhanalakshmi S   | 2016 | Quantitative analysis of temporal variations on shoreline change pattern along Ganjam district Odisha east coast of India             | Cyclone; DSAS; Erosion; Rushikulya River; Weighted Linear Regression                                                | 11  | Environmental Earth Sciences              | 10.1007/s12665-016-5723-1      |

|     |                                                                                                                                                     |      |                                                                                                                                                    |                                                                                                                         |    |                              |                                |
|-----|-----------------------------------------------------------------------------------------------------------------------------------------------------|------|----------------------------------------------------------------------------------------------------------------------------------------------------|-------------------------------------------------------------------------------------------------------------------------|----|------------------------------|--------------------------------|
| 773 | Bracs M; Turner I; Splinter K; Short A; Lane C; Davidson M; Goodwin I; Pritchard T; Cameron D                                                       | 2016 | Evaluation of opportunistic shoreline monitoring capability utilizing existing surfcam infrastructure                                              | Beach Monitoring; Coastal Imaging; Coastal Management                                                                   | 21 | Journal of Coastal Research  | 10.2112/JCOASTRES-D-14-00090.1 |
| 774 | Mann T; Bayliss-Smith T; Westphal H                                                                                                                 | 2016 | A geomorphic interpretation of shoreline change rates on reef islands                                                                              | Atolls; Coral Islands; Geomorphic Equilibria; Pacific Ocean; Sea-Level Rise; Shoreline Evolution                        | 19 | Journal of Coastal Research  | 10.2112/JCOASTRES-D-15-00093.1 |
| 775 | Xu N; Gao Z; Ning J                                                                                                                                 | 2016 | Analysis of the characteristics and causes of coastline variation in the Bohai Rim 1980-2010                                                       | DSAS; GIS; RS; Spatial and Temporal Variation                                                                           | 17 | Environmental Earth Sciences | 10.1007/s12665-016-5452-5      |
| 776 | Soedarti T; Rinanda O; Soegianto A                                                                                                                  | 2016 | Monitoring of coastline change using remote sensing data at south Pamekasan                                                                        | Change; Coastline; Remote Sensing; South Pamekasan                                                                      | 0  | AIP Conference Proceedings   | 10.1063/1.4943321              |
| 777 | Mann T; Westphal H                                                                                                                                  | 2016 | Multidecadal shoreline changes on Takú Atoll Papua New Guinea observational evidence of early reef island recovery after the impact of storm waves | High-Magnitude Event; Reef Island Dynamics; Sea-Level Rise; Shoreline Fluctuation                                       | 15 | Geomorphology                | 10.1016/j.geomorph.2015.12.028 |
| 778 | Jonah F; Mensah E; Edziyie R; Agbo N; Adjei-Boateng D                                                                                               | 2016 | Coastal erosion in Ghana: Causes, policies, and management                                                                                         | Climate Change; Coastal Erosion; Coastal Management; Shoreline Change                                                   | 12 | Coastal Management           | 10.1080/08920753.2016.1135273  |
| 779 | Ondoa G; Almar R; Kestenare E; Bahini A; Houngue G; Jouanno J; Du P Y; Castelle B; Melet A; Meyssignac B; Anthony E; Laibi R; Alory G; Ranasinghe R | 2016 | Potential of video cameras in assessing event and seasonal coastline behaviour Grand Popo Benin, Gulf of Guinea                                    | Bight of Benin; Longshore Sediment Transport; Regional Climate; Sea Level; Shoreline; Tide; Video Remote Sensing; Waves | 18 | Journal of Coastal Research  | 10.2112/SI75-089.1             |
| 780 | Mulcahy N; Kennedy D; Blanchon P                                                                                                                    | 2016 | Hurricane-induced shoreline change and post-storm recovery northeastern Yucatan Peninsula, Mexico                                                  | Barrier Beaches; Hurricanes; Shoreline Change                                                                           | 4  | Journal of Coastal Research  | 10.2112/SI75-239.1             |
| 781 | Choi K; Kim J; Lee J                                                                                                                                | 2016 | Migration of coastal erosional hotspots due to coastal protection structures                                                                       | Beach Erosion; BreakwaterRS; Coastal Disaster; Shoreline Change                                                         | 5  | Journal of Coastal Research  | 10.2112/SI75-213.1             |

|     |                                                                          |      |                                                                                                                                                           |                                                                                                                        |    |                                                    |                           |
|-----|--------------------------------------------------------------------------|------|-----------------------------------------------------------------------------------------------------------------------------------------------------------|------------------------------------------------------------------------------------------------------------------------|----|----------------------------------------------------|---------------------------|
| 782 | Haghshenas S; Arab A; Bakhtiari A; Attari M; Risk M                      | 2016 | Decadal evolution of Mond river delta the Persian Gulf                                                                                                    | Mond River Delta; Morphological Change; Satellite Imagery Analysis                                                     | 2  | Journal of Coastal Research                        | 10.2112/SI75-162.1        |
| 783 | Jeong S; Khim B; Jo Y; Kim B; Lee S; Park K                              | 2016 | Shoreline change rate of the barrier islands in Nakdong river estuary over the southern part of Korea                                                     | Barrier Islands; Nakdong River Estuary; Shoreline Change                                                               | 1  | Journal of Coastal Research                        | 10.2112/SI75-050.1        |
| 784 | Kinsela M; Morris B; Daley M; Hanslow D                                  | 2016 | A flexible approach to forecasting coastline change on wave dominated beaches                                                                             | Coastal Hazards; Probabilistic Modelling; Sediment Budget; Southeast Australia                                         | 12 | Journal of Coastal Research                        | 10.2112/SI75-191.1        |
| 785 | Angnuureng D; Almar R; Addo K; Castelle B; Senechal N; Laryea S; Wiafe G | 2016 | Video observation of waves and shoreline change on the microtidal James town beach in Ghana                                                               | Beach Profile Changes; Shoreline Location; Wave Modeling                                                               | 11 | Journal of Coastal Research                        | 10.2112/SI75-205.1        |
| 786 | Lin T                                                                    | 2016 | Morphological response to the installation of detached breakwaters along the Cigu coast of Tainan, Taiwan                                                 | Coastal Management; Detached Breakwaters; Engineering Structures; Morphological Change; Windblown Sand                 | 0  | Journal of Coastal Research                        | 10.2112/SI75-178.1        |
| 787 | Zhang X; Zhang Y; Ji Y; Zhang Y; Yang Z                                  | 2016 | Shoreline change of the northern Yellow river Huanghe delta after the latest deltaic course shift in 1976 and its influence factors                       | Shoreline Change; Slope Coefficient; Tidal Height; Yellow River Delta                                                  | 12 | Journal of Coastal Research                        | 10.2112/SI74-005.1        |
| 788 | Bheeroo R; Chandrasekar N; Kaliraj S; Magesh N                           | 2016 | Shoreline change rate and erosion risk assessment along the Trou Aux Bichesmont Choisy beach on the northwest coast of Mauritius using GIS-DSAS technique | Coastal Erosion Risk; DSAS; Geospatial Technique; Mauritius; Remote Sensing and GIS; Shoreline Change; Trou Aux Biches | 42 | Environmental Earth Sciences                       | 10.1007/s12665-016-5311-4 |
| 789 | Sukcharoenpong A; Yilmaz A; Li R                                         | 2016 | An integrated active contour approach to shoreline mapping using HSI and DEM                                                                              | Active Contour Method; Data Integration; HypeRSpectral Imagery (HSI); Level                                            | 12 | IEEE Transactions on Geoscience and Remote Sensing | 10.1109/TGRS.2015.2483641 |

Sets; Shoreline  
Mapping

|     |                                                                                              |      |                                                                                                                                                                         |                                                                                                                         |    |                                                                                                            |                               |
|-----|----------------------------------------------------------------------------------------------|------|-------------------------------------------------------------------------------------------------------------------------------------------------------------------------|-------------------------------------------------------------------------------------------------------------------------|----|------------------------------------------------------------------------------------------------------------|-------------------------------|
| 790 | Nandi S; Ghosh M; Kundu A; Dutta D; Baksi M                                                  | 2016 | Shoreline shifting and its prediction using remote sensing and GIS techniques: A case study of Sagar island west Bengal, India                                          | End Point Rate; India; Linear Regression Model; Sagar Island; Shoreline Change Rate; Shoreline Prediction; Tasseled Cap | 52 | Journal of Coastal Conservation                                                                            | 10.1007/s11852-015-0418-4     |
| 791 | Almonacid-Caballer J; Sánchez-García E; Pardo-Pascual J; Balaguer-Beser A; Palomar-Vázquez J | 2016 | Evaluation of annual mean shoreline position deduced from Landsat imagery as a mid-term coastal evolution indicator                                                     | Annual Mean Shoreline; Bias Seaward Landsat Shorelines; Landsat Imagery; Mid-Term Coastal Evolution                     | 69 | Marine Geology                                                                                             | 10.1016/j.margeo.2015.12.015  |
| 792 | Fan J; Chu J; Jiang D; Liu F; Yao W                                                          | 2016 | Remote sensing images coastline detection based on geometric active contour models                                                                                      | Coastline Change; Geometric Active Contour Model; Remote Sensing; SAR                                                   | 5  | Proceedings of 6th International Conference on Intelligent Control and Information Processing, ICICIP 2015 | 10.1109/ICICIP.2015.7388197   |
| 793 | Choung Y; Jo M                                                                               | 2016 | Shoreline change assessment for various types of coasts using multitemporal Landsat imagery of the east coast of South Korea                                            | NA                                                                                                                      | 29 | Remote Sensing Letters                                                                                     | 10.1080/2150704X.2015.1109157 |
| 794 | Yunus A; Dou J; Avtar R; Narayana A                                                          | 2016 | Shoreline and coastal morphological changes induced by the 2004 Indian ocean tsunami in the Katchal island Andaman and Nicobar: A study using archived satellite images | 2004 Tsunami; Andaman and Nicobar; Erosion; Recovery; Remote Sensing                                                    | 4  | Coastal Research Library                                                                                   | 10.1007/978-3-319-28528-3_5   |

|     |                                                            |      |                                                                                                                                    |                                                                                                            |   |                                                    |                               |
|-----|------------------------------------------------------------|------|------------------------------------------------------------------------------------------------------------------------------------|------------------------------------------------------------------------------------------------------------|---|----------------------------------------------------|-------------------------------|
| 795 | Sun W; Sun Z; Lu X; Wang M; Wang W                         | 2016 | Relationship between coastline changes and the landscape pattern heterogeneity of the salt marshes in the Yellow river delta China | Coastline Change; Landscape Pattern; Salt MaRSh; Yellow River Delta                                        | 3 | Shengtai Xuebao                                    | 10.5846/stxb201401070053      |
| 796 | Narayana A                                                 | 2016 | Shoreline changes                                                                                                                  | NA                                                                                                         | 1 | Encyclopedia of Earth Sciences Series              | 10.1007/978-94-017-8801-4_118 |
| 797 | Anil A G H; Sahin C; Yuksel Y; Çevik E                     | 2016 | Numerical investigation of the impact of a groin system on shoreline evolution                                                     | Black Sea Coast; Groin System; LITPACK; Shoreline Evolution                                                | 0 | Proceedings of The Coastal Engineering Conference  | NA                            |
| 798 | Mikami Y; KoBayashi A; Uda T; Noshi Y                      | 2016 | Longterm shoreline changes on marginal coast of tidal flat in Tokyo Bay and rapid deformation of sand bars owing to tsunami        | 2011 Tsunami; Aerial Photographs; Banzu Tidal Flat; Longshore Sand Transport; Shoreline Changes; Tokyo Bay | 0 | Proceedings of The Coastal Engineering Conference  | NA                            |
| 799 | Rabi S; Collander B; Beltran C; Palo R; Montes J; Garcia P | 2016 | Beach profile dynamics in Dulag Leyte Philippines using Landsat imagery                                                            | DSAS; Landsat; Shoreline; Shoreline Dynamics                                                               | 0 | 37th Asian Conference on Remote Sensing, ACRS 2016 | NA                            |
| 800 | Dewi R; Bijker W; Stein A                                  | 2016 | Multitemporal image analysis for monitoring the changes in fuzzy shorelines                                                        | Coastal Inundation; Confusion Index; Indonesia; Shoreline Change                                           | 0 | 37th Asian Conference on Remote Sensing, ACRS 2016 | NA                            |
| 801 | Manaf S; Mustapha N; Sulaiman M; Husin N; Hamid M          | 2016 | Monitoring shoreline changes in west coast of peninsular Malaysia using statistical analysis techniques                            | Satellite Image; Shoreline Assessment; Shoreline Change; Shoreline Extraction; Shoreline Prediction        | 1 | 37th Asian Conference on Remote Sensing, ACRS 2016 | NA                            |
| 802 | Joesidawati M; Suntoyo S                                   | 2016 | Shoreline change in Tuban district East Java using geospatial and digital shoreline analysis system DSAS techniques                | DSAS; Landsat; Shoreline Change; The Amount of Shoreline                                                   | 5 | International Journal of Oceans and Oceanography   | NA                            |

|     |                                                          |      |                                                                                                                                                |                                                                                                                                                                                         |    |                                                                         |                                      |
|-----|----------------------------------------------------------|------|------------------------------------------------------------------------------------------------------------------------------------------------|-----------------------------------------------------------------------------------------------------------------------------------------------------------------------------------------|----|-------------------------------------------------------------------------|--------------------------------------|
| 803 | Lee I                                                    | 2016 | Instantaneous shoreline mapping from WorldView2 satellite images by using shadow analysis and spectrum matching techniques                     | Image Analysis; Image Segmentation; Oceanography; Remote Sensing                                                                                                                        | 2  | Journal of Marine Science and Technology (Taiwan)                       | 10.6119/JMST-016-1026-9              |
| 804 | Obu J; Lantuit H; Fritz M; Pollard W; Sachs T; Günther F | 2016 | Relation between planimetric and volumetric measurements of permafrost coast erosion a case study from Herschel island western Canadian Arctic | Carbon Fluxes; Coastal Erosion; Digital Elevation Model; Landslides; LIDAR; Mass Wasting                                                                                                | 18 | Polar Research                                                          | 10.3402/polar.v35.30313              |
| 805 | Kallepalli A; Kakani N; James D                          | 2016 | Remote sensing and GIS analysis for demarcation of coastal hazard line along the highly eroding Krishna Godavari delta front                   | Coastal Erosion; Coastal Zone Management; Hazard Line Demarcation; Lobal Warming; Sea Level Rise; Shoreline Change                                                                      | 1  | Proceedings of Spie - The International Society For Optical Engineering | 10.1117/12.2239485                   |
| 806 | Al-Mansoori S; Al-Marzouqi F                             | 2016 | Coastline change mapping using a spectral band method and Sobel edge operator                                                                  | Band Ratios; Coastline Extraction; Dubaisat-1; Dubaisat-2; Normalized Difference Vegetation Index (NDVI); Normalized Difference Water Index (DNWI); Remote Sensing; Sobel Edge Operator | 1  | Proceedings of Spie - The International Society For Optical Engineering | 10.1117/12.2242046                   |
| 807 | Yi W; Yu X; Cui S                                        | 2016 | Analysis method of waterline change from nearshore video images based on ant colony optimization                                               | Ant Colony Optimization; Cielab Color Model; Coastal Zone Monitoring; Video Image; Waterline Detection                                                                                  | 0  | Haiyang Xuebao                                                          | 10.3969/j.jssn.0253-4193.2016.07.007 |



|     |                                               |      |                                                                                                                                                                                                                                                                                                     |                                                                                        |    |                                                                                                                |                                       |
|-----|-----------------------------------------------|------|-----------------------------------------------------------------------------------------------------------------------------------------------------------------------------------------------------------------------------------------------------------------------------------------------------|----------------------------------------------------------------------------------------|----|----------------------------------------------------------------------------------------------------------------|---------------------------------------|
| 808 | Liu Y; Chen B; Liu L; Li P; Du J; Feng A      | 2016 | Coastal erosion and its cause analysis in different spatial temporal scales based on multi sources data in Dongshan island of Fujian province                                                                                                                                                       | Beach Profile; Coastal Erosion; Dongshan Island; Multi Source Data; Remote Sensing     | 3  | Haiyang Xuebao                                                                                                 | 10.3969/j.issn.0253-4193.2016.03.010  |
| 809 | Besset M; Anthony E; Brunier G; Dussouillez P | 2016 | Shoreline change of the Mekong river delta along the southern part of the south China sea coast using satellite image analysis 1973-2014 evolution du littoral du delta du fleuve mékong le long de la partie sud de la mer de chine méridionale à partir dune analyse dimages satellites 1973-2014 | Coastal Erosion; M Angrov Es; Mekong Delta; Satellite IM Ages; South China Sea         | 15 | Geomorphologie: Relief, Processus, Environnement                                                               | 10.4000/geomorphologie.11336          |
| 810 | Čermáková I; Komárková J; Sedlák P            | 2016 | Using UAV to detect shoreline changes: case study Pohranov pond, Czech Republic                                                                                                                                                                                                                     | Change The Landscape; Landscape; Landscape Indices; Pohranov Pond; UAV                 | 9  | International Archives of The Photogrammetry, Remote Sensing and Spatial Information Sciences - ISPRS Archives | 10.5194/isprSARchives-XLI-B1-803-2016 |
| 811 | Michalowska K; Glowienka E; Pekala A          | 2016 | Spatialtemporal detection of changes on the southern coast of the Baltic sea based on multi-temporal aerial photographs                                                                                                                                                                             | Airborne Orthophotomap; Baltic Sea; Change Detection; Coastal Area; Multitemporal Data | 5  | International Archives of The Photogrammetry, Remote Sensing and Spatial Information Sciences - ISPRS Archives | 10.5194/isprSARchives-XLI-B2-49-2016  |

|     |                                        |      |                                                                                                                     |                                                                                    |    |                                                                                                                |                                        |
|-----|----------------------------------------|------|---------------------------------------------------------------------------------------------------------------------|------------------------------------------------------------------------------------|----|----------------------------------------------------------------------------------------------------------------|----------------------------------------|
| 812 | Sabuncu A; Dogru A; Ozener H; Turgut B | 2016 | Detection of coastline deformation using remote sensing and geodetic surveys                                        | Geodetic Survey; GPS; Landsat 5; Landsat 7; Remote Sensing; Shoreline              | 6  | International Archives of The Photogrammetry, Remote Sensing and Spatial Information Sciences - ISPRS Archives | 10.5194/isprSARchives-XLI-B8-1169-2016 |
| 813 | Mi H; Wang W; Qiao G                   | 2016 | Shanghai shoreline evolution interpreted from historical atlas and remote sensing imagery over the past 2,200 years | Atlas; Evolution; Remote Sensing; Shanghai; Shoreline Change                       | 1  | International Archives of The Photogrammetry, Remote Sensing and Spatial Information Sciences - ISPRS Archives | 10.5194/isprSARchives-XLI-B8-1157-2016 |
| 814 | Kröhnert M                             | 2016 | Automatic waterline extraction from smartphone images                                                               | Crowdsourcing; Flood Monitoring; Image Analysis; Smartphones; Texture Measures     | 3  | International Archives of The Photogrammetry, Remote Sensing and Spatial Information Sciences - ISPRS Archives | 10.5194/isprSARchives-XLI-B5-857-2016  |
| 815 | Beluru J A; Hegde A                    | 2016 | GIS based approach for vulnerability assessment of the Karnataka coast India                                        | NA                                                                                 | 16 | Advances In Civil Engineering                                                                                  | 10.1155/2016/5642523                   |
| 816 | Yunus M; Omar C; Ismail Z              | 2016 | GIS-based assessment of mangrove response to shoreline change along the coast of Kukup island Johor                 | DSAS; GIS; Mangrove; Shoreline; Statistical Method                                 | 0  | Arpn Journal of Engineering and Applied Sciences                                                               | NA                                     |
| 817 | Dewi R; Bijker W; Stein A; Marfai M    | 2016 | Fuzzy classification for shoreline change monitoring in a part of the northern coastal area of Java, Indonesia      | Coastal Inundation; Fuzzy Classification; Indonesia; Shoreline Change; Uncertainty | 31 | Remote Sensing                                                                                                 | 10.3390/rs8030190                      |

|      |                                                |      |                                                                                                                                                                                 |                                                                                                                 |    |                                               |                              |
|------|------------------------------------------------|------|---------------------------------------------------------------------------------------------------------------------------------------------------------------------------------|-----------------------------------------------------------------------------------------------------------------|----|-----------------------------------------------|------------------------------|
| 818  | Wu T; Hou X                                    | 2016 | Review of research on coastline changes                                                                                                                                         | Accuracy Control; Coastline; Driving FactorS; Extraction by Remote Sensing; Spatial Variation                   | 12 | Shengtai Xuebao                               | 10.5846/stxb201406181270     |
| 819  | Ayadi K; Boutiba M; Sabatier F; Guettouche M   | 2016 | Detection and analysis of historical variations in the shoreline using digital aerial photos satellite images and topographic surveys dGPS: case of the Bejaia Bay east Algeria | Advance; Aerial Photographs; Bejaia Bay; Coastal Erosion; Coastline; Retreat                                    | 26 | Arabian Journal of Geosciences                | 10.1007/s12517-015-2043-9    |
| 1431 | Liu Y; Li J; Yuan Q; Shi X; Pu R; Yang L; Lu X | 2016 | Comparative research on the impact of human activities on changes in coastline and landscape in Bay areas a case study with Xiangshangang Bay, China and Tampa Bay, USA         | Bay Coastline; Bay Landscape; Coastline Change; Human Activities; Tampa Bay; Xiangshangang Bay                  | 4  | Dili Xuebao/Acta Geographica Sinica           | 10.11821/dlxb201601007       |
| 1432 | Hou X; Hou W; Wu T                             | 2016 | Shape changes of major Gulfs along the mainland of China since the early 1940s                                                                                                  | China; Gulf; Gulf Area; Gulf Centroid; Gulf Shape Index; Sea Reclamation; Shoreline Change; Shoreline Structure | 7  | Dili Xuebao/Acta Geographica Sinica           | 10.11821/dlxb201601009       |
| 1847 | Puig M; Del R L; Plomaritis T; Benavente J     | 2016 | Contribution of storms to shoreline changes in mesotidal dissipative beaches: case study in the Gulf of Cadiz SW Spain                                                          | NA                                                                                                              | 5  | Natural Hazards and Earth System Sciences     | 10.5194/nhess-16-2543-2016   |
| 1851 | De A I; Carvalho B; Guerra J                   | 2016 | Applying Landsat imagery to the study of morphological variations of sandy spits along the Caravelas coastal plain NE Brazil                                                    | Coastal Geomorphology; Remote Sensing; Coastal Processes                                                        | 0  | Revista Brasileira De Geomorfologia           | 10.20502/rbg.v17i4.843       |
| 1869 | Besset M; Anthony E; Brunier G; Dussouillez P  | 2016 | Shoreline change of the Mekong river delta along the southern part of the south China sea coast using satellite image analysis 1973-2014                                        | Mekong Delta; South China Sea; Coastal Erosion; Mangroves; Satellite Images                                     | 12 | Geomorphologie-Relief Processus Environnement | 10.4000/geomorphologie.11336 |

|      |                                 |      |                                                                                                                                                                            |                                                                                                                                      |    |                                                                             |                                |
|------|---------------------------------|------|----------------------------------------------------------------------------------------------------------------------------------------------------------------------------|--------------------------------------------------------------------------------------------------------------------------------------|----|-----------------------------------------------------------------------------|--------------------------------|
| 1871 | Mann T; Westphal H              | 2016 | Multidecadal shoreline changes on Taku Atoll Papua New Guinea observational evidence of early reef island recovery after the impact of storm waves                         | Reef Island Dynamics; High-Magnitude Event; Shoreline Fluctuation; Sea-Level Rise                                                    | 10 | Geomorphology                                                               | 10.1016/j.geomorph.2015.12.028 |
| 1886 | Temiz F; Durduran S             | 2016 | Monitoring coastline change using remote sensing and GIS technology: A case study of Acigol lake: Turkey                                                                   | NA                                                                                                                                   | 5  | World Multidisciplinary Earth Sciences Symposium (Wmess 2016), Pts 1-4      | 10.1088/1755-1315/44/4/042033  |
| 1887 | Starek M; Harmon R; Mitasova H  | 2016 | Fort fisher NC past and present a geospatial analysis using Lidar and GIS                                                                                                  | LIDAR; Coastal Erosion; Civil War; Spatial Modeling                                                                                  | 0  | Military Geosciences and Desert Warfare: Past Lessons and Modern Challenges | 10.1007/978-1-4939-3429-4_7    |
| 645  | Fuad M; Fais D A M              | 2017 | Automatic detection of decadal shoreline change on northern coastal of Gresik east Java, Indonesia                                                                         | DSAS; Gresik Coast; Landsat Imagery; Shoreline Change                                                                                | 5  | IOP Conference Series: Earth and Environmental Science                      | 10.1088/1755-1315/98/1/012001  |
| 646  | Overbeck J; Buzard R; Maio C    | 2017 | Storm impacts in western Alaska documenting shoreline change and flooding through remote sensing and community-based monitoring                                            | Community-Based Monitoring; Erosion; Flooding; Time-Lapse; Western Alaska                                                            | 0  | Oceans 2017 - Anchorage                                                     | NA                             |
| 647  | Kupilik M; Witmer F; Wang C     | 2017 | Predictive Arctic coastal erosion modeling via gaussian process identification                                                                                             | Coastal Erosion; Gaussian Process; Machine Learning                                                                                  | 1  | Oceans 2017 - Anchorage                                                     | NA                             |
| 648  | Fraser C; Bernatchez P; Dugas S | 2017 | Development of a GIS coastal land use planning tool for coastal erosion adaptation based on the exposure of buildings and infrastructure to coastal erosion Québec, Canada | Adaptation Tool; Coastal Erosion; Coastal Hazards; Exposure Assessment; GIS Planning Tool; Knowledge Transfer Process; Vulnerability | 15 | Geomatics, Natural Hazards and Risk                                         | 10.1080/19475705.2017.1294114  |

|     |                                                                                                             |      |                                                                                                                                                     |                                                                                                                                                             |    |                                                                |                                |
|-----|-------------------------------------------------------------------------------------------------------------|------|-----------------------------------------------------------------------------------------------------------------------------------------------------|-------------------------------------------------------------------------------------------------------------------------------------------------------------|----|----------------------------------------------------------------|--------------------------------|
| 649 | Temiz F; Bozdag A;<br>Durduran S; Gumus M                                                                   | 2017 | Monitoring coastline change using remote sensing and GIS technology: A case study of Burdur lake, Turkey                                            | Burdur Lake; GIS; Land Use; Remote Sensing; Swot Analysis                                                                                                   | 7  | Fresenius Environmental Bulletin                               | NA                             |
| 650 | Rumyantsev V;<br>Pozdnyakov S; Ulichev V;<br>Chichkova E; Ryzhikov D                                        | 2017 | Evaluation of the variability of the shoreline of the Tsimlyansk reservoir and lake Ilmen according to space sounding data                          | Lake Ilmen; Landsat; Remote Sensing; Shoreline; Terra/Modis; Tsimlyansk Reservoir; Water Code of The Russian Federation; Water Level; Water Protection Zone | 1  | Izvestiya - Atmospheric and Ocean Physics                      | 10.1134/S0001433817090262      |
| 651 | Duvat V; Volto N; Salmon C                                                                                  | 2017 | Impacts of category 5 tropical cyclone Fantala April 2016 on Farquhar Atoll Seychelles islands, Indian ocean                                        | Atoll Reef Islands; Satellite Image Analysis; Sediment Transport Pathways; Seychelles Islands; Shoreline Changes; Tropical Cyclone Impacts                  | 13 | Geomorphology                                                  | 10.1016/j.geomorph.2017.09.022 |
| 652 | Eom J; Lee C; Jang J; Choi J; Park S                                                                        | 2017 | Study on environmental change monitoring between shoreline change and suspended sediment concentration using Landsat images in Nakdong river, Korea | Landsat Tm/Etm+; Nakdong River; Shoreline Change; Suspended Sediment Concentration (SSX)                                                                    | 0  | International Geoscience and Remote Sensing Symposium (IGARSS) | 10.1109/IGARSS.2017.8127779    |
| 653 | Banks S; Millard K;<br>Behnamian A; White L;<br>Ullmann T; Charbonneau F; Chen Z; Wang H; Pasher J; Duffe J | 2017 | Contributions of actual and simulated satellite SAR data for substrate type differentiation and shoreline mapping in the Canadian Arctic            | Arctic; Radarsat Constellation Mission; Radarsat-2; Random Forests; Shorelines                                                                              | 13 | Remote Sensing                                                 | 10.3390/rs9121206              |
| 654 | Tan C; Mohd-Mokhtar R;<br>Arshad M                                                                          | 2017 | Heading control and shoreline detection for river navigation using autonomous surface vessel                                                        | Autonomous Surface Vessel (ASV); Heading Control Scheme; Hough Transform; Image Segmentation; Shoreline Detection                                           | 0  | Indian Journal of Geo-Marine Sciences                          | NA                             |

|     |                                                                       |      |                                                                                                                                          |                                                                                                         |    |                                                                                     |                                       |
|-----|-----------------------------------------------------------------------|------|------------------------------------------------------------------------------------------------------------------------------------------|---------------------------------------------------------------------------------------------------------|----|-------------------------------------------------------------------------------------|---------------------------------------|
| 655 | Mohanty P; Mahendra R; Nayak R; Kumar T                               | 2017 | Impact of sea level rise and coastal slope on shoreline change along the Indian coast                                                    | Altimeter; Bruun Rule; Coastal Slope; DSAS; Landsat; Satellite Data; Sea Level Trend                    | 4  | Natural Hazards                                                                     | 10.1007/s11069-017-3018-9             |
| 656 | Pagán J; López I; Aragonés L; Garcia-Barba J                          | 2017 | The effects of the anthropic actions on the sandy beaches of Guardamar del Segura, Spain                                                 | Anthropic; Beach Erosion; GIS; Sand; Shoreline Evolution                                                | 28 | Science of The total Environment                                                    | 10.1016/j.scitotenv.2017.05.272       |
| 657 | Bayram B; Sen A; Selbesoglu M; Varna I; Petersons P; Aykut N; Seker D | 2017 | Comparison of two simplification methods for shoreline extraction from digital orthophoto images                                         | Image Segmentation; Orthophoto Image; Shoreline Extraction; Shoreline Simplification; SLIC              | 0  | ISPRS Annals of The Photogrammetry, Remote Sensing and Spatial Information Sciences | 10.5194/isprs-annals-IV-4-W4-147-2017 |
| 658 | Bayram B; Erdem F; Akpınar B; Ince A; Bozkurt S; Catal R H; Seker D   | 2017 | The efficiency of random forest method for shoreline extraction from Landsat-8 and GOKTURK2 imageries                                    | Gokturk-2; Image Segmentation; Landsat-8; Random Forest; Shoreline Extraction                           | 7  | ISPRS Annals of The Photogrammetry, Remote Sensing and Spatial Information Sciences | 10.5194/isprs-annals-IV-4-W4-141-2017 |
| 659 | Evadzi P; Zorita E; Hünicke B                                         | 2017 | Quantifying and predicting the contribution of sea-level rise to shoreline change in Ghana information for coastal adaptation strategies | Climate Change; Coastal Impacts; Geographic Information System; Remote Sensing                          | 11 | Journal of Coastal Research                                                         | 10.2112/JCOASTRES-D-16-00119.1        |
| 660 | Huang C; Chen Y; Zhang S; Li L; Shi K; Liu R                          | 2017 | Spatial downscaling of Suomi NPP-VIIRS image for lake mapping                                                                            | Lake Shoreline Mapping; Linear Spectral Unmixing; Poyang Lake; Subpixel Mapping; Surface Water Dynamics | 6  | Water (Switzerland)                                                                 | 10.3390/w9110834                      |

|     |                                                                                                     |      |                                                                                                                                                    |                                                                                                                                                       |    |                                                                                 |                               |
|-----|-----------------------------------------------------------------------------------------------------|------|----------------------------------------------------------------------------------------------------------------------------------------------------|-------------------------------------------------------------------------------------------------------------------------------------------------------|----|---------------------------------------------------------------------------------|-------------------------------|
| 661 | Kesikoglu M; Cicekli S; Kaynak T; Ozkan C                                                           | 2017 | The determination of coastline changes using Artificial Neural Networks in Yamula dam lake, Turkey                                                 | Artificial Neural Networks; Change Detection; Landsat 8; Post Classification Comparison; Satellite Image                                              | 6  | ICIT 2017 - 8th International Conference on Information Technology, Proceedings | 10.1109/ICITECH.2017.8079936  |
| 662 | Rishikeshan C; Ramesh H                                                                             | 2017 | A novel mathematical morphology based algorithm for shoreline extraction from satellite images                                                     | Feature Extraction; Mathematical Morphology; Remote Sensing; Satellite Image Processing; Shoreline Detection                                          | 19 | Geo-Spatial Information Science                                                 | 10.1080/10095020.2017.1403089 |
| 663 | Jana A; Maiti S; Biswas A                                                                           | 2017 | Appraisal of longterm shoreline oscillations from a part of coastal zones of Sundarban delta eastern India: A study based on geospatial technology | Digital Shoreline Analysis System; Multispectral Satellite Data; Shoreline Change Rate; Sundarban Delta                                               | 5  | Spatial Information Research                                                    | 10.1007/s41324-017-0139-x     |
| 664 | Yang H; Li E; Zhao Y; Liang Q                                                                       | 2017 | Effect of water-sediment regulation and its impact on coastline and suspended sediment concentration in Yellow river estuary                       | Coastline; Remote Sensing; Suspended Sediment Concentration; Water-Sediment Regulation; Yellow River Estuary                                          | 17 | Water Science and Engineering                                                   | 10.1016/j.wse.2017.12.009     |
| 665 | Barbaro G; Fiamma V; Barrile V; Foti G; Ielo G                                                      | 2017 | Analysis of the shoreline changes of Reggio Calabria, Italy                                                                                        | Causes of Evolutionary Phenomena; Interaction Between Longshore and River Sediment Transport; Rainfall Regime; Shoreline Evolution; UAV; Wave Climate | 22 | International Journal of Civil Engineering and Technology                       | NA                            |
| 666 | Zaggia L; Lorenzetti G; Manfé G; Scarpa G; Molinaroli E; Parnell K; Rapaglia J; Gionta M; Soomere T | 2017 | Fast shoreline erosion induced by ship wakes in a coastal lagoon field evidence and remote sensing analysis                                        | NA                                                                                                                                                    | 22 | Plos One                                                                        | 10.1371/journal.pone.0187210  |

|     |                                                                                                                 |      |                                                                                                                                             |                                                                                                                            |    |                                              |                            |
|-----|-----------------------------------------------------------------------------------------------------------------|------|---------------------------------------------------------------------------------------------------------------------------------------------|----------------------------------------------------------------------------------------------------------------------------|----|----------------------------------------------|----------------------------|
| 667 | Yan X; Hu Y; Chang Y;<br>Zhang D; Liu M; Guo J;<br>Ren B                                                        | 2017 | Monitoring wetland changes<br>both outside and inside<br>reclamation areas for coastal<br>management of the northern<br>Liaodong Bay, China | Landscape<br>Succession;<br>Liaodong Bay;<br>Reclamation;<br>Shoreline Change                                              | 11 | Wetlands                                     | 10.1007/s13157-017-0922-4  |
| 668 | Xu N; Gong P                                                                                                    | 2017 | Satellite observation of coastline<br>change around Hay point<br>Australia before and after<br>tropical cyclone Debbie                      | Coastline Change;<br>Debbie; Landsat-8<br>Oli; Satellite<br>Observation;<br>Tropical Cyclone                               | 0  | Kexue<br>tongbao/Chinese<br>Science Bulletin | 10.1360/N972017-00451      |
| 669 | Manno G; Lo R C; Ciraolo<br>G                                                                                   | 2017 | Uncertainties in shoreline<br>position analysis the role of run-<br>up and tide in a gentle slope<br>beach                                  | NA                                                                                                                         | 9  | Ocean Science                                | 10.5194/os-13-661-2017     |
| 670 | Liu J; De M D; Nguyen T;<br>Saito Y; Nguyen V; Ta T; Li<br>X                                                    | 2017 | Stratigraphic formation of the<br>Mekong river delta and its recent<br>shoreline changes                                                    | NA                                                                                                                         | 28 | Oceanography                                 | 10.5670/oceanog.2017.316   |
| 671 | Quang T N; Cong T H;<br>Quang D L; Anh T T                                                                      | 2017 | Historical monitoring of<br>shoreline changes in the Cua Dai<br>estuary Central Vietnam using<br>multitemporal remote sensing<br>data       | Historical Monitoring;<br>Muti-Temporal<br>Satellite Remote<br>Sensing; Shoreline<br>Changes                               | 11 | Geosciences<br>(Switzerland)                 | 10.3390/geosciences7030072 |
| 672 | Mitra S; Mitra D; Santra A                                                                                      | 2017 | Performance testing of selected<br>automated coastline detection<br>techniques applied on<br>multispectral satellite imageries              | Accuracy; Coastline;<br>Image Processing;<br>Kappa Statistics;<br>Remote Sensing;<br>Water Index                           | 11 | Earth Science<br>Informatics                 | 10.1007/s12145-017-0289-3  |
| 673 | Didier D; Bernatchez P;<br>Augereau E; Caulet C;<br>Dumont D; Bismuth E;<br>Cormier L; Floc'H F;<br>Delacourt C | 2017 | Lidar validation of a video-<br>derived beachface topography<br>on a tidal flat                                                             | Atlantic Canada;<br>Beach Morphology;<br>Erosion; Mobile<br>Terrestrial LIDAR;<br>Shoreline Detection;<br>Video Monitoring | 9  | Remote Sensing                               | 10.3390/rs9080826          |
| 674 | Zeinali S; Dehghani M;<br>Rastegar M; Mojarrad M                                                                | 2017 | Detecting shoreline changes in<br>Chabahar Bay by processing<br>satellite images                                                            | Chabahar; Change<br>Detection; Satellite<br>Image; Sensor;<br>Shoreline                                                    | 1  | Scientia Iranica                             | 10.24200/sci.2017.4271     |



|     |                                                                                                |      |                                                                                                                       |                                                                                                                                                                                                           |    |                                         |                                    |
|-----|------------------------------------------------------------------------------------------------|------|-----------------------------------------------------------------------------------------------------------------------|-----------------------------------------------------------------------------------------------------------------------------------------------------------------------------------------------------------|----|-----------------------------------------|------------------------------------|
| 675 | Alharbi O; Phillips M; Williams A; Thomas T; Hakami M; Kerbe J; Niang A; Hermas E; Al-Ghamdi K | 2017 | Temporal shoreline change and infrastructure influences along the southern Red sea coast of Saudi Arabia              | Environmental Forcing; Human Intervention; Landsat Imagery; Shoreline Change; Wave Regime                                                                                                                 | 6  | Arabian Journal of Geosciences          | 10.1007/s12517-017-3109-7          |
| 676 | Duru U                                                                                         | 2017 | Shoreline change assessment using multitemporal satellite images a case study of lake Sapanca NW Turkey               | Coastal Management; DSAS; Lake Sapanca; Landsat Imagery; Shoreline Change Detection                                                                                                                       | 20 | Environmental Monitoring and Assessment | 10.1007/s10661-017-6112-2          |
| 677 | Goncalves R; Awange J                                                                          | 2017 | Three most widely used GNSS-based shoreline monitoring methods to support integrated coastal zone management policies | Coastal Monitoring; Global Navigation Satellite Systems (Gnss); Integrated Coastal Zone Management (ICZM); Precise Point Positioning (PPP); Real-Time Kinematic (RTK); Relative Kinematic (RK); Shoreline | 15 | Journal of Surveying Engineering        | 10.1061/(ASCE)SU.1943-5428.0000219 |
| 678 | Wernette P; Shortridge A; Lusch D; Arbogast A                                                  | 2017 | Accounting for positional uncertainty in historical shoreline change analysis without ground reference information    | NA                                                                                                                                                                                                        | 12 | International Journal of Remote Sensing | 10.1080/01431161.2017.1303218      |
| 679 | Ibrahim I; Asmawi M; Jaafar S                                                                  | 2017 | Temporal geospatial shorelines changes analysis in Klang coastal area                                                 | Coastal Erosion; GIS; Klang; Remote Sensing; Shoreline                                                                                                                                                    | 1  | Advanced Science Letters                | 10.1166/asl.2017.9270              |
| 680 | Kallepalli A; Kakani N; James D; Richardson M                                                  | 2017 | Digital shoreline analysis system-based change detection along the highly eroding Krishna Godavari delta front        | Coastal Erosion; Coastal Zone Management; Global Warming; Hazard Line Demarcation; Sea Level Rise; Shoreline Change                                                                                       | 10 | Journal of Applied Remote Sensing       | 10.1117/1.JRS.11.036018            |

|     |                                                                                                                              |      |                                                                                                                                                                    |                                                                                                                                                |    |                                          |                                    |
|-----|------------------------------------------------------------------------------------------------------------------------------|------|--------------------------------------------------------------------------------------------------------------------------------------------------------------------|------------------------------------------------------------------------------------------------------------------------------------------------|----|------------------------------------------|------------------------------------|
| 681 | Muru M; Rosentau A;<br>Kriiska A; Lõugas L;<br>Kadakas U; Vassiljev J;<br>Saarse L; Aunap R; Küttim<br>L; Puusepp L; Kihno K | 2017 | Sea level changes and neolithic<br>Hunterfishergatherers in the<br>centre of Tallinn southern coast<br>of the Gulf of Finland Baltic sea                           | Baltic Sea;<br>Landscape Modelling;<br>Neolithic Settlement;<br>Palaeogeographic<br>Reconstruction;<br>Relative Sea Level;<br>Shoreline Change | 15 | Holocene                                 | 10.1177/0959683616678462           |
| 682 | Bugajny N; Furmańczyk K                                                                                                      | 2017 | Comparison of short-term<br>changes caused by storms along<br>natural and protected sections of<br>the Dziwnow spit southern<br>Baltic coast                       | Dune Coast;<br>Hydrodynamic<br>Classification;<br>Nontidal Sea;<br>Shoreline<br>Displacement;<br>Volume Changes                                | 7  | Journal of Coastal<br>Research           | 10.2112/JCOASTRES-D-16-<br>00055.1 |
| 683 | Darwish K; Smith S; Torab<br>M; Monsef H; Hussein O                                                                          | 2017 | Geomorphological changes<br>along the Nile delta coastline<br>between 1945 and 2015 detected<br>using satellite remote sensing<br>and GIS                          | Aswan High Dam;<br>Coastal Erosion<br>Hazard; Coastal<br>Morphology; DSAS;<br>Shoreline Changes                                                | 22 | Journal of Coastal<br>Research           | 10.2112/JCOASTRES-D-16-<br>00056.1 |
| 684 | Djouder F; Boutiba M                                                                                                         | 2017 | Vulnerability assessment of<br>coastal areas to sea level rise<br>from the physical and<br>socioeconomic parameters case<br>of the Gulf coast of Bejaia<br>Algeria | CVI; Geographical<br>Information Systems;<br>Geomorphology;<br>Gulf Coast of Bejaia;<br>Mediterranean Sea<br>Level Rise; Risk                  | 18 | Arabian Journal of<br>Geosciences        | 10.1007/s12517-017-3062-5          |
| 685 | Vandebroek E;<br>Lindenbergh R; Van L F;<br>De S M; De V S; Hanssen R                                                        | 2017 | Semi-automated monitoring of a<br>mega-scale beach nourishment<br>using high-resolution TerraSAR-<br>X satellite data                                              | Beach Nourishment;<br>Coastal Dynamics;<br>High-Resolution SAR<br>Imagery; Sand<br>Motor; Shoreline;<br>TerraSAR-X                             | 15 | Remote Sensing                           | 10.3390/rs9070653                  |
| 686 | Selamat S; Abdul M K;<br>Jaafar O; Ahmad H                                                                                   | 2017 | Extraction of shoreline changes<br>in Selangor coastal area using<br>GIS and remote sensing<br>techniques                                                          | NA                                                                                                                                             | 4  | Journal of Physics:<br>Conference Series | 10.1088/1742-<br>6596/852/1/012031 |

|     |                                                                                            |      |                                                                                                                                              |                                                                                                                                                                                    |    |                                                                                                                                     |                                               |
|-----|--------------------------------------------------------------------------------------------|------|----------------------------------------------------------------------------------------------------------------------------------------------|------------------------------------------------------------------------------------------------------------------------------------------------------------------------------------|----|-------------------------------------------------------------------------------------------------------------------------------------|-----------------------------------------------|
| 687 | Tahri M; Maanan M;<br>Maanan M; Bouksim H;<br>Hakdaoui M                                   | 2017 | Using fuzzy analytic hierarchy<br>process multicriteria and<br>automatic computation to<br>analyse coastal vulnerability                     | Coastal Hazard;<br>Coastal Management;<br>Coastal Risk<br>Vulnerability;<br>Digital Shoreline<br>Analysis System;<br>Fuzzy Analytic<br>Hierarchy Process                           | 25 | Progress In<br>Physical<br>Geography                                                                                                | 10.1177/0309133317695158                      |
| 688 | Sunder S; Ramsankaran R;<br>Ramakrishnan B                                                 | 2017 | Intercomparison of remote<br>sensing sensing-based shoreline<br>mapping techniques at different<br>coastal stretches of India                | AWEI; Band Ratio;<br>Landsat; MNDWI;<br>NDWI; Shoreline<br>Detection                                                                                                               | 24 | Environmental<br>Monitoring and<br>Assessment                                                                                       | 10.1007/s10661-017-5996-1                     |
| 689 | Fu Y; Guo Q; Wu X; Fang<br>H; Pan Y                                                        | 2017 | Analysis and prediction of<br>changes in coastline morphology<br>in the Bohai sea China using<br>remote sensing                              | Coastline Change;<br>Fitting; Prediction;<br>Shape Index                                                                                                                           | 5  | Sustainability<br>(Switzerland)                                                                                                     | 10.3390/su9060900                             |
| 690 | Zhan Y; Zhu L; Sun Y; Su<br>X; Hou H                                                       | 2017 | Automatic extraction of coastline<br>via spectral angle-distance<br>similarity growth model                                                  | Angle-Distance<br>Similarity; Coastline;<br>IRS; Remote Sensing                                                                                                                    | 3  | Yaogan<br>Xuebao/Journal of<br>Remote Sensing                                                                                       | 10.11834/jrs.20176157                         |
| 691 | Sadio M; Anthony E; Diaw<br>A; Dussouillez P; Fleury J;<br>Kane A; Almar R;<br>Kestenare E | 2017 | Shoreline changes on the wave-<br>influenced Senegal river delta<br>West Africa the roles of natural<br>processes and human<br>interventions | Delta Vulnerability;<br>Era Hindcast Waves;<br>Langue De Barbarie<br>Spit; Longshore<br>Sediment Transport;<br>River-Mouth<br>Migration; Senegal<br>River Delta; Spit<br>Breaching | 21 | Water<br>(Switzerland)                                                                                                              | 10.3390/w9050357                              |
| 692 | Pervez W; Khan S;<br>Hussain E; Amir F; Maud<br>M                                          | 2017 | Evaluate the capability of<br>Landsat-8 operational land<br>imager for shoreline change<br>detection inland water studies                    | Change Detection<br>Analysis; Imaging<br>Sciences;<br>Operational Land<br>Imager; Remote<br>Sensing; Satellite<br>Image Processing                                                 | 3  | International<br>Archives of The<br>Photogrammetry,<br>Remote Sensing<br>and Spatial<br>Information<br>Sciences - ISPRS<br>Archives | 10.5194/isprs-Archives-XLII-<br>5-W1-145-2017 |

|     |                                                      |      |                                                                                                                           |                                                                                                                                           |    |                             |                                |
|-----|------------------------------------------------------|------|---------------------------------------------------------------------------------------------------------------------------|-------------------------------------------------------------------------------------------------------------------------------------------|----|-----------------------------|--------------------------------|
| 693 | Ismail S; Zulkifley M; Hussain A; Mustafa M; Muad A  | 2017 | Automated shoreline detection using natural colour composite on SPOT-5 satellite imagery                                  | Natural Colour Composite; Threshold; Vegetation Indices                                                                                   | 0  | Advanced Science Letters    | 10.1166/asl.2017.8930          |
| 694 | Paine J; Caudle T; Andrews J                         | 2017 | Shoreline and sand storage dynamics from annual airborne Lidar surveys Texas, Gulf coast                                  | Beach Profiles; Coastal Change; Sediment Budget; Storm Erosion and Recovery                                                               | 11 | Journal of Coastal Research | 10.2112/JCOASTRES-D-15-00241.1 |
| 695 | Caudle T; Paine J                                    | 2017 | Applications of coastal data collected in the Texas high school coastal monitoring program (THSCMP)                       | Beach; Beach Profiles; Coastal Processes; Dune; Student Monitoring; Texas Gulf Coast                                                      | 2  | Journal of Coastal Research | 10.2112/JCOASTRES-D-16-00033.1 |
| 696 | Gómez J; Byrne M; Hamilton J; Isla F                 | 2017 | Historical coastal evolution and dune vegetation in Isla Salamanca national park, Colombia                                | Caribbean Coast; Coastal Changes; Coastal Dunes; Dune Vegetation; Geomorphological Mapping; Radiocarbon Dating; Vegetation DiverSity      | 6  | Journal of Coastal Research | 10.2112/JCOASTRES-D-15-00189.1 |
| 697 | Cao W; Li R; Chi X; Chen N; Chen J; Zhang H; Zhang F | 2017 | Island urbanization and its ecological consequences: A case study in the Zhoushan island east China                       | DMSP/OLS Nighttime Lights; Ecosystem Service; Geographically Weighted Regression; Island Management; Island Urbanization; Land Use Change | 42 | Ecological Indicators       | 10.1016/j.ecolind.2017.01.001  |
| 698 | Eulie D; Walsh J; Corbett D; Mulligan R              | 2017 | Temporal and spatial dynamics of estuarine shoreline change in the Albemarle Pamlico estuarine system North Carolina, USA | Coastal Management; Estuarine Sediments; Estuarine Shorelines; Hydrodynamic and Wave Modeling; Shoreline Erosion; Storms                  | 17 | Estuaries and Coasts        | 10.1007/s12237-016-0143-8      |

|     |                                                                        |      |                                                                                                                                             |                                                                                                                                                                                                        |    |                                                      |                               |
|-----|------------------------------------------------------------------------|------|---------------------------------------------------------------------------------------------------------------------------------------------|--------------------------------------------------------------------------------------------------------------------------------------------------------------------------------------------------------|----|------------------------------------------------------|-------------------------------|
| 699 | Watson E; Raposa K; Carey J; Wigand C; Warren R                        | 2017 | Anthropocene survival of southern New England's salt marshes                                                                                | Anthropogenic Impacts; Climate Change; Coastal Adaptation; Elevation Capital; Sea Level Rise; Spartina Alterniflora; Spartina Patens; Storms; Submergence; Superstorm Sandy; Vegetation Loss; Wetlands | 26 | Estuaries and Coasts                                 | 10.1007/s12237-016-0166-1     |
| 700 | Nayak S                                                                | 2017 | Coastal zone management in India present status and future needs                                                                            | Coastal Management; Coastal Zone; Habitats; India; Living Resources; Processes; Water Quality                                                                                                          | 23 | Geo-Spatial Information Science                      | 10.1080/10095020.2017.1333715 |
| 701 | Wang C; Zhao Y; Zou X; Xu X; Ge C                                      | 2017 | Recent changing patterns of the Changjiang Yangtze river estuary caused by human activities                                                 | Changjiang (Yangtze River) Estuary; Coastal Engineering; Coastline Change; Remote Sensing; Sediment Load                                                                                               | 3  | Acta Oceanologica Sinica                             | 10.1007/s13131-017-1017-z     |
| 702 | Andreou G; Opitz R; Manning S; Fisher K; Sewell D; Georgiou A; Urban T | 2017 | Integrated methods for understanding and monitoring the loss of coastal archaeological sites: The case of Tochnilakkia south-central Cyprus | Aerial Photography; Coastal Archaeology; Cyprus; Eastern Mediterranean; Erosion Monitoring; Laser Scanning                                                                                             | 15 | Journal of Archaeological Science: Reports           | 10.1016/j.jasrep.2017.01.025  |
| 703 | Emran A; Rob M; Kabir M                                                | 2017 | Coastline change and erosion/accretion evolution of the Sandwip island, Bangladesh                                                          | Change Detection; Coastal Change; Erosion-Accretion; GIS; Remote Sensing                                                                                                                               | 4  | International Journal of Applied Geospatial Research | 10.4018/IJAGR.2017040103      |
| 704 | Ali W; Kaiser M; Kholief S; El-Tahan M                                 | 2017 | Assessment of coastal changes along Baltim resort, Egypt using remote sensing and DSAS method                                               | Baltim; DSAS; GIS; Landsat 8; Quality Assessment; RS; Shoreline                                                                                                                                        | 0  | Egyptian Journal of Aquatic Biology and Fisheries    | 10.21608/ejabf.2017.2380      |

|     |                                               |      |                                                                                                                                                                     |                                                                                                   |    |                                                   |                                |
|-----|-----------------------------------------------|------|---------------------------------------------------------------------------------------------------------------------------------------------------------------------|---------------------------------------------------------------------------------------------------|----|---------------------------------------------------|--------------------------------|
| 705 | Ali W; Kaiser M; Kholief S; El-Tahan M        | 2017 | Assessment of shoreline stability and solidity for future investment plans at Ras Elbar resort, Egyt                                                                | DSAS; Egypt sat; Erdas Imagine; GIS; Landsat 8; Ras El-Bar; Shoreline                             | 1  | Egyptian Journal of Aquatic Biology and Fisheries | 10.21608/ejabf.2017.2377       |
| 706 | Rangoonwala A; Jones C; Chi Z; Ramsey I       | 2017 | Operational shoreline mapping with high spatial resolution radar and geographic processing                                                                          | NA                                                                                                | 0  | Photogrammetric Engineering and Remote Sensing    | 10.14358/PERS.83.3.237         |
| 707 | Son S; Kim J; Yoon H; Jung T; Do K; Shin S    | 2017 | An observational and numerical study of stormin-duced morphologic changes at Sanpo beach Korea                                                                      | Field Observation; Morphodynamic Modeling.; Sediment Transport; Storm Surge                       | 1  | Journal of Coastal Research                       | 10.2112/SI79-068.1             |
| 708 | Ahn Y; Shin B; Kim K                          | 2017 | Shoreline change monitoring using high resolution digital photogrammetric technique                                                                                 | Collinearity Equation; Image Process; Photogrammetric; Shoreline Change; Time Lapse Camera System | 7  | Journal of Coastal Research                       | 10.2112/SI79-042.1             |
| 709 | Kim H; Lee S; Min K                           | 2017 | Shoreline change analysis using airborne Lidar bathymetry for coastal monitoring                                                                                    | Airborne Bathymetry LIDAR; Coastal Monitoring; Erosion; Shoreline Change                          | 17 | Journal of Coastal Research                       | 10.2112/SI79-055.1             |
| 710 | Oakley B; Manzi M; Su-meersarnauth B; Boyle S | 2017 | The block island bluff image project using google earth spreadsheet mapper and google drive to build a database of spatially located field images of coastal bluffs | Field Images; Photo-mosaic; Repeat Photography; Shoreline Change                                  | 0  | Journal of Coastal Research                       | 10.2112/JCOASTRES-D-15-00216.1 |
| 711 | Wang X; Liu Y; Ling F; Liu Y; Fang F          | 2017 | Spatiotemporal change detection of Ningbo coastline using Landsat timeseries images during 1976-2015                                                                | Coastline Change; Landsat; Ningbo; Normalized Difference Water Index; Spatio-Temporal Pattern     | 43 | ISPRS International Journal of Geo-Information    | 10.3390/ijgi6030068            |

|     |                                                                                     |      |                                                                                                                                    |                                                                                                                                                                                                     |    |                                                        |                                    |
|-----|-------------------------------------------------------------------------------------|------|------------------------------------------------------------------------------------------------------------------------------------|-----------------------------------------------------------------------------------------------------------------------------------------------------------------------------------------------------|----|--------------------------------------------------------|------------------------------------|
| 712 | Chen C; Maloof A                                                                    | 2017 | Revisiting the deformed high shoreline of lake Bonneville                                                                          | Great Basin; Isostasy; Lake Bonneville; Paleoclimatology; Paleoshorelines; Shorelines; Still Water Level                                                                                            | 11 | Quaternary Science Reviews                             | 10.1016/j.quascirev.2016.12.019    |
| 713 | Saputro G; Marschiavelli M; Ibrahim F; Maulana E                                    | 2017 | Identification of typology related to the coastal line changes in Bantul                                                           | NA                                                                                                                                                                                                  | 2  | IOP Conference Series: Earth and Environmental Science | 10.1088/1755-1315/54/1/012099      |
| 714 | Mondal I; Bandyopadhyay J; Dhara S                                                  | 2017 | Detecting shoreline changing trends using principle component analysis in Sagar island west Bengal, India                          | PCA; Sagar Island; Shoreline Changing Trends                                                                                                                                                        | 10 | Spatial Information Research                           | 10.1007/s41324-016-0076-0          |
| 715 | Safak I; List J; Warner J; Kumar N                                                  | 2017 | Observations and 3d hydrodynamicsbased modeling of decadal-scale shoreline change along the outer banks North Carolina             | Aerial Photography; Alongshore Transport; Coawst; Model Coupling; Modeling; Nc; NeaRShore Modeling; Outer Banks; Roms; Sediment Transport; Shoreline Change; Swan; Three-Dimensional; Wave Modeling | 5  | Coastal Engineering                                    | 10.1016/j.coastaleng.2016.11.014   |
| 716 | Belova N; Shabanova N; Ogorodov S; Kamalov A; Kuznetsov D; Baranskaya A; Novikova A | 2017 | Erosion of permafrost coasts of kara sea near Kharasavey Cape western Yamal                                                        | Coastal Dynamics; Ground Ice; Hydro-meteorological Forcing; Permafrost; Thermal Abrasion; Thermal Denudation; Western Yamal                                                                         | 16 | Earth's Cryosphere                                     | 10.21782/KZ1560-7496-2017-6(85-96) |
| 717 | Bryksina N; Fidaev D; Bryksin V; Zhegalina L; Eroshenko D                           | 2017 | Satellite remote sensing approaches and field measurements to tracking coastline changes of the Sambia Peninsula at the Baltic sea | Coastal Dynamics; Coastline; Exogenous Processes; Remote Methods                                                                                                                                    | 0  | Earsel Eproceedings                                    | 10.12760/01-2017-1-04              |

|     |                                                             |      |                                                                                                                                     |                                                                                                                         |   |                                                                                                                |                                |
|-----|-------------------------------------------------------------|------|-------------------------------------------------------------------------------------------------------------------------------------|-------------------------------------------------------------------------------------------------------------------------|---|----------------------------------------------------------------------------------------------------------------|--------------------------------|
| 718 | Garzelli A; Zoppetti C; Pinelli G                           | 2017 | Computational efficient unsupervised coastline detection from single-polarization 1-look SAR images of complex coastal environments | Coastal Environment; Shoreline Detection; Synthetic Aperture Radar (SAR)                                                | 3 | Proceedings of Spie - The International Society For Optical Engineering                                        | 10.1117/12.2278688             |
| 719 | Armenio E; De S F; Mossa M; Nobile B; Petrillo A            | 2017 | Investigation on coastline evolution using longterm observations and numerical modelling                                            | Beach Profile; GIS; LITPACK; Morphodynamics; Shoreline Modeling                                                         | 6 | Proceedings of The International off-shore and Polar Engineering Conference                                    | NA                             |
| 720 | Liu F; Wu T; Jiang G; Meng X; Tong L; Zhang Y; Suo A; Zhu L | 2017 | Dynamic response of the coastline and coastal landscape patterns to Hemeroby: A case study along the south coast of Yingkou         | Fractal Dimension; Hemeroby; Landscape Pattern Index; Shoreline Change                                                  | 6 | Shengtai Xuebao                                                                                                | 10.5846/stxb201609211902       |
| 721 | Sundaresh S; Murali R; Gaur A; Sri M                        | 2017 | Use of geospatial techniques in maritime archaeology with reference to the Tamil Nadu coast                                         | Archaeological Sites; Coastal Habitation; Geospatial Analysis; Satellite Imageries; Shoreline Changes                   | 0 | Current Science                                                                                                | 10.18520/cs/v113/i10/1891-1898 |
| 722 | Tomko-Králo D; Kapusta J; Bugár G; Sedlák A; Hreško J       | 2017 | Lake shoreline changes of the selected lakes in high tatra 1949-2015                                                                | Backfilling and Deposition of Mountain Lakes; Carpathians; High Tatra; Lake Shoreline; Retrospective Analysis; Slovakia | 0 | International Multidisciplinary Scientific Geoconference Surveying Geology and Mining Ecology Management, Sgem | 10.5593/sgem2017/23/S10.020    |
| 723 | Onuk N; Tezer A                                             | 2017 | Analyzing Istanbul coastline changes due to legal arrangements between 1852 and 2011                                                | Coastal Policy; Coastline Change; GIS; Istanbul; Moltke Map; Necip Bey Map                                              | 1 | Wit Transactions on The Built Environment                                                                      | 10.2495/CC170111               |



|     |                                                                   |      |                                                                                                                                                                                                                                    |                                                                                                                                           |    |                                                                                                                                                                         |                                          |
|-----|-------------------------------------------------------------------|------|------------------------------------------------------------------------------------------------------------------------------------------------------------------------------------------------------------------------------------|-------------------------------------------------------------------------------------------------------------------------------------------|----|-------------------------------------------------------------------------------------------------------------------------------------------------------------------------|------------------------------------------|
| 724 | Papakonstantinou A;<br>Topouzelis K; Doukari M                    | 2017 | UAS close range remote sensing<br>for mapping coastal environ-<br>ments                                                                                                                                                            | Coastal Management;<br>Marine Litter Map-<br>ping; UAS; UAV<br>Data Acquisition;<br>UAV-SFM                                               | 9  | Proceedings of<br>Spie - The Interna-<br>tional Society For<br>Optical Engineer-<br>ing                                                                                 | 10.1117/12.2278988                       |
| 725 | O'Rourke M                                                        | 2017 | Archaeological site vulnerability<br>modelling the influence of high<br>impact storm events on models<br>of shoreline erosion in the west-<br>ern Canadian Arctic                                                                  | (GIS); Archaeologi-<br>cal Site Management;<br>Coastal Erosion; Ge-<br>ographic Information<br>Systems; Vulnerabil-<br>ity Mapping        | 33 | Open Archaeology                                                                                                                                                        | 10.1515/opar-2017-0001                   |
| 726 | Zhan C; Yu J; Wang Q; Li<br>Y; Zhou D                             | 2017 | Spatial and temporal dynamics<br>of sandy coastal geomorphology<br>in the east of Laizhou Bay over<br>recent 60 years                                                                                                              | Anthropogenic Activ-<br>ities; Geomorphic<br>Evolution; Sandy<br>Coast; Shoreline;<br>Subaqueous Slope                                    | 1  | Haiyang Xuebao                                                                                                                                                          | 10.3969/j.issn.0253-<br>4193.2017.09.009 |
| 727 | Ruz M; Hequette A; Marin<br>D; Sipka V; Crapoulet A;<br>Cartier A | 2017 | Development of an incipient<br>foredune field along a prograd-<br>ing macrotidal shoreline north-<br>ern France formation dun champ<br>de dunes embryonnaires le long<br>dune côte macrotidale en accré-<br>tion nord de la France | Costal Dunes; Incipi-<br>ent Foredunes;<br>Northern France;<br>Shoreline Change                                                           | 8  | Geomorphologie:<br>Relief, Processus,<br>Environnement                                                                                                                  | 10.4000/geomorpholo-<br>gie.11638        |
| 728 | Pervez W; Khan S;<br>Hussain E; Amir F; Maud<br>M                 | 2017 | Multi sensor satellitebased<br>change detection analysis                                                                                                                                                                           | Hyper- Spectral; Im-<br>aging Sciences; Op-<br>erational Land Im-<br>ager; Remote Sens-<br>ing; Shoreline<br>Change Detection<br>Analysis | 0  | GISTam 2017 - Pro-<br>ceedings of The<br>3rd International<br>Conference on Ge-<br>ographical Informa-<br>tion Systems<br>Theory, Applica-<br>tions and Manage-<br>ment | NA                                       |

|     |                                                                   |      |                                                                                                                                                                                                                 |                                                                                                       |    |                                                               |                                      |
|-----|-------------------------------------------------------------------|------|-----------------------------------------------------------------------------------------------------------------------------------------------------------------------------------------------------------------|-------------------------------------------------------------------------------------------------------|----|---------------------------------------------------------------|--------------------------------------|
| 729 | Ossa M; Henao L; Selvaraj J                                       | 2017 | Detection of shoreline changes in the northern district of Buenaventura using remote sensing detección de cambios de la línea costera al norte del distrito de buenaventura mediante el uso de sensores remotos | Accretion; Buenaventura; Colombian Pacific; Erosion; Shoreline Changes                                | 1  | Boletin De Investigaciones Marinas Y Costeras                 | NA                                   |
| 730 | Mutaqin B                                                         | 2017 | Shoreline changes analysis in kuwaru coastal area Yogyakarta Indonesia an application of the digital shoreline analysis system DSAS                                                                             | Coastal; DSAS; Dynamics; GIS; Kuwaru; Processes; Shoreline; Yogyakarta                                | 17 | International Journal of Sustainable Development and Planning | 10.2495/SDP-V12-N7-1203-1214         |
| 731 | Masria A; Negm A; Iskander M                                      | 2017 | Assessment of Nile delta coastal zone using remote sensing                                                                                                                                                      | Change Detection; Image Classification; Remote Sensing; Rosetta; Shoreline                            | 1  | Handbook of Environmental Chemistry                           | 10.1007/698_2016_55                  |
| 732 | Chen W; Zhang D; Shi S; Zhou J; Kang M                            | 2017 | Research on monitoring coastline changes by remote sensing in muddy coast central Jiangsu coast                                                                                                                 | Coastline; Erosion and Deposition; Muddy Tidal Flat; Remote Sensing; Slope of Tidal Flat; Tide        | 1  | Haiyang Xuebao                                                | 10.3969/j.issn.0253-4193.2017.05.013 |
| 733 | Liu Q; Trinder J; Turner I                                        | 2017 | Automatic super-resolution shoreline change monitoring using Landsat archival data: A case study at Narrabeencollaroy beach, Australia                                                                          | Landsat; Shoreline Monitoring; Super-Resolution                                                       | 40 | Journal of Applied Remote Sensing                             | 10.1117/1.JRS.11.016036              |
| 734 | Ensign S; Currin C; Piehler M; Tobias C                           | 2017 | A method for using shoreline morphology to predict suspended sediment concentration in tidal creeks                                                                                                             | Estuarine Morphology; Salt MaRSh; Sea Level Rise; Shoreline Change; Suspended Sediment; Tidal Creek   | 9  | Geomorphology                                                 | 10.1016/j.geomorph.2016.09.036       |
| 735 | MuthUSAnkar G; Jonathan M; Lakshumanan C; Roy P; Srinivasa-Raju K | 2017 | Coastal erosion vs manmade protective structures evaluating a two-decade history from southeastern India                                                                                                        | Accretion; Erosion; GIS; Puducherry; Seawall; Shoreline Changes; Southeast Coast of India; Tamil Nadu | 4  | Natural Hazards                                               | 10.1007/s11069-016-2583-7            |

|      |                                                             |      |                                                                                                                                                                          |                                                                                                                                      |    |                                                                                |                                           |
|------|-------------------------------------------------------------|------|--------------------------------------------------------------------------------------------------------------------------------------------------------------------------|--------------------------------------------------------------------------------------------------------------------------------------|----|--------------------------------------------------------------------------------|-------------------------------------------|
| 1800 | Yan Y; Zhang Z; Wang C; Zhang L; Huang Y; Zhang J           | 2017 | Analysis of recent coastline evolution due to marine reclamation projects in the Qinzhou Bay                                                                             | Qinzhou Bay; Marine Reclamation; Remote Sensing; Geospatial Analysis; Coastline Evolution                                            | 5  | Polish Maritime Research                                                       | 10.1515/pomr-2017-0082                    |
| 1829 | Fraser C; Bernatchez P; Dugas S                             | 2017 | Development of a GIS coastal landuse planning tool for coastal erosion adaptation based on the exposure of buildings and infrastructure to coastal erosion Quebec Canada | Adaptation Tool; GIS Planning Tool; Coastal Erosion; Coastal Hazards; Exposure Assessment; Vulnerability; Knowledge Transfer Process | 15 | Geomatics Natural Hazards & Risk                                               | 10.1080/19475705.2017.1294114             |
| 1831 | Topouzelis K; Papa-konstantinou A; Doukari M                | 2017 | Coastline change detection using Unmanned Aerial Vehicles and image processing techniques                                                                                | UAV Data Acquisition; Coastal Management; Aerial Photo; Structure From Motion; Image Processing; 3d Visualization                    | 16 | Fresenius Environmental Bulletin                                               | NA                                        |
| 1834 | Ruz M; Hequette A; Marin D; Sipka V; Crapoulet A; Cartier A | 2017 | Development of an incipient foredune field along a prograding macrotidal shoreline northern France                                                                       | Costal Dunes; Incipient Foredunes; Shoreline Change; Northern France                                                                 | 9  | Geomorphologie-Relief Processus Environnement                                  | 10.4000/geomorphologie.11638              |
| 1839 | Onuk N; Tezer A                                             | 2017 | Analyzing Istanbul coastline changes due to legal arrangements between 1852 and 2011                                                                                     | Coastal Policy; Coastline Change; Moltke Map; Necip Bey Map; GIS; Istanbul                                                           | 1  | Coastal Cities and Their Sustainable Future II                                 | 10.2495/CC170111                          |
| 1840 | Pervez W; Khan S; Hussain E; Amir F; Maud M                 | 2017 | Evaluate the capability of Landsat-8 operational land imager for shoreline change detection/inland water studies                                                         | Change Detection Analysis; Satellite Image Processing; Remote Sensing; Imaging Sciences; Operational Land Imager                     | 1  | Geomatics & Restoration - Conservation of Cultural Heritage In The Digital Era | 10.5194/isprs-archives-XLII-5-W1-145-2017 |
| 2213 | Sunder S; Raaj R; Ramakrishnan B                            | 2017 | Intercomparison of remote sensing-based shoreline mapping techniques at different coastal stretches of India vol 189 pg 290 2017                                         | NA                                                                                                                                   | 1  | Environmental Monitoring and Assessment                                        | 10.1007/s10661-017-6046-8                 |

|     |                                                                                                                 |      |                                                                                                                      |                                                                                                                                                                      |    |                                                                                                           |                                |
|-----|-----------------------------------------------------------------------------------------------------------------|------|----------------------------------------------------------------------------------------------------------------------|----------------------------------------------------------------------------------------------------------------------------------------------------------------------|----|-----------------------------------------------------------------------------------------------------------|--------------------------------|
| 528 | Guo F; Hu T; Ying Y; Xiao J                                                                                     | 2018 | Analysis on the spatial and temporal change of the five islands in Dongtou district in the last 15 years             | Coastline Change; Dongtou Island; Landcover; Reclamation                                                                                                             | 0  | 5th International Workshop on Earth Observation and Remote Sensing Applications, Eorsa 2018 - Proceedings | 10.1109/EORSA.2018.8598625     |
| 529 | Dhiauddin R; Gemilang W                                                                                         | 2018 | Coastline alteration rate of Weh island Aceh province Indonesia                                                      | NA                                                                                                                                                                   | 1  | IOP Conference Series: Earth and Environmental Science                                                    | 10.1088/1755-1315/216/1/012010 |
| 530 | Medellín G; Torres-Freyermuth A; Tomasicchio G; Francone A; Tereszkiewicz P; Lusito L; Palemón-Arcos L; López J | 2018 | Field and numerical study of resistance and resilience on a sea breeze dominated beach in Yucatan, Mexico            | Beach Resilience; Beach Resistance; GSB Model; Resilience Index; Sea Breezes; Temporary Groin; Yucatan Peninsula                                                     | 17 | Water (Switzerland)                                                                                       | 10.3390/w10121806              |
| 531 | Spagnoli J; Minghelli A; Charmasson S                                                                           | 2018 | Shoreline monitoring using WorldView-2 images along the coast of Sendai after the Tohoku tsunami in presence of Foam | Classification; Foam; Fukushima-Daiichi Nuclear Power Plant (FDNPP); High Resolution Satellite Images; Multispectral; Remote Sensing; Sendai; Shoreline; Worldview-2 | 0  | 2018 Oceans - MTS/IEEE Kobe Techno-Oceans, Oceans - Kobe 2018                                             | 10.1109/OCEANSKOB.2018.8559069 |
| 532 | Appeaning A K; Jayson-Quashigah P; Codjoe S; Martey F                                                           | 2018 | Drone as a tool for coastal flood monitoring in the Volta delta Ghana                                                | Coastal Erosion; Coastal Monitoring; Drone; Flooding; Unmanned Aerial Vehicle (UAV); Volta Delta                                                                     | 18 | Geoenvironmental Disasters                                                                                | 10.1186/s40677-018-0108-2      |

|     |                                                                                                                        |      |                                                                                                              |                                                                                                                              |     |                                                                       |                              |
|-----|------------------------------------------------------------------------------------------------------------------------|------|--------------------------------------------------------------------------------------------------------------|------------------------------------------------------------------------------------------------------------------------------|-----|-----------------------------------------------------------------------|------------------------------|
| 533 | San B; UIUSAR U                                                                                                        | 2018 | An approach for prediction of shoreline with spatial uncertainty mapping SLIP-SUM                            | Antalya; Shoreline Prediction; Slip; Snake Algorithm; Spatial Uncertainty Mapping; SUM                                       | 7   | International Journal of Applied Earth Observation and Geoinformation | 10.1016/j.jag.2018.08.005    |
| 534 | Sytnik O; Del R L; Greggio N; Bonetti J                                                                                | 2018 | Historical shoreline trend analysis and drivers of coastal change along the Ravenna coast NE Adriatic        | Accretion; Coastal Erosion; DSAS; Retreat; Spatial Analysis                                                                  | 15  | Environmental Earth Sciences                                          | 10.1007/s12665-018-7963-8    |
| 535 | Awange J; Saleem A; Konneh S; Goncalves R; Kiema J; Hu K                                                               | 2018 | Liberia's coastal erosion vulnerability and LULC change analysis post-civil war and Ebola epidemic           | Coastal Vulnerability; Erosion; Landsat; Liberia; Lulc Changes; Sentinel-2; Supervised Classification                        | 8   | Applied Geography                                                     | 10.1016/j.apgeog.2018.10.007 |
| 536 | Abu Z A; Soliman M; Yassin A                                                                                           | 2018 | Evaluation of using satellite image in detecting long term shoreline change along Elarish coastal zone Egypt | Automaton Shoreline; Coastal Structures; El-Arish Long Term Shoreline Change; Extraction; Landsat Images; Remote Sensing     | 9   | Alexandria Engineering Journal                                        | 10.1016/j.aej.2017.10.005    |
| 537 | Bui V; Fan D; Nguyen D; Tran D; Tran D; Hoang V; Nguyen T                                                              | 2018 | Morphological change in the northern Red river delta Vietnam                                                 | Coastal Engineering; Coastal Erosion; Coastal Management; Dem; Morphological Change; Red River Delta; Tide-Dominated         | 5   | Journal of Ocean University of China                                  | 10.1007/s11802-018-3777-2    |
| 538 | Pourkerman M; Marriner N; Morhange C; Djamali M; Amjadi S; Lahijani H; Beni A; Vacchi M; Tofighian H; Shah-Hoesseini M | 2018 | Tracking shoreline erosion of at risk coastal archaeology the example of ancient Siraf Iran Persian Gulf     | Coasts; Erosion; Geography; GIS; Heritage Management; Iran; Persian Gulf; Protection; Remote Sensing; Waterfront Archaeology | 15  | Applied Geography                                                     | 10.1016/j.apgeog.2018.10.008 |
| 539 | Mentaschi L; Vousdoukas M; Pekel J; Voukouvalas E; Feyen L                                                             | 2018 | Global longterm observations of coastal erosion and accretion                                                | NA                                                                                                                           | 171 | Scientific Reports                                                    | 10.1038/s41598-018-30904-w   |

|     |                                                                                                      |      |                                                                                                          |                                                                                                                         |     |                                                                                |                                    |
|-----|------------------------------------------------------------------------------------------------------|------|----------------------------------------------------------------------------------------------------------|-------------------------------------------------------------------------------------------------------------------------|-----|--------------------------------------------------------------------------------|------------------------------------|
| 540 | Polk M; Eulie D                                                                                      | 2018 | Effectiveness of living shorelines as an erosion control method in North Carolina                        | Coastal Management; Geographic Information Systems (GIS); Living Shoreline; Shoreline Change Rate; Shoreline Protection | 7   | Estuaries and Coasts                                                           | 10.1007/s12237-018-0439-y          |
| 541 | Luijendijk A; Hagenaaars G; Ranasinghe R; Baart F; Donchyts G; Aarninkhof S                          | 2018 | The state of the worlds beaches                                                                          | NA                                                                                                                      | 329 | Scientific Reports                                                             | 10.1038/s41598-018-24630-6         |
| 542 | NasSAR K; Fath H; Mahmod W; Masria A; Nadaoka K; Negm A                                              | 2018 | Automatic detection of shoreline change case of north Sinai coast Egypt                                  | DSAS; North Sinai Coast; Remote Sensing and GIS; Satellite Imagery; Shoreline Change; Shoreline Prediction              | 15  | Journal of Coastal Conservation                                                | 10.1007/s11852-018-0613-1          |
| 543 | SARavanan S; ParthaSARathy K; Vishnuprasath S                                                        | 2018 | Monitoring spatial and temporal scales of shoreline changes in the Cuddalore region, India               | Accretion; Erosion; GIS; Image Processing; Shoreline Change                                                             | 5   | Coastal Zone Management: Global Perspectives, Regional Processes, Local Issues | 10.1016/B978-0-12-814350-6.00004-5 |
| 544 | Warnasuriya T; Gunaalan K; Gunasekara S                                                              | 2018 | Google earth a new resource for shoreline change estimation: case study from Jaffna peninsula Sri Lanka  | DSAS; GIS; Google Earth Platform; Remote Sensing; Shoreline Change                                                      | 8   | Marine Geodesy                                                                 | 10.1080/01490419.2018.1509160      |
| 545 | Pradhan B; Rizeei H; Abdulle A                                                                       | 2018 | Quantitative assessment for detection and monitoring of coastline dynamics with temporal Radarsat images | Coastline; Radarsat; Remote Sensing; SAR; Support Vector Machine                                                        | 5   | Remote Sensing                                                                 | 10.3390/rs10111705                 |
| 546 | Li J; Pu R; Yuan Q; Liu Y; Feng B; Guo Q; Jiang Y; Ye M                                              | 2018 | Spatiotemporal change patterns of coastlines in Xiangshan harbor Zhejiang China during the past 40 years | Tidal Inlet                                                                                                             | 3   | Journal of Coastal Research                                                    | 10.2112/JCOASTRES-D-17-00150.1     |
| 547 | Young A; Flick R; Gallien T; Giddings S; Guza R; Harvey M; Lenain L; Ludka B; Melville W; O'Reilly W | 2018 | Southern California coastal response to the 2015-2016 El Niño                                            | Beach; Cliff; Coastal; ENSO; Erosion; Estuary                                                                           | 9   | Journal of Geophysical Research: Earth Surface                                 | 10.1029/2018JF004771               |

|     |                                                                                                                                                                                                                                                                           |      |                                                                                                                                  |                                                                                             |    |                                                 |                              |
|-----|---------------------------------------------------------------------------------------------------------------------------------------------------------------------------------------------------------------------------------------------------------------------------|------|----------------------------------------------------------------------------------------------------------------------------------|---------------------------------------------------------------------------------------------|----|-------------------------------------------------|------------------------------|
| 548 | Rani M; Rehman S; Sajjad H; Chaudhary B; Sharma J; Bhardwaj S; Kumar P                                                                                                                                                                                                    | 2018 | Assessing coastal landscape vulnerability using geospatial techniques along Vizianagaramsrkakulam coast of Andhra Pradesh, India | Coastal Vulnerability Index; Erosion and Accretion; Geospatial Techniques; Shoreline Change | 11 | Natural Hazards                                 | 10.1007/s11069-018-3414-9    |
| 549 | Jones B; Farquharson L; Baughman C; Buzard R; Arp C; Grosse G; Bull D; Günther F; Nitze I; Urban F; Kasper J; Frederick J; Thomas M; Jones C; Mota A; Dallimore S; Tweedie C; Maio C; Mann D; Richmond B; Gibbs A; Xiao M; Sachs T; Iwahana G; Kannevskiy M; Romanovsky V | 2018 | A decade of remotely sensed observations highlight complex processes linked to coastal permafrost bluff erosion in the Arctic    | Arctic Coastal Erosion; Arctic System; Ice-Rich Permafrost; Remote Sensing Change Detection | 40 | Environmental Research Letters                  | 10.1088/1748-9326/aae471     |
| 550 | Roy S; Mahapatra M; Chakraborty A                                                                                                                                                                                                                                         | 2018 | Shoreline change detection along the coast of Odisha India using digital shoreline analysis system                               | DSAS; HWL; MNDWI; Odisha Coast; Shoreline                                                   | 9  | Spatial Information Research                    | 10.1007/s41324-018-0199-6    |
| 551 | Noujas V; Thomas K                                                                                                                                                                                                                                                        | 2018 | Estimation of longshore sediment transport direction from varying coastal morphodynamics due to shore structures                 | Beach; Breakwater; Harbour; Sediment Transport; Shoreline                                   | 1  | Environmental Earth Sciences                    | 10.1007/s12665-018-7853-0    |
| 552 | Baral R; Pradhan S; Samal R; Mishra S                                                                                                                                                                                                                                     | 2018 | Shoreline change analysis at Chilika lagoon coast India using digital shoreline analysis system                                  | Chilika Lagoon; DSAS; Shoreline Change                                                      | 15 | Journal of The Indian Society of Remote Sensing | 10.1007/s12524-018-0818-7    |
| 553 | Rajasree B; Deo M                                                                                                                                                                                                                                                         | 2018 | Evaluation of estuary shoreline shift in response to climate change: A study from the central west coast of India                | Climate Change; Neural Network; Numerical Model; Sediment Transport; Shoreline Change       | 9  | Land Degradation and Development                | 10.1002/ldr.3074             |
| 554 | Farquharson L; Mann D; Swanson D; Jones B; Buzard R; Jordan J                                                                                                                                                                                                             | 2018 | Temporal and spatial variability in coastline response to declining seaice in northwest Alaska                                   | Arctic; Coastal Erosion; Permafrost; Remote Sensing; Sea-Ice                                | 28 | Marine Geology                                  | 10.1016/j.margeo.2018.07.007 |

|     |                                                                                    |      |                                                                                                                                                                    |                                                                                                                                                        |    |                                  |                                 |
|-----|------------------------------------------------------------------------------------|------|--------------------------------------------------------------------------------------------------------------------------------------------------------------------|--------------------------------------------------------------------------------------------------------------------------------------------------------|----|----------------------------------|---------------------------------|
| 555 | Rader A; Pickart A; Walker I; Hesp P; Bauer B                                      | 2018 | Foredune morphodynamics and sediment budgets at seasonal to decadal scales Humboldt Bay national wildlife refuge California USA                                    | Aeolian; Coastal Erosion; Fore-dune; Shoreline Change                                                                                                  | 15 | Geomorphology                    | 10.1016/j.geomorph.2018.06.003  |
| 556 | Esposito G; Salvini R; Matano F; Sacchi M; Troise C                                | 2018 | Evaluation of geomorphic changes and retreat rates of a coastal pyroclastic cliff in the Campi Flegrei volcanic district southern Italy                            | Aerial Photogrammetry; Campi Flegrei; Coastal Cliff; Geomorphic Change Detection; LIDAR; Retreat Rate                                                  | 13 | Journal of Coastal Conservation  | 10.1007/s11852-018-0621-1       |
| 557 | Mukhopadhyay A; Ghosh P; Chanda A; Ghosh A; Ghosh S; Das S; Ghosh T; Hazra S       | 2018 | Threats to coastal communities of Mahanadi delta due to imminent consequences of erosion present and near future                                                   | Coastal Communities; Coastal Erosion; DSAS; EPR; LRR; Mahanadi Delta                                                                                   | 19 | Science of The total Environment | 10.1016/j.scitotenv.2018.05.076 |
| 558 | Alberico I; Cavuoto G; Di F V; Punzo M; Tarallo D; Pelosi N; Ferraro L; Marsella E | 2018 | Historical maps and satellite images as tools for shoreline variations and territorial changes assessment: the case study of volturno coastal plain southern Italy | Coastal Management; Coastal Trend; Historical Analysis; Natural Hazards; Natural Landscape                                                             | 7  | Journal of Coastal Conservation  | 10.1007/s11852-017-0573-x       |
| 559 | Roskopf C; Di P G; Atkinson D; Rodríguez G; Walker I                               | 2018 | Recent shoreline evolution and beach erosion along the central Adriatic coast of Italy: the case of Molise region                                                  | Adriatic Sea; Climatic Variability; Multi-Temporal GIS Analysis; River Channel Adjustments; Shoreline Protection; Short To Long-Term Shoreline Changes | 19 | Journal of Coastal Conservation  | 10.1007/s11852-017-0550-4       |
| 560 | Kaamin M; Daud M; Sanik M; Ahmad N; Mokhtar M; Ngadiman N; Yahya F                 | 2018 | Mapping shoreline position using Unmanned Aerial Vehicle                                                                                                           | NA                                                                                                                                                     | 2  | Aip Conference Proceedings       | 10.1063/1.5055465               |
| 561 | Aryastana P; Ardantha I; Candrayana K                                              | 2018 | Coastline change analysis and erosion prediction using satellite images                                                                                            | NA                                                                                                                                                     | 3  | Matec Web of Conferences         | 10.1051/matec-conf/201819713003 |
| 562 | Templin T; Popielarczyk D; Kosecki R                                               | 2018 | Application of low-cost fixed-wing UAV for inland lakes shoreline investigation                                                                                    | Bathymetry; Dem; Gns; Lake Suskie; Morphometry; UAV                                                                                                    | 25 | Pure and Applied Geophysics      | 10.1007/s00024-017-1707-7       |



|     |                                                                                                   |      |                                                                                                                                                |                                                                                                                               |    |                                                        |                                |
|-----|---------------------------------------------------------------------------------------------------|------|------------------------------------------------------------------------------------------------------------------------------------------------|-------------------------------------------------------------------------------------------------------------------------------|----|--------------------------------------------------------|--------------------------------|
| 563 | Novikova A; Belova N; Baranskaya A; Aleksyutina D; Maslakov A; Zelenin E; Shabanova N; Ogorodov S | 2018 | Dynamics of permafrost coasts of Baydaratskaya Bay kara sea based on multitemporal remote sensing data                                         | Baydaratskaya Bay; Coastal Erosion; Permafrost; Remote Sensing                                                                | 24 | Remote Sensing                                         | 10.3390/rs10091481             |
| 564 | Kostecki R                                                                                        | 2018 | Application of the spatial database for shoreline change analysis and visualisation: example from the western polish coast southern Baltic sea | Open Source GIS Software; PostGIS; Postgresql; Shoreline Change Analysis; Spatial Database                                    | 1  | Quaestiones Geographicae                               | 10.2478/quageo-2018-0023       |
| 565 | Conery I; Walsh J; Reide C D                                                                      | 2018 | Hurricane overwash and decadal-scale evolution of a narrowing barrier island Ocracoke island NC                                                | Barrier Island; Overwash; Paleotempestology; Remote Sensing; Shoreline Mapping                                                | 5  | Estuaries and Coasts                                   | 10.1007/s12237-018-0374-y      |
| 566 | Suhendra S; Amron A; Hilmi E                                                                      | 2018 | The pattern of coastline change based on the characteristics of sediment and coastal slope in Pangenan coast of Cirebon west Java              | NA                                                                                                                            | 7  | E3S Web of Conferences                                 | 10.1051/E3Sconf/20184706001    |
| 567 | Suhaimi H; Jamal M; Ahmad A                                                                       | 2018 | Assessment of river bank erosion at Kilim river Langkawi using geospatial technique                                                            | NA                                                                                                                            | 7  | IOP Conference Series: Earth and Environmental Science | 10.1088/1755-1315/169/1/012012 |
| 568 | Gray P; Ridge J; Poulin S; Seymour A; Schwantes A; Swenson J; Johnston D                          | 2018 | Integrating drone imagery into high resolution satellite remote sensing assessments of estuarine environments                                  | Change Detection; Drones; Estuarine; Habitat Mapping; LIDAR; NERR; Rapideye;Worldview-3; Unoccupied Aircraft Systems; Wetland | 41 | Remote Sensing                                         | 10.3390/rs10081257             |
| 569 | Catal R H; Bayram B; Bozkurt S; Ince A; Demir N; Seker D                                          | 2018 | An extended approach of particle swarm optimization for shoreline extraction from RA-SAT imagery                                               | Image Processing; Particle Swarm Optimization; Shoreline Extraction; Simple Linear Clustering                                 | 3  | Journal of The Indian Society of Remote Sensing        | 10.1007/s12524-018-0804-0      |

|     |                                                                                  |      |                                                                                                                                                                                  |                                                                                           |    |                                                                                                       |                                |
|-----|----------------------------------------------------------------------------------|------|----------------------------------------------------------------------------------------------------------------------------------------------------------------------------------|-------------------------------------------------------------------------------------------|----|-------------------------------------------------------------------------------------------------------|--------------------------------|
| 570 | Xu N; Gong P                                                                     | 2018 | Significant coastline changes in China during 1991-2015 tracked by Landsat data                                                                                                  | NA                                                                                        | 25 | Science Bulletin                                                                                      | 10.1016/j.scib.2018.05.032     |
| 571 | Bidorn B; Rukvichai C                                                            | 2018 | Impacts of coastal development on the shoreline change of the eastern Gulf of Thailand                                                                                           | NA                                                                                        | 4  | IOP Conference Series: Earth and Environmental Science                                                | 10.1088/1755-1315/171/1/012007 |
| 572 | Mahamud U; Takewaka S                                                            | 2018 | Shoreline change around a river delta on the Cox's Bazar coast of Bangladesh                                                                                                     | Cox's Bazar; Delta; Numerical Computation; Sediment Transport; Spit; Wave                 | 4  | Journal of Marine Science and Engineering                                                             | 10.3390/jmse6030080            |
| 573 | SoUSA W; Souto M; Matos S; Duarte C; Salgueiro A; Neto C                         | 2018 | Creation of a coastal evolution prognostic model using shoreline historical data and techniques of digital image processing in a GIS environment for generating future scenarios | NA                                                                                        | 8  | International Journal of Remote Sensing                                                               | 10.1080/01431161.2018.1455240  |
| 574 | Duarte C; De M F; Landau L; Souto M; Sabadia J; Neto C; Rodrigues L; Damasceno A | 2018 | Short-time analysis of shoreline based on RapidEye satellite images in the terminal area of Pecém port Ceará, Brazil                                                             | NA                                                                                        | 8  | International Journal of Remote Sensing                                                               | 10.1080/01431161.2018.1457229  |
| 575 | Chen W; Zhang D; Cui D; Lv L; Xie W; Shi S; Hou Z                                | 2018 | Monitoring spatial and temporal changes in the continental coastline and the intertidal zone in Jiangsu province, China                                                          | Coastline; Intertidal Zone; Jiangsu Province; Remote Sensing; Spatial and Temporal Change | 7  | Dili Xuebao/Acta Geographica Sinica                                                                   | 10.11821/dlxb201807014         |
| 576 | Tereszkiewicz P; McKinney N; Meyer-Arendt K                                      | 2018 | Groins along the northern Yucatán coast                                                                                                                                          | Coastal Management; Erosion; Shoreline Protection                                         | 6  | Journal of Coastal Research                                                                           | 10.2112/JCOASTRES-D-17-00062.1 |
| 577 | Manjulavani K; Supriya V; Suhrullekha M; Harish B                                | 2018 | Detection of shoreline change using geospatial techniques along the coast between Kanyakumari and Tuticorin                                                                      | EPR; LRR; NSM; SCE; Shoreline                                                             | 2  | IEEE International Conference on Power, Control, Signals and Instrumentation Engineering, ICPCSI 2017 | 10.1109/ICPCSI.2017.8392235    |

|     |                                                                    |      |                                                                                                                                                                   |                                                                                                                            |    |                                                                       |                                   |
|-----|--------------------------------------------------------------------|------|-------------------------------------------------------------------------------------------------------------------------------------------------------------------|----------------------------------------------------------------------------------------------------------------------------|----|-----------------------------------------------------------------------|-----------------------------------|
| 578 | Behling R; Milewski R; Chabrillat S                                | 2018 | Spatiotemporal shoreline dynamics of Namibian coastal lagoons derived by a dense remote sensing time series approach                                              | Coastal Lagoons; Remote Sensing; Shoreline; Spatiotemporal Dynamics; Time Series                                           | 12 | International Journal of Applied Earth Observation and Geoinformation | 10.1016/j.jag.2018.01.009         |
| 579 | Ayyappan K; Thiruvengatasamy K                                     | 2018 | On the hydrodynamics of shoreline morphological changes and its impact on tidal stability in the presence of groins using field measurements at Muttukadu estuary | Field Measurements; Groin System; Hydrodynamics; Morphological Changes; Sediment Transport                                 | 1  | International Journal of Civil Engineering and Technology             | NA                                |
| 580 | Qiao G; Mi H; Wang W; Tong X; Li Z; Li T; Liu S; Hong Y            | 2018 | 55year 1960-2015 spatiotemporal shoreline change analysis using historical Disp and Landsat time series data in Shanghai                                          | Disp; Image Series; Landsat; Shanghai; Spatiotemporal Shoreline Change                                                     | 36 | International Journal of Applied Earth Observation and Geoinformation | 10.1016/j.jag.2018.02.009         |
| 581 | Chang Y; Chu K; Chuang L                                           | 2018 | Sustainable coastal zone planning based on historical coastline changes: A model from case study in Tainan, Taiwan                                                | Coastal Management; Erosion; Lagoon; Satellite Imagery; Taiwan                                                             | 17 | Landscape and Urban Planning                                          | 10.1016/j.landurbplan.2018.02.012 |
| 582 | Zhang X; Zhang Y; Zhu L; Chi W; Yang Z; Wang B; Lv K; Wang H; Lu Z | 2018 | Spatialtemporal evolution of the eastern Nanhui mudflat in the Changjiang Yangtze river estuary under intensified human activities                                | Estuary Morphology; Land Reclamation; Riverine Sediment Discharge; Turbidity Maximum Zone; Vegetation; Yangtze River Coast | 20 | Geomorphology                                                         | 10.1016/j.geomorph.2018.02.023    |
| 583 | Sugianto S; Heriansyah H; Darusman D; Rusdi M; Karim A             | 2018 | Shoreline change after 12 years of tsunami in Banda Aceh Indonesia a multiresolution multitemporal satellite data and GIS approach                                | NA                                                                                                                         | 2  | IOP Conference Series: Earth and Environmental Science                | 10.1088/1755-1315/144/1/012053    |

|     |                                                                      |      |                                                                                                                                                           |                                                                                                                                              |    |                                                                                                  |                               |
|-----|----------------------------------------------------------------------|------|-----------------------------------------------------------------------------------------------------------------------------------------------------------|----------------------------------------------------------------------------------------------------------------------------------------------|----|--------------------------------------------------------------------------------------------------|-------------------------------|
| 584 | Dharma I; Arymurthy A                                                | 2018 | Shoreline change detection based on multispectral images using 2D principal component analysis of band images and histogram of oriented gradient features | 2dpca-Svm; Classification; Feature Extraction; Hog; Multispectral Image; Shoreline                                                           | 0  | 2017 International Conference on Advanced Computer Science and Information Systems, Icacsis 2017 | 10.1109/ICAC-SIS.2017.8355052 |
| 585 | Dang Y; Zhang C; Zhou X; Xu J; Xue S                                 | 2018 | Instantaneous shorelines as an intermediate for island shoreline mapping based on aerial satellite stereo images                                          | Instantaneous Shoreline; Island Mapping; Shoreline Mapping; Tide Model; Tide-Coordinated Shoreline                                           | 4  | Marine Geodesy                                                                                   | 10.1080/01490419.2017.1397067 |
| 586 | Cenci L; Disperati L; Persichillo M; Oliveira E; Alves F; Phillips M | 2018 | Integrating remote sensing and GIS techniques for monitoring and modeling shoreline evolution to support coastal risk management                          | Coastal Risk Management; GIS; Remote Sensing; Shoreline Mapping and Evolution Modeling; Time-Series Analysis and Multi-Temporal Analysis     | 26 | GIScience and Remote Sensing                                                                     | 10.1080/15481603.2017.1376370 |
| 587 | HisaBayashi M; Rogan J; Elmes A                                      | 2018 | Quantifying shoreline change in Funafuti Atoll Tuvalu using a time series of Quick-Bird, WorldView and Landsat data                                       | Decision Tree Classification; Landsat; Quickbird; Segmentation; Shoreline Change; Worldview                                                  | 7  | GIScience and Remote Sensing                                                                     | 10.1080/15481603.2017.1367157 |
| 588 | Yao Q; Liu K; Ryu J                                                  | 2018 | Multiproxy characterization of hurricanes Rita and Ike storm deposits in the Rockefeller wildlife refuge southwestern Louisiana                           | Coastal Erosion; Hurricane Ike; Hurricane Rita; Louisiana; Paleotempestology; Rockefeller Wildlife Refuge; Shoreline Retreat; Storm Deposits | 14 | Journal of Coastal Research                                                                      | 10.2112/SI85-169.1            |

|     |                                                           |      |                                                                                                                                                             |                                                                              |   |                                                                                                                |                                         |
|-----|-----------------------------------------------------------|------|-------------------------------------------------------------------------------------------------------------------------------------------------------------|------------------------------------------------------------------------------|---|----------------------------------------------------------------------------------------------------------------|-----------------------------------------|
| 589 | Jun K; Jun B; Lee H; Kim S; Tak W                         | 2018 | The study of utilization and precision based on the comparison and analysis of drone-based coastal hazard data and its application in the ocean environment | Coastal Hazard; Drone; Erosion; Seashore Disaster; Topographic Change        | 3 | Journal of Coastal Research                                                                                    | 10.2112/SI85-163.1                      |
| 590 | Collin A; Duvat V; Pillet V; Salvat B; James D            | 2018 | Understanding interactions between shoreline changes and reef outer slope morphometry on Takapoto Atoll French Polynesia                                    | Multi-Decade; Satellite-Derived Bathymetry; Shoreline Change; Takapoto Atoll | 6 | Journal of Coastal Research                                                                                    | 10.2112/SI85-100.1                      |
| 591 | Albuquerque M; Leal A D; Espinoza J; Oliveira U; Simões R | 2018 | Determining shoreline response to meteoceanographic events using remote sensing and Unmanned Aerial Vehicle UAV: Case study in southern Brazil              | Coastal Erosion; Coastal Management; Extreme Events; Geotechnologies         | 7 | Journal of Coastal Research                                                                                    | 10.2112/SI85-154.1                      |
| 592 | Kim C; Kim H; Park C; Kim W; Lee M; Choi S; Do J          | 2018 | Coastline change measurement using shipborne mobile Lidar in Anmok beach Gangneung, Korea                                                                   | Coastal Erosion; Coastline; Mobile LiDAR; Monitoring; Wave Data              | 1 | Journal of Coastal Research                                                                                    | 10.2112/SI85-121.1                      |
| 593 | Tanaka H; Van D; Mitobe Y; Viet N                         | 2018 | Theory for erosion wave propagation in Cua Dai beach, Vietnam                                                                                               | Beach Erosion; Cua Dai River Mouth; Satellite Image Analysis                 | 0 | Journal of Coastal Research                                                                                    | 10.2112/SI85-125.1                      |
| 594 | Tojo K; Udo K                                             | 2018 | Analysis of beach recovery after the 2011 Tohoku earthquake tsunami based on shoreline extraction by Isodata                                                | Beach Erosion; Beach Recovery; Complex Shoreline; Isodata; Tsunami           | 1 | Journal of Coastal Research                                                                                    | 10.2112/SI85-035.1                      |
| 595 | Mohd F; Maulud K; Begum R; Selamat S; Karim O             | 2018 | Impact of shoreline changes to Pahang coastal area by using geospatial technology                                                                           | Accretion; Coastal Changes; Erosion; Geospatial; Vulnerability               | 7 | Sains Malaysiana                                                                                               | 10.17576/jsm-2018-4705-14               |
| 596 | Zhu H; Xing B; Ni S; Pan W                                | 2018 | Study on the coastline change of Jiaozhou Bay based on high resolution remote sensing image                                                                 | Coastline; Decrease; Increase; Jiaozhou Bay; Rate                            | 1 | International Archives of The Photogrammetry, Remote Sensing and Spatial Information Sciences - ISPRS Archives | 10.5194/isprs-archives-XLII-3-2591-2018 |

|     |                                                                             |      |                                                                                                                                                                                     |                                                                                                                                                                                         |    |                                                                       |                                 |
|-----|-----------------------------------------------------------------------------|------|-------------------------------------------------------------------------------------------------------------------------------------------------------------------------------------|-----------------------------------------------------------------------------------------------------------------------------------------------------------------------------------------|----|-----------------------------------------------------------------------|---------------------------------|
| 597 | Hzami A; Amrouni O;<br>Romanescu G; Stoleriu C;<br>Mihu-Pintilie A; Saâdi A | 2018 | Satellite images survey for the identification of the coastal sedimentary system changes and associated vulnerability along the western Bay of the Gulf of Tunis Northern Africa    | NA                                                                                                                                                                                      | 1  | Proceedings of The International Association of Hydrological Sciences | 10.5194/piahs-377-83-2018       |
| 598 | Stanchev H; Stancheva M;<br>Young R; Palazov A                              | 2018 | Analysis of shoreline changes and cliff retreat to support marine spatial planning in Shabla municipality northeast Bulgaria                                                        | Bulgarian Coast;<br>Coastal Erosion;<br>Land-Sea Interactions;<br>Marine Spatial Planning;<br>Sand Beaches                                                                              | 19 | Ocean and Coastal Management                                          | 10.1016/j.ocecoaman.2017.06.011 |
| 599 | Irrgang A; Lantuit H; Manson G; Günther F; Grosse G; Overduin P             | 2018 | Variability in rates of coastal change along the Yukon coast 1951 to 2015                                                                                                           | Arctic Coastal Dynamics;<br>Beaufort Coast;<br>DSAS Analysis;<br>Permafrost;<br>Shoreline Change                                                                                        | 32 | Journal of Geophysical Research: Earth Surface                        | 10.1002/2017JF004326            |
| 600 | Usmanov B; Nicu I; Gai-nullin I; Khomyakov P                                | 2018 | Monitoring and assessing the destruction of archaeological sites from Kuibyshev reservoir coastline Tatarstan Republic Russian federation: A case study                             | 3d Coastal Modelling;<br>Coastal Erosion;<br>Cultural Heritage;<br>GIS;<br>Volga                                                                                                        | 18 | Journal of Coastal Conservation                                       | 10.1007/s11852-017-0590-9       |
| 601 | Xu N                                                                        | 2018 | Detecting coastline change with all available Landsat data over 1986-2015: A case study for the state of Texas, USA                                                                 | Beach;<br>Coastline Change;<br>Hurricane;<br>Remote Sensing;<br>Sea Level;<br>State of Texas                                                                                            | 40 | Atmosphere                                                            | 10.3390/atmos9030107            |
| 602 | Wu D; Xu H                                                                  | 2018 | An ecological land cover sampling reclassification model for safety estimation of shoreline systems from a flood defense perspective using optical satellite remote sensing imaging | Ecological Knowledge-Oriented Reclassification;<br>Edge Feature Enhancement;<br>Land Cover Sampling;<br>Optical Satellite RS Data;<br>Shore Line Identification;<br>Shoreline Structure | 1  | Water (Switzerland)                                                   | 10.3390/w10030285               |

|     |                                                      |      |                                                                                                                                        |                                                                                                                                                                      |    |                                                                                                                |                                           |
|-----|------------------------------------------------------|------|----------------------------------------------------------------------------------------------------------------------------------------|----------------------------------------------------------------------------------------------------------------------------------------------------------------------|----|----------------------------------------------------------------------------------------------------------------|-------------------------------------------|
| 603 | Bouchahma M; Barhoumi W; Yan W; Wardi H              | 2018 | Optical-flow-based approach for the detection of shoreline changes using remote sensing data                                           | Coastal Changes; DSCF; Lka2c; Lukas-Kanade; Optical Flow; Surf                                                                                                       | 3  | Proceedings of IEEE/ACS International Conference on Computer Systems and Applications, AICCSA                  | 10.1109/AICCSA.2017.173                   |
| 604 | Diep N; Loi N; Can N                                 | 2018 | Monitoring erosion and accretion situation in the coastal zone at kien giang province                                                  | Erosion/Accretion; Kien Giang Province; Normalized Difference Water Index (NDWI); Shoreline                                                                          | 0  | International Archives of The Photogrammetry, Remote Sensing and Spatial Information Sciences - ISPRS Archives | 10.5194/isprs-archives-XLII-3-W4-197-2018 |
| 605 | Sankar R; Donoghue J; Kish S                         | 2018 | Spatiotemporal analysis of decadal-scale patterns in barrier island response to storms Perdido key NW Florida                          | Barrier Islands; Coastal Morphology; Erosion; Shoreline Change; Storms                                                                                               | 3  | Physical Geography                                                                                             | 10.1080/02723646.2017.1378959             |
| 606 | Hagenaars G; De V S; Luijendijk A; De B W; Reniers A | 2018 | On the accuracy of automated shoreline detection derived from satellite imagery: a case study of the sand motor mega-scale nourishment | Automated Shoreline Detection; Coastal Management; Coastline Trends; Dutch Coast; ESA; Google Earth Engine; Nasa; Positional Accuracy; Sand Motor; Satellite Imagery | 59 | Coastal Engineering                                                                                            | 10.1016/j.coastaleng.2017.12.011          |
| 607 | Niculescu D; Rusu E                                  | 2018 | Evaluation of the new coastal protection scheme at Mamaia Bay in the nearshore of the Black sea                                        | Black Sea; Coastal Protection; Marine Environment; Shoreline Changes; Wave Regime                                                                                    | 2  | Ocean Systems Engineering                                                                                      | 10.12989/ose.2018.8.1.001                 |

|     |                                                                                                                            |      |                                                                                                                                                                                                                                                                                                    |                                                                                                                                        |    |                                                |                                |
|-----|----------------------------------------------------------------------------------------------------------------------------|------|----------------------------------------------------------------------------------------------------------------------------------------------------------------------------------------------------------------------------------------------------------------------------------------------------|----------------------------------------------------------------------------------------------------------------------------------------|----|------------------------------------------------|--------------------------------|
| 608 | Segura L; Hansen J; Lowe R                                                                                                 | 2018 | Seasonal shoreline variability induced by sub-tidal water level fluctuations at reef-fringed beaches                                                                                                                                                                                               | Beach Morphodynamics; Fringing Reefs; Leeuwin Current; Sea Level                                                                       | 5  | Journal of Geophysical Research: Earth Surface | 10.1002/2017JF004385           |
| 609 | Lokier S; Court W; Onuma T; Paul A                                                                                         | 2018 | Implications of sealevel rise in a modern carbonate ramp setting                                                                                                                                                                                                                                   | Carbonate Ramp; Coastal Erosion; Persian Gulf; Sea Level; Transgression                                                                | 12 | Geomorphology                                  | 10.1016/j.geomorph.2017.12.023 |
| 610 | Houser C; Wernette P; Weymer B                                                                                             | 2018 | Scale-dependent behavior of the foredune implications for barrier island response to storms and sealevel rise                                                                                                                                                                                      | Barrier Island; Foredune; Recovery; Shoreline Change                                                                                   | 10 | Geomorphology                                  | 10.1016/j.geomorph.2017.12.011 |
| 611 | Li J; Ye M; Pu R; Liu Y; Guo Q; Feng B; Huang R; He G                                                                      | 2018 | Spatiotemporal change patterns of coastlines in Zhejiang province China over the last twenty-five years                                                                                                                                                                                            | Coastline; Coastline Artificialization; Coastline Changes; Land Utilization; Zhejiang Province                                         | 14 | Sustainability (Switzerland)                   | 10.3390/su10020477             |
| 612 | Marcelino A; De S G P L; Costa J                                                                                           | 2018 | Participative planning for managing the seashore of Galinhos Rio Grande do Norte northeast Brazil using remote sensing support and coastal modeling planejamento participativo para a gestão da orla marítima de galinhosrn nordeste brasileiro com apoio de sensores remotos e modelagem costeira | Coastal Erosion; Coastal Modeling; Land Planning; Orla Project; Remote Sensing                                                         | 1  | Desenvolvimento E Meio Ambiente                | 10.5380/dma.v44i0.55034        |
| 613 | Pardo-Pascual J; Sánchez-García E; Almonacid-Caballer J; Palomar-Vázquez J; De L S E; Fernández-Sarría A; Balaguer-Beser A | 2018 | Assessing the accuracy of automatically extracted shorelines on microtidal beaches from Landsat-7, Landsat-8 and sentinel-2 imagery                                                                                                                                                                | Coastal Wave Conditions; Coastline Extraction; IR Bands; Mid-Resolution Satellite Imagery; Sandy Beach Monitoring; Sub-Pixel Precision | 50 | Remote Sensing                                 | 10.3390/rs10020326             |



|     |                                                               |      |                                                                                                                                                                 |                                                                                                               |    |                                                                                                      |                                 |
|-----|---------------------------------------------------------------|------|-----------------------------------------------------------------------------------------------------------------------------------------------------------------|---------------------------------------------------------------------------------------------------------------|----|------------------------------------------------------------------------------------------------------|---------------------------------|
| 614 | Hudson C; Baily B                                             | 2018 | Delivering sustainable coasts monitoring the longterm stability of a breached barrier beach Porlock Bay Somerset, United Kingdom                                | Barrier Beach; Geomorphology; Managed Realignment; Monitoring; Sustainability                                 | 6  | Ocean and Coastal Management                                                                         | 10.1016/j.ocecoaman.2017.11.022 |
| 615 | Thankappan N; Varangalil N; Kachapally V T; Njali-plackil P K | 2018 | Coastal morphology and beach stability along Thiruvananthapuram southwest coast of India                                                                        | BreakwaterRS; Groynes; Morphology; Shoreline Changes                                                          | 8  | Natural Hazards                                                                                      | 10.1007/s11069-017-3090-1       |
| 616 | Fan Y; Chen S; Zhao B; Pan S; Jiang C; Ji H                   | 2018 | Shoreline dynamics of the active Yellow river delta since the implementation of water-sediment regulation scheme: A remotesensing and statistics-based approach | Active Yellow River Delta; River Input; Shoreline Dynamics; The Water-Sediment Regulation Scheme; Wave Energy | 34 | Estuarine, Coastal and Shelf Science                                                                 | 10.1016/j.ecss.2017.11.035      |
| 617 | Uysal M; Polat N; Aydın M                                     | 2018 | Monitoring of coastal erosion of Karasu coast in Black sea                                                                                                      | Coast Erosion; Coastline Change Detection; Landsat                                                            | 0  | Advances In Science, Technology and Innovation                                                       | 10.1007/978-3-319-70548-4_470   |
| 618 | Robertson Q; Dunkin L; Dong Z; Wozencraft J; Zhang K          | 2018 | Florida and us east coast beach change metrics derived from Lidar data utilizing ArcGIS python based tools                                                      | NA                                                                                                            | 2  | Coastal Research Library                                                                             | 10.1007/978-3-319-58304-4_12    |
| 619 | Munawaroh M; Sofian I; Rudiastuti A                           | 2018 | Application of Landsat data for coastline changes detection in south Minahasa Regency                                                                           | MNDWI; Significant Wave Height; Sulawesi; Swan                                                                | 0  | Proceedings - 39th Asian Conference on Remote Sensing: Remote Sensing Enabling Prosperity, ACRS 2018 | NA                              |

|     |                                                                                                                 |      |                                                                                                                          |                                                                                                                  |   |                                                                                                      |                               |
|-----|-----------------------------------------------------------------------------------------------------------------|------|--------------------------------------------------------------------------------------------------------------------------|------------------------------------------------------------------------------------------------------------------|---|------------------------------------------------------------------------------------------------------|-------------------------------|
| 620 | Hyun Y K; Song Y; Kim G                                                                                         | 2018 | Estimation of three dimensional shoreline using terrestrial laser scanning data case: study at Bangameori beach          | Bangamoeri Beach; Coastal Erosions; Laser Scanning Data; Shoreline                                               | 0 | Proceedings - 39th Asian Conference on Remote Sensing: Remote Sensing Enabling Prosperity, ACRS 2018 | NA                            |
| 621 | Arif F; Rahman A; Maulud K                                                                                      | 2018 | Low-cost Unmanned Aerial Vehicle photogrammetric survey and its application for high-resolution shoreline changes survey | Application; Coastal Erosion; Sea-Level Rise; Shoreline Changes; UAV                                             | 0 | Proceedings - 39th Asian Conference on Remote Sensing: Remote Sensing Enabling Prosperity, ACRS 2018 | NA                            |
| 622 | Azhar M; Maulud K; Selamat S; Khan M; Jaafar O; Jaafar W; Abdullah S; Toriman M; Kamarudin M; Gasim M; Juahir H | 2018 | Impact of shoreline changes to the coastal development                                                                   | Climate Changes; Erosion and Accretion; Geographical Information System (GIS); Sea Level Rise; Shoreline Changes | 4 | International Journal of Engineering and Technology(UAE)                                             | NA                            |
| 623 | Uysal M; Polat N; Dereli M                                                                                      | 2018 | Coastline change of the Aksehir lake southwestern Turkey between 1984 and 2016                                           | Aksehir Lake; Change Detection; Coastline; Landsat Image                                                         | 2 | Advances In Science, Technology and Innovation                                                       | 10.1007/978-3-319-70548-4_510 |
| 624 | Afanasev V; Uba A                                                                                               | 2018 | Coastal erosion in the northeastern Sakhalin island                                                                      | Erosion Rhythms; Megacusps; Morphometry of The Beach; North-Eastern Sakhalin; Spatial Structure of The Erosion   | 0 | Geomorfologiya                                                                                       | 10.7868/S043542811804003X     |

|     |                                                             |      |                                                                                                                                        |                                                                                                                        |   |                                                                                              |                                      |
|-----|-------------------------------------------------------------|------|----------------------------------------------------------------------------------------------------------------------------------------|------------------------------------------------------------------------------------------------------------------------|---|----------------------------------------------------------------------------------------------|--------------------------------------|
| 625 | Eremina E; Kharitonova L; Stanichny S                       | 2018 | Estimates of the north Crimean canal cutoff effect on the variability of the Sivash Bay morphometric characteristics on satellite data | Coastline; Lagoon; North-Crimean Canal; Remote Methods; Satellite Images; Sivash Bay                                   | 1 | Sovremennye Problemy Distantionnogo Zondirovaniya Zemli Iz Kosmosa                           | 10.21046/2070-7401-2018-15-7-175-183 |
| 626 | Aguilar F; Fernández I; Aguilar M; García L A               | 2018 | Assessing shoreline change rates in Mediterranean beaches                                                                              | Mediterranean Beaches; Medium-Term Shoreline Evolution; Shoreline Accuracy; Shoreline Change Rate; Shoreline Indicator | 2 | Coastal Research Library                                                                     | 10.1007/978-3-319-58304-4_11         |
| 627 | Manaf S; Mustapha N; Sulaiman M; Husin N; Shafri H; Hamid M | 2018 | Spatiotemporal regression analysis on shorelines data extracted from historical satellite images                                       | Change Analysis; Regression Analysis; Satellite Images; Shoreline Change; Shoreline Prediction                         | 0 | Proceedings of The International Conferences on Www/Internet 2018 and Applied Computing 2018 | NA                                   |
| 628 | Emran A; Rob M; Kabir M                                     | 2018 | Coastline change and erosion accretion evolution of the Sandwip island Bangladesh                                                      | NA                                                                                                                     | 2 | Environmental Information Systems: Concepts, Methodologies, tools, and Applications          | 10.4018/978-1-5225-7033-2.ch068      |
| 629 | Anandkumar A; Vijith H; Nagarajan R; Jonathan M             | 2018 | Evaluation of decadal shoreline changes in the coastal region of Miri Sarawak, Malaysia                                                | Land Cover; Land Use; Malaysia; Sarawak; Shoreline Changes                                                             | 7 | Coastal Management: Global Challenges and Innovations                                        | 10.1016/B978-0-12-810473-6.00008-X   |

|     |                                                         |      |                                                                                                                                                                                                                                                                                |                                                                                                               |   |                                                                                                                |                              |
|-----|---------------------------------------------------------|------|--------------------------------------------------------------------------------------------------------------------------------------------------------------------------------------------------------------------------------------------------------------------------------|---------------------------------------------------------------------------------------------------------------|---|----------------------------------------------------------------------------------------------------------------|------------------------------|
| 630 | Ivan A; Vlasceanu E                                     | 2018 | The monitoring of the shoreline evolution adjacent to maritime ports in the context of marine storms intensification                                                                                                                                                           | Erosion Control Measures; Hydrodynamic Models; Romanian Littoral; Sea-Land Interaction/Msp; Shoreline Retreat | 0 | International Multidisciplinary Scientific Geoconference Surveying Geology and Mining Ecology Management, Sgem | 10.5593/sgem2018/3.1/S12.097 |
| 631 | Du S; Jin B; Li S; Zhou J; Peng S                       | 2018 | The spatial-temporal variation of Fuxian lake area during 1974-2014 based on remote sensing 40                                                                                                                                                                                 | Fuxian Lake; Remote Sensing Dynamic Monitoring; Shoreline Change; Spatial Temporal Variation                  | 0 | Oceanologia ET Limnologia Sinica                                                                               | 10.11693/hyhz20170100012     |
| 632 | Khan E; Hussain N                                       | 2018 | Coastline dynamics and raising landform a geoinformatics based study on the Bay of Bengal, Bangladesh                                                                                                                                                                          | Coastal Dynamics; Geospatial Change; Global Mean Sea Level; Remote Sensing                                    | 3 | Indonesian Journal of Geography                                                                                | 10.22146/ijg.26655           |
| 633 | Dennis A; Senthilnathan L; Machendiranathan M; Ranith R | 2018 | Shoreline demarcation on Tirunelveli coast analysis moving boundaries using R AMBUR statistics                                                                                                                                                                                 | Accretion; AMBUR; Erosion; Landsat; Shoreline; Tirunelveli Coast                                              | 2 | Ecology, Environment and Conservation                                                                          | NA                           |
| 634 | Santos E; Bonetti J                                     | 2018 | Analysis of the Enseada de tijucas sc shoreline change rate in different time scales as indicator of coastal susceptibility análise da taxa de variação da linha de costa da enseada de tijucas sc em diferentes escalas temporais como indicadora de suscetibilidade costeira | Coastal Inundation; DSAS; Spatial Analysis                                                                    | 2 | Quaternary and Environmental Geosciences                                                                       | NA                           |
| 635 | Akamatsu S; Tajima Y; Shimozono T; Sato S               | 2018 | Study on applicability of synthetic aperture radar for shoreline monitoring                                                                                                                                                                                                    | Alos-2; Coastal Erosion; Monitoring Shoreline; Synthetic Aperture Radar                                       | 0 | Proceedings of The 9th International Conference on APAC 2017                                                   | 10.1142/9789813233812_0057   |

|     |                                                                                             |      |                                                                                                                                             |                                                                                                                        |    |                                                                                  |                                 |
|-----|---------------------------------------------------------------------------------------------|------|---------------------------------------------------------------------------------------------------------------------------------------------|------------------------------------------------------------------------------------------------------------------------|----|----------------------------------------------------------------------------------|---------------------------------|
| 636 | Caputo T; Marino E; Matano F; Somma R; Troise C; De N G                                     | 2018 | Terrestrial laser scanning tls data for the analysis of coastal Tuff cliff retreat application to Coroglio cliff Naples, Italy              | 3d Modeling; Campi Flegrei; Coastal Erosion; Coroglio; Italy; Retreat Analysis; Terrestrial Laser Scanning; Tuff Cliff | 8  | Annals of Geophysics                                                             | 10.4401/ag-7494                 |
| 637 | Nandi N                                                                                     | 2018 | Morphodynamics of coastal lagoons an analysis of multitemporal Landsat images of Segara Anakan lagoon area                                  | Coastal Lagoon; Landsat Images; Morphodynamic; Multitemporal; Segara Anakan                                            | 1  | Pertanika Journal of Science and Technology                                      | NA                              |
| 638 | Jayanthi M; Thirumurthy S; Samynathan M; Duraisamy M; Muralidhar M; Ashokkumar J; Vijayan K | 2018 | Shoreline change and potential sea level rise impacts in a climate hazardous location in southeast coast of India                           | Adaptations Measures; Climate Change Impact; GIS; Remote Sensing; Sea Level Rise; Shoreline Change                     | 14 | Environmental Monitoring and Assessment                                          | 10.1007/s10661-017-6426-0       |
| 639 | Kelly J; Gontz A                                                                            | 2018 | Using GPS-surveyed intertidal zones to determine the validity of shorelines automatically mapped by Landsat water indices                   | Brazil; Coastal Change; Geomorphology; Massachusetts; Remote Sensing; Satellite Imagery                                | 33 | International Journal of Applied Earth Observation and Geoinformation            | 10.1016/j.jag.2017.10.007       |
| 640 | Young A                                                                                     | 2018 | Decadal-scale coastal cliff retreat in southern and central California                                                                      | California; Coastal Cliffs; Coastal Erosion; LIDAR                                                                     | 34 | Geomorphology                                                                    | 10.1016/j.geomorph.2017.10.010  |
| 641 | Ahmed A; Drake F; Nawaz R; Woulds C                                                         | 2018 | Where is the coast monitoring coastal land dynamics in Bangladesh an integrated management approach using GIS and remote sensing techniques | Accretion; Erosion; Geomorphology; Land Dynamics; Remote Sensing                                                       | 26 | Ocean and Coastal Management                                                     | 10.1016/j.ocecoaman.2017.10.030 |
| 642 | Wu X; Liu C; Wu G                                                                           | 2018 | Spatialtemporal analysis and stability investigation of coastline changes: A case study in Shenzhen, China                                  | Coastline; Coastline Change Rate (CCR); Coastline Stability; Data-Mining Technology; Objected-Based Techniques         | 11 | IEEE Journal of Selected topics In Applied Earth Observations and Remote Sensing | 10.1109/JSTARS.2017.2755444     |

|      |                                                                                                      |      |                                                                                                                                                                         |                                                                                                                                                   |    |                                               |                                 |
|------|------------------------------------------------------------------------------------------------------|------|-------------------------------------------------------------------------------------------------------------------------------------------------------------------------|---------------------------------------------------------------------------------------------------------------------------------------------------|----|-----------------------------------------------|---------------------------------|
| 643  | Zhang X; Yang Z; Zhang Y; Ji Y; Wang H; Lv K; Lu Z                                                   | 2018 | Spatial and temporal shoreline changes of the southern Yellow river Huanghe delta in 1976-2016                                                                          | Beach Slope; Instantaneous Shoreline Position; Relative Sea Level Rise; Sea Level Correction; Shoreline Erosion Rate; Southern Yellow River Delta | 27 | Marine Geology                                | 10.1016/j.margeo.2017.10.006    |
| 644  | Fernández-Montblanc T; Del R L; Izquierdo A; Gracia F; Bethencourt M; Benavente J                    | 2018 | Shipwrecks and manmade coastal structures as indicators of historical shoreline position an interdisciplinary study in the Sancti Petri sand spit Bay of Cádiz SW Spain | Dispersion Model; Historical Maps; Nao Index; Numerical Modelling; Shoreline Retreat                                                              | 4  | Marine Geology                                | 10.1016/j.margeo.2017.10.005    |
| 1727 | Young A; Flick R; Gallien T; Giddings S; Guza R; Harvey M; Lenain L; Ludka B; Melville W; O'Reilly W | 2018 | Southern California coastal response to the 2015-2016 El Nino                                                                                                           | ENSO; Coastal; Erosion; Beach; Cliff; Estuary                                                                                                     | 7  | Journal of Geophysical Research-Earth Surface | 10.1029/2018JF004771            |
| 1731 | Dietz M; Liu K; Bianchette T                                                                         | 2018 | Hurricanes as a major driver of coastal erosion in the Mississippi river delta a multidecadal analysis of shoreline retreat rates at Bay Champagne Louisiana, USA       | Shoreline Retreat; Coastal Erosion; Hurricanes; Mississippi River Delta                                                                           | 7  | Water                                         | 10.3390/w10101480               |
| 1738 | Hakkou M; Maanan M; Belrhaba T; El K; El O D; Benmohammadi A                                         | 2018 | Multidecadal assessment of shoreline changes using geospatial tools and automatic computation in Kenitra coast Morocco                                                  | Shoreline Evolution; Beach and Dune Erosion; Hazard Mapping; Anthropogenic Impacts; Geospatial Technique; Spatial Analyst                         | 14 | Ocean & Coastal Management                    | 10.1016/j.ocecoaman.2018.07.003 |
| 1741 | Tereszkiewicz P; McKinney N; Meyer-Arendt K                                                          | 2018 | Groins along the northern Yucatan coast                                                                                                                                 | Erosion; Shoreline Protection; Coastal Management                                                                                                 | 6  | Journal of Coastal Research                   | 10.2112/JCOASTRES-D-17-00062.1  |
| 1742 | Akinluyi F; Adebola A; Adeseko A                                                                     | 2018 | Assessment of shoreline and associated landuse/land cover changes along part of Lagos coastline Nigeria                                                                 | Shoreline Change; Landuse/Land Cover; Accretion; Erosion and Lagos                                                                                | 5  | Contemporary Trends In Geoscience             | 10.2478/ctg-2018-0004           |

|      |                                                                                   |      |                                                                                                                                                                         |                                                                                                                 |   |                                                                                     |                                 |
|------|-----------------------------------------------------------------------------------|------|-------------------------------------------------------------------------------------------------------------------------------------------------------------------------|-----------------------------------------------------------------------------------------------------------------|---|-------------------------------------------------------------------------------------|---------------------------------|
| 1759 | Marcelino A; Pinheiro L; Costa J                                                  | 2018 | Participative planning for managing the seashore of Galinhos Rio Grande do Norte northeast Brazil using remote sensing support and coastal modeling                     | Coastal Erosion; Land Planning; Orla Project; Coastal Modeling; Remote Sensing                                  | 1 | Desenvolvimento E Meio Ambiente                                                     | 10.5380/dma.v44i0.55034         |
| 1775 | Duarte C; De M F; Landau L; Souto M; Sabadia J; Da S C; Rodrigues L; Damasceno A  | 2018 | Short-time analysis of shoreline based on RapidEye satellite images in the terminal area of Pecem port Ceara, Brazil                                                    | NA                                                                                                              | 6 | International Journal of Remote Sensing                                             | 10.1080/01431161.2018.1457229   |
| 1777 | Sreekesh S; Naik S; Rani S                                                        | 2018 | Effect of sea level changes on the groundwater quality along the coast of Ernakulam district Kerala                                                                     | Sea Level Rise; Shoreline Changes; Salt Water Intrusion; Digital Shoreline Analysis System; Groundwater Quality | 5 | Journal of Climate Change                                                           | 10.3233/JCC-1800013             |
| 1778 | Prieto J; Munar F; Perea A; Buades G; Gual M; Ferrer B                            | 2018 | Analysis of historic coastline evolution of Es Trenc beach (s de Mallorca): Causes and consequences                                                                     | Mallorca; Es Trenc; Coastal Management; Erosion; GIS; DSAS                                                      | 0 | Geofocus-Revista Internacional De Ciencia Y Tecnologia De La Informacion Geografica | 10.21138/GF.544                 |
| 1782 | Fernandez-Montblanc T; Del R L; Izquierdo A; Gracia F; Bethencourt M; Benavente J | 2018 | Shipwrecks and manmade coastal structures as indicators of historical shoreline position an interdisciplinary study in the Sancti petri sand spit Bay of Cadiz SW Spain | Shoreline Retreat; Numerical Modelling; Dispersion Model; Historical Maps; Nao Index                            | 4 | Marine Geology                                                                      | 10.1016/j.margeo.2017.10.005    |
| 2210 | Stancioff C; Vermeer J; Mukhopadhyay A; De R S; Brown G; Hofman C                 | 2018 | Predicting coastal erosion in st kitts collaborating for nature and culture                                                                                             | NA                                                                                                              | 4 | Ocean & Coastal Management                                                          | 10.1016/j.ocecoaman.2017.09.015 |
| 2212 | HisaBayashi M; Rogan J; Elmes A                                                   | 2018 | Quantifying shoreline change in Funafuti Atoll Tuvalu using a time series of Quick-Bird WorldView and Landsat data vol 55 pg 307 2017                                   | NA                                                                                                              | 0 | GIScience & Remote Sensing                                                          | 10.1080/15481603.2017.1377954   |

|     |                                                                                        |      |                                                                                                                                                                                           |                                                                                                          |    |                                                                       |                                    |
|-----|----------------------------------------------------------------------------------------|------|-------------------------------------------------------------------------------------------------------------------------------------------------------------------------------------------|----------------------------------------------------------------------------------------------------------|----|-----------------------------------------------------------------------|------------------------------------|
| 392 | Foti G; Barbaro G;<br>Bombino G; Fiamma V;<br>Puntorieri P; Minniti F;<br>Pezzimenti C | 2019 | Shoreline changes near river<br>mouth: case study of Santagata<br>river Reggio Calabria, Italy                                                                                            | EPR; Longshore<br>Transport; NSM;<br>River Transport;<br>Shoreline Changes;<br>Shoreline Position        | 16 | European Journal<br>of Remote Sensing                                 | 10.1080/22797254.2019.168695<br>5  |
| 393 | Taufik M; Nugraini L;<br>Pratomo D; Bioresita F                                        | 2019 | The study of SSC patterns on<br>coastline changes in Socah Gulf<br>using Landsat imagery and in<br>situ data                                                                              | NA                                                                                                       | 0  | IOP Conference Se-<br>ries: Earth and En-<br>vironmental Sci-<br>ence | 10.1088/1755-<br>1315/389/1/012008 |
| 394 | Qin Y; Ye L; Chen S                                                                    | 2019 | Study on coastline changes of<br>Xiamen city based on remote<br>sensing images                                                                                                            | NA                                                                                                       | 0  | E3S Web of Con-<br>ferences                                           | 10.1051/E3Sconf/20191360500<br>3   |
| 395 | Alicandro M; Baiocchi V;<br>Brigante R; Radicioni F                                    | 2019 | Automatic shoreline detection<br>from eight-band VHR satellite<br>imagery                                                                                                                 | Abruzzo; Coastline;<br>Multispectral Classifi-<br>cation; Shoreline;<br>Worldview-2                      | 6  | Journal of Marine<br>Science and Engi-<br>neering                     | 10.3390/jmse7120459                |
| 396 | Lin Y; Cheng Y; Zhou T;<br>Ravi R; Hasheminasab S;<br>Flatt J; Troy C; Habib A         | 2019 | Evaluation of UAV Lidar for<br>mapping coastal environments                                                                                                                               | Erosion; LIDAR;<br>Point Clouds; Shore-<br>line; Structure from<br>Motion; Unmanned<br>Aerial Vehicles   | 43 | Remote Sensing                                                        | 10.3390/rs11242893                 |
| 397 | Chaiwongsaen N;<br>Choowong M                                                          | 2019 | Assessment of the lower Ping<br>rivers riverbank erosion and ac-<br>cretion northern Thailand using<br>geospatial technique implication<br>for river flow and sediment load<br>management | Lower Ping River;<br>Riverbank Ero-<br>sion/Accretion;<br>Sandbar; Succession<br>of Weir                 | 0  | Environmentasia                                                       | 10.14456/ea.2019.61                |
| 398 | Ding X; Shan X; Chen Y;<br>Jin X; Muhammed F                                           | 2019 | Dynamics of shoreline and land<br>reclamation from 1985 to 2015 in<br>the Bohai sea China                                                                                                 | Bohai Sea; China;<br>Land Reclamation;<br>Shape Index of The<br>Bay; Shoreline<br>Change                 | 13 | Journal of Geo-<br>graphical Sciences                                 | 10.1007/s11442-019-1703-1          |
| 399 | Gonçalves R; Saleem A;<br>Queiroz H; Awange J                                          | 2019 | A fuzzy model integrating<br>shoreline changes NDVI and set-<br>tlement influences for coastal<br>zone human impact classifica-<br>tion                                                   | Fuzzy; Human Im-<br>pact Classification;<br>Landscape Evolution;<br>NDVI; Remote Sens-<br>ing; Shoreline | 12 | Applied Geogra-<br>phy                                                | 10.1016/j.apgeog.2019.102093       |



|     |                                                                                      |      |                                                                                                                                              |                                                                                                                                                               |    |                                                            |                                      |
|-----|--------------------------------------------------------------------------------------|------|----------------------------------------------------------------------------------------------------------------------------------------------|---------------------------------------------------------------------------------------------------------------------------------------------------------------|----|------------------------------------------------------------|--------------------------------------|
| 400 | Zhang R; Chen L; Liu S;<br>Zhang H; Gong W; Lin G                                    | 2019 | Shoreline evolution in an em-<br>bayed beach adjacent to tidal in-<br>let the impact of anthropogenic<br>activities                          | Coawst Model; Em-<br>bayed Beach; Re-<br>mote Sensing; Shore-<br>line Evolution; Tidal<br>Inlet                                                               | 7  | Geomorphology                                              | 10.1016/j.geo-<br>morph.2019.106856  |
| 401 | Thior M; Sané T; Dièye E;<br>Sy O; Cissokho D; Ba B;<br>Descroix L                   | 2019 | Coastline dynamics of the north-<br>ern lower Casamance Senegal<br>and southern Gambia littoral<br>from 1968 to 2017                         | Coastal Evolution;<br>Coastlines Erosion;<br>Gambia; Geospatial<br>Techniques; Lower<br>Casamance; Risk<br>Mapping                                            | 7  | Journal of African<br>Earth Sciences                       | 10.1016/j.jafrearsci.2019.10361<br>1 |
| 402 | El-Ashmawy N                                                                         | 2019 | Automatic determination of<br>shoreline at maximum retreating                                                                                | Classification;<br>Coastal Areas; Kine-<br>matic GPS; Landsat;<br>Mean Higher-High<br>Water Level<br>(MHHWL); Shore-<br>line Extraction;<br>Tides Effect      | 1  | Egyptian Journal of<br>Remote Sensing<br>and Space Science | 10.1016/j.ejrs.2019.07.001           |
| 403 | Holdaway A; Ford M                                                                   | 2019 | Resolution and scale controls on<br>the accuracy of Atoll island<br>shorelines interpreted from sat-<br>ellite imagery                       | Accuracy; Atoll Is-<br>lands; Remote Sens-<br>ing; Resolution;<br>Scale                                                                                       | 5  | Applied Geomatics                                          | 10.1007/s12518-019-00266-7           |
| 404 | Vos K; Splinter K; Harley<br>M; Simmons J; Turner I                                  | 2019 | CoastSat a Google Earth Engine-<br>enabled python toolkit to extract<br>shorelines from publicly availa-<br>ble satellite imagery            | Google Earth Engine;<br>Landsat; Sentinel-2;<br>Shoreline Mapping;<br>Sub-Pixel Resolution                                                                    | 73 | Environmental<br>Modelling and<br>Software                 | 10.1016/j.envsoft.2019.104528        |
| 405 | Cabezas-Rabadán C;<br>Pardo-Pascual J; Palomar-<br>Vázquez J; Fernández-<br>SARría A | 2019 | Characterizing beach changes<br>using high-frequency Sentinel-2<br>derived shorelines on the Valen-<br>cian coast Spanish Mediterra-<br>nean | Beach Nourishment;<br>Coastal Erosion; En-<br>vironmental Monitor-<br>ing; Remote Sensing;<br>Shoreline-Position<br>Variability; Short-<br>Term Beach Changes | 9  | Science of The total<br>Environment                        | 10.1016/j.sci-<br>totenv.2019.07.084 |

|     |                                                                        |      |                                                                                                                                                                                                     |                                                                                                                                       |    |                                                |                                |
|-----|------------------------------------------------------------------------|------|-----------------------------------------------------------------------------------------------------------------------------------------------------------------------------------------------------|---------------------------------------------------------------------------------------------------------------------------------------|----|------------------------------------------------|--------------------------------|
| 406 | Anthony E; Besset M;<br>Dussouillez P; Goichot M;<br>Loisel H          | 2019 | Overview of the monsoon-influenced Ayeyarwady river delta and delta shoreline mobility in response to changing fluvial sediment supply                                                              | Ayeyarwady;<br>Coastal Suspended Particulate Matter; Delta Erosion; Gulf of Martaban; Monsoon-Influenced Delta; River Sediment Supply | 11 | Marine Geology                                 | 10.1016/j.margeo.2019.106038   |
| 407 | Medellín G; Torres-Freyermuth A                                        | 2019 | Morphodynamics along a microtidal sea breeze dominated beach in the vicinity of coastal structures                                                                                                  | CACS Events; Coastal Structures; Eof Analysis; Sea Breezes; Shoreline Variability; Tropical Beach; Yucatan Peninsula                  | 10 | Marine Geology                                 | 10.1016/j.margeo.2019.106013   |
| 408 | Ruiz-Beltran A; Astorga-Moar A; Salles P; Appendini C                  | 2019 | Short-term shoreline trend detection patterns using SPOT-5 image fusion in the northwest of Yucatan Mexico                                                                                          | and Human Impacts; Coastal Hazard; DSAS; Pan-Sharpening; Shoreline Change; Spatial Analysis; Spot-5                                   | 10 | Estuaries and Coasts                           | 10.1007/s12237-019-00573-7     |
| 409 | Nikolakopoulos K; Kyriou A; Koukouvelas I; Zygouri V; Apostolopoulos D | 2019 | Combination of aerial satellite and UAV photogrammetry for mapping the diachronic coastline evolution: the case of Lefkada island                                                                   | Air Photos; Coastline; Declassified Satellite Imagery; Lefkada Island; Photogrammetry; Pleiades; Remote Sensing; UAV                  | 20 | ISPRS International Journal of Geo-Information | 10.3390/ijgi8110489            |
| 410 | Li X; Long D; Huang Q; Han P; Zhao F; Wada Y                           | 2019 | High-temporal-resolution water level and storage change data sets for lakes on the Tibetan plateau during 2000-2017 using multiple altimetric missions and Landsat-derived lake shoreline positions | NA                                                                                                                                    | 53 | Earth System Science Data                      | 10.5194/essd-11-1603-2019      |
| 411 | Kombiadou K; Matias A; Ferreira ; Carrasco A; Costas S; Plomaritis T   | 2019 | Impacts of human interventions on the evolution of the Ria Formosa barrier island system S Portugal                                                                                                 | Barrier Recovery; Coastline Changes; Evolution Regimes; Inlet Stabilisations; Remote Sensing                                          | 12 | Geomorphology                                  | 10.1016/j.geomorph.2019.07.006 |

|     |                                                                        |      |                                                                                                                                                              |                                                                                               |    |                                         |                                  |
|-----|------------------------------------------------------------------------|------|--------------------------------------------------------------------------------------------------------------------------------------------------------------|-----------------------------------------------------------------------------------------------|----|-----------------------------------------|----------------------------------|
| 412 | Besset M; Gratiot N; Anthony E; Bouchette F; Goichot M; Marchesiello P | 2019 | Mangroves and shoreline erosion in the Mekong river delta Vietnam                                                                                            | Coastal Squeeze; Mangroves; Mekong River Delta; Sediment Supply; Shoreline Erosion            | 19 | Estuarine, Coastal and Shelf Science    | 10.1016/j.ecss.2019.106263       |
| 413 | Pagán J; Bañón L; López I; Bañón C; Aragonés L                         | 2019 | Monitoring the dune-beach system of Guardamar del Segura Spain using UAV, SFM and GIS techniques                                                             | DEM; Dune Erosion; GIS; SFM; Shoreline Evolution; UAV                                         | 14 | Science of The total Environment        | 10.1016/j.scitotenv.2019.06.186  |
| 414 | Akay S; Ozcan O; Sen O                                                 | 2019 | Modeling morphodynamic processes in a meandering river with Unmanned Aerial Vehicle-based measurements                                                       | Büyük; Erosion; Menderes River; River Morphology; Structure From Motion                       | 5  | Journal of Applied Remote Sensing       | 10.1117/1.JRS.13.044523          |
| 415 | Zhou M; Wu M; Zhang G; Zhao L; Hou X; Yang Y                           | 2019 | Analysis of coastal zone data of northern Yantai collected by remote sensing from 1990 to 2018                                                               | Coastal Zone; Coastline; Jiaodong Peninsula; Remote Sensing                                   | 3  | Applied Sciences (Switzerland)          | 10.3390/app9204466               |
| 416 | Ataol M; Kale M; Tekkanat S                                            | 2019 | Assessment of the changes in shoreline using digital shoreline analysis system a case study of Kızılırmak delta in northern Turkey from 1951 to 2017         | COASTAL EROSION; DAM; DSAS; Kızılırmak DELTA; Kızılırmak RIVER                                | 10 | Environmental Earth Sciences            | 10.1007/s12665-019-8591-7        |
| 417 | Yue H; Liu Y                                                           | 2019 | Variations in the lake area water level and water volume of Hongjiannao lake during 1986-2018 based on Landsat and ASTER, GDEM data                          | Aster GDEM; Lake Area; Lake Volume Variation; Landsat; NSM and LRR; Water Level               | 11 | Environmental Monitoring and Assessment | 10.1007/s10661-019-7715-6        |
| 418 | Özpolat E; Demir T                                                     | 2019 | The spatiotemporal shoreline dynamics of a delta under natural and anthropogenic conditions from 1950 to 2018 a dramatic case from the eastern Mediterranean | Anthropogenic Effects; Coastal Erosion; Mediterranean; Seyhan Delta; Shoreline Changes        | 4  | Ocean and Coastal Management            | 10.1016/j.ocecoaman.2019.104910  |
| 419 | Zhang X; Lu K; Yin P; Zhu L                                            | 2019 | Current and future mudflat losses in the southern Huanghe delta due to coastal hard structures and shoreline retreat                                         | Coastal Hard Structure; Mudflat Loss; Mudflat Restoration; Satellite Image; Shoreline Retreat | 6  | Coastal Engineering                     | 10.1016/j.coastaleng.2019.103530 |

|     |                                                                                     |      |                                                                                                                                                                    |                                                                                                                                  |    |                                                   |                                |
|-----|-------------------------------------------------------------------------------------|------|--------------------------------------------------------------------------------------------------------------------------------------------------------------------|----------------------------------------------------------------------------------------------------------------------------------|----|---------------------------------------------------|--------------------------------|
| 420 | Reeve D; Horrillo-Caraballo J; Karunarathna H; Pan S                                | 2019 | A new perspective on mesoscale shoreline dynamics through data-driven analysis                                                                                     | Beach Morphology; Data Driven Analysis; Foreshore Change Classification; Meso-Scale                                              | 3  | Geomorphology                                     | 10.1016/j.geomorph.2019.04.033 |
| 421 | Armenio E; De S F; Mossa M; Petrillo A                                              | 2019 | Coastline evolution based on statistical analysis and modeling                                                                                                     | NA                                                                                                                               | 7  | Natural Hazards and Earth System Sciences         | 10.5194/nhess-19-1937-2019     |
| 422 | Emam W; Khalil M; Nassif M; Soliman K                                               | 2019 | Applying geospatial technology in assessing the coastal vulnerability of Zaranik protectorate to sealevel rise                                                     | Coastal Slope; DSAS; Erosion/Accretion; Geomorphology; North Sinai; Satellite Images; Sea-Level Rise (Slr); Zaranik Protectorate | 0  | Egyptian Journal of Aquatic Biology and Fisheries | 10.21608/ejabf.2019.202267     |
| 423 | Miranda I; Toldo J; Da F K A; Da S G                                                | 2019 | Shoreline evolution of lagoon sandy spits and adjacent beaches Lagoa dos Patos, Brazil                                                                             | Change Polygon Method; DSAS; Lagoon Spit Evolution; Landsat Images                                                               | 4  | Journal of Coastal Research                       | 10.2112/JCOASTRES-D-18-00092.1 |
| 424 | Chaumillon E; Cange V; Gaudefroy J; Merle T; Bertin X; Pignon C                     | 2019 | Controls on shoreline changes at pluriannual to secular timescale in mixed-energy rocky and sedimentary estuarine systems                                          | Beach Erosion; Bed-rock Control; Shoreline Evolution; Storm; Tidal Inlet; Wave Exposition                                        | 3  | Journal of Coastal Research                       | 10.2112/SI88-011.1             |
| 425 | Valeyev A; Karatayev M; AbitBayeva A; UxukBayeva S; Bektursynova A; Sharapkhanova Z | 2019 | Monitoring coastline dynamics of Alakol lake in Kazakhstan using remote sensing data                                                                               | Alakol Lake; Coastline Dynamics; Kazakhstan; Water Resources                                                                     | 13 | Geosciences (Switzerland)                         | 10.3390/geosciences9090404     |
| 426 | Jolivet M; Gardel A; Anthony E                                                      | 2019 | Multidecadal changes on the mud-dominated coast of western French Guiana implications for mesoscale shoreline mobility river-mouth deflection and sediment sorting | Amazon River; Chenier; Guianas Coast; Mangroves; Mud Bank; Mud Cape                                                              | 3  | Journal of Coastal Research                       | 10.2112/SI88-014.1             |
| 427 | Kelly J; Mcsweeney S; Shulmeister J; Gontz A                                        | 2019 | Bimodal climate control of shoreline change influenced by interdecadal Pacific oscillation variability along the Cooloola sand mass Queensland, Australia          | Climate Change; Coastal Erosion; IPO; Landsat; SOI; STR                                                                          | 10 | Marine Geology                                    | 10.1016/j.margeo.2019.105971   |

|     |                                                                   |      |                                                                                                                                                             |                                                                                      |   |                                                                                                                |                                           |
|-----|-------------------------------------------------------------------|------|-------------------------------------------------------------------------------------------------------------------------------------------------------------|--------------------------------------------------------------------------------------|---|----------------------------------------------------------------------------------------------------------------|-------------------------------------------|
| 428 | Jeihouni M; Kakroodi A; Hamzeh S                                  | 2019 | Monitoring shallow coastal environment using Landsat altimetry data under rapid sealevel change                                                             | Caspian Sea; Lake Altimetry; PSO; Sea-Level Fluctuations; Shoreline Detection        | 5 | Estuarine, Coastal and Shelf Science                                                                           | 10.1016/j.ecss.2019.05.005                |
| 429 | Montreuil A; Chen M; Esquerré A; Houthuys R; Moelans R; Bogaert P | 2019 | Pre and post-storm Lidar surveys for assessment of impact on coastal erosion                                                                                | Beach Features; Belgian Coast; Coastline; Morphology; Topographic Monitoring         | 0 | International Archives of The Photogrammetry, Remote Sensing and Spatial Information Sciences - ISPRS Archives | 10.5194/isprs-archives-XLII-3-W8-261-2019 |
| 430 | Indrawan I; Damayanti A; Rustanto A                               | 2019 | Abrasion and accretion at west of Buleleng subdistricts coastal area Bali: Case study Gerokgak Regency Seririt Regency Banjar, Regency and Buleleng Regency | NA                                                                                   | 0 | IOP Conference Series: Earth and Environmental Science                                                         | 10.1088/1755-1315/311/1/012010            |
| 431 | Chairani C; Saraswati R; Shidiq I                                 | 2019 | Identification of changes mangrove areas toward shoreline changes in east coast of surabaya 2004-2017                                                       | NA                                                                                   | 2 | IOP Conference Series: Earth and Environmental Science                                                         | 10.1088/1755-1315/311/1/012002            |
| 432 | Seymour A; Ridge J; Newton E; Rodriguez A; Johnston D             | 2019 | Geomorphic response of inlet barrier islands to storms                                                                                                      | Coastal Erosion; Estuarine Beaches; Low-Energy Shorelines; Unmanned Aircraft Systems | 5 | Geomorphology                                                                                                  | 10.1016/j.geomorph.2019.04.021            |
| 433 | Prasetyo Y; Bashit N; Sasmito B; Setianingsih W                   | 2019 | Impact of land subsidence and sea level rise influence shoreline change in the coastal area of Demak                                                        | Altimetry Satellite; Land Subsidence; Sea Level Rise; Shoreline                      | 4 | IOP Conference Series: Earth and Environmental Science                                                         | 10.1088/1755-1315/280/1/012006            |
| 434 | Lee Y; Eom J; Do J; Kim B; Ryu J                                  | 2019 | Shoreline movement monitoring and geomorphologic changes of beaches using Lidar and UAV's images on the coast of the east sea Korea                         | DSAS; Geomorphological Change; LIDAR; Shoreline Movement; UAV                        | 6 | Journal of Coastal Research                                                                                    | 10.2112/SI90-052.1                        |

|     |                                                                    |      |                                                                                                                                        |                                                                                                                                              |    |                                            |                                  |
|-----|--------------------------------------------------------------------|------|----------------------------------------------------------------------------------------------------------------------------------------|----------------------------------------------------------------------------------------------------------------------------------------------|----|--------------------------------------------|----------------------------------|
| 435 | Park S; Achmad A; Syifa M; Lee C                                   | 2019 | Machine learning application for coastal area change detection in Gangwon province South Korea using high-resolution satellite imagery | Change Detection; Planet Scope; Support Vector Machine                                                                                       | 6  | Journal of Coastal Research                | 10.2112/SI90-028.1               |
| 436 | Jeong H                                                            | 2019 | A study on changes in coastal erosion environment by time series coastal detection using GIS                                           | Coastal Erosion; GIS; Statistical Analysis; Time Series Coastal Detection                                                                    | 2  | Journal of Coastal Research                | 10.2112/SI91-067.1               |
| 437 | Dhanalakshmi S; Kankara R; Chenthamil S                            | 2019 | Impact assessment of sealevel rise over coastal landforms a case study of Cuddalore coast southeast coast of India                     | Bruun Rule; Digital Shoreline Analysis System (DSAS); GIS; Impact Assessment; Modified Bruun Rule; Sea-Level Rise; Shoreline Change Analysis | 3  | Environmental Earth Sciences               | 10.1007/s12665-019-8463-1        |
| 438 | Song Y; Liu F; Ling F; Yue L                                       | 2019 | Automatic semiglobal artificial shoreline subpixel localization algorithm for Landsat imagery                                          | Intensity Integral Error; Semi-Global Subpixel Localization; Shoreline Mapping                                                               | 9  | Remote Sensing                             | 10.3390/rs11151779               |
| 439 | Bagheri M; Zaiton I Z; Bin M S; Abd M L; Badarulzaman N; Vaghefi N | 2019 | Shoreline change analysis and erosion prediction using historical data of Kuala Terengganu Malaysia                                    | Bruun Model; GIS; Particle Size Analysis; Sand Transportation; Sandy Beach Erosion                                                           | 9  | Environmental Earth Sciences               | 10.1007/s12665-019-8459-x        |
| 440 | Vos K; Harley M; Splinter K; Simmons J; Turner I                   | 2019 | Sub-annual to multidecadal shoreline variability from publicly available satellite imagery                                             | Google Earth Engine; Landsat; Optical Imaging Satellites; Semivariogram Analysis; Sentinel-2; Shoreline Detection                            | 90 | Coastal Engineering                        | 10.1016/j.coastaleng.2019.04.004 |
| 441 | Saleem A; Awange J                                                 | 2019 | Coastline shift analysis in data deficient regions exploiting the high spatiotemporal resolution Sentinel-2 products                   | Coastal Erosion; Coastal Shift; Liberia; Remote Sensing; Sentinel-2; Somalia                                                                 | 9  | Catena                                     | 10.1016/j.catena.2019.03.023     |
| 442 | Sowmya K; Sri M; Bhaskar A; Jayappa K                              | 2019 | Longterm coastal erosion assessment along the coast of Karnataka west coast of India                                                   | End Point Rate; Erosion; Karnataka Coast; Landsat                                                                                            | 9  | International Journal of Sediment Research | 10.1016/j.ijsrc.2018.12.007      |

|     |                                             |      |                                                                                                                                    |                                                                           |    |                                                                                      |                                |
|-----|---------------------------------------------|------|------------------------------------------------------------------------------------------------------------------------------------|---------------------------------------------------------------------------|----|--------------------------------------------------------------------------------------|--------------------------------|
| 443 | Adela I; Setya N G; Irham M; Syahreza S     | 2019 | Spatial analysis of post tsunami 2004 coastline changes in Lam-Puuk Aceh Besar                                                     | NA                                                                        | 2  | IOP Conference Series: Earth and Environmental Science                               | 10.1088/1755-1315/273/1/012046 |
| 444 | Sankar R; Murray M; Wells P                 | 2019 | Decadal scale patterns of shoreline variability in Paulatuk NWT Canada                                                             | Coastal Change; Erosion; Landsat; Sea-Ice; Shoreline; Storminess          | 4  | Polar Geography                                                                      | 10.1080/1088937X.2019.1597395  |
| 445 | Tajima Y; Wu L; Fuse T; Shimozono T; Sato S | 2019 | Study on shoreline monitoring system based on satellite SAR imagery                                                                | Alos-2; Backscattering Coefficient; Pal-SAR-2; SAR; Shoreline Monitoring  | 4  | Coastal Engineering Journal                                                          | 10.1080/21664250.2019.1619252  |
| 446 | Nandaniko M; Supriatna S; Manessa M         | 2019 | Modeling of coastline change by viewing trends from the abrasion and accretion rate in Karawang Regency                            | Abrasion; Accretion; Coastline Changes; Karawang; Model                   | 0  | Proceedings - 2019 5th International Conference on Science and Technology, ICST 2019 | 10.1109/ICST47872.2019.9166274 |
| 447 | Hu X; Wang Y                                | 2019 | Coastlines change of the Pearl river estuary in the past 40 years using Landsat dataset and its environmental implications         | Coastline; DSAS; Landsat; Pearl River Estuary; Spatiotemporal Changes     | 1  | International Geoscience and Remote Sensing Symposium (IGARSS)                       | 10.1109/IGARSS.2019.8898452    |
| 448 | Marrero L                                   | 2019 | Using airborne and UAS aerial images to evaluate coastal change and impacts to archaeological sites along loízas coast Puerto Rico | Aerial Images; Archaeological Sites; Coastal Change; DSAS; Erosion; UAS   | 2  | International Geoscience and Remote Sensing Symposium (IGARSS)                       | 10.1109/IGARSS.2019.8899100    |
| 449 | Ai B; Zhang R; Zhang H; Ma C; Gu F          | 2019 | Dynamic process and artificial mechanism of coastline change in the Pearl river estuary                                            | Coastline Change; Development Factor; Human Activity; Pearl River Estuary | 15 | Regional Studies In Marine Science                                                   | 10.1016/j.rsma.2019.100715     |

(PRE); Remote Sensing

|     |                                                                                                         |      |                                                                                                                                                                  |                                                                                                                                                    |    |                                                 |                                 |
|-----|---------------------------------------------------------------------------------------------------------|------|------------------------------------------------------------------------------------------------------------------------------------------------------------------|----------------------------------------------------------------------------------------------------------------------------------------------------|----|-------------------------------------------------|---------------------------------|
| 450 | Shetty A; Jayappa K; Ramakrishnan R; Rajawat A                                                          | 2019 | Shoreline dynamics and vulnerability assessment along the Karnataka coast India a geostatistical approach                                                        | Coastal Vulnerability Index; DSAS; Geomorphology; Littoral Cells; Shoreline Dynamics                                                               | 5  | Journal of The Indian Society of Remote Sensing | 10.1007/s12524-019-00980-0      |
| 451 | Lowe M; Adnan F; Hamylton S; Carvalho R; Woodroffe C                                                    | 2019 | Assessing reef-island shoreline change using UAV-derived orthomosaics and digital surface models                                                                 | Drones; Geomorphic Change; Reef Islands; Structure-From-Motion; UAVs; Vulnerability                                                                | 20 | Drones                                          | 10.3390/drones3020044           |
| 452 | Kale M; Ataol M; Tekkanat I                                                                             | 2019 | Assessment of shoreline alterations using a digital shoreline analysis system a case study of changes in the Veilrmak delta in northern Turkey from 1953 to 2017 | DAM; Digital Shoreline Analysis System; Erosion Rate; Shoreline Changes; Turkey; Yeşilirmak Delta                                                  | 13 | Environmental Monitoring and Assessment         | 10.1007/s10661-019-7535-8       |
| 453 | Mishra M; Chand P; Pattnaik N; Kattel D; Panda G; Mohanti M; Baruah U; Chandniha S; Achary S; Mohanty T | 2019 | Response of long to short-term changes of the puri coastline of Odisha India to natural and anthropogenic factors a remote sensing and statistical assessment    | Endpoint Rate (EPR); Linear Regression Rate (LRR); Long-To Short-Term Changes; Remote Sensing; Shoreline Changes; Weighted Linear Regression (WLR) | 21 | Environmental Earth Sciences                    | 10.1007/s12665-019-8336-7       |
| 454 | Cunliffe A; Tanski G; Radosavljevic B; Palmer W; Sachs T; Lantuit H; Kerby J; Myers-Smith I             | 2019 | Rapid retreat of permafrost coastline observed with aerial drone photogrammetry                                                                                  | NA                                                                                                                                                 | 21 | Cryosphere                                      | 10.5194/tc-13-1513-2019         |
| 455 | Pillet V; Duvat V; Krien Y; Cécé R; Arnaud G; Pignon-Mussaoud C                                         | 2019 | Assessing the impacts of shoreline hardening on beach response to hurricanes saint-barthélemy Lesser Antilles                                                    | Human Disturbances; Hurricanes; Lesser Antilles; Shoreline Change; Small Islands                                                                   | 5  | Ocean and Coastal Management                    | 10.1016/j.ocecoaman.2019.03.021 |



|     |                                                                                                            |      |                                                                                                                                    |                                                                                                            |    |                                           |                            |
|-----|------------------------------------------------------------------------------------------------------------|------|------------------------------------------------------------------------------------------------------------------------------------|------------------------------------------------------------------------------------------------------------|----|-------------------------------------------|----------------------------|
| 456 | Kale S; Acarli D                                                                                           | 2019 | Shoreline change monitoring in Atikhisar reservoir by using remote sensing and geographic information system GIS                   | Atikhisar Reservoir; GIS; Monitoring; Remote Sensing; Shoreline Change                                     | 3  | Fresenius Environmental Bulletin          | NA                         |
| 457 | Huo S; Xing C                                                                                              | 2019 | Coastline change of Sanhe island in Tianjin using remote sensing techniques                                                        | NA                                                                                                         | 0  | Acta Geologica Sinica                     | 10.1111/1755-6724.14200    |
| 458 | Pugliano G; Robustelli U; Di L D; Mucerino L; Benassai G; Montella R                                       | 2019 | Statistical deviations in shoreline detection obtained with direct and remote observations                                         | Beach Survey; DGPS Measurements; Shoreline Position; Video Camera Observation                              | 12 | Journal of Marine Science and Engineering | 10.3390/jmse7050137        |
| 459 | Gómez-Pazo A; Pérez-Alberti A; Pérez X                                                                     | 2019 | Recent evolution 1956-2017 of Rodas beach on the Cíes islands Galicia NW Spain                                                     | Aerial Photographs; Coastal Erosion; DSAS; Galicia; GCD; Marine Protected Area                             | 10 | Journal of Marine Science and Engineering | 10.3390/jmse7050125        |
| 460 | De B W; Mao Y; Hagenaaars G; De V S; Slinger J; Vellinga T                                                 | 2019 | Mapping the sandy beach evolution around seaports at the scale of the African continent                                            | Coastal Erosion; Coastline Dynamics; Port Design; Satellite Imagery; Sediment Transport; Sustainable Ports | 11 | Journal of Marine Science and Engineering | 10.3390/jmse7050151        |
| 461 | Nithu R N; Gurugnanam B; Sudhakar V; Glitson F P                                                           | 2019 | Estuarine shoreline change analysis along the Ennore river mouth south east coast of India using digital shoreline analysis system | Accretion; DSAS; Ennore Estuary; Erosion; River Mouth Changes                                              | 11 | Geodesy and Geodynamics                   | 10.1016/j.geog.2019.04.002 |
| 462 | Barbaro G; Bombino G; Foti G; Borrello M; Puntorieri P                                                     | 2019 | Shoreline evolution near river mouth: case study of Petrace river Calabria Italy                                                   | EPR; NSM; Rainfall Regime; Sediment Transport; Shoreline Changes; WSE                                      | 15 | Regional Studies In Marine Science        | 10.1016/j.rsma.2019.100619 |
| 463 | Hein C; Fallon A; Rosen P; Hoagland P; Georgiou I; Fitzgerald D; Morris M; Baker S; Marino G; Fitzsimons G | 2019 | Shoreline dynamics along a developed river mouth barrier island multidecadal cycles of erosion and event-driven mitigation         | Beach Erosion; Coastal Adaptation; Developed Beach; Shoreline Change; Tidal-Inlet Dynamics                 | 8  | Frontiers In Earth Science                | 10.3389/feart.2019.00103   |

|     |                                                   |      |                                                                                                                                                                                         |                                                                                                      |    |                                                 |                               |
|-----|---------------------------------------------------|------|-----------------------------------------------------------------------------------------------------------------------------------------------------------------------------------------|------------------------------------------------------------------------------------------------------|----|-------------------------------------------------|-------------------------------|
| 464 | Basheer A K; Pandey A                             | 2019 | Shoreline morphology changes along the eastern coast of India Andhra Pradesh by using geo-spatial technology                                                                            | Digital Shoreline Analysis System; EPR; GIS; Shoreline Change                                        | 9  | Journal of Coastal Conservation                 | 10.1007/s11852-018-0662-5     |
| 465 | Joevivek V; Saravanan S; Chandrasekar N           | 2019 | Assessing the shoreline trend changes in southern tip of India                                                                                                                          | Beach; Deposition; Erosion; Sediment Drift; Shoreline Trend; Southern Tip of India                   | 4  | Journal of Coastal Conservation                 | 10.1007/s11852-018-0657-2     |
| 466 | Davies-Vollum K; Zhang Z; Agyekumhene A           | 2019 | Impacts of lagoon opening and implications for coastal management: case study from Muni Pomadze lagoon, Ghana                                                                           | Coastal Management; Ghana; Lagoon; Shoreline Change                                                  | 3  | Journal of Coastal Conservation                 | 10.1007/s11852-018-0658-1     |
| 467 | Griffiths D; House C; Rangel-Buitrago N; Thomas T | 2019 | An assessment of areal and transect-based historic shoreline changes in the context of coastal planning                                                                                 | Coastal Erosion; Coastal Management; Coastal Planning; Port Eynon; QGIS                              | 5  | Journal of Coastal Conservation                 | 10.1007/s11852-018-0661-6     |
| 468 | Westley K                                         | 2019 | Refining broadscale vulnerability assessment of coastal archaeological resources Lough Foyle northern Ireland                                                                           | Climate Change; Coastal Erosion; Coastal Vulnerability; Cultural Resource Management; Sea-Level Rise | 6  | Journal of Island and Coastal Archaeology       | 10.1080/15564894.2018.1435592 |
| 469 | Yulianto F; Suwarsono S; Maulana T; Khomarudin M  | 2019 | The dynamics of shoreline change analysis based on the integration of remote sensing and geographic information system GIS techniques in Pekalongan coastal area central Java Indonesia | Dynamics of Shoreline Change; GIS; Remote Sensing; Tidal Flood                                       | 4  | Journal of Degraded and Mining Lands Management | 10.15243/jdmlm.2019.063.1789  |
| 470 | Mafi-Gholami D; Baharlouiii M                     | 2019 | Monitoring longterm mangrove shoreline changes along the northern coasts of the Persian Gulf and the Oman sea                                                                           | Mangroves; Oman Sea; Persian Gulf; Progression and Regression; RS                                    | 15 | Emerging Science Journal                        | 10.28991/esj-2019-01172       |
| 471 | BalaSARaswathi P; Srinivasalu S                   | 2019 | Seasonal influence on Cuddalore shoreline change remote sensing GIS and statistical approach                                                                                            | End Point Rate; Linear Regression Rate; Meteorological Force; Seasonal Influence; Shoreline Change   | 0  | Mausam                                          | NA                            |

|     |                                                                                                                |      |                                                                                                                    |                                                                                                                  |    |                                                        |                                 |
|-----|----------------------------------------------------------------------------------------------------------------|------|--------------------------------------------------------------------------------------------------------------------|------------------------------------------------------------------------------------------------------------------|----|--------------------------------------------------------|---------------------------------|
| 472 | Bera R; Maiti R                                                                                                | 2019 | Quantitative analysis of erosion and accretion 1975-2017 using DSAS a study on Indian Sundarbans                   | Channel Stability; DSAS; Erosion; Keywords; Land Formation; Permanent Waterline                                  | 21 | Regional Studies In Marine Science                     | 10.1016/j.rsma.2019.100583      |
| 473 | Wang K                                                                                                         | 2019 | Evolution of Yellow river delta coastline based on remote sensing from 1976 to 2014 China                          | Coastline; Evolution; Morphological Evolution; Remote Sensing; Social-Ecological Challenge; Yellow River Delta   | 12 | Chinese Geographical Science                           | 10.1007/s11769-019-1023-5       |
| 474 | Thoai D; Dang A; Kim O N                                                                                       | 2019 | Analysis of coastline change in relation to meteorological conditions and human activities in Ca Mau Cape, Vietnam | Coastline Erosion; Human and Nature Interaction; Land-Use Change; Landsat Satellite; Meteorological Conditions   | 16 | Ocean and Coastal Management                           | 10.1016/j.ocecoaman.2019.01.007 |
| 475 | Aquino D S A; Stattegger K; Vital H; Schwarzer K                                                               | 2019 | Coastline change and offshore suspended sediment dynamics in a naturally developing delta Parnaíba delta ne Brazil | Coastal Erosion; Delta Switching; Naturally Developing Delta; Satellite Images; Sea-Level Rise; Shoreline Change | 7  | Marine Geology                                         | 10.1016/j.margeo.2018.12.013    |
| 476 | Gómez-Pazo A; Pérez-Alberti A; Trenhaile A                                                                     | 2019 | Recording interannual changes on a boulder beach in Galicia NW Spain using an Unmanned Aerial Vehicle              | Coastal Erosion; Digital Surface Model (DSM); Storm Response; Unmanned Aerial Vehicle (UAV)                      | 11 | Earth Surface Processes and Landforms                  | 10.1002/esp.4549                |
| 477 | Nugraha R; Syaharani L; Iska R; Mulyana D; Wahyudin Y; Purbani D; Jayawiguna H; Triyono T; Setiawan A; Fajar P | 2019 | The impact of land used changes on mangrove forest and shoreline dynamic in Muara Gembong Bekasi west Java         | NA                                                                                                               | 2  | IOP Conference Series: Earth and Environmental Science | 10.1088/1755-1315/241/1/012018  |
| 478 | Noujas V; Kankara R; Chenthamil S                                                                              | 2019 | Shoreline management plan for embayed beaches: A case study at Vengurla west coast of India                        | Bathymetry; Climate; Modelling; Shoreline Management Plan; Wave                                                  | 2  | Ocean and Coastal Management                           | 10.1016/j.ocecoaman.2019.01.001 |

|     |                                                                                    |      |                                                                                                                     |                                                                                                      |    |                                                                                                                                                          |                                    |
|-----|------------------------------------------------------------------------------------|------|---------------------------------------------------------------------------------------------------------------------|------------------------------------------------------------------------------------------------------|----|----------------------------------------------------------------------------------------------------------------------------------------------------------|------------------------------------|
| 479 | Wen S; Zhang F; Wang Z;<br>Li F; Jing X; Zhao J                                    | 2019 | Coastal erosion monitoring and<br>hazard degree assessment at<br>Penglai sandy coast based on re-<br>mote sensing   | NA                                                                                                   | 2  | IOP Conference Se-<br>ries: Earth and En-<br>vironmental Sci-<br>ence                                                                                    | 10.1088/1755-<br>1315/234/1/012014 |
| 480 | Orlando L; Ortega L;<br>Defeo O                                                    | 2019 | Multidecadal variability in<br>sandy beach area and the role of<br>climate forcing                                  | Beach Area; Climatic<br>Forcing; ENSO;<br>Erosion; Open-Ac-<br>cess Information;<br>Sea Level        | 15 | Estuarine, Coastal<br>and Shelf Science                                                                                                                  | 10.1016/j.ecss.2018.12.015         |
| 481 | Demir N; Bayram B; Şeker<br>D; Oy S; Ince A; Bozkurt S                             | 2019 | Advanced lake shoreline extrac-<br>tion approach by integration of<br>SAR image and Lidar data                      | Data Fusion; Remote<br>Sensing; SAR;<br>Shoreline Detection                                          | 9  | Marine Geodesy                                                                                                                                           | 10.1080/01490419.2019.158186<br>1  |
| 482 | Dominici D; Zollini S;<br>Alicandro M; Torre F;<br>Buscema P; Baiocchi V           | 2019 | High resolution satellite images<br>for instantaneous shoreline ex-<br>traction using new enhancement<br>algorithms | ACM; Coastline De-<br>tection; Enhance-<br>ment; Remote Sens-<br>ing; Satellite Image;<br>Worldview2 | 12 | Geosciences (Swit-<br>zerland)                                                                                                                           | 10.3390/geosciences9030123         |
| 483 | Spinosa A; Ziemba A;<br>Saponieri A; Navarro-<br>Sanchez V; Damiani L;<br>Serafy G | 2019 | Automatic extraction of shore-<br>line from satellite images a new<br>approach                                      | Coastal Monitoring;<br>Image Processing;<br>SAR Images; Senti-<br>nel-1; Shoreline Ex-<br>traction   | 4  | 2018 IEEE Interna-<br>tional Workshop<br>on Metrology For<br>The Sea; Learning<br>to Measure Sea<br>Health Parameters,<br>Metrosea 2018 -<br>Proceedings | 10.1109/MetroSea.2018.86578<br>64  |

|     |                                                         |      |                                                                                                                       |                                                                                                                                                |    |                                                                                                                                   |                                 |
|-----|---------------------------------------------------------|------|-----------------------------------------------------------------------------------------------------------------------|------------------------------------------------------------------------------------------------------------------------------------------------|----|-----------------------------------------------------------------------------------------------------------------------------------|---------------------------------|
| 484 | Nunziata F; Buono A; Migliaccio M; Benassai G; Luccio D | 2019 | Shoreline erosion of microtidal beaches examined with UAV and remote sensing techniques                               | Coastline; Remote Sensing; SAR; UAV Survey; VLOS                                                                                               | 4  | 2018 IEEE International Workshop on Metrology For The Sea; Learning to Measure Sea Health Parameters, Metrosea 2018 - Proceedings | 10.1109/MetroSea.2018.8657843   |
| 485 | Caudle T; Paine J; Andrews J; Saylam K                  | 2019 | Beach dune and nearshore analysis of southern Texas Gulf coast using Chiroptera Lidar and imaging system              | Beach Processes; Coastal Change; Remote Sensing; Sediment Volume; Shoreline Change                                                             | 1  | Journal of Coastal Research                                                                                                       | 10.2112/JCOASTRES-D-18-00069.1  |
| 486 | Hoang V; Tanaka H; Mitobe Y                             | 2019 | Longshore propagation erosion of beach in the vicinity of tsunami-induced concave shoreline                           | Analytical Solution; Concave Shoreline; Diffusion Coefficient; Erosion Propagation; Morphological Change; One-Line Model; River Mouth; Tsunami | 8  | Journal of Hydro-Environment Research                                                                                             | 10.1016/j.jher.2019.01.003      |
| 487 | Valderrama-Landeros L; Flores-De-Santiago F             | 2019 | Assessing coastal erosion and accretion trends along two contrasting sub-tropical rivers based on remote sensing data | Delta; Estuary; Mexico; Shoreline Change                                                                                                       | 16 | Ocean and Coastal Management                                                                                                      | 10.1016/j.ocecoaman.2018.12.006 |
| 488 | Kupilik M; Witmer F; Macleod E; Wang C; Ravens T        | 2019 | Gaussian process regression for Arctic coastal erosion forecasting                                                    | Arctic; Coastal Erosion; Gaussian Process (GP)                                                                                                 | 6  | IEEE Transactions on Geoscience and Remote Sensing                                                                                | 10.1109/TGRS.2018.2865429       |
| 489 | Ghosh A                                                 | 2019 | Monitoring estuarine morphodynamics through quantitative techniques and GIS: A case study in Sagar island India       | End Point Rate (EPR); Estuarine Equilibrium; Net Shoreline Movement (NSM); Shoreline Change Envelope (SCE); Wave Character                     | 2  | Journal of Coastal Conservation                                                                                                   | 10.1007/s11852-018-0643-8       |

|     |                                                                                                                 |      |                                                                                                                                    |                                                                                                              |    |                                                 |                                 |
|-----|-----------------------------------------------------------------------------------------------------------------|------|------------------------------------------------------------------------------------------------------------------------------------|--------------------------------------------------------------------------------------------------------------|----|-------------------------------------------------|---------------------------------|
| 490 | Ciritci D; Türk T                                                                                               | 2019 | Automatic detection of shoreline change by geographical information system GIS and remote sensing in the Göksu delta Turkey        | DSAS; GIS; Remote Sensing; Shoreline                                                                         | 14 | Journal of The Indian Society of Remote Sensing | 10.1007/s12524-019-00947-1      |
| 491 | Toure S; DIOP O; Kpalma K; Maiga A                                                                              | 2019 | Shoreline detection using optical remote sensing: A review                                                                         | Beach Monitoring; Coastline; Feature Extraction; Shoreline                                                   | 37 | ISPRS International Journal of Geo-Information  | 10.3390/ijgi8020075             |
| 492 | Kongeswaran T; Karikalan R                                                                                      | 2019 | Assessment of shoreline changes between Cuddalore and Nagapattinam coast east coast of Tamilnadu India using geospatial techniques | Accretion; DSAS; Erosion; Geospatial; LRR; Shoreline                                                         | 0  | Disaster Advances                               | NA                              |
| 493 | Vivek G; Goswami S; Samal R; Choudhury S                                                                        | 2019 | Monitoring of chilika lake mouth dynamics and quantifying rate of shoreline change using 30m multitemporal Landsat data            | NA                                                                                                           | 5  | Data In Brief                                   | 10.1016/j.dib.2018.12.082       |
| 494 | Dada O; Agbaje A; Adesina R; Asiwaju-Bello Y                                                                    | 2019 | Effect of coastal land use change on coastline dynamics along the Nigerian transgressive Mahin mud coast                           | Coastline Retreat; Human Activities; Land Use/ Land Cover; Nigerian Coastline; Transgressive Mahin Mud Coast | 23 | Ocean and Coastal Management                    | 10.1016/j.ocecoaman.2018.11.014 |
| 495 | Aguilar F; Fernandez-Luque I; Aguilar M; García L A; Vicianá A                                                  | 2019 | The integration of multisource remote sensing data for the modelling of shoreline change rates in a Mediterranean coastal sector   | NA                                                                                                           | 5  | International Journal of Remote Sensing         | 10.1080/01431161.2018.1524175   |
| 496 | Luccio D; Benassai G; Paola G; Mucerino L; Buono A; Roskopf C; Nunziata F; Migliaccio M; Urciuoli A; Montella R | 2019 | Shoreline rotation analysis of embayed beaches by means of in situ and remote surveys                                              | DGPS; Embayed Beaches; SAR; Shoreline Variation; Tyrrhenian Coast; UAV                                       | 18 | Sustainability (Switzerland)                    | 10.3390/su11030725              |

|     |                                                                    |      |                                                                                                                 |                                                                                    |    |                                                                                         |                                 |
|-----|--------------------------------------------------------------------|------|-----------------------------------------------------------------------------------------------------------------|------------------------------------------------------------------------------------|----|-----------------------------------------------------------------------------------------|---------------------------------|
| 497 | Li G; Sun G; Yao Y; Zhu B; Zhang Y                                 | 2019 | Spatiotemporal evolution of the sansha Bay coastline                                                            | Coastline; Remote Sensing; Sansha Bay; Spatio-Temporal Variation                   | 0  | Jilin Daxue Xuebao (Diqu Kexue Ban)/Journal of Jilin University (Earth Science Edition) | 10.13278/j.cnki.jjuese.20180134 |
| 498 | Duvat V; Pillet V; Volto N; Krien Y; Cécé R; Bernard D             | 2019 | High human influence on beach response to tropical cyclones in small islands Saintmartin island lesser Antilles | Lesser Antilles; Shoreline Change; Small Islands; Tropical Cyclones                | 13 | Geomorphology                                                                           | 10.1016/j.geomorph.2018.09.029  |
| 499 | NasSAR K; Mahmod W; Fath H; Masria A; Nadaoka K; Negm A            | 2019 | Shoreline change detection using DSAS technique: Case of north Sinai coast Egypt                                | DSAS; North Sinai Coast; Remote Sensing and GIS; Shoreline Change                  | 47 | Marine Georesources and Geotechnology                                                   | 10.1080/1064119X.2018.1448912   |
| 500 | Barik K; Annaduari R; Mohanty P; Mahendra R; Tripathy J; Mitra D   | 2019 | Statistical assessment of long-term shoreline changes along the Odisha coast                                    | DSAS; EPR; Erosion; LRR; Odisha Coast; Satellite Data]                             | 2  | Indian Journal of Geo-Marine Sciences                                                   | NA                              |
| 501 | Wicaksono A; Wicaksono P; Khakhim N; Farda N; Marfai M             | 2019 | Semiautomatic shoreline extraction using water index transformation on Landsat-8 OLI imagery in Jepara Regency  | Coastal Physical Typology; Geometric Accuracy; Jepara; Shoreline; Water Index      | 8  | Proceedings of Spie - The International Society For Optical Engineering                 | 10.1117/12.2540967              |
| 502 | Azatuhi H; Garegin T; Vahagn M; Shushanik A; Andrey M; Alexander K | 2019 | Lake Sevan shoreline change assessment using multitemporal Landsat images                                       | Lake Sevan; Multi-Temporal Landsat Images; Shoreline Change; Shoreline Delineation | 4  | Geography, Environment, Sustainability                                                  | 10.24057/2071-9388-2019-46      |
| 503 | Conti L                                                            | 2019 | Coastline changes near the Maranhão ponta da Madeira port complex Brazil                                        | Coastal Zone; Geo Data-Base; GIS; Remote Sensing; Shoreline Changes                | 1  | Journal of Integrated Coastal Zone Management                                           | 10.5894/n175                    |

|     |                                                     |      |                                                                                                                                                                                                                                                                 |                                                                                                         |   |                                               |                         |
|-----|-----------------------------------------------------|------|-----------------------------------------------------------------------------------------------------------------------------------------------------------------------------------------------------------------------------------------------------------------|---------------------------------------------------------------------------------------------------------|---|-----------------------------------------------|-------------------------|
| 504 | Prudêncio M; Amaro V; Scudelari A                   | 2019 | Coastal evolution analysis between the years 1984 and 2014 on a stretch of rio Grande do norte eastern coast northeast Brazil análise da evolução costeira entre os anos de 1984 e 2014 de trecho do litoral oriental do rio Grande do norte nordeste do brasil | DSAS; Equatorial Coastal Zone; Remote Sensing                                                           | 0 | Anuario Do Instituto De Geociencias           | 10.11137/2019_4_189_205 |
| 505 | Demir N; Bayram B; Seker D; Oy S; Bozkurt S; Ince A | 2019 | Analyzing the impact of an earthquake on the shoreline using SAR images as alternative data set                                                                                                                                                                 | Earthquake; LIDAR; Multispectral; SAR; Sentinel; Shoreline Detection                                    | 1 | Fresenius Environmental Bulletin              | NA                      |
| 506 | Vos K; Harley M; Splinter K; Turner I               | 2019 | Satellite-derived shorelines along the east coast of Australia between 1987 and 2019                                                                                                                                                                            | Coastal Monitoring; ENSO; Google Earth Engine; Satellite Imagery; Shoreline Change                      | 2 | Australasian Coasts and Ports 2019 Conference | NA                      |
| 507 | Lumiatti G; Carley J; Drummond C; Vos K             | 2019 | Use of emerging remote sensing technologies for measuring long-term shoreline change and coastal management                                                                                                                                                     | Beach Scraping; Coastal Management; Remote Sensing Technologies; Seawall End Effect; Shoreline Analysis | 2 | Australasian Coasts and Ports 2019 Conference | NA                      |
| 508 | Ozcan O                                             | 2019 | Multitemporal analysis of coastal dynamics by high-resolution reconstruction of topography using UAV's                                                                                                                                                          | Coastal Change; Multitemporal Analysis; Point Cloud; Shoreline; Silivri; Structure From Motion          | 4 | Fresenius Environmental Bulletin              | NA                      |
| 509 | Dalbosco A; Barletta R; Franco D                    | 2019 | Relation between the variations of the shoreline and the morphodynamic features of armação beach Santa Catarina island relação entre as variações da linha de costa e as características morfodinâmicas da praia da armação ilha de Santa Catarina              | Beach Morphodynamic; Shoreline Change; Wave Climate                                                     | 3 | Geociencias                                   | NA                      |



|     |                                          |      |                                                                                                                                                                                  |                                                                                                                 |   |                                                                                                                                       |                                          |
|-----|------------------------------------------|------|----------------------------------------------------------------------------------------------------------------------------------------------------------------------------------|-----------------------------------------------------------------------------------------------------------------|---|---------------------------------------------------------------------------------------------------------------------------------------|------------------------------------------|
| 510 | De A I; Gomes R; Gonçalves R; De A Q H   | 2019 | Evaluation of coastal erosion vulnerability index CVI for Piauí coastal zone Brazil estimativa do índice de vulnerabilidade à erosão costeira ivc para o litoral do Piauí Brasil | Litho-Structure; Morphotectonic; Remote Sensing                                                                 | 3 | Revista Brasileira De Geomorfologia                                                                                                   | 10.20502/rbg.v20i1.1260                  |
| 511 | Fabris M                                 | 2019 | Coastline evolution of the Po river delta Italy by archival multitemporal digital photogrammetry                                                                                 | Aerial Digital Photogrammetry; Archival Multi-Temporal Data; Coastline Changes; Land Subsidence; Po River Delta | 7 | Geomatics, Natural Hazards and Risk                                                                                                   | 10.1080/19475705.2018.1561528            |
| 512 | Kundu K; Halder P                        | 2019 | Geomorphological changes in Sundarbans delta using GIS and remote sensing data                                                                                                   | Accretion; Erosion; Remote Sensing and GIS; Shoreline Change; Sundarban                                         | 0 | Communications In Computer and Information Science                                                                                    | 10.1007/978-981-13-8581-0_4              |
| 513 | Gonçalves G; Santos S; Duarte D; Gomes J | 2019 | Monitoring local shoreline changes by integrating UAS's airborne Lidar historical images and orthophotos                                                                         | Coastline Erosion; Drones; DSAS; DSM; GIS; Local Change Rate                                                    | 3 | GISlam 2019 - Proceedings of The 5th International Conference on Geographical Information Systems Theory, Applications and Management | 10.5220/0007744101260134                 |
| 514 | Pantanahiran W                           | 2019 | Using remote sensing data for calculating the coastal erosion in southern Thailand                                                                                               | Coastal Erosion; Geographic Information System; Ikonos; Pleiades; Quick Bird; Remote Sensing; Worldview-2       | 2 | International Archives of The Photogrammetry, Remote Sensing and Spatial Information Sciences - ISPRS Archives                        | 10.5194/isprs-archives-XLII-3-W7-51-2019 |

|     |                                                                          |      |                                                                                                                                                 |                                                                                               |    |                                                        |                                |
|-----|--------------------------------------------------------------------------|------|-------------------------------------------------------------------------------------------------------------------------------------------------|-----------------------------------------------------------------------------------------------|----|--------------------------------------------------------|--------------------------------|
| 515 | Aliyuddin G; Damayanti A                                                 | 2019 | Coastline changes in Serang city Banten province                                                                                                | Abrasion; Accretion; Human FactorS; Natural FactorS                                           | 1  | IOP Conference Series: Earth and Environmental Science | 10.1088/1755-1315/248/1/012062 |
| 516 | Mat A A; Ahmad S F; Muhammad A; Wan K W; Mohd A M; Ahmad A; Bakhtiar J N | 2019 | Tracking coastal change over Kuala Terengganu using Landsat                                                                                     | Coastal Change; Coastal Erosion; Landsat; NDWI; Reclamation                                   | 0  | Lecture Notes In Networks and Systems                  | 10.1007/978-981-13-6031-2_13   |
| 517 | Irrgang A; Lantuit H; Gordon R; Piskor A; Manson G                       | 2019 | Impacts of past and future coastal changes on the Yukon coast threats for cultural sites infrastructure and travel routes                       | Arctic Coastal Dynamics; Inuvialuit Cultural Features; Permafrost Coast; Shoreline Projection | 20 | Arctic Science                                         | 10.1139/as-2017-0041           |
| 518 | Nagarajan S; Khamaru S; De W P                                           | 2019 | UAS-based 3D shoreline change detection of Jupiter inlet lighthouse Ona after hurricane Irma                                                    | NA                                                                                            | 8  | International Journal of Remote Sensing                | 10.1080/01431161.2019.1569792  |
| 519 | Do A; De V S; Stive M                                                    | 2019 | The estimation and evaluation of shoreline locations shoreline change rates and coastal volume changes derived from Landsat images              | Coastal Volume Changes; Landsat Images; Shoreline-Change Rate; Shoreline-Position Uncertainty | 12 | Journal of Coastal Research                            | 10.2112/JCOASTRES-D-18-00021.1 |
| 520 | Ali P; Jie D; Khan A; Sravanthi N; Rao L; Hao C                          | 2019 | Channel migration characteristics of the Yamuna river from 1954 to 2015 in the vicinity of Agra India a case study using remote sensing and GIS | Accretion; Channel Migration; Erosion; Flood Plain                                            | 9  | International Journal of River Basin Management        | 10.1080/15715124.2019.1566238  |
| 521 | Kar P; Mohanty P; Behera B                                               | 2019 | Shoreline change associated with coastal structures at Gopalpur port Odisha east coast of India                                                 | Beach Profile; Coastal Structures; Erosion/Accretion; Gopalpur Port; Shoreline Change         | 1  | Lecture Notes In Civil Engineering                     | 10.1007/978-981-13-3134-3_40   |
| 522 | Yadav A; Dodamani B; Dwarakish G                                         | 2019 | Study of dynamic changes through geoinformatics technique: A case study of Karwar coast west coast of India                                     | Beach Morphology; GIS; GPS; Remote Sensing; Shoreline Change                                  | 1  | Lecture Notes In Civil Engineering                     | 10.1007/978-981-13-3134-3_14   |

|      |                                                                                                                             |      |                                                                                                                                                      |                                                                                                                             |    |                                                    |                              |
|------|-----------------------------------------------------------------------------------------------------------------------------|------|------------------------------------------------------------------------------------------------------------------------------------------------------|-----------------------------------------------------------------------------------------------------------------------------|----|----------------------------------------------------|------------------------------|
| 523  | Isaev V; Koshurnikov A; Pogorelov A; Amangurov R; Podchasov O; Sergeev D; Buldovich S; Aleksyutina D; Grishakina E; Kioka A | 2019 | Cliff retreat of permafrost coast in southwest Baydaratskaya Bay Kara sea during 2005-2016                                                           | Baydaratskaya Bay; Coastal Retreat; Kara Sea; Permafrost Coast; Wind-Driven Ocean Wave                                      | 13 | Permafrost and Periglacial Processes               | 10.1002/ppp.1993             |
| 524  | Esmail M; Mahmod W; Fath H                                                                                                  | 2019 | Assessment and prediction of shoreline change using multitemporal satellite images and statistics: Case study of Damietta coast Egypt                | Damietta Port; End Point Rate (EPR); Iso Cluster Technique; Remote Sensing; Shoreline Change                                | 28 | Applied Ocean Research                             | 10.1016/j.apor.2018.11.009   |
| 525  | Escudero M; Silva R; Hesp P; Mendoza E                                                                                      | 2019 | Morphological evolution of the sandspit at Tortugueros beach, Mexico                                                                                 | Barrier Spit; Cyclic Behaviour; Laguna De Terminos; Mexico; Satellite Images; Tortugueros Beach Processes; Wave Energy Flux | 12 | Marine Geology                                     | 10.1016/j.margeo.2018.10.002 |
| 526  | Padmini Y; Rao P; Anusha C                                                                                                  | 2019 | Assessment of coastal erosion along the srikakulam district Andhra Pradesh state using satellite data of 1990-2000 and 2000-2016 time frames         | Coastal Erosion; Geographic Information System (GIS); Remote Sensing; Sea-Level Rise                                        | 0  | Springer Series In Geomechanics and Geoengineering | 10.1007/978-3-319-77276-9_50 |
| 527  | Kavya A; Bhavani A; Rao P; Chandrudu V                                                                                      | 2019 | Impact of land use/land cover and mangrove degradation on coastal erosion in Godavari delta region Andhra Pradesh - geospatial approach              | Accretion; Coastal Erosion; Mangrove Degradation; Uppada                                                                    | 1  | Springer Series In Geomechanics and Geoengineering | 10.1007/978-3-319-77276-9_37 |
| 1646 | Ataol M; Kale M; Tekkanat I                                                                                                 | 2019 | Assessment of the changes in shoreline using digital shoreline analysis system a case study of Kizilirmak delta in northern Turkey from 1951 to 2017 | Kizilirmak Delta; Kizilirmak River; Coastal Erosion; DSAS; Dam                                                              | 11 | Environmental Earth Sciences                       | 10.1007/s12665-019-8591-7    |
| 1648 | Yun K; Song Y                                                                                                               | 2019 | Quantitative estimation of shoreline changes using multi-sensor datasets: A case study for Banga-moeri beaches                                       | Shoreline Changes; Laser Scanning Data; Drone Image; Shorelines                                                             | 0  | Korean Journal of Remote Sensing                   | 10.7780/kjrs.2019.35.5.1.6   |

|      |                                                                |      |                                                                                                                                          |                                                                                                                                              |    |                                                 |                                 |
|------|----------------------------------------------------------------|------|------------------------------------------------------------------------------------------------------------------------------------------|----------------------------------------------------------------------------------------------------------------------------------------------|----|-------------------------------------------------|---------------------------------|
| 1651 | Cemali N; Benazzouz M; Ramoul S                                | 2019 | The contribution of sig in the quantification of the evolution of Skikdas coastline between 1960 and 2002 and the impact of developments | Coastal Erosion; GIS; Planning; Skikda                                                                                                       | 0  | Journal of Materials and Engineering Structures | NA                              |
| 1653 | Hong Z; Li X; Han Y; Zhang Y; Wang J; Zhou R; Hu K             | 2019 | Automatic subpixel coastline extraction based on spectral mixture analysis using eo1 hyperion data                                       | Coastline; Fully Constrained Least Squares; Spatial Attraction Algorithm; Urban Development; Eo-1 Data                                       | 10 | Frontiers of Earth Science                      | 10.1007/s11707-018-0702-5       |
| 1659 | Dhanalakshmi S; Kankara R; Selvan S                            | 2019 | Impact assessment of sea level rise over coastal landforms: A case study of Cuddalore coast southeast coast of India                     | Bruun Rule; Modified Bruun Rule; Shoreline Change Analysis; Digital Shoreline Analysis System (DSAS); Sea-Level Rise; Impact Assessment; GIS | 2  | Environmental Earth Sciences                    | 10.1007/s12665-019-8463-1       |
| 1673 | Pillet V; Duvat V; Krien Y; Cece R; Arnaud G; Pignou-Mussaud C | 2019 | Assessing the impacts of shoreline hardening on beach response to hurricanes saintbarthelemy Lesser Antilles                             | Small Islands; Hurricanes; Shoreline Change; Human Disturbances; Lesser Antilles                                                             | 5  | Ocean & Coastal Management                      | 10.1016/j.ocecoaman.2019.03.021 |
| 1675 | Gomez-Pazo A; Perez-Alberti A; Perez X                         | 2019 | Recent evolution 1956-2017 of rodas beach on the Cies islands Galicia NW Spain                                                           | Coastal Erosion; DSAS; Gcd; Aerial Photographs; Marine Protected Area; Galicia                                                               | 10 | Journal of Marine Science and Engineering       | 10.3390/jmse7050125             |
| 1687 | Da S A; Stattegger K; Vital H; Schwarzer K                     | 2019 | Coastline change and offshore suspended sediment dynamics in a naturally developing delta Parnaiba delta NE Brazil                       | Naturally Developing Delta; Delta Switching; Shoreline Change; Coastal Erosion; Satellite Images; Sea-Level Rise                             | 5  | Marine Geology                                  | 10.1016/j.margeo.2018.12.013    |
| 1693 | Ciritci D; Turk T                                              | 2019 | Automatic detection of shoreline change by geographical information system GIS and remote sensing in the Goksu delta Turkey              | DSAS; GIS; Remote Sensing; Shoreline                                                                                                         | 12 | Journal of The Indian Society of Remote Sensing | 10.1007/s12524-019-00947-1      |

|      |                                                            |      |                                                                                                                                |                                                                                                                      |    |                                                                                                           |                                 |
|------|------------------------------------------------------------|------|--------------------------------------------------------------------------------------------------------------------------------|----------------------------------------------------------------------------------------------------------------------|----|-----------------------------------------------------------------------------------------------------------|---------------------------------|
| 1695 | Vivek G; Goswami S; Samal R; Choudhury S                   | 2019 | Monitoring of chilika lake mouth dynamics and quantifying rate of shoreline change using 30 m multitemporal Landsat data       | NA                                                                                                                   | 5  | Data In Brief                                                                                             | 10.1016/j.dib.2018.12.082       |
| 1704 | Lubczonek J; Lacka M; Zaniewicz G                          | 2019 | Analysis of the accuracy of shoreline mapping in inland navigational charts inland Enc using photogrammetric and SONAR images  | Photogrammetry; Navigation Chart; Hydrography; Side Scan Sonar; Accuracy Assessment; Mapping                         | 0  | Scientific Journals of The Maritime University of Szczecin-Zeszyty Naukowe Akademii Morskiej W Szczecinie | 10.17402/335                    |
| 1707 | Marques H; Goncalves R; Araujo A; Pereira P; Queiroz H     | 2019 | Shoreline monitoring by GNSS-PPP aiming to attendance the law 14.258/2010 from pernambuco state Brazil                         | Gnss Positioning; Shoreline; Integrated Coastal Zone Management                                                      | 2  | Boletim De Ciencias Geodesicas                                                                            | 10.1590/s1982-21702019000200012 |
| 1716 | De A I; Gomes E; Goncalves R; Queiroz H                    | 2019 | Evaluation of coastal erosion vulnerability index CVI for piaui coastal zone Brazil                                            | Morphotectonic; Lithostructure; Remote Sensing                                                                       | 0  | Revista Brasileira De Geomorfologia                                                                       | 10.20502/rbg.v20i1.1260         |
| 228  | Sokolewicz M; Bergsma L; Schemmekes L; Nguyen H; Boersen S | 2020 | Use of remote sensing techniques and numerical modelling to predict coastal erosion in Vietnam                                 | Coastal Erosion; Profile Evolution Modelling; Remote Sensing; Satellite-Derived Shorelines; Typhoon Modelling        | 0  | Proceedings of The Coastal Engineering Conference                                                         | NA                              |
| 229  | Isha I; Adib M                                             | 2020 | Application of geospatial information system GIS using digital shoreline analysis system DSAS in determining shoreline changes | NA                                                                                                                   | 1  | IOP Conference Series: Earth and Environmental Science                                                    | 10.1088/1755-1315/616/1/012029  |
| 230  | Misra A; Ramakrishnan B                                    | 2020 | Assessment of coastal geomorphological changes using multitemporal satellite-derived bathymetry                                | Geomorphology; Landsat 8 Oli; Multi-Temporal; Near-Shore Bathymetry; Optical Remote Sensing; Support Vector Machines | 10 | Continental Shelf Research                                                                                | 10.1016/j.csr.2020.104213       |

|     |                                                                    |      |                                                                                                                                                  |                                                                                                          |   |                                                                                                                                                                                                                           |                                  |
|-----|--------------------------------------------------------------------|------|--------------------------------------------------------------------------------------------------------------------------------------------------|----------------------------------------------------------------------------------------------------------|---|---------------------------------------------------------------------------------------------------------------------------------------------------------------------------------------------------------------------------|----------------------------------|
| 231 | Nguyen Q; Takewaka S                                               | 2020 | Land subsidence and its effects on coastal erosion in the Nam Dinh coast Vietnam                                                                 | Bruun Rule; Din-SAR; Erosion; Land Subsidence; Nam Dinh Coast; Shore-line Change Rates                   | 7 | Continental Shelf Research                                                                                                                                                                                                | 10.1016/j.csr.2020.104227        |
| 232 | Liu J; Huang R; Yu K; Zou B                                        | 2020 | How limesand islands in the south China sea have responded to global warming over the last 30years evidence from satellite remote sensing images | Areal Changes; Coral Reefs; Global Warming; Lime-Sand Islands; Satellite Image Analysis; South China Sea | 1 | Geomorphology                                                                                                                                                                                                             | 10.1016/j.geomorph.2020.107423   |
| 233 | Anwar S; Purba N; Yuniarti Y; Subiyanto S                          | 2020 | Coastal vulnerability based on oceanographic and ecosystem parameters on the north and south coast of west Java                                  | Currents; Global Warming; Mangrove; Wave; West Java Coast                                                | 0 | Proceeding - Agers 2020: IEEE Asia-Pacific Conference on Geoscience, Electronics and Remote Sensing Technology: Understanding The Interaction of Land, Ocean and Atmosphere: Disaster Mitigation and Regional Resillience | 10.1109/AG-ERS51788.2020.9452761 |
| 234 | Cuttler M; Vos K; Branson P; Hansen J; O'Leary M; Browne N; Lowe R | 2020 | Interannual response of reef islands to climatedriven variations in water level and wave climate                                                 | Coastsat; ENSO; Reef Islands; Satellite-Derived Shorelines; Shoreline Variability                        | 2 | Remote Sensing                                                                                                                                                                                                            | 10.3390/rs12244089               |

|     |                                                      |      |                                                                                                                                                                                                                                                       |                                                                                             |   |                                                                                     |                                   |
|-----|------------------------------------------------------|------|-------------------------------------------------------------------------------------------------------------------------------------------------------------------------------------------------------------------------------------------------------|---------------------------------------------------------------------------------------------|---|-------------------------------------------------------------------------------------|-----------------------------------|
| 235 | López S                                              | 2020 | Anthropic effects on the geomorphology and morphodynamics of the coastal zone of La Paz lagoon Baja California Sur Mexico efecto antrópico en la geomorfología y morfodinámica de la franja costera de la laguna de la paz baja California sur méxico | Erosion; Geomorphology; Morphodynamics; Remodeling; Urban Area                              | 0 | Investigaciones Geograficas                                                         | 10.14350/RIG.60084                |
| 236 | Flores P; Siringan F                                 | 2020 | Shoreline change in response to the construction of a flood Canal in Jaro Iloilo city Philippines                                                                                                                                                     | Historical Maps; Jaro Floodway; Landsat; MNDWI                                              | 1 | 2020 IEEE India Geoscience and Remote Sensing Symposium, Ingarss 2020 - Proceedings | 10.1109/InGARSS48198.2020.9358962 |
| 237 | Flores A; Méndez D; Gallardo E; Santana J; Linares A | 2020 | Morphodynamics of the northern coasts of the Veracruz state Mexico trends over the past four decades 1973-2017 morfodinámica de las costas septentrionales del estado de veracruz méxico tendencias en las últimas cuatro décadas 1973-2017           | Coastal Morphodynamics; End Point Rate; Net Shoreline Movement; Progradation and Regression | 0 | Investigaciones Geograficas                                                         | 10.14350/RIG.60155                |
| 238 | Ezzeldin M; Rageh O; Saad M                          | 2020 | Assessment impact of the Damietta harbour Egypt and its deep navigation channel on adjacent shorelines                                                                                                                                                | Damietta Harbour; DSAS; Navigation Channel; Remote Sensing; Shoreline                       | 0 | Journal of Integrated Coastal Zone Management                                       | 10.5894/rgci-n338                 |
| 239 | El-Hadidy S                                          | 2020 | Monitoring shoreline changes and aeolian sand encroachment Nasser lake Egypt using remote sensing and GIS techniques                                                                                                                                  | Encroachment; Erosion/Accretion; Monitoring Sand; NDWI; Remote Sensing; Shoreline Changes   | 1 | Arabian Journal of Geosciences                                                      | 10.1007/s12517-020-06229-2        |
| 240 | Liu C; Chang J; Chen M; Zhang T                      | 2020 | Dynamic monitoring and its influencing factors analysis of coastline in the Laizhou Bay since 1985                                                                                                                                                    | Coastline; Dynamic Monitoring; Influencing Factors; Laizhou Bay; Remote Sensing             | 1 | Journal of Coastal Research                                                         | 10.2112/JCR-SI105-004.1           |

|     |                                                                                                                       |      |                                                                                                                            |                                                                                                                       |   |                                     |                                |
|-----|-----------------------------------------------------------------------------------------------------------------------|------|----------------------------------------------------------------------------------------------------------------------------|-----------------------------------------------------------------------------------------------------------------------|---|-------------------------------------|--------------------------------|
| 241 | Franco-Ochoa C;<br>Zambrano-Medina Y;<br>Plata-Rocha W; Monjardín-Armenta S; Rodríguez-Cueto Y; Escudero M; Mendoza E | 2020 | Longterm analysis of wave climate and shoreline change along the Gulf of California                                        | Climate Change;<br>Gulf of California;<br>Shoreline Change;<br>Wave Climate                                           | 4 | Applied Sciences (Switzerland)      | 10.3390/app10238719            |
| 242 | Galvez D; Papenmeier S; Hass H; Bartholomae A; Fofonova V; Wiltshire K                                                | 2020 | Detecting shifts of submarine sediment boundaries using Sidescan mosaics and GIS analyses                                  | Change Detection;<br>GIS; Lag Deposits;<br>Seafloor-Mapping;<br>Sediment Shifts;<br>Sedimentology;<br>Side-Scan Sonar | 5 | Marine Geology                      | 10.1016/j.margeo.2020.106343   |
| 243 | Zhao Z; Mitchell N; Quartau R; Ramalho R; Rusu L                                                                      | 2020 | Coastal erosion rates of Lava deltas around oceanic islands                                                                | Central Azores Islands; Coastal Erosion; Lava Delta; Near-Shore Platform; Oceanic Islands; Wave Erosion               | 4 | Geomorphology                       | 10.1016/j.geomorph.2020.107410 |
| 244 | Masria A; El-Adawy A; SARhan T                                                                                        | 2020 | A holistic evaluation of human-induced lulcc and shoreline dynamics of Elburullus lagoon through remote sensing techniques | El-Burullus; Coastal Zone; GIS; Land Use; Remote Sensing; Shoreline                                                   | 2 | Innovative Infrastructure Solutions | 10.1007/s41062-020-00331-w     |
| 245 | Appeaning A K; Brempong E; Jayson-Quashigah P                                                                         | 2020 | Assessment of the dynamics of the Volta river estuary shorelines in Ghana                                                  | Coastal Erosion; Disaster Risk; Shoreline Change; Volta Estuary; Vulnerability                                        | 3 | Geoenvironmental Disasters          | 10.1186/s40677-020-00151-1     |
| 246 | Sriyana I; Niyomukiza J; Sangkawati S; Parahyang-SARi S                                                               | 2020 | Determination of the original coastline on Semarang city and Demak district using remote sensing approach                  | NA                                                                                                                    | 0 | E3S Web of Conferences              | 10.1051/E3Sconf/202020204001   |
| 247 | Khadijah K; SARaswati R; Wibowo A                                                                                     | 2020 | Coastline changes on the coast of Cirebon using Landsat                                                                    | NA                                                                                                                    | 0 | E3S Web of Conferences              | 10.1051/E3Sconf/202020215016   |
| 248 | Ribas F; Simarro G; Arriaga J; Luque P                                                                                | 2020 | Automatic shoreline detection from video images by combining information from different methods                            | Coastal Regions; Remote Sensing; Shoreline Detection; Signal Filtering; Video Monitoring; Weighted Combination        | 4 | Remote Sensing                      | 10.3390/rs12223717             |



|     |                                                                            |      |                                                                                                                                              |                                                                                                                                              |   |                             |                                |
|-----|----------------------------------------------------------------------------|------|----------------------------------------------------------------------------------------------------------------------------------------------|----------------------------------------------------------------------------------------------------------------------------------------------|---|-----------------------------|--------------------------------|
| 249 | Wu Y; Wang S; Yang J; Wu S; You H; Wang Y                                  | 2020 | Impact of land use on coastline change of island cities: a case of Zhoushan island China                                                     | China; Coastline; Islands; Land Use; Remote Sensing; Zhoushan Island                                                                         | 1 | Island Studies Journal      | 10.24043/isj.125               |
| 250 | Blasco J; Serrano-Cañadas E; Sánchez-Fernández M; Gómez-Lende M; Redweik P | 2020 | Application of multiple geomatic techniques for coastline retreat analysis the case of Gerra beach cantabrian coast Spain                    | Coastal Geomorphology; Coastal Process; Geomatic Techniques; Monitoring; Shoreline Change                                                    | 3 | Remote Sensing              | 10.3390/rs12213669             |
| 251 | Jaramillo C; Sanchez-Garcia E; Jara M; González M; Palomar-Vazquez J       | 2020 | Subpixel satellite-derived shorelines as valuable data for equilibrium shoreline evolution models                                            | Coastal Morphology; Cross-Shore Processes; Model Calibration; Subpixel Precision                                                             | 3 | Journal of Coastal Research | 10.2112/JCOASTRES-D-20-00016.1 |
| 252 | Waghmare S; Hanamgond P; Mitra D; Koti B; Shinde P                         | 2020 | Application of remote sensing and GIS techniques to study sediment movement along Harwada beach Uttar Kannada west coast of India            | Beach; DSAS Model; Karwar; Morphology; Sentinel 2                                                                                            | 0 | Journal of Coastal Research | 10.2112/JCOASTRES-D-19-00170.1 |
| 253 | Li H; Huang C; Liu Q; Liu G                                                | 2020 | Accretion-erosion dynamics of the Yellow river delta and the relationships with runoff and sediment from 1976 to 2018                        | Accretion–Erosion Area; Coastline; Google Earth Engine; Landsat; Water-Sediment Regulation; YRD                                              | 1 | Water (Switzerland)         | 10.3390/w12112992              |
| 254 | Akay S; Özcan O; Sanli F; Görüm T; Sen L; Bayram B                         | 2020 | UAV-based evaluation of morphological changes induced by extreme rainfall events in meandering rivers                                        | NA                                                                                                                                           | 3 | Plos One                    | 10.1371/journal.pone.0241293   |
| 255 | Mcclenachan G; Donnelly M; Shaffer M; Sacks P; Walters L                   | 2020 | Does size matter quantifying the cumulative impact of small-scale living shoreline and oyster reef restoration projects on shoreline erosion | Florida; Geographic Information System; Indian River Lagoon; Mangrove; Monitoring; Oyster; Restoration; Shoreline Erosion; Universal Metrics | 6 | Restoration Ecology         | 10.1111/rec.13235              |

|     |                                                                                  |      |                                                                                                                                          |                                                                                                            |    |                                                        |                                |
|-----|----------------------------------------------------------------------------------|------|------------------------------------------------------------------------------------------------------------------------------------------|------------------------------------------------------------------------------------------------------------|----|--------------------------------------------------------|--------------------------------|
| 256 | Inaku D; Nurdin N; Satari D                                                      | 2020 | The dynamics of shoreline changes concerning the existence of mangrove in Takalar Regency                                                | NA                                                                                                         | 0  | IOP Conference Series: Earth and Environmental Science | 10.1088/1755-1315/575/1/012215 |
| 257 | Tian H; Xu K; Goes J; Liu Q; Do R G H; Yang M                                    | 2020 | Shoreline changes along the coast of mainland China time to pause and reflect                                                            | China; Landsat; Remote Sensing; Shoreline Change                                                           | 3  | ISPRS International Journal of Geo-Information         | 10.3390/ijgi9100572            |
| 258 | Al-Zubieri A; Ghandour I; Bantan R; Basaham A                                    | 2020 | Shoreline evolution between al Lith and Ras Mahsin on the red sea coast Saudi Arabia using GIS and DSAS techniques                       | DSAS; Endpoint Rate; Linear Regression Rate; Red Sea; Shoreline Evolution                                  | 2  | Journal of The Indian Society of Remote Sensing        | 10.1007/s12524-020-01169-6     |
| 259 | Veettil B; Van D; Quang N                                                        | 2020 | Biodiversity and nature conservation in island ecosystems spatiotemporal changes in Socotra Archipelago, Yemen                           | Endemic Species; Grassland Remote Sensing; Grazing; Island Biodiversity; Plant Invasion; Urban Settlements | 1  | Journal of Coastal Conservation                        | 10.1007/s11852-020-00774-4     |
| 260 | Ates A; Yilmaz O; Gulgen F                                                       | 2020 | Using remote sensing to calculate floating photovoltaic technical potential of a dams surface                                            | Evaporation; Floating Photovoltaic; Remote Sensing; Solar Energy; Supervised Classification                | 3  | Sustainable Energy Technologies and Assessments        | 10.1016/j.seta.2020.100799     |
| 261 | Benkhatab F; Hakkou M; Bagdanavičiūtė I; Mrini A; Zagaoui H; Rhinane H; Maanan M | 2020 | Spatiotemporal analysis of the shoreline change rate using automatic computation and geospatial tools along the Tetouan coast in Morocco | Anthropogenic Impacts; Coastal Hazard; Digital Shoreline Analysis System (DSAS); Shoreline Changes         | 8  | Natural Hazards                                        | 10.1007/s11069-020-04179-2     |
| 262 | Yue H; Li Y; Qian J; Liu Y                                                       | 2020 | A new accuracy evaluation method for water body extraction                                                                               | NA                                                                                                         | 12 | International Journal of Remote Sensing                | 10.1080/01431161.2020.1755740  |
| 263 | Warnasuriya T; Kumara M; Gunasekara S; Gunaalan K; Jayathilaka R                 | 2020 | An improved method to detect shoreline changes in small-scale beaches using Google Earth Pro                                             | DSAS; GIS; Google Earth Pro; Remote Sensing; Small-Scale Beach                                             | 1  | Marine Geodesy                                         | 10.1080/01490419.2020.1822478  |

|     |                                                                                                                                                 |      |                                                                                                                                        |                                                                                                                   |    |                                                                                            |                                  |
|-----|-------------------------------------------------------------------------------------------------------------------------------------------------|------|----------------------------------------------------------------------------------------------------------------------------------------|-------------------------------------------------------------------------------------------------------------------|----|--------------------------------------------------------------------------------------------|----------------------------------|
| 264 | Fauzia A; Syamsidik S; Syahreza S                                                                                                               | 2020 | Spatiotemporal shoreline changes analysis based on Landsat satellite images in Lahewa beach of north Nias due to tectonics 2005        | NA                                                                                                                | 0  | IOP Conference Series: Materials Science and Engineering                                   | 10.1088/1757-899X/933/1/012055   |
| 265 | Briceno-De-Urbaneja I; Ugalde-Peralta R; Sanchez-Garcia E; Pardo-Pascual J; Palomar-Vazquez J; Perez-Martinez W; Vidal-Paez P; Parrao-Barrera M | 2020 | Intra-annual coastal dynamics through remote sensors and morphosedimentary patterns Reñaca beach and Concon Bay Central Chile          | Optical Remote Sensing; Shoreline Detection                                                                       | 0  | International Geoscience and Remote Sensing Symposium (IGARSS)                             | 10.1109/IGARSS39084.2020.9323961 |
| 266 | Carvalho R; Kennedy D; Niyazi Y; Leach C; Konlechner T; Ierodiaconou D                                                                          | 2020 | Structure-from-motion photogrammetry analysis of historical aerial photography determining beach volumetric change over decadal scales | Aerial Photogrammetry; Coastal Change; Port Fairy; SFM-Mvs Photogrammetry; Volumetric Comparison; Warmnambool     | 8  | Earth Surface Processes and Landforms                                                      | 10.1002/esp.4911                 |
| 267 | Chen D; Li X; Saito Y; Liu J; Duan Y; Liu S; Zhang L                                                                                            | 2020 | Recent evolution of the Irrawaddy Ayeyarwady delta and the impacts of anthropogenic activities: A review and remote sensing survey     | Coastal Geomorphology; Delta Evolution; Fluvial Geomorphology; Human Activities; Remote Sensing; Shoreline Change | 15 | Geomorphology                                                                              | 10.1016/j.geomorph.2020.107231   |
| 268 | Bartsch A; Ley S; Nitze I; Pointner G; Vieira G                                                                                                 | 2020 | Feasibility study for the application of synthetic aperture radar for coastal erosion rate quantification across the Arctic            | Arctic; Coast; Erosion; Permafrost; Radar; SAR                                                                    | 1  | Frontiers In Environmental Science                                                         | 10.3389/fenvs.2020.00143         |
| 269 | Li P; Pu S; Li Z; Wang H                                                                                                                        | 2020 | Coastline change monitoring of Jiaozhou Bay from multi-source SAR and Optical Remote Sensing images since 2000-2000                    | Change Analysis; Coastline Change Detection; Jiaozhou Bay; Optical Remote Sensing; SAR Remote Sensing             | 1  | Wuhan Daxue Xuebao (Xinxi Kexue Ban)/Geomatics and Information Science of Wuhan University | 10.13203/j.whuGIS20180483        |

|     |                                                                                                              |      |                                                                                                                                                      |                                                                                                                 |    |                                    |                                  |
|-----|--------------------------------------------------------------------------------------------------------------|------|------------------------------------------------------------------------------------------------------------------------------------------------------|-----------------------------------------------------------------------------------------------------------------|----|------------------------------------|----------------------------------|
| 270 | Zagórski P; Jarosz K; Superson J                                                                             | 2020 | Integrated assessment of shoreline change along the calypsostranda Svalbard from remote sensing field survey and GIS                                 | Coastal Change; Coastal Erosion; Coastal Morphodynamics; DSAS; Shoreline Hazard Map; Svalbard                   | 10 | Marine Geodesy                     | 10.1080/01490419.2020.1715516    |
| 271 | Sabuncu A                                                                                                    | 2020 | Monitoring shoreline change of Acigol and Burdur lakes in Turkey over 44 years using remote sensing and GIS approaches                               | Acigöl Lake; Burdur Lake; MNDWI; NDWI; OBIA Classification; SVM Classification                                  | 1  | Fresenius Environmental Bulletin   | NA                               |
| 272 | Crawford T; Islam M; Rahman M; Paul B; Curtis S; Miah M; Islam M                                             | 2020 | Coastal erosion and human perceptions of revetment protection in the lower Meghna estuary of Bangladesh                                              | Bangladesh Delta; Coastal Erosion; Human Dimensions; Revetment; Shoreline Protection                            | 3  | Remote Sensing                     | 10.3390/RS12183108               |
| 273 | Bougherira A; Ghodbani T; Kouti A                                                                            | 2020 | Contemporary geomorphic evolution of Falcon Cape sandy coastline Oran Algeria geographical information system GIS-based approach                     | Anthropogenic Pressure; Falcon Cape; Geomorphic Evolution; GIS; Sandy Coastline                                 | 1  | Arabian Journal of Geosciences     | 10.1007/s12517-020-05983-7       |
| 274 | Veettil B; Costi J; Marques W; Tran X; Quang N; Van D; Hoai P                                                | 2020 | Coastal environmental changes in southeast Asia: A study from Quang Nam province, Central Vietnam                                                    | Coastal Remote Sensing; Coastal Vegetation; Sea Level Rise; Shoreline Erosion; Vietnamese Coastline             | 3  | Regional Studies In Marine Science | 10.1016/j.rsma.2020.101420       |
| 275 | Velsamy S; Balasubramaniyan G; Swaminathan B; Kesavan D                                                      | 2020 | Multidecadal shoreline change analysis in coast of Thiruchendur Taluk Thoothukudi district Tamil Nadu India using remote sensing and DSAS techniques | Accretion; DSAS; Erosion; LRR                                                                                   | 3  | Arabian Journal of Geosciences     | 10.1007/s12517-020-05800-1       |
| 276 | Sánchez-García E; Palomar-Vázquez J; Pardo-Pascual J; Almonacid-Caballer J; Cabezas-Rabadán C; Gómez-Pujol L | 2020 | An efficient protocol for accurate and massive shoreline definition from mid-resolution satellite imagery                                            | Beach Changes; Coastal Monitoring; Landsat 8; Sentinel 2; Shorex; Sub-Pixel Shoreline Mapping; Video-Monitoring | 12 | Coastal Engineering                | 10.1016/j.coastaleng.2020.103732 |

|     |                                                          |      |                                                                                                                                                                                   |                                                                                                                                          |   |                                                                                                                |                                               |
|-----|----------------------------------------------------------|------|-----------------------------------------------------------------------------------------------------------------------------------------------------------------------------------|------------------------------------------------------------------------------------------------------------------------------------------|---|----------------------------------------------------------------------------------------------------------------|-----------------------------------------------|
| 277 | Dereli M; Tercan E                                       | 2020 | Assessment of shoreline changes using historical satellite images and geospatial analysis along the lake Salda in Turkey                                                          | DSAS; GIS; Lake Salda; Landsat; Shoreline Change; Spatial Analysis                                                                       | 8 | Earth Science Informatics                                                                                      | 10.1007/s12145-020-00460-x                    |
| 278 | Bogardus R; Maio C; Mason O; Buzard R; Mahoney A; De W C | 2020 | Midwinter breakout of landfast sea ice and major storm leads to significant ice push event along Chukchi sea coastline                                                            | Arctic; Cape Espenberg; Climate Change; Erosion; IVU; Kotzebue Sound; Sea Ice; Storm Surge                                               | 1 | Frontiers In Earth Science                                                                                     | 10.3389/feart.2020.00344                      |
| 279 | Shandi Z; Helali H                                       | 2020 | Investigation of 2019 rainfall effects on Urmia lake surface and extraction of lake shoreline changes and comparison with the previous decade using remote sensing images and GIS | Change Detection; GIS; Landsat; NDWI Index; Rainfall; Remote Sensing; Shoreline; Urmia Lake                                              | 1 | International Archives of The Photogrammetry, Remote Sensing and Spatial Information Sciences - ISPRS Archives | 10.5194/isprs-archives-XLIII-B3-2020-759-2020 |
| 280 | Aldogom D; Albeshier S; Mansoori S; Nazzal T             | 2020 | Assessing coastal land dynamics along UAE shoreline using GIS and remote sensing techniques                                                                                       | and End Point Rate (EPR); Geographic Information System (GIS); Linear Regression Rate (LRR); Net Shoreline Movement(NSM); Remote Sensing | 2 | IOP Conference Series: Earth and Environmental Science                                                         | 10.1088/1755-1315/540/1/012031                |
| 281 | Nor N; Tahar K; Suprijo T; Sulaiman S                    | 2020 | Shoreline changes analysis along the coast of Kuala Terengganu Malaysia using DSAS                                                                                                | Accretion; DSAS; Erosion; Landsat; LRR; Shoreline Changes                                                                                | 0 | 2020 11th IEEE Control and System Graduate Research Colloquium, Icsgrc 2020 - Proceedings                      | 10.1109/ICSGRC49013.2020.9232586              |

|     |                                                                               |      |                                                                                                                            |                                                                                                                         |    |                                                               |                            |
|-----|-------------------------------------------------------------------------------|------|----------------------------------------------------------------------------------------------------------------------------|-------------------------------------------------------------------------------------------------------------------------|----|---------------------------------------------------------------|----------------------------|
| 282 | Mondal I; Thakur S; Juliev M; Bandyopadhyay J; De T                           | 2020 | Spatiotemporal modelling of shoreline migration in Sagar island west Bengal, India                                         | Accretion; Endpoint Rate; Erosion; Linear Regression; Remote Sensing and GIS; Shoreline                                 | 6  | Journal of Coastal Conservation                               | 10.1007/s11852-020-00768-2 |
| 283 | Thirumurthy S; Jayanthi M; Samynathan M; Duraisamy M; Nagaraj G; Anbazhahan N | 2020 | Land and human resources vulnerability to the impact of climate change in ecologically important coastal regions           | Coastline Change; Digital Shoreline Analysis System (DSAS); Fishers; Geospatial; Sea-Level Increase; Vulnerable Regions | 0  | Journal of Coastal Conservation                               | 10.1007/s11852-020-00766-4 |
| 284 | Godwyn-Paulson P; Jonathan M; Hernandez F; MuthUSAnkar G; Lakshumanan C       | 2020 | Coastline variability of several Latin American cities alongside Pacific ocean due to the unusual sea swell events of 2015 | Coastal Cities; DSAS; El Niño/Southern Oscillation; Inundation; Latin American Countries; Sea Swell 2015                | 1  | Environmental Monitoring and Assessment                       | 10.1007/s10661-020-08469-x |
| 285 | Kumar L; Afzal M; Afzal M                                                     | 2020 | Mapping shoreline change using machine learning: A case study from the eastern Indian coast                                | Artificial Neural Network; Edge Detection; Image Processing; Machine Learning; Shoreline Change                         | 2  | Acta Geophysica                                               | 10.1007/s11600-020-00454-9 |
| 286 | Ratnayakage S; Sasaki J; Suzuki T; Jayaratne R; Ranawaka R; Pathmasiri S      | 2020 | On the status and mechanisms of coastal erosion in Marawila beach Sri Lanka                                                | Beach Nourishment; Coastline Change; Developing Country; Sand Mining; Wave Climate Change                               | 0  | Natural Hazards                                               | 10.1007/s11069-020-04034-4 |
| 287 | Ciritci D; Türk T                                                             | 2020 | Assessment of the Kalman filter-based future shoreline prediction method                                                   | GIS; Kalman Filter; Remote Sensing; Shoreline Change Analysis; Shoreline Prediction                                     | 2  | International Journal of Environmental Science and Technology | 10.1007/s13762-020-02733-w |
| 288 | Dewi R; Bijker W                                                              | 2020 | Dynamics of shoreline changes in the coastal region of Sayung, Indonesia                                                   | Change Detection; Monitoring; Multi-Temporal Images; Shoreline; Shoreline Change                                        | 12 | Egyptian Journal of Remote Sensing and Space Science          | 10.1016/j.ejrs.2019.09.001 |

|     |                                                                        |      |                                                                                                                               |                                                                                                                               |    |                                       |                                 |
|-----|------------------------------------------------------------------------|------|-------------------------------------------------------------------------------------------------------------------------------|-------------------------------------------------------------------------------------------------------------------------------|----|---------------------------------------|---------------------------------|
| 289 | Li Z; Jingjuan L; Xin Y; Xiaodong M; Xixi S; Jingpeng B                | 2020 | Remote sensing analysis of coastline changes in Hainan island during 1987-2017                                                | Coastline; Ecological Environment; Hainan Island; Mangrove; Remote Sensing                                                    | 0  | Tropical Geography                    | 10.13284/j.cnki.rddl.003260     |
| 290 | Vos K; Harley M; Splinter K; Walker A; Turner I                        | 2020 | Beach slopes from satellite-derived shorelines                                                                                | Beach Slope; Coastsat; Google Earth Engine; Landsat; Satellite Imagery; Tidal Correction                                      | 18 | Geophysical Research Letters          | 10.1029/2020GL088365            |
| 291 | Chu L; Oloo F; Sudmanns M; Tiede D; Hölbling D; Blaschke T; Teleoaca I | 2020 | Monitoring longterm shoreline dynamics and human activities in the Hangzhou Bay China combining daytime and nighttime EO data | Earth Observation; Google Earth Engine; Human Activities; Shorelines Dynamics                                                 | 6  | Big Earth Data                        | 10.1080/20964471.2020.1740491   |
| 292 | Lin K; Zhang C; Han M                                                  | 2020 | An improved distance regularization level set evolution method for coastline change detection                                 | Change Detection; Coastline Extraction; Distance Regularization Level Set Evolution Method                                    | 1  | Chinese Control Conference, Ccc       | 10.23919/CCC50068.2020.9189361  |
| 293 | Mahmud M; Mia A; Islam M; Peas M; Farazi A; Akhter S                   | 2020 | Assessing bank dynamics of the lower Meghna river in Bangladesh an integrated GIS-DSAS approach                               | Bangladesh; Bank Dynamics; Digital Shoreline Analysis System (DSAS); GIS; Lower Meghna River; Riverbank Erosion and Accretion | 4  | Arabian Journal of Geosciences        | 10.1007/s12517-020-05514-4      |
| 294 | Gremillion S; Wallace D; Wright S; Buijsman M                          | 2020 | Response and recovery of horn and Petit Bois islands Mississippi, USA to tropical cyclone impacts 2004-2016                   | Barrier Island Geomorphology; Hurricanes; LIDAR; Sediment Transport                                                           | 2  | Geomorphology                         | 10.1016/j.geomorph.2020.107152  |
| 295 | Kaamin M; Fadzil M; Razi M; Daud M; Abdullah N; Nor A; Ahmad N         | 2020 | The shoreline bathymetry assessment using Unmanned Aerial Vehicle (UAV) photogrammetry                                        | NA                                                                                                                            | 0  | Journal of Physics: Conference Series | 10.1088/1742-6596/1529/3/032109 |

|     |                                                                       |      |                                                                                                                       |                                                                                                                                           |    |                                                    |                            |
|-----|-----------------------------------------------------------------------|------|-----------------------------------------------------------------------------------------------------------------------|-------------------------------------------------------------------------------------------------------------------------------------------|----|----------------------------------------------------|----------------------------|
| 296 | Apostolopoulos D; Nikolakopoulos K                                    | 2020 | Assessment and quantification of the accuracy of low and high-resolution remote sensing data for shoreline monitoring | Accretion; Accuracy; Erosion; Forecast; Landsat; Shoreline                                                                                | 4  | ISPRS International Journal of Geo-Information     | 10.3390/ijgi9060391        |
| 297 | Specht M; Specht C; Lewicka O; Makar A; Burdzia-kowski P; Dabrowski P | 2020 | Study on the coastline evolution in SOPOT 2008-2018 based on Landsat satellite imagery                                | Coastline Changes; Landsat; Satellite Imagery; Sopot                                                                                      | 9  | Journal of Marine Science and Engineering          | 10.3390/JMSE8060464        |
| 298 | Santos C; Andriolo U; Ferreira J                                      | 2020 | Shoreline response to a sandy nourishment in a wave-dominated coast using video monitoring                            | Beach; Erosion; NearShore; Remote Sensing; Sand                                                                                           | 10 | Water (Switzerland)                                | 10.3390/W12061632          |
| 299 | Hayakawa Y; Obanawa H                                                 | 2020 | Volumetric change detection in bedrock coastal cliffs using terrestrial laser scanning and UAS-based SFM              | Change Detection; Coastal Erosion; Photogrammetry; Point Cloud; Structure from Motion; Terrestrial Laser Scanning; Unmanned Aerial System | 7  | Sensors (Switzerland)                              | 10.3390/s20123403          |
| 300 | Mitri G; Nader M; Abou D M; Gebrael K                                 | 2020 | Investigating the performance of Sentinel-2A and Landsat-8 imagery in mapping shoreline changes                       | Aerial Photography; Geographic Object-Based Image Analysis; Landsat-8 Panchromatic; Quickbird; Sentinel-2a; Shoreline Changes             | 0  | Journal of Coastal Conservation                    | 10.1007/s11852-020-00758-4 |
| 301 | Zhang Y                                                               | 2020 | An indicator and mincost approach for shoreline extraction from satellite imagery in muddy coasts                     | Geospatial Information; Muddy Coast; Satellite Image; Shoreline Extraction; The Yellow River Delta (YRD)                                  | 1  | IEEE Transactions on Geoscience and Remote Sensing | 10.1109/TGRS.2019.2963460  |
| 302 | Das S                                                                 | 2020 | Does mangrove plantation reduce coastal erosion assessment from the west coast of India                               | Accretion; Coastal Protection; Coastline Change; Erosion; Gujarat; Planted Mangroves                                                      | 4  | Regional Environmental Change                      | 10.1007/s10113-020-01637-2 |



|     |                                                                                        |      |                                                                                                                                     |                                                                                                                                                                                                         |    |                                                                   |                             |
|-----|----------------------------------------------------------------------------------------|------|-------------------------------------------------------------------------------------------------------------------------------------|---------------------------------------------------------------------------------------------------------------------------------------------------------------------------------------------------------|----|-------------------------------------------------------------------|-----------------------------|
| 303 | Ciritci D; Türk T                                                                      | 2020 | Analysis of coastal changes using remote sensing and geographical information systems in the Gulf of Izmit, Turkey                  | Change Detection; Coastline; Digital Shoreline Analysis System; GIS                                                                                                                                     | 2  | Environmental Monitoring and Assessment                           | 10.1007/s10661-020-08255-9  |
| 304 | Mullick M; Islam K; Tanim A                                                            | 2020 | Shoreline change assessment using geospatial tools: A study on the Ganges deltaic coast of Bangladesh                               | Digital Shoreline Analysis System; Ganges Deltaic Coast; Regression Techniques; Shoreline Change; Spatial Analysis                                                                                      | 15 | Earth Science Informatics                                         | 10.1007/s12145-019-00423-x  |
| 305 | Bacino G; Dragani W; Codignotto J; Pescio A; Farenga M                                 | 2020 | Shoreline change rates along samborombón Bay Río de La Plata estuary, Argentina                                                     | Conceptual Model; Río De La Plata; Salt Marshes; Samborombón Bay; Shoreline Change Rate; Swan Model                                                                                                     | 4  | Estuarine, Coastal and Shelf Science                              | 10.1016/j.ecss.2020.106659  |
| 306 | Fan Q; Liang L; Liang F; Sun X                                                         | 2020 | Research progress on coastline change in China                                                                                      | Change; China; Coastline; Progress                                                                                                                                                                      | 3  | Journal of Coastal Research                                       | 10.2112/SI99-041.1          |
| 307 | Randazzo G; Barreca G; Cascio M; Crupi A; Fontana M; Gregorio F; Lanza S; Muzirafuti A | 2020 | Analysis of very high spatial resolution images for automatic shoreline extraction and satellite-derived bathymetry mapping         | Binary Imaging Analysis; Climate Change; Coastal Erosion; Geoeye-1; Image Processing; Pocket Beach; Remote Sensing; San Vito Lo Capo; Satellite-Derived Bathymetry (SDB); Unmanned Aerial Vehicle (UAV) | 9  | Geosciences (Switzerland)                                         | 10.3390/geosciences10050172 |
| 308 | Zhao Y; Liu Q; Huang R; Pan H; Xu M                                                    | 2020 | Recent evolution of coastal tidal flats and the impacts of intensified human activities in the modern radial sand ridges east China | Coastal Revolution; Human Activities; Modern Radial Sand Ridges; Tidal Flats                                                                                                                            | 4  | International Journal of Environmental Research and Public Health | 10.3390/ijerph17093191      |

|     |                                                                      |      |                                                                                                                              |                                                                                                                            |    |                                                  |                                  |
|-----|----------------------------------------------------------------------|------|------------------------------------------------------------------------------------------------------------------------------|----------------------------------------------------------------------------------------------------------------------------|----|--------------------------------------------------|----------------------------------|
| 309 | Al-Aesawi Q; Al-Nasrawi A; Jones B                                   | 2020 | Short-term geoinformatics evaluation in the Shatt Alarab delta northwestern Arabian Persian Gulf                             | Delta Dynamism; Geoinformatics Modelling; Geomorphic Stressors; Human Impacts                                              | 3  | Journal of Coastal Research                      | 10.2112/JCOASTRES-D-19-00110.1   |
| 310 | Carvalho B; Dalbosco A; Guerra J                                     | 2020 | Shoreline position change and the relationship to annual and interannual meteoceanographic conditions in southeastern Brazil | Coastal Morphology; El Niño/La Niña Teleconnections; Landsat Imagery; Rio De Janeiro Sandy Beaches; WW3 Model              | 10 | Estuarine, Coastal and Shelf Science             | 10.1016/j.ecss.2020.106582       |
| 311 | Zulfakar M; Akhir M; Ariffin E; Awang N; Yaacob M; Chong W; Muslim A | 2020 | The effect of coastal protections on the shoreline evolution at Kuala Nerus Terengganu, Malaysia                             | Coastal Erosion; Coastal Structures; DSAS; Google Earths; UAV                                                              | 3  | Journal of Sustainability Science and Management | NA                               |
| 312 | SARhan T; Mansour N; El-Gamal M; NasSAR K                            | 2020 | Historical shoreline trend analysis in the vicinity of Elhammra port at northwestern coast of Egypt                          | and Landsat Images; DSAS; Shoreline Change Rates                                                                           | 0  | Journal of Sustainability Science and Management | NA                               |
| 313 | Sui L; Wang J; Yang X; Wang Z                                        | 2020 | Spatialtemporal characteristics of coastline changes in Indonesia from 1990 to 2018                                          | Change Monitoring; Coastline; GIS; Indonesia; Remote Sensing                                                               | 14 | Sustainability (Switzerland)                     | 10.3390/SU12083242               |
| 314 | Kalther J; Itaya A                                                   | 2020 | Coastline changes and their effects on land use and cover in Subang Indonesia                                                | Accretion; Erosion; Fishpond; MNDWI; Satellite Image                                                                       | 6  | Journal of Coastal Conservation                  | 10.1007/s11852-020-00736-w       |
| 315 | Pollard J; Spencer T; Brooks S; Christie E; Möller I                 | 2020 | Understanding spatio-temporal barrier dynamics through the use of multiple shoreline proxies                                 | Barrier Island; Shoreline Change; Shoreline Error; Shoreline Proxy                                                         | 4  | Geomorphology                                    | 10.1016/j.geomorph.2020.107058   |
| 316 | Sinitsyn A; Guegan E; Shabanova N; Kokin O; Ogorodov S               | 2020 | Fifty-four years of coastal erosion and hydrometeorological parameters in the Varandey region Barents sea                    | Arctic Coastal Dynamics; Arctic Coastal Erosion; Coastal Erosion Monitoring; Medynskiy; Pesyakov; Remote Sensing; Varandey | 7  | Coastal Engineering                              | 10.1016/j.coastaleng.2019.103610 |

|     |                                         |      |                                                                                                                                                                          |                                                                                                    |    |                                     |                                |
|-----|-----------------------------------------|------|--------------------------------------------------------------------------------------------------------------------------------------------------------------------------|----------------------------------------------------------------------------------------------------|----|-------------------------------------|--------------------------------|
| 317 | Trinh L; Le T; Kieu V; Ly T; Nguyen T   | 2020 | Application of remote sensing technique for shoreline change detection in Ninh Binh and Nam Dinh provinces Vietnam during the period 1988 to 2018 based on water indices | Awei; Landsat; Remote Sensing; Shoreline Change; Vietnam; Water Index                              | 2  | Russian Journal of Earth Sciences   | 10.2205/2020ES000686           |
| 318 | Pérez V J; Müller M                     | 2020 | Impact of Hurricane Maria on beach erosion in Puerto Rico remote sensing and causal inference                                                                            | Beach Losses; Causal Inference; Hurricane; Regression Discontinuity; SAR; Synthetic Aperture Radar | 3  | Geophysical Research Letters        | 10.1029/2020GL087306           |
| 319 | Alessio P; Keller E                     | 2020 | Short-term patterns and processes of coastal cliff erosion in Santa Barbara, California                                                                                  | Cliff Retreat; Coastal; Coastal Cliff; Seacliff                                                    | 10 | Geomorphology                       | 10.1016/j.geomorph.2019.106994 |
| 320 | Donal A; Andriani A                     | 2020 | Coastal disaster mitigation through shoreline changes analysis in Pariaman city                                                                                          | NA                                                                                                 | 0  | E3S Web of Conferences              | 10.1051/E3Sconf/202015601007   |
| 321 | Qi M; Yao X; Liu S; Zhu Y; Gao Y; Liu B | 2020 | Dynamic change of lake Qinghai shoreline from 1973 to 2018                                                                                                               | Bird Habitat Change; Lake Qinghai; Lake Shoreline Length; Lake Shoreline Tortuosity                | 4  | Hupo Kexue/Journal of Lake Sciences | 10.18307/2020.0225             |
| 322 | Hoang V                                 | 2020 | Longterm evolution of morphology at Loc an estuary Vung Tau Vietnam                                                                                                      | Erosion; Landsat Image; Longshore Sediment; Migration; River Mouth; Shoreline                      | 2  | Marine Geodesy                      | 10.1080/01490419.2019.1606125  |
| 323 | Rajasree B; Deo M                       | 2020 | Future geomorphologic changes under the changing climate                                                                                                                 | Climate Change; Geomorphologic Change; Neural Network; Numerical Model; Satellite Imageries        | 0  | Journal of Coastal Research         | 10.2112/SI89-002.1             |
| 324 | Dhanalakshmi S; Kankara R               | 2020 | Assessment on shoreline retreat in response to sea level rise Chennai coast                                                                                              | GIS; Inundation; Sea Level Rise; Shoreline Change Analysis                                         | 0  | Journal of Coastal Research         | 10.2112/SI89-024.1             |

|     |                                                                            |      |                                                                                                                                              |                                                                              |   |                             |                    |
|-----|----------------------------------------------------------------------------|------|----------------------------------------------------------------------------------------------------------------------------------------------|------------------------------------------------------------------------------|---|-----------------------------|--------------------|
| 325 | Ogorodov S; Aleksyutina D; Baranskaya A; Shabanova N; Shilova O            | 2020 | Coastal erosion of the Russian Arctic: An overview                                                                                           | Climate Change; Coastal Erosion; Ice-Free Period; Permafrost; Russian Arctic | 8 | Journal of Coastal Research | 10.2112/SI95-117.1 |
| 326 | Cabezas-Rabadán C; Pardo-Pascual J; Palomar-Vázquez J; Ferreira ; Costas S | 2020 | Satellite derived shorelines at an exposed meso-tidal beach                                                                                  | Beach Changes; Landsat-8; SDS Assessment; Sentinel-2; Subpixel Extraction    | 3 | Journal of Coastal Research | 10.2112/SI95-200.1 |
| 327 | Da S A; Woortmann L; Da S G; Murray T; Strauss D; Tomlinson R              | 2020 | A 90year morphodynamic analysis in southern Queensland, Australia                                                                            | Beach Erosion; Sand Bypassing; Shoreline Changes; Spit Development           | 5 | Journal of Coastal Research | 10.2112/SI95-085.1 |
| 328 | Tak W; Jun K; Kim S; Lee H                                                 | 2020 | Using drone and Lidar to assess coastal erosion and shoreline change due to the construction of coastal structures                           | Breakwater; Erosion; Sediment Transport; Sedimentation; Shoreline; Waterway  | 3 | Journal of Coastal Research | 10.2112/SI95-131.1 |
| 329 | Garcin M; Desmazes F; Lerma A; Gouguet L; Météreau V                       | 2020 | Contribution of lightweight revolving laser scanner hires UAV Lidars and photogrammetry for characterization of coastal aeolian morphologies | Aeolian Processes; Dune; Hand Laser; LIDAR; Photogrammetry; UAV              | 1 | Journal of Coastal Research | 10.2112/SI95-213.1 |
| 330 | Bugajny N; Furmańczyk K                                                    | 2020 | Short-term volumetric changes of berm and beachface during storm calming                                                                     | Baltic Coast; Beach Recovery; Shoreline Displacement; Volume Changes         | 1 | Journal of Coastal Research | 10.2112/SI95-077.1 |
| 331 | Murali R; Reshma K; Kumar S; Balaji S; Krishnam R D; Ramakrishnan R        | 2020 | Spatiotemporal coastal morphological changes of Godavari delta region in the east coast of India                                             | Beach Erosion; Beach Profile; Godavari Delta; Remote Sensing; Shoreline      | 0 | Journal of Coastal Research | 10.2112/SI95-122.1 |
| 332 | Martín J; Carreras D; Pons G; Almaraz                                      | 2020 | Shoreline historical evolution 1956-2015 of beaches of menorca Balearic islands                                                              | Beach Management; DSAS; Menorca; Shoreline                                   | 2 | Journal of Coastal Research | 10.2112/SI95-110.1 |
| 333 | Bergsma E; Sadio M; Sakho I; Almar R; Garlan T; Gosselin M; Gauduin H      | 2020 | Sandspit evolution and inlet dynamics derived from spaceborne optical imagery is the Senegal river inlet closing                             | Coastal; Sand-Spit; Senegal; Shoreline Change; St. Louis                     | 2 | Journal of Coastal Research | 10.2112/SI95-072.1 |

|     |                                                                              |      |                                                                                                                                                    |                                                                                                                                                                        |   |                                    |                               |
|-----|------------------------------------------------------------------------------|------|----------------------------------------------------------------------------------------------------------------------------------------------------|------------------------------------------------------------------------------------------------------------------------------------------------------------------------|---|------------------------------------|-------------------------------|
| 334 | Baranskaya A; Novikova A; Shabanova N; Romanenko F; Ogorodov S               | 2020 | Late quaternary and modern evolution of permafrost coasts at Beliy island Kara sea                                                                 | Beliy Island; Kara Sea; Permafrost; Quaternary Sediments; Thermoabration                                                                                               | 1 | Journal of Coastal Research        | 10.2112/SI95-069.1            |
| 335 | Manzolli R; Portz L; Villate D; Contreras M; Padilla J L; Alcántara-Carrió J | 2020 | Magnitude and causes of beach accretion on the eastern margin of the Tayrona national natural park Colombian caribbean                             | DSAS; Hurricanes; Litoral Drift; Sediment Input; Shoreline Migration; Tourist Pressure                                                                                 | 0 | Journal of Coastal Research        | 10.2112/SI95-058.1            |
| 336 | Nicu I; Stalsberg K; Rubensdotter L; Martens V; Flyen A                      | 2020 | Coastal erosion affecting cultural heritage in Svalbard: A case study in Hiorthhamn Adventfjorden an abandoned mining settlement                   | Coastal Erosion; Cultural Heritage; DSAS; Geomorphological Mapping; High Arctic; Monitoring; Shoreline; Svalbard                                                       | 8 | Sustainability (Switzerland)       | 10.3390/su12062306            |
| 337 | Boye C; Fiadonu E                                                            | 2020 | Lithological effects on rocky coastline stability                                                                                                  | Accretion; Earth Sciences; Environmental Science; Microscopy; Mineralogy; Petrography; Quartz-Feldspar Ratio; Recession; Sandstones; Shoreline Change; Stacks of Rocks | 0 | Heliyon                            | 10.1016/j.heliyon.2020.e03539 |
| 338 | Kabir M; Salauddin M; Hossain K; Tanim I; Saddam M; Ahmad A                  | 2020 | Assessing the shoreline dynamics of Hatiya island of Meghna estuary in Bangladesh using multiband satellite imageries and hydrometeorological data | Change Detection; Coastal Dynamics; offshore Island; Shoreline Dynamics                                                                                                | 9 | Regional Studies In Marine Science | 10.1016/j.rsma.2020.101167    |
| 339 | Di P G; Rodríguez G; Roskopf C                                               | 2020 | Short to midterm shoreline changes along the southeastern coast of Gran Canaria island, Spain                                                      | Beach Erosion–Accretion; Coastal Defences; Marine Climate; Multi-Temporal GIS Analysis; Shoreline Evolution                                                            | 3 | Rendiconti Lincei                  | 10.1007/s12210-020-00872-3    |

|     |                                                    |      |                                                                                                                                                                             |                                                                                                                                    |   |                                                        |                                  |
|-----|----------------------------------------------------|------|-----------------------------------------------------------------------------------------------------------------------------------------------------------------------------|------------------------------------------------------------------------------------------------------------------------------------|---|--------------------------------------------------------|----------------------------------|
| 340 | Mohamed S                                          | 2020 | Coastal vulnerability assessment using GIS-based multicriteria analysis of alexandrianorthwestern Nile delta Egypt                                                          | Alexandria-Northwestern Nile Delta; Aster; Atellite Images; Classification; Coastal Vulnerability; Dem; Egypt; GIS; Multi-Criteria | 5 | Journal of African Earth Sciences                      | 10.1016/j.jafrearsci.2020.103751 |
| 341 | Johnson C; Chen Q; Ozdemir C                       | 2020 | Lidar timeseries analysis of a rapidly transgressing low-lying mainland barrier caminada headlands Louisiana, USA                                                           | Coastal Geomorphology; Hurricanes; LIDAR; Shoreline Erosion                                                                        | 5 | Geomorphology                                          | 10.1016/j.geo-morph.2019.106979  |
| 342 | Song Y; Li D; Hou X                                | 2020 | Characteristics of mainland coastline changes in southeast Asia during the 21st century                                                                                     | Coastline Change Rate; Coastline Fractal Dimension; Coastline Structure; Land-Sea Interchange                                      | 2 | Journal of Coastal Research                            | 10.2112/JCOASTRES-D-19-00018.1   |
| 343 | Nagdee M; Nurse L; Inniss L; Chadwick A; Johnson T | 2020 | Historical shoreline mapping application of the digital shoreline analysis system to the evolution of worthing beach barbados following hurricanes Allen 1980 and Ivan 2004 | Aerial Photographs; Coastal Erosion; DSAS; GIS; Hurricanes; Linear Regression; Shoreline Projection; Transects                     | 0 | Journal of Coastal Research                            | 10.2112/JCOASTRES-D-18-00098.1   |
| 344 | Natih N; Pasaribu R; Sangadji M; Kusumaningrum E   | 2020 | Study on shoreline changes using Landsat imagery in sangsit region Bali province                                                                                            | NA                                                                                                                                 | 1 | IOP Conference Series: Earth and Environmental Science | 10.1088/1755-1315/429/1/012059   |
| 345 | Goksel C; Senel G; Dogru A                         | 2020 | Determination of shoreline change along the Black sea coast of Istanbul using remote sensing and GIS technology                                                             | Coastal Erosion; DSAS; Landsat-8; Normalized Difference Water Index; Shoreline Change; Spectral Water Index Algorithms             | 0 | Desalination and Water Treatment                       | 10.5004/dwt.2020.24975           |
| 346 | Vu M; Lacroix Y; Van T V; Nguyen V                 | 2020 | Prediction of shoreline changes in Almanarre beach using geospatial techniques                                                                                              | Accretion; DSAS; Erosion; Remote Sensing; Shoreline Extraction]                                                                    | 1 | Indian Journal of Geo-Marine Sciences                  | NA                               |

|     |                                                                                    |      |                                                                                                                                                     |                                                                                                      |    |                                                        |                                |
|-----|------------------------------------------------------------------------------------|------|-----------------------------------------------------------------------------------------------------------------------------------------------------|------------------------------------------------------------------------------------------------------|----|--------------------------------------------------------|--------------------------------|
| 347 | Tyagi S; Rai S                                                                     | 2020 | Monitoring shoreline changes along Andhra coast of India using remote sensing and geographic information system                                     | Andhra Coast; DSAS; GIS; NSM; Remote Sensing; Shoreline Change                                       | 3  | Indian Journal of Geo-Marine Sciences                  | NA                             |
| 348 | Zhang Y; Hou X                                                                     | 2020 | Characteristics of coastline changes on southeast Asia islands from 2000 to 2015                                                                    | Climate Change; Coastal Risk; Coastline Change; Island; Southeast Asia; Spatial Variability          | 13 | Remote Sensing                                         | 10.3390/rs12030519             |
| 349 | Angnuureng D; Jayson-Quashigah P; Almar R; Stieglitz T; Anthony E; Aheto D; Addo K | 2020 | Application of shore-based video and Unmanned Aerial Vehicles drones complementary tools for beach studies                                          | Beach Profile; Coastal Management; Dzita; Intertidal Morphology; Shoreline Change; UAV; Video Camera | 10 | Remote Sensing                                         | 10.3390/rs12030394             |
| 350 | Dalabehera L; Hazra A; Pattanayak S; Pal T                                         | 2020 | The paleo-beach ridges of Digha coastal tract west Bengal India observation and implication for sea regression from 500 ybp to 200 ybp              | NA                                                                                                   | 1  | Journal of The Geological Society of India             | 10.1007/s12594-020-1402-7      |
| 351 | Otmani H; Belkessa R; Bengoufa S; Boukhediche W; Djerrai N; Abbad K                | 2020 | Assessment of shoreline dynamics on the eastern coast of Algiers, Algeria a spatiotemporal analysis using in situ measurements and geospatial tools | Coastal Vulnerability; DGPS; DSAS; Eastern Algiers; Erosion; Geomorphology; GIS; Shoreline           | 5  | Arabian Journal of Geosciences                         | 10.1007/s12517-020-5069-6      |
| 352 | Muskananfola M; Supriharyono S; Febrianto S                                        | 2020 | Spatiotemporal analysis of shoreline change along the coast of Sayung Demak, Indonesia using digital shoreline analysis system                      | DSAS; Erosion Accretion; Sayung Demak; Shoreline Changes                                             | 13 | Regional Studies In Marine Science                     | 10.1016/j.rsma.2020.101060     |
| 353 | Warnadi W; A'Rachman F; Hijrawadi S                                                | 2020 | Spatio-temporal shoreline change analysis in the downstream area of Cisadane watershed since 1972                                                   | NA                                                                                                   | 0  | IOP Conference Series: Earth and Environmental Science | 10.1088/1755-1315/412/1/012007 |
| 354 | Jalaludin M; Setiawan C; Zid M; Utomo R                                            | 2020 | Analysis of shoreline changes before and after the tsunami at Tanjung lesung beach Banten province of Indonesia                                     | NA                                                                                                   | 2  | IOP Conference Series: Earth and Environmental Science | 10.1088/1755-1315/412/1/012004 |

|     |                                               |      |                                                                                                                                                                         |                                                                                                                                                         |   |                                                                                          |                               |
|-----|-----------------------------------------------|------|-------------------------------------------------------------------------------------------------------------------------------------------------------------------------|---------------------------------------------------------------------------------------------------------------------------------------------------------|---|------------------------------------------------------------------------------------------|-------------------------------|
| 355 | Danladi I; Gül M; Ateş E                      | 2020 | Response of the barrier island coastal region of southwestern Nigeria to climate and non-climate forcing                                                                | Coastal Erosion; Eko Atlantic Project; Gulf of Guinea; Human Impacts; Landsat Imagery; Longshore Drift; Sediment Accumulation; Water Extraction Indices | 1 | African Journal of Marine Science                                                        | 10.2989/1814232X.2020.1727953 |
| 356 | Hil G                                         | 2020 | Better management through measurement: Integrating archaeological site features into a GIS-based erosion and sea level rise impact assessment-Blueskin Bay, New Zealand | Climate Change; Coastal Archaeology; Coastal Erosion; Digital Shoreline Analysis System (DSAS); Heritage Management; Sea Level Rise                     | 6 | Journal of Island and Coastal Archaeology                                                | 10.1080/15564894.2018.1531331 |
| 357 | Pizzo S; Angrisano A; Gaglione S; Troisi S    | 2020 | Assessment of shoreline detection using UAV                                                                                                                             | NA                                                                                                                                                      | 0 | Metrosea 2020 - Tc19 International Workshop on Metrology For The Sea                     | NA                            |
| 358 | Bui D; Nguyen Q; Vo N; Thai T; Gourbesville N | 2020 | Coastline change assessment for Quang Ngai province using Landsat image                                                                                                 | Remote Sensing; Shoreline Change; Vietnam Central                                                                                                       | 0 | Springer Water                                                                           | 10.1007/978-981-15-5436-0_58  |
| 359 | Hastuti A; Nagai M                            | 2020 | Coastline change detection using remote sensing approach in Buleleng Regency Bali province                                                                              | Abrasion; Accretion; Buleleng Regency; MNDWI; Sentinel-2                                                                                                | 0 | ACRS 2020 - 41st Asian Conference on Remote Sensing                                      | NA                            |
| 360 | Do A; Kralli V; Vries S; Nguyen V; Stive M    | 2020 | Morphodynamics of a seasonal inlet: A case study using remote sensing and numerical modelling for Cua Dai inlet central Vietnam                                         | Coastal Squeeze; Cua Dai Beach; Cua Dai Inlet; Seasonal Inlet                                                                                           | 0 | APAC 2019 - Proceedings of The 10th International Conference on Asian and Pacific Coasts | 10.1007/978-981-15-0291-0_58  |



|     |                              |      |                                                                                                             |                                                                                                          |   |                                                                                                            |                              |
|-----|------------------------------|------|-------------------------------------------------------------------------------------------------------------|----------------------------------------------------------------------------------------------------------|---|------------------------------------------------------------------------------------------------------------|------------------------------|
| 361 | Vo N; Vo T; Nguyen C         | 2020 | Landsat image processing application for Binhdin h shoreline change                                         | Binhdin h Province; Image Processing; Landsat Image; Shoreline Change                                    | 2 | APAC 2019 - Proceedings of The 10th International Conference on Asian and Pacific Coasts                   | 10.1007/978-981-15-0291-0_45 |
| 362 | Pham V C; Nguyen-Van G       | 2020 | Longterm coastline monitoring in the Tra Vinh province using Landsat images                                 | Coastline Monitoring; Google Earth Engine; Landsat Images; Multi-Temporal Cloud Removal                  | 1 | APAC 2019 - Proceedings of The 10th International Conference on Asian and Pacific Coasts                   | 10.1007/978-981-15-0291-0_70 |
| 363 | Bayram B; Ince A             | 2020 | Integration of self-organizing map and machine learning methods to extract shorelines from Landsat-8 images | Artificial Neural Networks; Landsat-8 Imagery; Random Forest; Self-Organizing Maps; Shoreline Extraction | 0 | 40th Asian Conference on Remote Sensing, ACRS 2019: Progress of Remote Sensing Technology For Smart Future | NA                           |
| 364 | Bayram B; Seker D; Akpinar B | 2020 | Efficiency of different machine learning methods for shoreline extraction from UAV images                   | Random Forest; Shoreline Extraction; Support Vector Machines; UAV; Water Body Classification             | 0 | 40th Asian Conference on Remote Sensing, ACRS 2019: Progress of Remote Sensing Technology For Smart Future | NA                           |

|     |                                                                                  |      |                                                                                                                                                                                                                                                                                                                |                                                                                                           |   |                                          |                                 |
|-----|----------------------------------------------------------------------------------|------|----------------------------------------------------------------------------------------------------------------------------------------------------------------------------------------------------------------------------------------------------------------------------------------------------------------|-----------------------------------------------------------------------------------------------------------|---|------------------------------------------|---------------------------------|
| 365 | Moreira T; Albuquerque M; Espinoza J; De P D; Alves D; Barros E; Bendô A; Da C T | 2020 | Study of the shoreline behavior at Icarai beach Caucaia Ceará using digital shoreline analysis system and the change polygon methods estudo do comportamento da linha de costa na praia do icaraí caucaia ceará a partir dos métodos digital shoreline analysis system e do polígono de mudança                | Change Polygon; DSAS; Erosion; Remote Sensing                                                             | 0 | Revista Brasileira De Geografia Fisica   | 10.26848/rbgf.v13.07.p3395-3411 |
| 366 | Da S N C; Duarte C; Souto M; Freires E; De S W; Da S M                           | 2020 | Identification of the erosive and depositional sectors of the Icapuí CE shoreline based on remote sensing products and geoprocessing techniques caracterização dos setores erosivos e deposicionais da linha de costa de icapuí ce com base em produtos de sensoriamento remoto e técnicas de geoprocessamento | Coastal Erosion; Shoreline Change; Temporal Analysis                                                      | 0 | Revista Brasileira De Geografia Fisica   | 10.26848/rbgf.v13.1.p143-155    |
| 367 | Bidorn B; PhanomphongphaiSARn N; Rukvichai C; Kongsawadworakul P                 | 2020 | Evolution of mangrove muddy coast in the western coast of the upper Gulf of Thailand over the past six decades                                                                                                                                                                                                 | Coastal Erosion; Human Activities; Mangrove Deforestation; Shoreline Change                               | 3 | Springer Water                           | 10.1007/978-981-15-2081-5_25    |
| 368 | Van L N; Van B D; Bac D; Cuong N; Nga P; Burkhard B; Chi G                       | 2020 | Assessment of shoreline changes for setback zone establishment from Son Tra (Da Nang city) to Cua Dai (Hoi An city), Vietnam                                                                                                                                                                                   | Coastal Erosion; Hoi An; Linear Regression; Setback Zone; Shoreline Changes                               | 3 | Vietnam Journal of Earth Sciences        | 10.15625/0866-7187/42/4/15410   |
| 369 | Italiani D; Siegle E; Noernberg M                                                | 2020 | Tidal inlet migration and formation: The case of the Ararapira inlet Brazil                                                                                                                                                                                                                                    | Coastline Trends; Spit Breaching; Tidal Inlet Processes                                                   | 0 | Ocean and Coastal Research               | 10.1590/S2675-28242020068314    |
| 370 | Foti G; Barillà G; Barbaro G; Puntorieri P                                       | 2020 | Remote sensing and GIS to support coastal erosion risk analysis in Calabria, Italy                                                                                                                                                                                                                             | Coastal Erosion; Coastal Risk Assessment; GIS; Index-Based Methodology; Remote Sensing; Shoreline Changes | 0 | Wit Transactions on Engineering Sciences | 10.2495/RISK200061              |

|     |                                                                    |      |                                                                                                                          |                                                                                                                            |    |                                                                                                        |                               |
|-----|--------------------------------------------------------------------|------|--------------------------------------------------------------------------------------------------------------------------|----------------------------------------------------------------------------------------------------------------------------|----|--------------------------------------------------------------------------------------------------------|-------------------------------|
| 371 | Sharma G; Patnaik K                                                | 2020 | Assessment of coringa mangrove shoreline migration using geo-spatial techniques                                          | Accretion; End Point Rate; Erosion; Linear Regression Rate; Mangrove Shoreline; Net Shoreline Movement                     | 1  | Journal of Operational Oceanography                                                                    | 10.1080/1755876X.2020.1840245 |
| 372 | Cherkez E; Medinets V; Pavlik T; Gazyetov Y; Medinets S; Kozlova T | 2020 | Using of Landsat space images to study the dynamic of coastline changes in the Black sea north-western part in 1983-2013 | NA                                                                                                                         | 2  | Geoinformatics 2020 - Xixth International Conference "Geoinformatics: Theoretical and Applied Aspects" | NA                            |
| 373 | Liu Z; Xu N; Wang J                                                | 2020 | Satellite-observed evolution dynamics of the Yellow river delta in 1984-2018                                             | Coast Expansion and Shrinkage; Remote Sensing; Runoff and Sediment; Spatio-temporal Analyses; Yellow River Delta (YRD)     | 3  | IEEE Journal of Selected topics In Applied Earth Observations and Remote Sensing                       | 10.1109/JSTARS.2020.3026708   |
| 374 | Yasir M; Sheng H; Fan H; Nazir S; Niang A; Salaudin M; Khan S      | 2020 | Automatic coastline extraction and changes analysis using remote sensing and GIS technology                              | Canny Edge Detection; Change Detection; Coastline Detection; Digital Shoreline Analysis System (DSAS); GIS; Remote Sensing | 13 | IEEE Access                                                                                            | 10.1109/ACCESS.2020.3027881   |
| 375 | Apostolopoulos D; Nikolakopoulos K; Boumpoulis V; Depountis N      | 2020 | GIS based analysis and accuracy assessment of low-resolution satellite imagery for coastline monitoring                  | Accuracy; Coastline; GIS; Landsat Imagery; Low Resolution; Monitoring; Shoreline                                           | 1  | Proceedings of Spie - The International Society For Optical Engineering                                | 10.1117/12.2573440            |

|     |                                                                      |      |                                                                                                                                                                                                      |                                                                                                                 |   |                                                                                          |                                      |
|-----|----------------------------------------------------------------------|------|------------------------------------------------------------------------------------------------------------------------------------------------------------------------------------------------------|-----------------------------------------------------------------------------------------------------------------|---|------------------------------------------------------------------------------------------|--------------------------------------|
| 376 | Bio A; Gonçalves J; Pinho J; Vieira L; Vieira J; Smirnov G; Bastos L | 2020 | Coastal erosion vulnerability indicators: A case study in Northern Portugal indicadores de vulnerabilidade de erosão costeira um estudo de caso no norte de Portugal                                 | Coastal Erosion; Coastal Risks; Coastal Vulnerability; Morphodynamics                                           | 2 | Journal of Integrated Coastal Zone Management                                            | 10.5894/RGCI-N337                    |
| 377 | Chiara B G; Foti G; Barbaro G; Puntorieri P                          | 2020 | Shoreline changes of a pocket beach a remote sensing application                                                                                                                                     | Pocket Beach; Remote Sensing; Sea Storms; Shoreline Changes; Wave Climate                                       | 1 | Proceedings of Spie - The International Society For Optical Engineering                  | 10.1117/12.2571212                   |
| 378 | Jialiu L; Rongyong H; Kefu Y                                         | 2020 | Analysis on the geomorphic changes of Huangyan island based on satellite images over the past 40 years                                                                                               | Climate Changes; Coral Reefs; Geomorphology; Huangyan Island; Remote Sensing                                    | 1 | Quaternary Sciences                                                                      | 10.11928/j.issn.1001-7410.2020.03.15 |
| 379 | Ghorai D; Bhunia G                                                   | 2020 | Automatic shoreline detection and its forecast: A case study on Dr Abdul Kalam island in the section of Bay of Bengal                                                                                | Automatic Shoreline Extraction; Dr. Abdul Kalam Island; Geospatial Approach; Landsat Data; Shoreline Prediction | 0 | Geocarto International                                                                   | 10.1080/10106049.2020.1815868        |
| 380 | Simões R; De O U                                                     | 2020 | Monthly monitoring of coastline in mostardense beach rs between 2016-2017 using UAV data monitoramento mensal da linha de costa no balneário mostardense rs entre 2016-2017 utilizando dados de vant | Beach Dune Limit; Change Polygon Method; Coastal Erosion; Frontal Dunes; UAV (Drone)                            | 1 | Quaternary and Environmental Geosciences                                                 | 10.5380/ABE-QUA.V11I1.65729          |
| 381 | Dang A; Nguyen T                                                     | 2020 | Coastal erosion in Cua Dai beach future influence of climate change and sea level rise on coastal protection                                                                                         | Climate Change; Coastal Defenses; Coastal Erosion; Cua Dai Beach; Sea Level Rise                                | 2 | APAC 2019 - Proceedings of The 10th International Conference on Asian and Pacific Coasts | 10.1007/978-981-15-0291-0_72         |

|     |                                                                                  |      |                                                                                                                                                   |                                                                                                                         |    |                                                |                                     |
|-----|----------------------------------------------------------------------------------|------|---------------------------------------------------------------------------------------------------------------------------------------------------|-------------------------------------------------------------------------------------------------------------------------|----|------------------------------------------------|-------------------------------------|
| 382 | PhanomphongphaiSARn N; Rukvichai C; Bidorn B                                     | 2020 | Impacts of long jetties construction on shoreline change at the western coast of the Gulf of Thailand                                             | Coastal Structure; Monitoring; One-Line Model; Sediment Characteristics; Shoreline Change                               | 3  | Engineering Journal                            | 10.4186/ej.2020.24.4.1              |
| 383 | Cham D; Son N; Minh N; Thanh N; Dung T                                           | 2020 | An analysis of shoreline changes using combined multi-temporal remote sensing and digital evaluation model                                        | Cua Dai; Erosion; Shoreline Evolution; Tidal Correction; Tidal Level                                                    | 27 | Civil Engineering Journal (Iran)               | 10.28991/cej-2020-03091448          |
| 384 | Arif D; Prarikeslan W; Syaharani L                                               | 2020 | Analysis of shoreline dynamics for coastal management practice in Pariaman west Sumatera                                                          | Abrasion and Accretion; Coastal Management; DSAS; Shoreline Change                                                      | 0  | International Journal of Geomate               | 10.21660/2020.72.ICGEO19            |
| 385 | Kravtsova V; Vakhnina O                                                          | 2020 | Investigations of the yenisei river delta dynamics in multitemporal satellite images                                                              | Accumulation of Sediments; Coastal Erosion; Coastline; Delta Area Changes; Dynamics Maps; Remote Sensing Methods        | 1  | Geodezia I Kartografia                         | 10.22389/0016-7126-2020-955-1-34-47 |
| 386 | Eidam E; Sutherland D; Ralston D; Dye B; Conroy T; Schmitt J; Ruggiero P; Wood J | 2020 | Impacts of 150 years of shoreline and bathymetric change in the coos estuary Oregon, USA                                                          | Dredging; Estuary; Finite-Volume Model; Habitat Change; Hydrodynamics; Sea-Level Rise; Sediment; Shoreline Change       | 4  | Estuaries and Coasts                           | 10.1007/s12237-020-00732-1          |
| 387 | Elnabwy M; Elbeltagi E; El B M; Elshikh M; Motawa I; Kaloop M                    | 2020 | An approach based on Landsat images for shoreline monitoring to support integrated coastal management: A case study Ezbet Elborg Nile delta Egypt | Accuracy Assessment; GIS; Integrated Coastal Management; Landsat Images; Nile Delta; Seawall; Supported Vector Machines | 15 | ISPRS International Journal of Geo-Information | 10.3390/ijgi9040199                 |
| 388 | Zanutta A; Lambertini A; Vittuari L                                              | 2020 | UAV photogrammetry and ground surveys as a mapping tool for quickly monitoring shoreline and beach changes                                        | Coastline Mapping; Geomatics; Network Rtk; SFM Photogrammetry                                                           | 23 | Journal of Marine Science and Engineering      | 10.3390/JMSE8010052                 |

|      |                                                                                                                                               |      |                                                                                                                                                        |                                                                                                                                                                     |    |                                                 |                            |
|------|-----------------------------------------------------------------------------------------------------------------------------------------------|------|--------------------------------------------------------------------------------------------------------------------------------------------------------|---------------------------------------------------------------------------------------------------------------------------------------------------------------------|----|-------------------------------------------------|----------------------------|
| 389  | Novellino A; Engwell S; Grebby S; Day S; Cassidy M; Madden-Nadeau A; Watt S; Pyle D; Abdurrachman M; Nurshal M; Tappin D; Kurniawan I; Hunt J | 2020 | Mapping recent shoreline changes spanning the lateral collapse of Anak Krakatau volcano Indonesia                                                      | Anak Krakatau; Cloud Computing; Explosive Volcanism; Google Earth Engine; Sentinel-2; Shoreline; Tsunami Hazards                                                    | 9  | Applied Sciences (Switzerland)                  | 10.3390/app10020536        |
| 390  | Rodriguez-Padilla I; Castelle B; Marieu V; Morichon D                                                                                         | 2020 | A simple and efficient image stabilization method for coastal monitoring video systems                                                                 | Geo-Rectification; Image Stabilization; Shoreline Change; Video Monitoring                                                                                          | 13 | Remote Sensing                                  | 10.3390/RS12010070         |
| 391  | Kanwal S; Ding X; Sajjad M; Abbas S                                                                                                           | 2020 | Three decades of coastal changes in Sindh, Pakistan (1989-2018): A geospatial assessment                                                               | Coastal Erosion; DSAS; Geographic Information System; Indus Delta Region; Landsat; Remote Sensing                                                                   | 5  | Remote Sensing                                  | 10.3390/RS12010008         |
| 1534 | Yasir M; Sheng H; Huang B; Rahman S                                                                                                           | 2020 | Coastline extraction and land use change analysis using remote sensing RS and geographic information system GIS technology: A review of the literature | Change Analysis; Coastline Extraction; GIS; Remote Sensing Data                                                                                                     | 0  | Reviews on Environmental Health                 | 10.1515/reveh-2019-0103    |
| 1539 | Medvedev A; Telnova N; Alekseenko N; Koshkarev A; Kuznetchenko P; Asmaryan S; Narykov A                                                       | 2020 | UAV-derived data application for environmental monitoring of the coastal area of lake Sevan Armenia with a changing water level                        | UAV; Highly-Detailed Spatial Data; Thermal Survey; Coastal Processes; Shoreline Position; Coastal Wetlands; Eutrophication; Multi-Platform Environmental Monitoring | 3  | Remote Sensing                                  | 10.3390/rs12223821         |
| 1548 | Al-Zubieri A; Ghandour I; Bantan R; Basaham A                                                                                                 | 2020 | Shoreline evolution between al lith and ras mahasin on the Red sea coast Saudi Arabia using GIS and DSAS techniques                                    | Shoreline Evolution; DSAS; Endpoint Rate; Linear Regression Rate; Red Sea                                                                                           | 3  | Journal of The Indian Society of Remote Sensing | 10.1007/s12524-020-01169-6 |

|      |                                                               |      |                                                                                                                                                  |                                                                                                                         |    |                                                     |                               |
|------|---------------------------------------------------------------|------|--------------------------------------------------------------------------------------------------------------------------------------------------|-------------------------------------------------------------------------------------------------------------------------|----|-----------------------------------------------------|-------------------------------|
| 1566 | Ciritci D; Turk T                                             | 2020 | Automatic detection of shoreline change by geographical information system GIS and remote sensing in the Seyhan delta Turkey vol 47 pg 233 2019  | NA                                                                                                                      | 0  | Journal of The Indian Society of Remote Sensing     | 10.1007/s12524-020-01116-5    |
| 1567 | Apostolopoulos D; Nikolakopoulos K                            | 2020 | Assessment and quantification of the accuracy of low and high-resolution remote sensing data for shoreline monitoring                            | Landsat; Shoreline; Erosion; Accretion; Forecast; Accuracy                                                              | 2  | ISPRS International Journal of Geo-Information      | 10.3390/ijgi9060391           |
| 1580 | Darmiati ; Nurjaya I; Atmadipoera A                           | 2020 | Analysis of shoreline change in west coast area of Tanah Laut district south Kalimantan                                                          | Abrasion and Accretion; Coastline Changes; Landsat Imagery; Tanah Laut Registry                                         | 0  | Jurnal Ilmu Dan Teknologi Kelautan Tropis           | 10.29244/jitkt.v12i1.22815    |
| 1581 | Elnabwy M; Elbeltagi E; El B M; Elshikh M; Motawa I; Kaloop M | 2020 | An approach based on Landsat images for shoreline monitoring to support integrated coastal management a case study ezbet Elborg Nile delta Egypt | Integrated Coastal Management; Nile Delta; GIS; Landsat Images; Supported Vector Machines; Accuracy Assessment; Seawall | 11 | ISPRS International Journal of Geo-Information      | 10.3390/ijgi9040199           |
| 1587 | Nazeer M; Waqas M; Shahzad M; Zia I; Wu W                     | 2020 | Coastline vulnerability assessment through Landsat and CUBESATS in a coastal mega city                                                           | Shoreline Change; Landsat; Planet Scope; Coastline; Morphological Changes                                               | 10 | Remote Sensing                                      | 10.3390/rs12050749            |
| 1606 | Islam M; Rahman M; Kabir M; Islam M; Chowdhury R              | 2020 | Predictive assessment on landscape and coastal erosion of Bangladesh using geospatial techniques                                                 | LULC; Sub-District; Accretion-Erosion; Mangrove Forest; Conversion                                                      | 4  | Remote Sensing Applications-Society and Environment | 10.1016/j.rsase.2019.100277   |
| 1608 | Sabuncu A                                                     | 2020 | Monitoring shoreline change of Acigol and Burdur lake in Turkey over 44 years using remote sensing and GIS approaches                            | Burdur Lake; Acigol Lake; SVM Classification; OBIA Classification; NDWI; MNDWI                                          | 1  | Fresenius Environmental Bulletin                    | NA                            |
| 1619 | Niang A                                                       | 2020 | Monitoring longterm shoreline changes along Yanbu kingdom of Saudi Arabia using remote sensing and GIS techniques                                | Shoreline Change; DSAS; GIS; Yanbu; Saudi Arabia                                                                        | 3  | Journal of Taibah University For Science            | 10.1080/16583655.2020.1773623 |

|      |                                                                                   |      |                                                                                                                                |                                                                                                                                                                                                          |   |                                                        |                                |
|------|-----------------------------------------------------------------------------------|------|--------------------------------------------------------------------------------------------------------------------------------|----------------------------------------------------------------------------------------------------------------------------------------------------------------------------------------------------------|---|--------------------------------------------------------|--------------------------------|
| 1628 | Selvan S; Kankara R; Prabhu K; Rajan B                                            | 2020 | Shoreline change along Kerala southwest coast of India using geospatial techniques and field measurement                       | Shoreline Change; Erosion; WLR Method; Satellite Data and Sediment Sub-Cell                                                                                                                              | 9 | Natural Hazards                                        | 10.1007/s11069-019-03790-2     |
| 1629 | Barrantes-Castillo G; Arozarena-Llopis I; Sandoval-Murillo L; Valverde-Calderon J | 2020 | Critical beaches due to coastal erosion in the caribbean south of costa Rica during the period 2005-2016                       | Coastal Erosion; Costa Rican Caribbean; Coastal Dynamics; Limon Province; Erosion of Beaches                                                                                                             | 1 | Revista Geografica De America Central                  | 10.15359/rgac.64-1.4           |
| 1631 | Kelly J; Gontz A                                                                  | 2020 | Rapid assessment of shoreline changes induced by tropical cyclone OMA using CUBESAT imagery in southeast Queensland, Australia | Planetscope; Satellite Remote Sensing; Coastal Morphodynamics; Fraser Island; Erosion; Progradation                                                                                                      | 5 | Journal of Coastal Research                            | 10.2112/JCOASTRES-D-19-00055.1 |
| 34   | Bishop-Taylor R; Nanson R; Sagar S; Lymburner L                                   | 2021 | Mapping Australia's dynamic coastline at mean sea level using three decades of Landsat imagery                                 | Coastal Change; Coastal Erosion; Coastal Monitoring; Coastline Extraction; Cube; Landsat; Open Data; Satellite-Derived Shorelines; Sub-Pixel Waterline Extraction; Tidal Modelling; Time-Series Analysis | 4 | Remote Sensing of Environment                          | 10.1016/j.rse.2021.112734      |
| 35   | Beselly S; Sajali M                                                               | 2021 | Citizen-Science with off-the-shelf UAV for coastal monitoring                                                                  | Citizen Science; Coastal Monitoring; UAV                                                                                                                                                                 | 0 | IOP Conference Series: Earth and Environmental Science | 10.1088/1755-1315/930/1/012001 |
| 36   | Macleod R; Dallimore S                                                            | 2021 | Assessment of storm surge history as recorded by driftwood in the Mackenzie delta and Tuktoyaktuk coastlands Arctic Canada     | Arctic Driftwood; Arctic Storms; Coastal Erosion; Coastal Hazards; Storm Surge; Structure from Motion; Unoccupied Aerial Vehicle                                                                         | 0 | Frontiers In Earth Science                             | 10.3389/feart.2021.698660      |



|    |                                                                                                     |      |                                                                                                                         |                                                                                                                     |   |                                                      |                                 |
|----|-----------------------------------------------------------------------------------------------------|------|-------------------------------------------------------------------------------------------------------------------------|---------------------------------------------------------------------------------------------------------------------|---|------------------------------------------------------|---------------------------------|
| 37 | Bezzi A; Casagrande G; Fracaros S; Martinucci D; Pillon S; Sponza S; Bratus A; Fattor F; Fontolan G | 2021 | Geomorphological changes of a migrating sandbank multi-decadal analysis as a tool for managing conflicts in coastal use | Backbarrier; Barrier; Coastal Zone Management; Historical Evolution; Migration; Sandbank; Shoreline Analysis        | 1 | Water (Switzerland)                                  | 10.3390/w13233416               |
| 38 | Bagot P; Huybrechts N; Sergent P                                                                    | 2021 | Satellite-derived topography and morphological evolution around Authie macrotidal estuary (France)                      | Coastal Monitoring; Morphological Changes; Remote Sensing; Sandspit; Satellite Derived Topography; Waterline Method | 0 | Journal of Marine Science and Engineering            | 10.3390/jmse9121354             |
| 39 | Li C; Zhu L; Dai Z; Wu Z                                                                            | 2021 | Study on spatiotemporal evolution of the Yellow river delta coastline from 1976 to 2020                                 | Coastline Changes; Diaokou; Qingshuigou; Spatial and Temporal Evolution; Yellow River Delta                         | 0 | Remote Sensing                                       | 10.3390/rs13234789              |
| 40 | Sundar V; Sannasiraj S; Ramesh B S; Rajakan G                                                       | 2021 | Shoreline changes due to construction of groyne field in north of Chennai port India                                    | DSAS; Groyne Field; Shoreline Change; Statistical Measure                                                           | 0 | Environmental Monitoring and Assessment              | 10.1007/s10661-021-09590-1      |
| 41 | Zhang Y; Li D; Fan C; Xu H; Hou X                                                                   | 2021 | Southeast Asia island coastline changes and driving forces from 1990 to 2015                                            | Climate Change; Coastline Change; Human Activity; Island; Sea Level Rise; South East Asia                           | 0 | Ocean and Coastal Management                         | 10.1016/j.ocecoaman.2021.105967 |
| 42 | Rajakumari S; Meenambikai M; Divya V; Sarunjith K; Ramesh R                                         | 2021 | Morphological changes in alluvial and coastal plains of kandaleru river andhra pradesh using RS and GIS                 | Alluvial Plain; Anthropogenic Conversions; Coastal Plain; DSAS; Impacts; MLC; Morphological Stress; Spatial Analyst | 0 | Egyptian Journal of Remote Sensing and Space Science | 10.1016/j.ejrs.2021.10.008      |
| 43 | Kumar D S; Sajan B; Ojha C; Soren S                                                                 | 2021 | Shoreline change behavior study of Jambudwip island of Indian Sundarban using DSAS model                                | DSAS; Jambudwip; NDVI; Remote Sensing; Shoreline Change                                                             | 2 | Egyptian Journal of Remote Sensing and Space Science | 10.1016/j.ejrs.2021.09.004      |

|    |                                                          |      |                                                                                                                                                  |                                                                                                                        |   |                                                      |                                  |
|----|----------------------------------------------------------|------|--------------------------------------------------------------------------------------------------------------------------------------------------|------------------------------------------------------------------------------------------------------------------------|---|------------------------------------------------------|----------------------------------|
| 44 | Stancheva M; Stanchev H; Young R; Parlichev G            | 2021 | Coastal erosion driven landsea interactions in maritime spatial planning: A case of Bulgaria                                                     | Beach Changes; Cliff Retreat; DSAS; Maritime Spatial Planning; Nature-Based Solutions                                  | 0 | Journal of Coastal Conservation                      | 10.1007/s11852-021-00841-4       |
| 45 | Mondal B; Saha A; Roy A                                  | 2021 | Shoreline extraction and change estimation using geospatial techniques: A study of coastal west Bengal India                                     | Azimuth Erosion; Coastal West Bengal; Digital Shoreline Analysis System (DSAS); Shoreline; Tasseled-Cap Transformation | 0 | Proceedings of The Indian National Science Academy   | 10.1007/s43538-021-00059-w       |
| 46 | Mishra M; Santos C; Da S R; Rana N; Kar D; Parida N      | 2021 | Monitoring vegetation loss and shoreline change due to tropical cyclone Fani using Landsat imageries in Balukhandkonark wildlife Sanctuary India | Coastal Zone; DSAS; Environmental Monitoring; Geospatial Analysis; Land Use Change; SAVI                               | 0 | Journal of Coastal Conservation                      | 10.1007/s11852-021-00840-5       |
| 47 | Shanmuga P S; Jena B                                     | 2021 | Suspended sediments concentration on shoreline change using satellite images for southern Kerala coast                                           | Sentinel Images; Shoreline Change Analysis; Suspended Sediment Concentration                                           | 0 | Journal of Earth System Science                      | 10.1007/s12040-021-01710-2       |
| 48 | Kar P; Mohanty P; Pradhan S; Behera B; Padhi S; Mishra P | 2021 | Shoreline change along Odisha coast using statistical and geospatial techniques                                                                  | Accretion; DSAS; Erosion; Odisha Coast; Shoreline Change                                                               | 0 | Journal of Earth System Science                      | 10.1007/s12040-021-01703-1       |
| 49 | Troy C; Cheng Y; Lin Y; Habib A                          | 2021 | Rapid lake Michigan shoreline changes revealed by UAV Lidar surveys                                                                              | Beaches; Lake Michigan; LIDAR; Shoreline Erosion; Unmanned Aerial Vehicle                                              | 1 | Coastal Engineering                                  | 10.1016/j.coastaleng.2021.104008 |
| 50 | Badawy M                                                 | 2021 | Recent landscape changes at Damietta Promontory Nile delta Egypt                                                                                 | Damietta Promontory; Geohazard; Nile Delta; SCAP Model                                                                 | 0 | Egyptian Journal of Remote Sensing and Space Science | 10.1016/j.ejrs.2021.07.002       |

|    |                                                                                                                                |      |                                                                                                                              |                                                                                                                                         |   |                                                      |                                 |
|----|--------------------------------------------------------------------------------------------------------------------------------|------|------------------------------------------------------------------------------------------------------------------------------|-----------------------------------------------------------------------------------------------------------------------------------------|---|------------------------------------------------------|---------------------------------|
| 51 | Gharib J; Smith A; Houser C                                                                                                    | 2021 | Barrier beaches and breaches historical changes on the point Pelee foreland                                                  | Breach; Coastal Barrier; Erosion; Geomorphology; Great Lakes; Human Impacts                                                             | 0 | Journal of Great Lakes Research                      | 10.1016/j.jglr.2021.06.011      |
| 52 | Goumrassa A; Zerrouki C; Hemdane Y; Bouhmadouche M; Guendouz M; Guettouche M                                                   | 2021 | GIS to identify exposed shoreline sectors to wave impacts: Case of El Tarf coast                                             | Coastal Erosion; Coastal Modeling; Erosion Mapping; Exposure; GIS; Shoreline; Significant Wave Heights; Swan Model; Wave Direction      | 0 | Applied Geomatics                                    | 10.1007/s12518-021-00380-5      |
| 53 | Pucino N; Kennedy D; Carvalho R; Allan B; Ierodiconou D                                                                        | 2021 | Citizen science for monitoring seasonal-scale beach erosion and behaviour with aerial drones                                 | NA                                                                                                                                      | 5 | Scientific Reports                                   | 10.1038/s41598-021-83477-6      |
| 54 | Abou S R; Ali R                                                                                                                | 2021 | Applying DSAS tool to detect coastal changes along Nile delta, Egypt                                                         | Change Detection; Coastal Areas; DSAS; GIS; Nile Delta                                                                                  | 5 | Egyptian Journal of Remote Sensing and Space Science | 10.1016/j.ejrs.2020.11.002      |
| 55 | Carvalho R; Kennedy D; Young M; Leach C; Ierodiconou D                                                                         | 2021 | Relevance of historical nautical charts in sediment dynamic assessments on a high energy temperate shelf                     | Bathymetric Change; Coastal Management; Multibeam Echo-sounding Bathymetry; NearShore Change; Shoreline Analysis; Volumetric Difference | 0 | Continental Shelf Research                           | 10.1016/j.csr.2021.104555       |
| 56 | Nativí-Merchán S; Caiza-Quinga R; Saltos-Andrade I; Martillo-Bustamante C; Andrade-García G; Quiñonez M; Cervantes E; Cedeño J | 2021 | Coastal erosion assessment using remote sensing and computational numerical model: Case of study Libertador Bolivar, Ecuador | Coastal Erosion; Ecuadorian Shoreline-Change; Integrated Coastal Management; LITPACK; Mike 21SW; Remote Sensing                         | 0 | Ocean and Coastal Management                         | 10.1016/j.ocecoaman.2021.105894 |

|    |                                                                        |      |                                                                                                                                                                           |                                                                                                                               |   |                                                   |                            |
|----|------------------------------------------------------------------------|------|---------------------------------------------------------------------------------------------------------------------------------------------------------------------------|-------------------------------------------------------------------------------------------------------------------------------|---|---------------------------------------------------|----------------------------|
| 57 | Tu N; Stéphane G; Le P; Xuan N; Doi N                                  | 2021 | Rapid detection of changes in the riverbanks of laigiang river of the south central coast Vietnam a methodology based on digital shoreline analysis system and Sentinel-2 | Digital Shoreline Analysis System (DSAS); Fluvial Remote Sensing; Laigiang River; Sentinel-2; Transitional Waterbody; Vietnam | 0 | Disaster Advances                                 | 10.25303/1411da1324        |
| 58 | Darweesh K; Hellal A; Saber S; El-Kafrawy S; Abdelsalam A; El-Naggar H | 2021 | Three decades of remote sensing habitat mapping along the Egyptian coast of Aqaba Gulf Red sea                                                                            | Change Detection; Dahab; Egypt; Habitat Mapping; Nuweiba'a; Overfishing; Red Sea; Remote Sensing; Tourism                     | 0 | Egyptian Journal of Aquatic Biology and Fisheries | 10.21608/ejabf.2021.214042 |
| 59 | Adhikari M; Maiti S; Bera A; Chaudhury N                               | 2021 | Posttsunami adjustment of coral reef platform and other morphometric changes in landfall island north Andamanan integrated field and remote sensing-based approach        | Coral Reef; Field Observation; Morphometric Changes; Post-Seismic Adjustment; Reef Upliftment; Shoreline Change Rate          | 0 | Regional Studies In Marine Science                | 10.1016/j.rsma.2021.101975 |
| 60 | Durai P; Sarunjith K; Bhaskar A                                        | 2021 | Demarcation of coastal dune morphology and dune patterns using geospatial models: A case study from Manapad coastal stretch Tamil Nadu south India                        | NA                                                                                                                            | 0 | Journal of The Geological Society of India        | 10.1007/s12594-021-1880-2  |
| 61 | Latella M; Luijendijk A; Moreno-Rodenas A; Camporeale C                | 2021 | Satellite image processing for the coarsescale investigation of sandy coastal areas                                                                                       | Beach Monitoring; Coastal Vegetation; Geomorphology; Google Earth Engine; Satellite Images; Shoreline Detection               | 0 | Remote Sensing                                    | 10.3390/rs13224613         |
| 62 | Mahmoud A; Hussain E; Novellino A; Psimoulis P; Marsh S                | 2021 | Monitoring the dynamics of form by sand dunes using airborne Lidar DTMs                                                                                                   | Airborne LIDAR; Coastal Dune Monitoring; DTM Analysis; Dune Volumetric Analysis                                               | 0 | Remote Sensing                                    | 10.3390/rs13224665         |

|    |                                                                               |      |                                                                                                                                                                         |                                                                                                            |   |                                                    |                                 |
|----|-------------------------------------------------------------------------------|------|-------------------------------------------------------------------------------------------------------------------------------------------------------------------------|------------------------------------------------------------------------------------------------------------|---|----------------------------------------------------|---------------------------------|
| 63 | Aryal B; Escarzaga S; Vargas Z S; Velez-Reyes M; Fuentes O; Tweedie C         | 2021 | Semiautomated semantic segmentation of Arctic shorelines using very high-resolution airborne imagery spectral indices and weakly supervised machine learning approaches | Deep Learning; Land Water Segmentation; Remote Sensing; Sparse Labels                                      | 0 | Remote Sensing                                     | 10.3390/rs13224572              |
| 64 | Rodríguez S; Valdecantos V; Diez J; Campo J; Antón M                          | 2021 | Comparing the effects of erosion and accretion along the coast of Cartagena de India's, Colombia                                                                        | Accretion; Aerial Photography; Coastline; Colonial Cartography; Colonial Maritime Works; Erosion; Littoral | 0 | Journal of Coastal Research                        | 10.2112/JCOASTRES-D-20-00129.1  |
| 65 | Teixeira S; Bandeira I; Dantas M                                              | 2021 | Shoreline variation and identification of local erosion geoindicators on the Brazilian Amazon coast                                                                     | Amazon; Coastal Geomorphology; GeoindicatorS; Morphologic Units; Remote Sensing                            | 0 | Journal of Coastal Research                        | 10.2112/JCOASTRES-D-20-00164.1  |
| 66 | Mao Y; Harris D; Xie Z; Phinn S                                               | 2021 | Efficient measurement of largescale decadal shoreline change with increased accuracy in tide-dominated coastal environments with Google Earth Engine                    | Global Shoreline Monitoring; Google Earth Engine; Landsat; Remote Sensing Big Data; Shoreline Mapping      | 1 | ISPRS Journal of Photogrammetry and Remote Sensing | 10.1016/j.isprsjprs.2021.09.021 |
| 67 | Gibbs A; Erikson L; Jones B; Richmond B; Engelstad A                          | 2021 | Seven decades of coastal change at barter island Alaska exploring the importance of waves and temperature on erosion of coastal permafrost bluffs                       | ANWR; Arctic; Coastal Dynamics; Era5 Reanalysis; Permafrost Bluff Retreat; Shoreline Change                | 0 | Remote Sensing                                     | 10.3390/rs13214420              |
| 68 | Bristow C; Buck L; Ingrid M                                                   | 2021 | Four-dimensional investigation of gravel beach ridge accretion and 50 years of beach recharge at Dungeness, UK, using historic images GPR and Lidar (HIGL)              | Beach Nourishment; Beach Recharge; Ground-Penetrating Radar; LIDAR; Sediment Budget; Shingle               | 0 | Applied Sciences (Switzerland)                     | 10.3390/app112110219            |
| 69 | Yermolaev O; Usmanov B; Gafurov A; Poesen J; Vedeneeva E; Lisetskii F; Nicu I | 2021 | Assessment of shoreline transformation rates and landslide monitoring on the bank of kuibyshev reservoir Russia using multisource data                                  | Aerial and Satellite Images; Bank Erosion; Historical Maps; Landslide; TLS; UAV; Volga                     | 1 | Remote Sensing                                     | 10.3390/rs13214214              |

|    |                                                                             |      |                                                                                                                                                             |                                                                                                                                                                                         |   |                                                        |                                |
|----|-----------------------------------------------------------------------------|------|-------------------------------------------------------------------------------------------------------------------------------------------------------------|-----------------------------------------------------------------------------------------------------------------------------------------------------------------------------------------|---|--------------------------------------------------------|--------------------------------|
| 70 | Lawson S; Tanaka H; Udo K; Hiep N; Tinh N                                   | 2021 | Morphodynamics and evolution of estuarine sandspits along the Bight of Benin coast West Africa                                                              | Bight of Benin; Coastal Erosion; Estuarine Systems; Longshore Sediment Transport; Morphodynamics; Morphological Evolution; River Mouth; Sandspit; Satellite Image Analysis; Tidal Inlet | 0 | Water (Switzerland)                                    | 10.3390/w13212977              |
| 71 | Barik G; Guru B; Sangma F                                                   | 2021 | Shoreline changes analysis and forecast using digital shoreline assessment system 50 evidences from parts of east coast of India                            | DSAS; GIS; India; Remote Sensing; Sea-Level Rise; Shoreline Change                                                                                                                      | 0 | Journal of The Indian Society of Remote Sensing        | 10.1007/s12524-021-01424-4     |
| 72 | Mageswaran T; Sachithanandam V; Sridhar R; Mahapatra M; Purvaja R; Ramesh R | 2021 | Impact of sea level rise and shoreline changes in the tropical island ecosystem of Andaman and Nicobar region India                                         | Andaman and Nicobar Islands; GIS; Remote Sensing; Sea Level Rise; Shoreline Changes                                                                                                     | 0 | Natural Hazards                                        | 10.1007/s11069-021-04895-3     |
| 73 | Nath A; Koley B; Saraswati S; Ray B                                         | 2021 | Identification of the coastal hazard zone between the areas of Rasulpur and Subarnarekha estuary east coast of India using multi-criteria evaluation method | Coastal Hazard; Multi-Criteria Evaluation; Vulnerability; Weighted Overlay                                                                                                              | 1 | Modeling Earth Systems and Environment                 | 10.1007/s40808-020-00986-5     |
| 74 | Adi P S I; Yanuarita S D; Fajriyati I D; Bin A O S; Rukminasari N; Umar M   | 2021 | The Sangkarak river watersheds morphometric changes of Maros-Pangkajene Regency                                                                             | NA                                                                                                                                                                                      | 0 | IOP Conference Series: Earth and Environmental Science | 10.1088/1755-1315/860/1/012083 |
| 75 | Brempong E; Angnuureng D; Appeaning A K; Jayson-Quashigah P                 | 2021 | Short-term seasonal changes of the Dzita beach of Ghana using geographic information system and photogrammetry                                              | Remote Sensing; Sediment                                                                                                                                                                | 0 | Interpretation                                         | 10.1190/INT-2021-0027.1        |
| 76 | Quang D; Ngan V; Tam H; Viet N; Tinh N; Tanaka H                            | 2021 | Longterm shoreline evolution using DSAS technique: A case study of Quang Nam province Vietnam                                                               | Coastline Change; Digital Shoreline Analysis System; Quang Nam Province; Satellite Images                                                                                               | 1 | Journal of Marine Science and Engineering              | 10.3390/jmse9101124            |

|    |                                                                                 |      |                                                                                                                                                |                                                                                                                                                    |   |                                |                           |
|----|---------------------------------------------------------------------------------|------|------------------------------------------------------------------------------------------------------------------------------------------------|----------------------------------------------------------------------------------------------------------------------------------------------------|---|--------------------------------|---------------------------|
| 77 | Domazetović F; Šiljeg A; Marić I; Faričić J; Vassilakis E; Panda L              | 2021 | Automated coastline extraction using the very high resolution WorldView WV satellite imagery and developed coastline extraction tool CET       | Coastline Extraction Tool (CET); Multi-spectral Data; Thermal Imagery; Worldview                                                                   | 1 | Applied Sciences (Switzerland) | 10.3390/app11209482       |
| 78 | Yun K; Lee C; He G; Park B                                                      | 2021 | Monitoring of shoreline change at Chollipo beach in South Korea                                                                                | Digital Surface Model; Sedimentation; Shorelines; Unmanned Aerial Vehicle                                                                          | 0 | Journal of Coastal Research    | 10.2112/JCR-SI114-095.1   |
| 79 | Abdurrahman U; Diastomo H; Avrionesti A; Surya M; Badriana M; Suprijo T; Park H | 2021 | Comprehensive analysis of coastal dynamics in Cirebon coastal area CCA Indonesia                                                               | Google Earth; Landsat; Remote Sensing; Shoreline Changes                                                                                           | 0 | Journal of Coastal Research    | 10.2112/JCR-SI114-090.1   |
| 80 | Park J; Jung K                                                                  | 2021 | Utilization of an Unmanned Aerial Vehicle and echosounder for shoreline surveying                                                              | DSM; Echo-Sounder; Ortho Image; Shoreline; UAV                                                                                                     | 0 | Journal of Coastal Research    | 10.2112/JCR-SI114-083.1   |
| 81 | Lee H; Kim J; Chang S; Kim I                                                    | 2021 | Analysis of beach changes after construction of submerged breakwaters                                                                          | Aerial Photography; Beach Width; Shoreline Change; Submerged BreakwaterRS                                                                          | 0 | Journal of Coastal Research    | 10.2112/JCR-SI114-061.1   |
| 82 | Han D; Lee C                                                                    | 2021 | Mapping of coastal zones using Unmanned Aerial Vehicle UAV video sequences                                                                     | Coast; Earthquake; Mapping; Unmanned Aerial Vehicles; Video                                                                                        | 0 | Journal of Coastal Research    | 10.2112/JCR-SI114-081.1   |
| 83 | Ding Y; Yang X; Jin H; Wang Z; Liu Y; Liu B; Zhang J; Liu X; Gao K; Meng D      | 2021 | Monitoring coastline changes of the Malay islands based on Google Earth Engine and dense timeseries remote sensing images                      | Dense Time-Series Images; Edge Probability Feature; Google Earth Engine; Malay Islands; Reclamation; Spatial-Temporal Dynamic Coastline Monitoring | 1 | Remote Sensing                 | 10.3390/rs13193842        |
| 84 | Zhang X; Xie R; Fan D; Yang Z; Wang H; Wu C; Yao Y                              | 2021 | Sustained growth of the largest uninhabited alluvial island in the changjiang estuary under the drastic reduction of river discharged sediment | Changjiang Estuary; Delta Evolution; Jiuduansha Island; Sandbar and Sand Island; Satellite Image                                                   | 0 | Science China Earth Sciences   | 10.1007/s11430-020-9746-3 |

|    |                                                                                             |      |                                                                                                                                                                   |                                                                                                               |   |                                                 |                                |
|----|---------------------------------------------------------------------------------------------|------|-------------------------------------------------------------------------------------------------------------------------------------------------------------------|---------------------------------------------------------------------------------------------------------------|---|-------------------------------------------------|--------------------------------|
| 85 | Lopes C; Mendes R; Caçador I; Dias J                                                        | 2021 | Assessing salt marsh loss and degradation by combining long-term Landsat imagery and numerical modelling                                                          | MaRSh Drowning; MaRSh Shoreline Erosion; Ria De Aveiro; Salt MaRSh Management; Tidal Dynamics                 | 1 | Land Degradation and Development                | 10.1002/ldr.4050               |
| 86 | Ghosh S; Mistri B                                                                           | 2021 | Delineating the influence of erosion and accretion to identify the vulnerable zone of embankment breaching in Gosaba island south 24 Parganas west Bengal, India  | Coastal Zone Management; Embankment Breaching; Gosaba Island; Shoreline Change Rate; Spatial Vulnerability    | 0 | Journal of The Indian Society of Remote Sensing | 10.1007/s12524-021-01409-3     |
| 87 | Bamdadinejad M; Ketabdari M; Chavooshi S                                                    | 2021 | Shoreline extraction using image processing of satellite imageries                                                                                                | Confusion Matrix; Landsat Images; Maximum Likelihood Classification; Shoreline Extraction; SVM Classification | 3 | Journal of The Indian Society of Remote Sensing | 10.1007/s12524-021-01398-3     |
| 88 | Karimi M; Mohammad V S J; Mazaheri M                                                        | 2021 | Shoreline spatial and temporal response to natural and human effects in Boujagh national park Iran                                                                | Boujagh National Park; Mike21; Remote Sensing; Shoreline Dynamics; Wave and Current                           | 0 | International Journal of Sediment Research      | 10.1016/j.ijsrc.2021.02.004    |
| 89 | Sajinkumar K; Bincy H; Bouali E; Oommen T; Vishnu C; Anilkumar Y; Thrivikramji K; Keerthy S | 2021 | Picturing beach erosion and deposition trends using PSInSAR: an example from the non-barred southern west coast of India                                          | Beach Processes; Erosion and Deposition; PSInSAR; Southern West Coast of India                                | 2 | Wetlands Ecology and Management                 | 10.1007/s11273-020-09706-3     |
| 90 | Sengupta M; Ford M; Kench P                                                                 | 2021 | Multidecadal planform changes on coral reef islands from Atolls and mid-ocean reef platforms of the equatorial Pacific ocean Gilbert islands Republic of Kiribati | Atolls; Coral Reef Islands; Pacific Ocean; Shoreline Change                                                   | 1 | Geomorphology                                   | 10.1016/j.geomorph.2021.107831 |
| 91 | Swirad Z; Young A                                                                           | 2021 | Automating coastal cliff erosion measurements from large-area Lidar datasets in California, USA                                                                   | Coastal Cliffs; Landslides; Machine Learning; Topographic Change Detection                                    | 0 | Geomorphology                                   | 10.1016/j.geomorph.2021.107799 |



|    |                                                                                                          |      |                                                                                                                                                           |                                                                                                                       |   |                                                |                            |
|----|----------------------------------------------------------------------------------------------------------|------|-----------------------------------------------------------------------------------------------------------------------------------------------------------|-----------------------------------------------------------------------------------------------------------------------|---|------------------------------------------------|----------------------------|
| 92 | Song Y; Shen Y; Xie R; Li J                                                                              | 2021 | A DSAS-based study of central shoreline change in Jiangsu over 45 years                                                                                   | Digital Shoreline Analysis System; GIS; Jiangsu Province; Shoreline Changes                                           | 0 | Anthropocene Coasts                            | 10.1139/anc-2020-0001      |
| 93 | Vieira L; Vieira J; Da S I; Barbieri E; Morgado F                                                        | 2021 | GIS models for vulnerability of coastal erosion assessment in a tropical protected area                                                                   | Coastal Erosion; Coastal Vulnerability Index; Geographical Information Systems; Mangroves; Remote Sensing             | 0 | ISPRS International Journal of Geo-Information | 10.3390/ijgi10090598       |
| 94 | Xia J; Luan G; Zhao F; Peng Z; Song L; Tan S; Zhao Z                                                     | 2021 | Exploring the spatial-temporal analysis of coastline changes using place name information on Hainan island, China                                         | Coastline Changes; Hainan Island; Place Names; Remote Sensing; Simulated Coastline                                    | 1 | ISPRS International Journal of Geo-Information | 10.3390/ijgi10090609       |
| 95 | Zhang M; Chen F; Zhao H; Wang J; Wang N                                                                  | 2021 | Recent changes of glacial lakes in the high mountain Asia and its potential controlling factors analysis                                                  | Controlling Factors; Digital Disaster Reduction; Glacial Lake; Glacier; High Mountain Asia (HMA); Shoreline Expansion | 0 | Remote Sensing                                 | 10.3390/rs13183757         |
| 96 | Adebisi N; Balogun A; Mahdianpari M; Min T                                                               | 2021 | Assessing the impacts of rising sea level on coastal morphodynamics with automated high-frequency shoreline mapping using multi-sensor optical satellites | Gee; Optical Imaging Satellites; Sea-Level Rise; Subpixel Shoreline Detection                                         | 1 | Remote Sensing                                 | 10.3390/rs13183587         |
| 97 | Anwar M; Rahman K                                                                                        | 2021 | The spatiotemporal shore morphological changes at east Bhola island in Meghna estuary of Bangladesh's central coast                                       | Bhola; Erosion; GBM; Meghna Estuary; Shoreline                                                                        | 0 | Regional Studies In Marine Science             | 10.1016/j.rsma.2021.101937 |
| 98 | Godwyn-Paulson P; Jonathan M; Roy P; Rodríguez-Espinosa P; MuthUSAnkar G; Muñoz-Sevilla N; Lakshumanan C | 2021 | Evolution of southern Mexican Pacific coastline responses to meteoceanographic and physiographic conditions                                               | Future Prediction; Landsat Imagery; Meteo-Oceanographic Impact; Mexico; Oaxaca Coast; Short/Long-Term Rate            | 0 | Regional Studies In Marine Science             | 10.1016/j.rsma.2021.101914 |

|     |                                                                                 |      |                                                                                                                                                           |                                                                                                                                                    |   |                                                        |                                |
|-----|---------------------------------------------------------------------------------|------|-----------------------------------------------------------------------------------------------------------------------------------------------------------|----------------------------------------------------------------------------------------------------------------------------------------------------|---|--------------------------------------------------------|--------------------------------|
| 99  | Natarajan L; Sivagnanam N; Usha T; Chokkalingam L; Sundar S; Gowrappan M; Roy P | 2021 | Shoreline changes over last five decades and predictions for 2030 and 2040 a case study from Cuddalore southeast coast of India                           | DSAS 5.0; Erosion and Accretion; Kalman Filter Model; Multitemporal; Prediction                                                                    | 3 | Earth Science Informatics                              | 10.1007/s12145-021-00668-5     |
| 100 | Remmache K; Bachari N; Ayache M; Khenfer K; Houma F                             | 2021 | Combination of multisource data and multiapplication models to develop a methodology as a qualitative study for beaches with very high spatial resolution | Beaches; GIS; Granulometry; Hydrodynamics; Mineralogy; Shoreline                                                                                   | 0 | Earth Systems and Environment                          | 10.1007/s41748-021-00239-0     |
| 101 | Al R A; Boluwade A                                                              | 2021 | Quantifying coastal shoreline erosion due to climatic extremes using remote sensed estimates from Sentinel-2a data                                        | Cyclone; Digital Shoreline Analysis System; Sentinel Data; Shoreline Change Envelops Coastal Erosion; Sustainable Coastal Planning and Development | 2 | Environmental Processes                                | 10.1007/s40710-021-00522-2     |
| 102 | Patel K; Jain R; Patel A; Kalubarme M                                           | 2021 | Shoreline change monitoring for coastal zone management using multitemporal Landsat data in mahi river estuary Gujarat state                              | End Point Rate (EPR); Land Erosion; Multi-Date Landsat Digital Data; NDWI; Shoreline Change; Transects                                             | 3 | Applied Geomatics                                      | 10.1007/s12518-021-00353-8     |
| 103 | Bushra N; Mostafiz R; Rohli R; Friedland C; Rahim M                             | 2021 | Technical and social approaches to study shoreline change of kuakata Bangladesh                                                                           | Bangladesh; Coastal Erosion and Accretion; GIS; Kuakata; Landsat Tm; Participatory Rural Appraisal; Remote Sensing; Shoreline Change               | 1 | Frontiers In Marine Science                            | 10.3389/fmars.2021.730984      |
| 104 | Adnan N; Rahim H; Mohd F; Maulud K                                              | 2021 | Beach profile assessment and erosion rate estimation of monsoonal coastline area in Pahang Malaysia                                                       | NA                                                                                                                                                 | 0 | IOP Conference Series: Earth and Environmental Science | 10.1088/1755-1315/799/1/012005 |

|     |                                                                 |      |                                                                                                                                                                             |                                                                                                                                    |   |                                                                   |                              |
|-----|-----------------------------------------------------------------|------|-----------------------------------------------------------------------------------------------------------------------------------------------------------------------------|------------------------------------------------------------------------------------------------------------------------------------|---|-------------------------------------------------------------------|------------------------------|
| 105 | Pratama D; Khakhim N;<br>Wicaksono A; Musthofa A;<br>Lazuardi W | 2021 | Spatiotemporal analysis of abra-<br>sion susceptibility effect on land<br>cover in the coastal area of Ban-<br>tul Regency Yogyakarta, Indone-<br>sia                       | NA                                                                                                                                 | 0 | International Jour-<br>nal of Geoinfor-<br>matics                 | 10.52939/ijg.v17i4.1961      |
| 106 | Ngowo R; Ribeiro M;<br>Pereira M                                | 2021 | Quantifying 28year 19912019<br>shoreline change trends along<br>the Mnazi Bay Ruvuma estuary<br>marine park, Tanzania                                                       | Coastal Monitoring;<br>DSAS; GIS;<br>MBREMP; Remote<br>Sensing                                                                     | 0 | Remote Sensing<br>Applications: Soci-<br>ety and Environ-<br>ment | 10.1016/j.rsase.2021.100607  |
| 107 | Bagaria P; Mitra D; Nandy<br>S; Sivakumar K                     | 2021 | Shifting shoreline of the estua-<br>rine landscape in the east Goda-<br>vari district of andhra Pradesh,<br>India                                                           | Coastal; DSAS;<br>Erosion; Estuarine;<br>Shoreline                                                                                 | 0 | Environmental<br>Earth Sciences                                   | 10.1007/s12665-021-09790-5   |
| 108 | Skilodimou H; Antoniou<br>V; Bathrellos G; Tsami E              | 2021 | Mapping of coastline changes in<br>Athens riviera over the past 76<br>years measurements                                                                                    | Artificial Coast; Cen-<br>tral Greece; GIS;<br>Remote Sensing;<br>Spatial and Temporal<br>Coastline Changes                        | 1 | Water (Switzer-<br>land)                                          | 10.3390/w13152135            |
| 109 | Smith K; Terrano J; Pitch-<br>ford J; Archer M                  | 2021 | Coastal wetland shoreline<br>change monitoring a comparison<br>of shorelines from high-resolu-<br>tion WorldView satellite im-<br>agery aerial imagery and field<br>surveys | Accretion; Coastal;<br>Erosion; Estuary;<br>Satellite Imagery;<br>Shoreline Change;<br>Wetlands                                    | 0 | Remote Sensing                                                    | 10.3390/rs13153030           |
| 110 | Mishra M; Acharyya T;<br>Kar D                                  | 2021 | Vulnerability of nesting ground<br>of Olive Ridley Turtle to severe<br>cyclonic storm Fani: A case<br>study from Rushikulya Rookery<br>east coast of India                  | Beach Fidelity; Cy-<br>clone; Digital Shore-<br>line Analysis System;<br>Olive Ridley Turtle                                       | 4 | Journal of Coastal<br>Conservation                                | 10.1007/s11852-021-00827-2   |
| 111 | Zhang X; Tan X; Hu R;<br>Zhu L; Wu C; Yang Z                    | 2021 | Using a transect-focused ap-<br>proach to interpret satellite im-<br>ages and analyze shoreline evo-<br>lution in Haiyang beach China                                       | Beach Profile Shape;<br>Beach Transect;<br>Coastal Engineering;<br>Satellite Image;<br>Shoreline Evolution;<br>Shoreline Indicator | 0 | Marine Geology                                                    | 10.1016/j.margeo.2021.106526 |

|     |                                                                   |      |                                                                                                                                                         |                                                                                                                                                                       |   |                                                        |                                 |
|-----|-------------------------------------------------------------------|------|---------------------------------------------------------------------------------------------------------------------------------------------------------|-----------------------------------------------------------------------------------------------------------------------------------------------------------------------|---|--------------------------------------------------------|---------------------------------|
| 112 | Carvalho R; Allan B; Kennedy D; Leach C; O'Brien S; Ierodiconou D | 2021 | Quantifying decadal volumetric changes along sandy beaches using improved historical aerial photographic models and contemporary data                   | Archival Aerial Photography; Historical Volumetric Change; Sandy Beaches; SFM-MVS; Shoreline Change Proxy; Surficial Sediments                                        | 1 | Earth Surface Processes and Landforms                  | 10.1002/esp.5130                |
| 113 | Daud S; Milow P; Zakaria R                                        | 2021 | Analysis of shoreline change trends and adaptation of Selangor coastline using Landsat satellite data                                                   | Accretion; Adaptive Capacity; Erosion; Selangor; Shoreline Change                                                                                                     | 1 | Journal of The Indian Society of Remote Sensing        | 10.1007/s12524-020-01218-0      |
| 114 | Shenbagaraj N; Senthil K; Rasheed A; Leostalin J; Kumar M         | 2021 | Mapping and electronic publishing of shoreline changes using UAV remote sensing and GIS                                                                 | Coastal Zone Management (CZM) and Leaflet; Digital Shoreline Analysis System (DSAS); End Point Rate (EPR); Shoreline; Shoreline Change; Unmanned Aerial Vehicle (UAV) | 1 | Journal of The Indian Society of Remote Sensing        | 10.1007/s12524-020-01287-1      |
| 115 | Elkafrawy S; Basheer M; Mohamed H; Naguib D                       | 2021 | Applications of remote sensing and GIS techniques to evaluate the effectiveness of coastal structures along Burullus headland eastern Nile delta, Egypt | Burullus Headland; DSAS; EPR; Protection Structure; Shoreline Changes; Shoreline Prediction                                                                           | 5 | Egyptian Journal of Remote Sensing and Space Science   | 10.1016/j.ejrs.2020.01.002      |
| 116 | Paravath K; Parth J; Nasar T                                      | 2021 | Geomorphologic impact of construction of breakwaters at Pon-nani fishery harbour in Kerala                                                              | NA                                                                                                                                                                    | 0 | IOP Conference Series: Earth and Environmental Science | 10.1088/1755-1315/809/1/012016  |
| 117 | Arum Y                                                            | 2021 | Analysis of shoreline changes using the bilko method on Landsat imagery in Karawang regency 1999-2019                                                   | NA                                                                                                                                                                    | 0 | Journal of Physics: Conference Series                  | 10.1088/1742-6596/1943/1/012009 |

|     |                                                                                    |      |                                                                                                                                                               |                                                                                                                                                                                    |   |                                         |                            |
|-----|------------------------------------------------------------------------------------|------|---------------------------------------------------------------------------------------------------------------------------------------------------------------|------------------------------------------------------------------------------------------------------------------------------------------------------------------------------------|---|-----------------------------------------|----------------------------|
| 118 | Kaiser S; Grosse G; Boike J; Langer M                                              | 2021 | Monitoring the transformation of Arctic landscapes automated shoreline change detection of lakes using very high resolution imagery                           | Arctic Water Bodies; Automated Monitoring; Change Detection; North Slope; Permafrost Lowlands; Shoreline Movement Direction; Shoreline Movement Rate; Very High Resolution Imagery | 0 | Remote Sensing                          | 10.3390/rs13142802         |
| 119 | Cabezas-Rabadán C; Pardo-Pascual J; Palomar-Vázquez J                              | 2021 | Characterizing the relationship between the sediment grain size and the shoreline variability defined from Sentinel-2 derived shorelines                      | Beach Morphology; Coastal Changes; Remote Sensing; Satellite Derived Shorelines; Sediment Grain Size                                                                               | 0 | Remote Sensing                          | 10.3390/rs13142829         |
| 120 | Cohen M; De S A; Liu K; Rodrigues E; Yao Q; Pessenda L; Rossetti D; Ryu J; Dietz M | 2021 | Effects of beach nourishment project on coastal geomorphology and mangrove dynamics in southern Louisiana, USA                                                | Avicennia; Delta; Drone; Satellite Images; Sea-Level Rise; Shoreline Change                                                                                                        | 3 | Remote Sensing                          | 10.3390/rs13142688         |
| 121 | Daoudi M; Niang A                                                                  | 2021 | Detection of shoreline changes along the coast of Jeddah and its impact on the geomorphological system using GIS techniques and remote sensing data 1951-2018 | Accretion; DSAS; Erosion EPR; GIS; Jeddah; LRR; Remote Sensing; Saudi Arabia; Shoreline Change                                                                                     | 1 | Arabian Journal of Geosciences          | 10.1007/s12517-021-07605-2 |
| 122 | Sohel M; Hore S; Salam M; Hoque M; Ahmed N; Rahman M; Khan H; Rahman S             | 2021 | Analysis of erosion-accretion dynamics of major rivers of worlds largest mangrove forest using geospatial techniques                                          | Accretion; Erosion; Mangrove Forest; Remote Sensing; Sundarbans                                                                                                                    | 1 | Regional Studies In Marine Science      | 10.1016/j.rsma.2021.101901 |
| 123 | Dewidar K; Bayoumi S                                                               | 2021 | Forecasting shoreline changes along the Egyptian Nile delta coast using Landsat image series and geographic information system                                | DSAS Program; Forecast; GIS; Landsat Series; Nile Delta; Shoreline Change                                                                                                          | 1 | Environmental Monitoring and Assessment | 10.1007/s10661-021-09192-x |

|     |                                                                               |      |                                                                                                                                 |                                                                                                            |    |                                                                                                                |                                              |
|-----|-------------------------------------------------------------------------------|------|---------------------------------------------------------------------------------------------------------------------------------|------------------------------------------------------------------------------------------------------------|----|----------------------------------------------------------------------------------------------------------------|----------------------------------------------|
| 124 | Wu M; Duvat V; Purkis S                                                       | 2021 | Multidecadal Atoll island dynamics in the Indian ocean Chagos Archipelago                                                       | Atoll Islands; Chagos Archipelago; Coastline Change; Hydrodynamic Modelling; Sea-Level Rise                | 1  | Global and Planetary Change                                                                                    | 10.1016/j.gloplacha.2021.103519              |
| 125 | Bengoufa S; Niculescu S; Mihoubi M; Belkessa R; Abbad K                       | 2021 | Rocky shoreline extraction using a deep learning model and object-based image analysis                                          | Convolutional Neural Network (CNN); Marine Lichen; Object-Based Image Analysis (OBIA); Shoreline Detection | 0  | International Archives of The Photogrammetry, Remote Sensing and Spatial Information Sciences - ISPRS Archives | 10.5194/isprs-archives-XLIII-B3-2021-23-2021 |
| 126 | Castelle B; Masselink G; Scott T; Stokes C; Konstantinou A; Marieu V; Bujan S | 2021 | Satellitederived shoreline detection at a high-energy mesomacrotidal beach                                                      | Long-Term Trend; Satellite; Shoreline Change; Wave Runup                                                   | 10 | Geomorphology                                                                                                  | 10.1016/j.geomorph.2021.107707               |
| 127 | Tajima Y; Wu L; Watanabe K                                                    | 2021 | Development of a shoreline detection method using an Artificial Neural Network based on satellite SAR imagery                   | Artificial Neural Network; SAR; Satellite; Shoreline Detection                                             | 0  | Remote Sensing                                                                                                 | 10.3390/rs13122254                           |
| 128 | Yang C; Gan H; Wan R; Zhang Y                                                 | 2021 | Spatiotemporal evolution and influencing factors of coastline in the Guangdonghong Kongmacao Greater Bay area from 1975 to 2018 | Geological Survey Engineering; GIS; Guangdong; Hong Kong; Macao; RS; Shoreline Change                      | 0  | Geology In China                                                                                               | 10.12029/gc20210302                          |
| 129 | Caspell M; Vasseur L                                                          | 2021 | Evaluating and visualizing drivers of coastline change: A lake Ontario case study                                               | Aerial Photography; Climate Change; Coastal Vulnerability; Coastline Change; Erosion                       | 0  | ISPRS International Journal of Geo-Information                                                                 | 10.3390/ijgi10060375                         |
| 130 | Spinosa A; Ziemba A; Saponieri A; Damiani L; El S G                           | 2021 | Remote sensing-based automatic detection of shoreline position: A case study in Apulia region                                   | Coastal Monitoring; Copernicus; Remote Sensing; SAR; Shoreline Detection                                   | 2  | Journal of Marine Science and Engineering                                                                      | 10.3390/jmse9060575                          |

|     |                                                                                               |      |                                                                                                                                        |                                                                                              |   |                                           |                               |
|-----|-----------------------------------------------------------------------------------------------|------|----------------------------------------------------------------------------------------------------------------------------------------|----------------------------------------------------------------------------------------------|---|-------------------------------------------|-------------------------------|
| 131 | Capolupo A; Monterisi C; Saponieri A; Addona F; Damiani L; Archetti R; Tarantino E            | 2021 | An interactive webGIS framework for coastal erosion risk management                                                                    | 3d Visualization Mode; Coastal Risk Assessment; Iot; Remote Sensing; Web mapping             | 0 | Journal of Marine Science and Engineering | 10.3390/jmse9060567           |
| 132 | Franklin G; Medellín G; Appendini C; Gómez J; Torres-Freyermuth A; López G J; Ruiz-Salcines P | 2021 | Impact of port development on the northern Yucatan peninsula coastline                                                                 | Beach Erosion; Beach Surveys; GPS Surveys; Port Impact; Satellite Imagery; Sea-Breezes; UAVs | 3 | Regional Studies In Marine Science        | 10.1016/j.rsma.2021.101835    |
| 133 | Toorani M; Kakroodi A; Yamani M; Naderi B A                                                   | 2021 | Monitoring shoreline shift under rapid sealevel change on the Caspian sea observed over 60 years of satellite and aerial photo records | Caspian Sea; Landsat; Rapid Sea Level Change; Shoreline Shift                                | 1 | Journal of Great Lakes Research           | 10.1016/j.jglr.2021.02.006    |
| 134 | Nourdi N; Raphael O; Grégoire A; Jean P R; Sakaros B; Thomas S; Minette T                     | 2021 | Seasonal to decadal scale shoreline changes along the Cameroonian coastline Bay of bonny 1986 to 2020                                  | Bay of Bonny; Coastline; Ecosystems; Optic; Wave Climate                                     | 1 | Regional Studies In Marine Science        | 10.1016/j.rsma.2021.101798    |
| 135 | Abualtayef M; Rabou M; Afifi S; Rabou A; Seif A; Masria A                                     | 2021 | Change detection of Gaza coastal zone using GIS and remote sensing techniques                                                          | Bathymetry Extraction; Coastal Zone; Erosion; GIS; Land Use; Remote Sensing; Shoreline       | 0 | Journal of Coastal Conservation           | 10.1007/s11852-021-00825-4    |
| 136 | Almeida L; Efraim D O I; Lyra R; Scaranto D R; Martins V; Henrique D F K A                    | 2021 | Coastal analyst system from space imagery engine CASSIE shoreline management module                                                    | Coastal Management; Google Earth Engine; Remote Sensing; Shoreline Evolution                 | 7 | Environmental Modelling and Software      | 10.1016/j.envsoft.2021.105033 |
| 137 | Masria A; Abualtayef M; Seif A                                                                | 2021 | Hydro-morphological simulation for blue beach Gaza strip Palestine                                                                     | Beach Nourishment; Blue Beach; Coastal Zone; Delft3d; Gaza; Morphological Changes            | 0 | Innovative Infrastructure Solutions       | 10.1007/s41062-021-00476-2    |
| 138 | Matin N; Hasan G                                                                              | 2021 | A quantitative analysis of shoreline changes along the coast of Bangladesh using remote sensing and GIS techniques                     | Bangladesh; Coastal Erosion-Accretion; GIS; Landsat Images; Shoreline Changes                | 5 | Catena                                    | 10.1016/j.catena.2021.105185  |

|     |                                                                     |      |                                                                                                                                                  |                                                                                                              |   |                                                                       |                                 |
|-----|---------------------------------------------------------------------|------|--------------------------------------------------------------------------------------------------------------------------------------------------|--------------------------------------------------------------------------------------------------------------|---|-----------------------------------------------------------------------|---------------------------------|
| 139 | Hu X; Wang Y; Jing W                                                | 2021 | Assessment of precision and usability of a global multiscale coastline dataset using the Pearl river estuary as a test model                     | Canny; Coastline; Fractal Dimension; GSHHG; Pearl River Estuary                                              | 0 | Tropical Geography                                                    | 10.13284/j.cnki.rddl.003351     |
| 140 | Mao Y; Yang D; Zeng A; Zhao X                                       | 2021 | Research on the change of coastline on the south coast of Hangzhou Bay based on multitemporal remote sensing images                              | NA                                                                                                           | 0 | IOP Conference Series: Earth and Environmental Science                | 10.1088/1755-1315/769/2/022024  |
| 141 | Santos C; Nascimento T; Mishra M; Silva R                           | 2021 | Analysis of long and short-term shoreline change dynamics: A study case of João Pessoa city in Brazil                                            | Coastal Accretion; Coastal Erosion; DSAS; Remote Sensing; Shoreline Changes                                  | 9 | Science of The total Environment                                      | 10.1016/j.scitotenv.2020.144889 |
| 142 | Görmüş T; Ayat B; Aydoğan B; Tătui F                                | 2021 | Basin scale spatiotemporal analysis of shoreline change in the Black sea                                                                         | Black Sea; Coastal Erosion; Landsat; Shoreline Change                                                        | 3 | Estuarine, Coastal and Shelf Science                                  | 10.1016/j.ecss.2021.107247      |
| 143 | Novikova A; Vergun A; Zelenin E; Baranskaya A; Ogorodov S           | 2021 | Determining dynamics of the Kara sea coasts using remote sensing and UAV data: A case study                                                      | Arctic Coasts; Coastal Erosion.; Kara Sea; Remote Sensing; UAVs                                              | 0 | Russian Journal of Earth Sciences                                     | 10.2205/2020ES000743            |
| 144 | De J S; Shen Y; De V J; Bijnaar G; Van M B; Augustinus P; Verweij P | 2021 | Mapping mangrove dynamics and colonization patterns at the Suriname coast using historic satellite data and the Land-Trendr algorithm            | Google Earth Engine; Historic Satellite Data; Landtrendr; Mangrove Colonization; Mangrove Patterns; Suriname | 6 | International Journal of Applied Earth Observation and Geoinformation | 10.1016/j.jag.2020.102293       |
| 145 | Dasilva M; Miot D S G; Hesp P; Bruce D; Keane R; Moore C            | 2021 | Assessing shoreline change using historical aerial and RapidEye satellite imagery Cape Jaffa south Australia                                     | Canal Estate; Coastal Erosion; Coastal Processes; Cuspate Forelands; DSAS; Marina; Salients                  | 0 | Journal of Coastal Research                                           | 10.2112/JCOASTRES-D-20-00089.1  |
| 146 | Isaie M E; Allahdadi M; Ashrafi A; Chaichitehrani N                 | 2021 | Coastal system evolution along the southeastern Caspian sea coast using satellite image analysis response to the sea level fall during 1994-2015 | Caspian Sea; Gorgan Bay; Landsat; Mi-ankaleh Spit; Sea Level Changes                                         | 0 | Arabian Journal of Geosciences                                        | 10.1007/s12517-021-07106-2      |



|     |                                                                              |      |                                                                                                                                                            |                                                                                                                                   |    |                                                        |                                     |
|-----|------------------------------------------------------------------------------|------|------------------------------------------------------------------------------------------------------------------------------------------------------------|-----------------------------------------------------------------------------------------------------------------------------------|----|--------------------------------------------------------|-------------------------------------|
| 147 | Awad M; El-Sayed H                                                           | 2021 | The analysis of shoreline change dynamics and future predictions using automated spatial techniques: case of El-Omayed on the Mediterranean coast of Egypt | Automated Shoreline Extraction; Mediterranean Coast of Egypt; Shoreline Change Dynamics; Shoreline Prediction Models; Water Index | 2  | Ocean and Coastal Management                           | 10.1016/j.ocecoaman.2021.105568     |
| 148 | Davidson S; Hesp P; Miot D S G                                               | 2021 | Rapid shoreline erosion and dunefield change Salmon Hole, South Australia                                                                                  | Coastal Erosion; DSAS; Dune Erosion; Historical Aerial Imagery; Shoreline Change                                                  | 1  | Science of The total Environment                       | 10.1016/j.scitotenv.2021.145406     |
| 149 | Wang X; Yan F; Su F                                                          | 2021 | Changes in coastline and coastal reclamation in the three most developed areas of China 1980-2018                                                          | Bohai Bay; Coastline; Ecological Risk Index; Pearl River Estuary; Yangtze River Estuary                                           | 11 | Ocean and Coastal Management                           | 10.1016/j.ocecoaman.2021.105542     |
| 150 | Khomsin K; Pratomo D; Pramudya F                                             | 2021 | Evaluation of shoreline change using multitemporal satellite images                                                                                        | NA                                                                                                                                | 1  | IOP Conference Series: Earth and Environmental Science | 10.1088/1755-1315/731/1/012006      |
| 151 | Bengoufa S; Niculescu S; Mihoubi M; Belkessa R; Rami A; Rabehi W; Abbad K    | 2021 | Machine learning and shoreline monitoring using optical satellite images: Case study of the mostaganem shoreline Algeria                                   | Erosion; GPS Survey; Machine Learning; Pleiades Image; Remote Sensing; Shoreline Monitoring                                       | 1  | Journal of Applied Remote Sensing                      | 10.1117/1.JRS.15.026509             |
| 152 | Ibarra-Marinas D; Belmonte-Serrato F; Ballesteros-Pelegrín G; García-Marín R | 2021 | Evolution of the beaches in the regional park of Salinas and Arenales of San Pedro del Pinatar southeast of Spain 1899-2019                                | Beach; Coastal Construction; Coastal Erosion; Posidoniaoceanica; Sediment Transport                                               | 1  | ISPRS International Journal of Geo-Information         | 10.3390/ijgi10040200                |
| 153 | Zi-Ru G; Gang W; Yu-Qin W; Hao C; Yu-Feng L; Hong-Yu L                       | 2021 | Impact of human activities on Yancheng coastline and coastal wetlands                                                                                      | Coastal Wetland; Coastline; Port Construction; Reclamation                                                                        | 0  | Journal of Ecology and Rural Environment               | 10.19741/j.issn.1673-4831.2020.0318 |

|     |                                                                                                 |      |                                                                                                                                                     |                                                                                                    |   |                                                        |                                |
|-----|-------------------------------------------------------------------------------------------------|------|-----------------------------------------------------------------------------------------------------------------------------------------------------|----------------------------------------------------------------------------------------------------|---|--------------------------------------------------------|--------------------------------|
| 154 | Pratikto W; Fitriadhy A; Maulana M; Huda A; Putri D; Simatupang L; Wahyudi N; Laksono R; Dewi A | 2021 | The study of coastline changing and total suspended solid distribution based on the remote sensing data in Teluk Lamong multi-purpose port terminal | NA                                                                                                 | 1 | IOP Conference Series: Earth and Environmental Science | 10.1088/1755-1315/698/1/012046 |
| 155 | Sengupta M; Ford M; Kench P                                                                     | 2021 | Shoreline changes in coral reef islands of the federated states of Micronesia since the mid-20th century                                            | Climate Change; Pacific Atolls; Reef Islands; Shoreline Change                                     | 1 | Geomorphology                                          | 10.1016/j.geomorph.2020.107584 |
| 156 | Smith S; Barnard P                                                                              | 2021 | The impacts of the 2015-2016 El Niño on California's sandy beaches                                                                                  | Coastal Hazards; El Niño; Shoreline Change; Wave Energy                                            | 3 | Geomorphology                                          | 10.1016/j.geomorph.2020.107583 |
| 157 | Safitri D; Bepalova L; Bioresita F; Nugroho R                                                   | 2021 | Land cover amendment in coastal areas of Surabaya due to coastline change based on multi-temporal satellite imagery                                 | Analytic Hierarchy Process; City Branding; Participation; Tourism                                  | 0 | Review of International Geographical Education online  | 10.48047/rigeo.11.05.154       |
| 158 | De L; Fernández-Fernández S; Espinoza J; Albuquerque M; Bernardes C                             | 2021 | End point rate tool for QGIS EPR4Q validation using DSAS and AMBUR                                                                                  | Geographic Information System (GIS); Modeling; Open-Source Software; Shoreline Evolution           | 3 | ISPRS International Journal of Geo-Information         | 10.3390/ijgi10030162           |
| 159 | Kanwal S; Ding X; Sajjad M; Nazeer M; Zia I                                                     | 2021 | Remote sensing of narrowing barrier islands along the coast of Pakistan over past 30 years                                                          | Coastal Planning and Management; DSAS; Remote Sensing; Shoreline Change Analysis; Spatial Analysis | 0 | Journal of Marine Science and Engineering              | 10.3390/jmse9030295            |
| 160 | Irham M; Suri R; Setiawan I; Fuadi A                                                            | 2021 | Spatial analysis of accretion abrasion and shoreline change in Banda Aceh coastal area                                                              | NA                                                                                                 | 0 | IOP Conference Series: Earth and Environmental Science | 10.1088/1755-1315/674/1/012046 |
| 161 | Thakare L; Shitole T                                                                            | 2021 | Vulnerability assessment of the Ratnagiri coast Maharashtra west coast of India                                                                     | Coastal Inundation; Coastal Vulnerability Index (CVI); DSAS; Sea-Level Rise Shoreline Evolution    | 1 | Journal of Coastal Research                            | 10.2112/JCOASTRES-D-19-00190.1 |

|     |                                                                                  |      |                                                                                                                                                                                              |                                                                                                  |   |                                                     |                                 |
|-----|----------------------------------------------------------------------------------|------|----------------------------------------------------------------------------------------------------------------------------------------------------------------------------------------------|--------------------------------------------------------------------------------------------------|---|-----------------------------------------------------|---------------------------------|
| 162 | Assogba B G; Maurice A D; Sintondji L; Agbossou E                                | 2021 | Analyses of short and longterm shoreline trends of the southwest Benin coast                                                                                                                 | Bouche Du Roy; DSAS; Grand-Popo Coast; Satellite Imagery; Shoreline Change                       | 0 | Journal of Coastal Research                         | 10.2112/JCOASTRES-D-20-00010.1  |
| 163 | Hossain M; Muslim A; Pour A; Mohamad M; Rabiul A S; Nadzri M; Khalil I           | 2021 | Mapping different types of shorelines from coarse-resolution imagery fuzzy classification method can deliver greater accuracy                                                                | Fuzzy C-Means; Fuzzy Maximum Likelihood; Malaysia; Remote Sensing;; South China Sea              | 0 | Journal of Coastal Research                         | 10.2112/JCOASTRES-D-20-00070.1  |
| 164 | Ferreira T; Aquino D S A; Reyes P Y; Stattegger K; Vital H                       | 2021 | Evaluation of decadal shoreline changes along the Parnaíba delta ne Brazil using satellite images and statistical methods                                                                    | Coastal Erosion; Digital Shoreline Analysis; Natural Delta; Parnaíba River Delta; Remote Sensing | 0 | Ocean and Coastal Management                        | 10.1016/j.ocecoaman.2020.105513 |
| 165 | Challenger G; Gmur S; Taylor E                                                   | 2021 | A review of Gulf of Mexico coastal marsh erosion studies following the 2010 deep-water horizon oil spill and comparison to over 4 years of shoreline loss data from Fall 2010 to Summer 2015 | Deepwater Horizon; Erosion; Gulf of Mexico; Oiling; Spartina                                     | 3 | Marine Pollution Bulletin                           | 10.1016/j.marpolbul.2021.111983 |
| 166 | Daryono L; Nakashima K; Kawasaki S; Titisari A; Barianto D; Suyanto I; Rahmadi A | 2021 | Shoreline mapping based on beach rocks identification in Krakalsadranan beach Yogyakarta Indonesia                                                                                           | Beachrocks; Geophysical Methods; Rock Properties; Shoreline Mapping; UAV Drone                   | 0 | Bulletin of Engineering Geology and The Environment | 10.1007/s10064-020-02101-5      |
| 167 | Nguyen T; Nguyen D; Truong M; Doan N                                             | 2021 | GIS-based simulation for deep-water port site selection using analytic hierarchy process: A case study from southern east of Vietnam                                                         | Location Choice; Model Builder; Natural Criteria; Weight                                         | 3 | Applied Geomatics                                   | 10.1007/s12518-020-00319-2      |
| 168 | Arulbalaji P; Banerji U; Maya K; Padmalal D                                      | 2021 | Signatures of late quaternary landsea interactions and landform dynamics along southern Kerala coast SW India                                                                                | Coastal Landforms; Land-Sea Interactions; Remote Sensing and GIS; Sea Level Changes              | 1 | Quaternary International                            | 10.1016/j.quaint.2020.05.011    |

|     |                                                                         |      |                                                                                                                                                                                                           |                                                                                                                                                        |   |                                      |                               |
|-----|-------------------------------------------------------------------------|------|-----------------------------------------------------------------------------------------------------------------------------------------------------------------------------------------------------------|--------------------------------------------------------------------------------------------------------------------------------------------------------|---|--------------------------------------|-------------------------------|
| 169 | Thakur S; Mondal I; Bar S; Nandi S; Ghosh P; Das P; De T                | 2021 | Shoreline changes and its impact on the mangrove ecosystems of some islands of Indian Sundarbans northeast coast of India                                                                                 | DSAS; Mangroves; Mann-Kendall and Sen's Slope; NDVI; Remote Sensing; Sea Level Rise; Shore-line; Sustainable Resource Management; Time Series Analysis | 8 | Journal of Cleaner Production        | 10.1016/j.jclepro.2020.124764 |
| 170 | Ren G; Zhao Y; Wang J; Wu P; Ma Y                                       | 2021 | Ecological effects analysis of Spartina Alterniflora invasion within Yellow river delta using long time series remote sensing imagery                                                                     | Coastal Wetlands; Invasive Plant; Remote Sensing; Spartina Alterniflora; Yellow River Delta                                                            | 0 | Estuarine, Coastal and Shelf Science | 10.1016/j.ecss.2020.107111    |
| 171 | Salim F; El H M; Lech-Hab K; El A                                       | 2021 | A diachronic study of the Mediterranean coastline a geometric approach                                                                                                                                    | NA                                                                                                                                                     | 0 | E3S Web of Conferences               | 10.1051/E3Sconf/202123400039  |
| 172 | Fabris M                                                                | 2021 | Monitoring the coastal changes of the Po river delta northern Italy since 1911 using archival cartography multitemporal aerial photogrammetry and Lidar data implications for coastline changes in 2100AD | Archival Multi-Temporal Data; Coastline Changes; Emerged/Submerged Surfaces; Land Subsidence; Po River Delta; Relative Sea Level Rise 2100             | 5 | Remote Sensing                       | 10.3390/rs13030529            |
| 173 | Jones L; Hobbs P                                                        | 2021 | The application of terrestrial Lidar for geohazard mapping monitoring and modelling in the British geological survey                                                                                      | Geohazards; Mapping; Modelling; Monitoring; Terrestrial LIDAR                                                                                          | 1 | Remote Sensing                       | 10.3390/rs13030395            |
| 174 | Quadrado G; Dillenburg S; Goulart E; Barboza E                          | 2021 | Historical and geological assessment of shoreline changes at an urbanized embayed sandy system in Garopaba southern Brazil                                                                                | Barrier Evolution; Coastal Management; Depositional Environments; Erosion; Multi-Temporal; Progradation                                                | 1 | Regional Studies In Marine Science   | 10.1016/j.rsma.2021.101622    |
| 175 | Arjasakusuma S; Kusuma S; Saringatin S; Wicaksono P; Mutaqin B; Rafif R | 2021 | Shoreline dynamics in east Java province Indonesia from 2000 to 2019 using multi-sensor remote sensing data                                                                                               | ALOS PALSAR; Google Earth Engine; Landsat; Maximum Entropy; Remote Sensing; Sentinel-1                                                                 | 3 | Land                                 | 10.3390/land10020100          |

|     |                                                                                |      |                                                                                                                                                                      |                                                                                                                                                                                                                             |    |                                                        |                                |
|-----|--------------------------------------------------------------------------------|------|----------------------------------------------------------------------------------------------------------------------------------------------------------------------|-----------------------------------------------------------------------------------------------------------------------------------------------------------------------------------------------------------------------------|----|--------------------------------------------------------|--------------------------------|
| 176 | Jiang J; Lohman R                                                              | 2021 | Coherence-guided InSAR deformation analysis in the presence of ongoing land surface changes in the Imperial valley California                                        | Anthropogenic Activity; Fault Creep; Geodetic Imaging; Geothermal Operation; GPS; Ground Deformation; InSAR; Lake Level Change; Land Use; Regional Tectonics; Soil Moisture; Tropospheric Noise; Uncertainty Quantification | 5  | Remote Sensing of Environment                          | 10.1016/j.rse.2020.112160      |
| 177 | Baig M; Shahfahad S; Ahmad I; Tayyab M; Asgher M; Rahman A                     | 2021 | Coastal vulnerability mapping by integrating geospatial techniques and analytical hierarchy process AHP along the Vishakhapatnam coastal tract Andhra Pradesh, India | Coastal Slope; Digital Shoreline Analysis System (DSAS); Geoinformatics; Shoreline Change Rate; Vulnerability Index                                                                                                         | 3  | Journal of The Indian Society of Remote Sensing        | 10.1007/s12524-020-01204-6     |
| 178 | Baranskaya A; Novikova A; Shabanova N; Belova N; Maznev S; Ogorodov S; Jones B | 2021 | The role of thermal denudation in erosion of Icerich permafrost coasts in an enclosed Bay Gulf of Kruzenstern western Yamal Russia                                   | Coastal Erosion; Coastal Retreat Rates; Massive Ice Beds; Permafrost; Thermal Denudation; Thermabrasion; Wave Energy                                                                                                        | 10 | Frontiers In Earth Science                             | 10.3389/feart.2020.566227      |
| 179 | Narashid R; Zakaria M; Mohd F; Pa'Suya M; Talib N; Ariffin E                   | 2021 | Effect of erosion and accretion on beach profile in Kuala Terengganu coastal areas                                                                                   | NA                                                                                                                                                                                                                          | 0  | IOP Conference Series: Earth and Environmental Science | 10.1088/1755-1315/620/1/012008 |
| 180 | Adnan N; Fadilah F; Idzhar R; Mohd F; Rasam A; Mokhtar E                       | 2021 | Geospatial analysis of coastline erosion along Pulau Tuba Langkawi                                                                                                   | NA                                                                                                                                                                                                                          | 0  | IOP Conference Series: Earth and Environmental Science | 10.1088/1755-1315/620/1/012017 |
| 181 | Bhargava R; Sarkar D; Friess D                                                 | 2021 | A cloud computing-based approach to mapping mangrove erosion and progradation: Case studies from the Sundarbans and French Guiana                                    | Coastal Accretion; Coastal Erosion; Google Earth Engine; Mangrove Loss; Water Classification                                                                                                                                | 8  | Estuarine, Coastal and Shelf Science                   | 10.1016/j.ecss.2020.106798     |

|     |                                                                                            |      |                                                                                                                                       |                                                                                                                                                                    |   |                                                                                                         |                    |
|-----|--------------------------------------------------------------------------------------------|------|---------------------------------------------------------------------------------------------------------------------------------------|--------------------------------------------------------------------------------------------------------------------------------------------------------------------|---|---------------------------------------------------------------------------------------------------------|--------------------|
| 182 | Sanchez G; Grone M; Apodaca A; Byram R; Lopez V; Jewett R                                  | 2021 | Sensing the past perspectives on collaborative archaeology and ground penetrating radar techniques from coastal California            | Amah Mutsun Tribal Band; California Archaeology; Collaborative Archaeology; Community-Based Participatory Research; Indigenous Archaeology; Indigenous Stewardship | 3 | Remote Sensing                                                                                          | 10.3390/rs13020285 |
| 183 | Bini M; CaSA Rosa N; Luppichini M                                                          | 2021 | Exploring the relationship between river discharge and coastal erosion an integrated approach applied to the Pisa coastal plain Italy | Arno River; Coastal Environmental Monitoring; Coastal Erosion; Pisa Coastal Plain; Remote Sense Monitoring                                                         | 5 | Remote Sensing                                                                                          | 10.3390/rs13020226 |
| 184 | Baranskaya A; Belova N; Bogatova D; Novikova A; Ogorodov S; Li T; Shaw T; Horton B; Khan N | 2021 | Relative sea level changes as a driver of coastal dynamics in the Russian Arctic                                                      | Arctic; Coastal Erosion; GIA; RSL; Thermal Abrasion                                                                                                                | 0 | Proceedings of The International Conference on Port and Ocean Engineering Under Arctic Conditions, POAC | NA                 |
| 185 | Ermolov A; Novikova A; Belova N                                                            | 2021 | Dynamics of low-lying accumulative coasts of western Gydan peninsula in the area of gas development                                   | Accumulative Coasts; Arctic Coastal Dynamics; Coastal Erosion; Gulf of Ob; Gydan Peninsula                                                                         | 0 | Proceedings of The International Conference on Port and Ocean Engineering Under Arctic Conditions, POAC | NA                 |

|     |                                         |      |                                                                                                                                                   |                                                                                                                                                                  |    |                                                                                                                                   |                                      |
|-----|-----------------------------------------|------|---------------------------------------------------------------------------------------------------------------------------------------------------|------------------------------------------------------------------------------------------------------------------------------------------------------------------|----|-----------------------------------------------------------------------------------------------------------------------------------|--------------------------------------|
| 186 | Wei-Hao S; Tseng S                      | 2021 | Comparisons of classification models on CoastSat                                                                                                  | Image Classification; Machine Learning; Shoreline Detection                                                                                                      | 0  | ISPACS 2021 - International Symposium on Intelligent Signal Processing and Communication Systems: 5g Dream to Reality, Proceeding | 10.1109/ISPACS51563.2021.9651114     |
| 187 | Satish A; Geetha P                      | 2021 | Assessment of shoreline change detection in Alappad region Kerala using geospatial technology                                                     | Environment For Visualizing Images; Geographic Information System; Normalized Difference Water Index; Remote Sensing Techniques; Shoreline Extraction Techniques | 0  | 2021 4th International Conference on Electrical, Computer and Communication Technologies, ICECCT 2021                             | 10.1109/ICECCT52121.2021.9616727     |
| 188 | Ahsanullah A; Khan S; Ahmed R; Luqman M | 2021 | Morphological change detection along the shoreline of karachi Pakistan using 50 year time series satellite remote sensing data and GIS techniques | Accretion and Erosion; Anthropogenic Activities; Geospatial Techniques; Karachi Coast; Shoreline Change                                                          | 0  | Geomatics, Natural Hazards and Risk                                                                                               | 10.1080/19475705.2021.2009044        |
| 189 | ParthaSARathy K; Deka P                 | 2021 | Remote sensing and GIS application in assessment of coastal vulnerability and shoreline changes: A review                                         | Coastal Vulnerability; Multi-Hazard Vulnerability; Remote Sensing; Shoreline Changes; Shoreline Prediction                                                       | 10 | Ish Journal of Hydraulic Engineering                                                                                              | 10.1080/09715010.2019.1603086        |
| 190 | Kravtsova V                             | 2021 | The possibilities of comparing for multitemporal imagery of various resolution under the northern river deltas dynamics investigation             | Changes; Coastline; Graphical Simulation; Image; Pixel                                                                                                           | 0  | Intercarto, InterGIS                                                                                                              | 10.35595/2414-9179-2021-1-27-277-291 |

|     |                                                                            |      |                                                                                                                                                                      |                                                                                                               |   |                                                                         |                                    |
|-----|----------------------------------------------------------------------------|------|----------------------------------------------------------------------------------------------------------------------------------------------------------------------|---------------------------------------------------------------------------------------------------------------|---|-------------------------------------------------------------------------|------------------------------------|
| 191 | Nath A; Koley B; SARaswati S; Bandyopadhyay K; Bhattacharya S; Chandra R B | 2021 | Evaluation of longterm shoreline changes between Rasulpur and Subarnarekha estuary east coast of India using remote sensing and GIS techniques                       | Digital Shoreline Analysis System; End Point Rate; Histogram Threshold; Linear Regression Rate; Littoral Zone | 0 | Modern Cartography Series                                               | 10.1016/B978-0-12-823895-0.00026-9 |
| 192 | Mattheus C; Braun K; Theuerkauf E; Santoro J                               | 2021 | Urban pocket-beach morphodynamics along the wave-dominated southwest coast of lake Michigan: An analysis of shoreline and sand volumetric changes                    | Beach Profile; GIS; Littoral; Overwash; Sediment Accommodation                                                | 1 | Journal of Great Lakes Research                                         | 10.1016/j.jglr.2021.10.009         |
| 193 | Mattheus C; Braun K; Theuerkauf E                                          | 2021 | Great lakes urban pocket-beach dynamics a GIS-based analysis of infrastructure design influences on geomorphic development                                           | Littoral; Sediment Accommodation; Shoreline Morphodynamics; Urban Beach; Wave Refraction                      | 0 | Journal of Great Lakes Research                                         | 10.1016/j.jglr.2021.10.020         |
| 194 | Apostolopoulos D; Nikolakopoulos K                                         | 2021 | Comparison of two opensource tools for diachronic shoreline monitoring: A case study from northwestern Peloponnese                                                   | AMBUR; DSAS; GIS; Shoreline; Statistics                                                                       | 0 | Proceedings of Spie - The International Society For Optical Engineering | 10.1117/12.2597700                 |
| 195 | Usmanov B; Gainullin I; Gafurov A; Rudenko K; Ivanov M                     | 2021 | Using multitemporal remote sensing data for evaluation of the kuibyshev reservoir bank transformation Laishevo and Ostolopovo archaeological sites Tatarstan, Russia | Archaeological Sites; Chm; DSAS; Multitemporal Remote Sensing Data; Reservoir Bank Transformation; UAV        | 0 | Proceedings of Spie - The International Society For Optical Engineering | 10.1117/12.2599931                 |
| 196 | Marfai M; Winastuti R; Wicaksono A; Mutaqin B                              | 2021 | Coastal morphodynamic analysis in Buleleng Regency Bali, Indonesia                                                                                                   | Buleleng; Grain Size; Indonesia; Morphology; Sediment Cells; Shoreline Change                                 | 0 | Natural Hazards                                                         | 10.1007/s11069-021-05088-8         |



|     |                                                                               |      |                                                                                                                                                                       |                                                                                                                                   |   |                                              |                               |
|-----|-------------------------------------------------------------------------------|------|-----------------------------------------------------------------------------------------------------------------------------------------------------------------------|-----------------------------------------------------------------------------------------------------------------------------------|---|----------------------------------------------|-------------------------------|
| 197 | Komolafe A; Apalara P; Ibitoye M; Adebola A; Olorunfemi I; Diallo I           | 2021 | Spatiotemporal analysis of shoreline positional change of Ondo state coastline using remote sensing and GIS: A case study of Ilaje coastline at Ondo state in Nigeria | Coastal Erosion; Geographic Information System; Nigeria; Remote Sensing; Shoreline Dynamics                                       | 0 | Earth Systems and Environment                | 10.1007/s41748-021-00270-1    |
| 198 | Wu Q; Yue H; Liu Y; Hou E                                                     | 2021 | Geospatial quantitative analysis of the Aral sea shoreline changes using RS and GIS techniques                                                                        | Digital Shoreline Analysis System; Geospatial Quantitative Analysis; Lake Shoreline Change; Spatial-Temporal Change; The Aral Sea | 0 | Earth Science Informatics                    | 10.1007/s12145-021-00714-2    |
| 199 | Perera T; Herath H; Piyadasa R; Jianhui L; Bing L                             | 2021 | Spatial and physicochemical assessment of groundwater quality in the urban coastal region of Sri Lanka                                                                | GIS Modelling; Hazard Quotient; Hydrochemical Facies; Potable Water; Spatial Distribution Map; Water Quality Standards; WQI       | 0 | Environmental Science and Pollution Research | 10.1007/s11356-021-16911-x    |
| 200 | Mohanty P; Shetty S; Mahendra R; Nayak R; Sharma L; Rama R E                  | 2021 | Spatiotemporal changes of mangrove cover and its impact on biocarbon flux along the West Bengal coast northeast coast of India                                        | Bio-Carbon Flux; Drought; Landsat; Mangroves; NDVI; Shoreline Change                                                              | 0 | European Journal of Remote Sensing           | 10.1080/22797254.2021.1977183 |
| 201 | El K; Bourhili A; Bagdaničičiūtė I; Minoubi A; Hakkou M; Zourarah B; Maanan M | 2021 | Coastal land use and shoreline evolution along the Nador lagoon coast in Morocco                                                                                      | Barrier Island; Coastal Erosion; Digital Shoreline Analysis System (DSAS); Human Activities; Lulc Changes; Mediterranean Coast    | 0 | Geocarto International                       | 10.1080/10106049.2021.1974958 |
| 202 | Clark A; Moorman B; Whalen D; Fraser P                                        | 2021 | Arctic coastal erosion UAV-SFM data collection strategies for planimetric and volumetric measurements                                                                 | Arctic Coastal Erosion; Coastal Retrogressive Thaw Slump; Oblique Imagery; UAV-SFM; Volumetric Coastal Erosion                    | 0 | Arctic Science                               | 10.1139/as-2020-0021          |

|     |                                               |      |                                                                                                                                                   |                                                                                                                                |   |                                                        |                               |
|-----|-----------------------------------------------|------|---------------------------------------------------------------------------------------------------------------------------------------------------|--------------------------------------------------------------------------------------------------------------------------------|---|--------------------------------------------------------|-------------------------------|
| 203 | Mishra M; Kar D; Debnath M; Sahu N; Goswami S | 2021 | Rapid eco-physical impact assessment of tropical cyclones using geospatial technology: A case from severe cyclonic storms Amphan                  | Amphan; Coastal Management; Geo-spatial Technology; Super Cyclone; Tropical Cyclone                                            | 1 | Natural Hazards                                        | 10.1007/s11069-021-05008-w    |
| 204 | Bhattacharya R; Das C N                       | 2021 | Sand mining consequences on channel morphology practical use of digital shoreline analysis system DSAS geometrical indices and compound factor CF | Channel Incision; Geomorphic Response (Gr); Pool-Riffle Alteration; Riverine Land Covers (RLCS) Change; Structural Knick Point | 0 | Environmental Science and Engineering                  | 10.1007/978-3-030-72296-8_6   |
| 205 | Jabir A; Hasan G; Anam M                      | 2021 | Correlation between temperature sea level rise and land loss an assessment along the Sundarbans coast                                             | Coastal Erosion; Landsat Images; Sea Level Rise; Sundarbans; Temperature Variation; Tide Levels                                | 0 | Journal of King Saud University - Engineering Sciences | 10.1016/j.jksues.2021.07.012  |
| 206 | Koulibaly C; Ayoade J                         | 2021 | The application of GIS and remote sensing in a spatiotemporal analysis of coastline retreat in Rufisque, Senegal                                  | Accretion; Adaptation; Coastline; Erosion; Rufisque; Spatiotemporal Change                                                     | 0 | Geomatics and Environmental Engineering                | 10.7494/geom.2021.15.3.55     |
| 207 | Jodhani K; Bansal P; Jain P                   | 2021 | Shoreline change and rate analysis of Gulf of Khambhat using satellite images                                                                     | ArcGIS; DSAS; Remote Sensing; Shoreline Changes                                                                                | 0 | Lecture Notes In Civil Engineering                     | 10.1007/978-981-16-1303-6_12  |
| 208 | Kapusta J; Petrovič F; Hreško J; Rączkowska Z | 2021 | Shrinkage of the tarns in the high Tatras Slovakia, Poland                                                                                        | Basin Filling; High Tatras; Lake Shrinkage; Morphodynamic Processes; Retrospective Analysis; Shoreline Changes; Tarns          | 0 | Geographia Cassoviensis                                | 10.33542/GC2021-1-01          |
| 209 | Khallaghi S; Pontius J                        | 2021 | Area method compared with transect method to measure shoreline movement                                                                           | AMBUR; Boundary Movement; Coastal Studies; DSAS; GIS; Shoreline Change                                                         | 0 | Geocarto International                                 | 10.1080/10106049.2021.1926556 |

|     |                                                               |      |                                                                                                                                                                                                                                                                                        |                                                                                                                                          |   |                                                                                   |                               |
|-----|---------------------------------------------------------------|------|----------------------------------------------------------------------------------------------------------------------------------------------------------------------------------------------------------------------------------------------------------------------------------------|------------------------------------------------------------------------------------------------------------------------------------------|---|-----------------------------------------------------------------------------------|-------------------------------|
| 210 | Boumboulis V; Apostolopoulos D; Depountis N; Nikolakopoulos K | 2021 | The importance of geotechnical evaluation and shoreline evolution in coastal vulnerability index calculations                                                                                                                                                                          | Coastal Erosion; Coastal Vulnerability Index (CVI); Geographical Information Systems (GIS); Geotechnical Evaluation; Shoreline Evolution | 3 | Journal of Marine Science and Engineering                                         | 10.3390/jmse9040423           |
| 211 | Blais M; Akhloufi M                                           | 2021 | Deep learning for low altitude coastline segmentation                                                                                                                                                                                                                                  | Aerial Images; Coastal Erosion; Coastline Detection; Deep Learning; Remote Sensing; Semantic Segmentation                                | 0 | Proceedings of Spie - The International Society For Optical Engineering           | 10.1117/12.2586977            |
| 212 | Pujianiki N; Widhi G; Antara I; Temaja I; Osawa T             | 2021 | Monitoring coastline changes using Landsat application in Batu Mejan beach                                                                                                                                                                                                             | Accretion; Coastline Changes; Erosion; Landsat                                                                                           | 0 | International Journal on Advanced Science, Engineering and Information Technology | 10.18517/ijaseit.11.2.13162   |
| 213 | Lezine E; Kyzivat E; Smith L                                  | 2021 | Super-resolution surface water mapping on the Canadian shield using planet CUBESAT images and a generative adversarial network cartographie des eaux de surface à très haute résolution sur le bouclier canadien à l'aide d'images planet cubesat et d'un réseau antagoniste génératif | NA                                                                                                                                       | 0 | Canadian Journal of Remote Sensing                                                | 10.1080/07038992.2021.1924646 |
| 214 | Thanh T; Quang C N; Xuan T D                                  | 2021 | Sandspit evolution and inlet dynamics derived from satellite images: A case study for Tien Chau inlet Vietnam                                                                                                                                                                          | Fishing Harbor; Sand-Spit; Satellite Images; Shoreline Detection; Tien Chau Vietnam                                                      | 0 | Lecture Notes In Civil Engineering                                                | 10.1007/978-981-16-0053-1_36  |

|     |                                                                                          |      |                                                                                                                                                                                                                                |                                                                                                                                       |   |                                         |                                 |
|-----|------------------------------------------------------------------------------------------|------|--------------------------------------------------------------------------------------------------------------------------------------------------------------------------------------------------------------------------------|---------------------------------------------------------------------------------------------------------------------------------------|---|-----------------------------------------|---------------------------------|
| 215 | Baía L; Ranieri L; Rosário R                                                             | 2021 | Multitemporal analysis of variations in the coastlines of stuarine macrotidal beaches in the eastern Amazon, Brazil análise multitemporal da variação da linha de costa em praias estuarinas de macromaré na Amazônia oriental | Beach; Eastern Amazon; Erosion and Coastal Accretion; Remotes sensing                                                                 | 0 | Geociencias                             | 10.5016/geociencias.v40i1.13470 |
| 216 | NasSAR K; El-Adawy A; Zakaria M; Diab R; Masria A                                        | 2021 | Quantitative appraisal of naturalanthropic shoreline shifts for Hurghada, Egypt                                                                                                                                                | DSAS; Hurghada; Red Sea; Remote Sensing; Shoreline Prediction                                                                         | 0 | Marine Georesources and Geotechnology   | 10.1080/1064119X.2021.1918807   |
| 217 | Septiangga B; Mutaqin B                                                                  | 2021 | Spatio-temporal analysis of wulan delta in Indonesia characteristics evolution and controlling factors                                                                                                                         | Coastal; Histogram Thresholding; Indonesia; Morphodynamics; Wulan Delta                                                               | 2 | Geographia Technica                     | 10.21163/GT_2021.163.04         |
| 218 | Dimiyati M; Trihatmoko E; Marfai M                                                       | 2021 | 10 years erosion-sedimentation monitoring system based automatic interpretation in coastal area of Brebes Cegency Central Java Province, Indonesia                                                                             | Band Ratio; Brebes Indonesia; Coastal Dynamics; Erosion-Sedimentation Process; GIS                                                    | 1 | Geographia Technica                     | 10.21163/GT_2021.161.03         |
| 219 | Rogers M; Bithell M; Brooks S; Spencer T                                                 | 2021 | Vedge-detector automated coastal vegetation edge detection using a Convolutional Neural Network                                                                                                                                | NA                                                                                                                                    | 0 | International Journal of Remote Sensing | 10.1080/01431161.2021.1897185   |
| 220 | Mishra M; Acharyya T; Chand P; Santos C; Kar D; Das P; Pattnaik N; Silva R; Nascimento T | 2021 | Analyzing shoreline dynamicity and the associated socioecological risk along the southern Odisha coast of India using remote sensing-based and statistical approaches                                                          | Digital Shoreline Analysis System (DSAS); Endpoint Rate (EPR); Remote Sensing; Shoreline Dynamicity; Weighted Linear Regression (WLR) | 9 | Geocarto International                  | 10.1080/10106049.2021.1882005   |
| 221 | Islam M; Uddin A; Hossain P                                                              | 2021 | Assessing the dynamics of land cover and shoreline changes of Nijhum Dwip island of Bangladesh using remote sensing and GIS techniques                                                                                         | Bangladesh; GIS; Land Cover; Nijhum Dwip; Remote Sensing; Shoreline                                                                   | 5 | Regional Studies In Marine Science      | 10.1016/j.rsma.2020.101578      |

|      |                                                                  |      |                                                                                                                                                                                   |                                                                                                                  |   |                                                   |                               |
|------|------------------------------------------------------------------|------|-----------------------------------------------------------------------------------------------------------------------------------------------------------------------------------|------------------------------------------------------------------------------------------------------------------|---|---------------------------------------------------|-------------------------------|
| 222  | Yadav A; Dodamani B; Dwarakish G                                 | 2021 | Effect of disturbed river sediment supply on shoreline configuration: A case study                                                                                                | Accretion; DSAS; Erosion; Shoreline; Swat; ArcGIS                                                                | 1 | Ish Journal of Hydraulic Engineering              | 10.1080/09715010.2021.1878068 |
| 223  | Liu W; Chen X; Ran J; Liu L; Wang Q; Xin L; Li G                 | 2021 | Laenet a novel lightweight multi-task CNN for automatically extracting lake area and shoreline from remote sensing images                                                         | Lake Area Segmentation; Lake Shoreline Extraction; Lightweight CNN; Spatial Gradient Map                         | 4 | Remote Sensing                                    | 10.3390/rs13010056            |
| 224  | Hasan M; Karmaker S; Rahman M                                    | 2021 | Geomorphological change assessment of south western coastal region: A case study of Mongla, Upazila, Bagerhat Bangladesh                                                          | Coastal Region; Erosion; Geomorphological Changes; GIS and RS; NDWI; Shoreline                                   | 0 | Journal of Applied Water Engineering and Research | 10.1080/23249676.2020.1831977 |
| 225  | Vu M; Lacroix Y; Vu Q                                            | 2021 | Assessment of the shoreline evolution at the eastern Giens Tombolo of France                                                                                                      | Erosion and Accretion; Giens Tombolo; GIS; Satellite Images; Shoreline Prediction                                | 0 | Lecture Notes In Civil Engineering                | 10.1007/978-3-030-60269-7_18  |
| 226  | Crawford T; Rahman M; Miah M; Islam M; Paul B; Curtis S; Islam M | 2021 | Coupled adaptive cycles of shoreline change and households in deltaic Bangladesh analysis of a 30year shoreline change record and recent population impacts                       | Adaptive Cycle; Erosion/Accretion; Household Survey; Remote Sensing; Spatio-temporal Analysis                    | 1 | Annals of The American Association of Geographers | 10.1080/24694452.2020.1799746 |
| 227  | Yadav A; Dodamani B; Dwarakish G                                 | 2021 | Shoreline analysis using Landsat-8 satellite image                                                                                                                                | ArcGIS; EPR and LRR; Erdas Imagine; Landsat-8; Shoreline Change                                                  | 4 | Ish Journal of Hydraulic Engineering              | 10.1080/09715010.2018.1556569 |
| 1458 | Escudero M; Reguero B; Mendoza E; Secaira F; Silva R             | 2021 | Coral reef geometry and hydrodynamics in beach erosion control in north Quintana Roo, Mexico                                                                                      | Beach Erosion Mitigation; Coral Reefs; Coastal Protection; Radiation Stress; Wave Energy; Nature-Based Solutions | 1 | Frontiers In Marine Science                       | 10.3389/fmars.2021.684732     |
| 1462 | Bagyaraj M; Venkatesan S; Preethi T; Infantina S; Rajmohan S     | 2021 | The analysis of long-term shoreline changes due to erosion and accretion using multiresolution Landsat satellite data along the coast between Chennai to Kovalam Tamilnadu, India | Shoreline Change; Erosion; Accretion; GIS Studies; Chennai; Kovalam                                              | 0 | Journal of Indian Geophysical Union               | NA                            |

|      |                                                    |      |                                                                                                                                                                    |                                                                                                                |   |                                    |                                 |
|------|----------------------------------------------------|------|--------------------------------------------------------------------------------------------------------------------------------------------------------------------|----------------------------------------------------------------------------------------------------------------|---|------------------------------------|---------------------------------|
| 1491 | Lezine E; Kyzivat E; Smith L                       | 2021 | Super-resolution surface water mapping on the Canadian shield using planet cubesat images and a generative adversarial network                                     | NA                                                                                                             | 0 | Canadian Journal of Remote Sensing | 10.1080/07038992.2021.1924646   |
| 1494 | Santos C; Do N T; Mishra M; Da S R                 | 2021 | Analysis of long and short-term shoreline change dynamics: A study case of Joao Pessoa city in Brazil                                                              | Shoreline Changes; DSAS; Remote Sensing; Coastal Erosion; Coastal Accretion                                    | 8 | Science of The total Environment   | 10.1016/j.scitotenv.2020.144889 |
| 1508 | Smith S; Barnard P                                 | 2021 | The impacts of the 2015-2016 El Nino on California's sandy beaches                                                                                                 | El Nino; Shoreline Change; Wave Energy; Coastal Hazards                                                        | 3 | Geomorphology                      | 10.1016/j.geomorph.2020.107583  |
| 1511 | Ferreira T; Da S A; Perez Y; Stattegger K; Vital H | 2021 | Evaluation of decadal shoreline changes along the Parnaiba delta ne Brazil using satellite images and statistical methods                                          | Remote Sensing; Parnaiba River Delta; Digital Shoreline Analysis; Coastal Erosion; Natural Delta               | 0 | Ocean & Coastal Management         | 10.1016/j.ocecoaman.2020.105513 |
| 1525 | Loi D; Khac D; Hung D; Dong N; Vinh D; Weber C     | 2021 | Monitoring of coastline change using sentinel-2A and Landsat-8 data: A case study of Pam Pha city, Quang Ninh province                                             | Coastline Change; Sentinel-2a; Landsat 8; Normalized Difference Water Index                                    | 0 | Vietnam Journal of Earth Sciences  | 10.15625/2615-9783/16066        |
| 1528 | Dingil M; Oztekin M                                | 2021 | Detecting the shoreline change pattern over 72 years in the Mediterranean using aerial photos and satellite images: A case study in Mersin, Turkey                 | Shoreline Change; Remote Sensing; Digitizing; QGIS; Georeference; Aerial Photo                                 | 0 | Fresenius Environmental Bulletin   | NA                              |
| 2    | Sanhory A; El-Tahan M; Moghazy H; Reda W           | 2022 | Natural and manmade impact on Rosetta eastern shoreline using satellite image processing technique                                                                 | (LITPACK); DSAS; Ghalyon Fish Farm; MNDWI; Remote Sensing; Rosetta Promontory                                  | 0 | Alexandria Engineering Journal     | 10.1016/j.aej.2021.11.053       |
| 3    | Queiroz H; Gonçalves R; Mishra M                   | 2022 | Characterizing global satellitebased indicators for coastal vulnerability to erosion management as exemplified by a regional level analysis from north-east Brazil | Coastal Vulnerability Index; Coastal Vulnerability to Erosion; Global Indicator; Pca; Remotely Sensed Data Set | 0 | Science of The total Environment   | 10.1016/j.scitotenv.2021.152849 |

|    |                                                           |      |                                                                                                                                          |                                                                                                                                          |   |                                                              |                                  |
|----|-----------------------------------------------------------|------|------------------------------------------------------------------------------------------------------------------------------------------|------------------------------------------------------------------------------------------------------------------------------------------|---|--------------------------------------------------------------|----------------------------------|
| 4  | Cowley D; Harris D; Moss P; Shulmeister J                 | 2022 | Beach narrowing on prograding coasts examples from the tropics to subtropics of eastern Australia                                        | Aerial Photography; Beach Width; Digital Shoreline Analysis System; Queensland; Shoreline Change; Southwest Pacific; Subtropics; Tropics | 0 | Geomorphology                                                | 10.1016/j.geomorph.2022.108110   |
| 5  | Sadio M; Sakho I; Samou S M; Gueye A; Diouf M; Deloffre J | 2022 | Multidecadal dynamics of the Saloum river delta mouth in climate change context                                                          | Climate Change; Coastal Erosion; Saloum River Delta; Sandy Spit; Senegal; Tidal Inlet                                                    | 0 | Journal of African Earth Sciences                            | 10.1016/j.jafrearsci.2022.104451 |
| 6  | Akay S; Özcan O; Balık Ş F                                | 2022 | Quantification and visualization of flood-induced morphological changes in meander structures by UAV-based monitoring                    | Multi-Temporal Surveys; Natural Hazard; River Morphology; Unmanned Aerial Vehicles (UAV)                                                 | 0 | Engineering Science and Technology, An International Journal | 10.1016/j.jestch.2021.05.020     |
| 7  | Nanson R; Bishop-Taylor R; Sagar S; Lymburner L           | 2022 | Geomorphic insights into Australia's coastal change using a national dataset derived from the multidecadal Landsat archive               | Coastal Barrier; Coastal Erosion; Coastal Management; DEA Coastlines; Ramsar Wetlands; Sea Level Rise                                    | 0 | Estuarine, Coastal and Shelf Science                         | 10.1016/j.ecss.2021.107712       |
| 8  | Elfadaly A; Abutaleb K; Naguib D; Lasaponara R            | 2022 | Detecting the environmental risk on the archaeological sites using satellite imagery in Basilicata region Italy                          | Cultural Heritage Sites; Flood Monitoring; Google Earth Engine Platform; SAR (C-Band) Data                                               | 0 | Egyptian Journal of Remote Sensing and Space Science         | 10.1016/j.ejrs.2022.01.007       |
| 9  | Wang J; Li D; Cao W; Lou X; Shi A; Zhang H                | 2022 | Remote sensing analysis of erosion in Arctic coastal areas of Alaska and Eastern Siberia                                                 | Arctic; Coastal Erosion; Coastal Zone; Remote Sensing Analysis                                                                           | 0 | Remote Sensing                                               | 10.3390/rs14030589               |
| 10 | Daramola S; Li H; Otoo E; Idowu T; Gong Z                 | 2022 | Coastal evolution assessment and prediction using remotely sensed front vegetation line along the Nigerian transgressive Mahin Mud coast | Coastal Erosion; Coastline Prediction; Managed Realignment; Mangroves; Nigerian Coastline                                                | 0 | Regional Studies In Marine Science                           | 10.1016/j.rsma.2022.102167       |

|    |                                                                              |      |                                                                                                                                                                                                                                           |                                                                                       |   |                                                |                                  |
|----|------------------------------------------------------------------------------|------|-------------------------------------------------------------------------------------------------------------------------------------------------------------------------------------------------------------------------------------------|---------------------------------------------------------------------------------------|---|------------------------------------------------|----------------------------------|
| 11 | Abdelhady H; Troy C; Habib A; Manish R                                       | 2022 | A simple fully automated shoreline detection algorithm for high-resolution multi-spectral imagery                                                                                                                                         | LIDAR; Shoreline Detection; Shoreline Evolution; Shoreline Timeseries; Water Index    | 0 | Remote Sensing                                 | 10.3390/rs14030557               |
| 12 | Nicolae L A; Castelle B; Marieu V; Robinet A; Bul-teau T; Bernon N; Mallet C | 2022 | Decadal beach-dune profile monitoring along a 230km high-energy sandy coast Aquitaine southwest France                                                                                                                                    | Beach Profile; Coastal Dune; Erosion; Long-Term Trend; Recovery; Regional Variability | 0 | Applied Geography                              | 10.1016/j.apgeog.2022.102645     |
| 13 | Jose P P C; Onguene R; Abessolo G; Ele P                                     | 2022 | Morphology impact of the dike of the autonomous port of Kribi on the Cameroonian coast                                                                                                                                                    | Coastal Morphology; Deep Port of Kribi; DSAS; Impact of Dikes                         | 0 | Journal of African Earth Sciences              | 10.1016/j.jafrearsci.2021.104439 |
| 14 | Hu X; Wang Y                                                                 | 2022 | Monitoring coastline variations in the Pearl river estuary from 1978 to 2018 by integrating Canny Edge Detection and OTSU methods using long time series Landsat dataset                                                                  | Canny Edge Detection; Coastline; DSAS; Landsat; The Pearl River Estuary               | 0 | Catena                                         | 10.1016/j.catena.2021.105840     |
| 15 | Dietz M; Liu K; Bianchette T; Ryu J; Yao Q                                   | 2022 | Linking backbarrier lacustrine stratigraphy with spatial dynamics of shoreline retreat in a rapidly subsiding region of the Mississippi river delta                                                                                       | Environmental Change; Mississippi Delta; Shoreline Retreat                            | 0 | Geomorphology                                  | 10.1016/j.geomorph.2021.108008   |
| 16 | De F A D M; Amaro V; Scudelari A; Rosado S                                   | 2022 | Estimation of long term shoreline changes along the eastern coast of Rio grande do norte state northeast Brazil estimativas das alterações de longo prazo na linha de praia do litoral oriental do Rio Grande do norte nordeste do Brasil | Climate Change; Coastal Erosion; Coastal Management                                   | 0 | Revista Brasileira De Geomorfologia            | 10.20502/RBG.V23I1.1953          |
| 17 | Aoudj C; Guerfi M; Mezouar K                                                 | 2022 | Evolution of shoreline kinematics at the Bejaia Bay east Algeria from 1989 to 2017                                                                                                                                                        | Coastal Kinematics; Coastline of Bejaia; DSAS; Erosion; GIS                           | 0 | Advances In Science, Technology and Innovation | 10.1007/978-3-030-72547-1_15     |



|    |                                                    |      |                                                                                                                                 |                                                                                                                         |   |                                                |                              |
|----|----------------------------------------------------|------|---------------------------------------------------------------------------------------------------------------------------------|-------------------------------------------------------------------------------------------------------------------------|---|------------------------------------------------|------------------------------|
| 18 | Dobrică G; Cerneagă C; Maftei C                    | 2022 | Shoreline change analysis using digital shoreline analysis system along southeast Romanian coast                                | Erosion; GIS; Remote Sensing; Romanian Littoral; Shoreline Change                                                       | 0 | Advances In Science, Technology and Innovation | 10.1007/978-3-030-72547-1_18 |
| 19 | Psomiadis E                                        | 2022 | Long and short-term coastal changes assessment using earth observation data and GIS analysis: The case of Sperchios river delta | Change Detection; Coastal Geomorphology; GIS; Qualitative and Quantitative Analysis; Remote Sensing                     | 0 | ISPRS International Journal of Geo-Information | 10.3390/ijgi11010061         |
| 20 | Panda G; Mishra M; Chatterjee U                    | 2022 | Risk assessment of coastal erosion for Odisha coast along Bay of Bengal India using coastal hazard wheel model                  | Biophysical Parameters; Coastal Erosion; Coastal Hazard Wheel; Coastal Zone Management; Geographical Information System | 0 | Geojournal                                     | 10.1007/s10708-021-10552-w   |
| 21 | Mahamoud A; Gzam M; Ahmed M N; Soulé H; Montacer M | 2022 | A preliminary assessment of coastal vulnerability for Ngazidja Island Comoros Archipelago western Indian ocean                  | Beach; Coastal Vulnerability Index (CVI); Ngazidja Island; Sea-Level Rise; Steep Cliff                                  | 0 | Environmental Earth Sciences                   | 10.1007/s12665-021-10136-4   |
| 22 | Arriaga J; Medellin G; Ojeda E; Salles P           | 2022 | Shoreline detection accuracy from video monitoring systems                                                                      | Accuracy Assessment; Camera Calibration; Image Stabilization; Video Monitoring                                          | 0 | Journal of Marine Science and Engineering      | 10.3390/jmse10010095         |
| 23 | Kang Y; He J; Wang B; Lei J; Wang Z; Ding X        | 2022 | Geomorphic evolution of radial sand ridges in the south Yellow sea observed from satellites                                     | Morphological Evolution; Radial Sand Ridges; Remote Sensing; Sand Ridge Lines; Waterline                                | 0 | Remote Sensing                                 | 10.3390/rs14020287           |
| 24 | Gazi M; Maksud K A; Uddin M; Bhuiyan M; Rahman M   | 2022 | The stability and suitability of the Bhasan Char island as an accommodation for the forcibly displaced Myanmar nationals FDMN   | Bangladesh; Bhasan Char; DSAS; Geospatial Techniques; Island Dynamics; Seismic; Shoreline Shifting                      | 0 | Sustainability (Switzerland)                   | 10.3390/su14020747           |

|    |                                                              |      |                                                                                                                                                |                                                                                                  |   |                                                |                                |
|----|--------------------------------------------------------------|------|------------------------------------------------------------------------------------------------------------------------------------------------|--------------------------------------------------------------------------------------------------|---|------------------------------------------------|--------------------------------|
| 25 | Wu Q; Miao S; Huang H; Guo M; Zhang L; Yang L; Zhou C        | 2022 | Quantitative analysis on coastline changes of Yangtze river delta based on high spatial resolution remote sensing images                       | Coastline Changing; GFL; NDWI; Remote Sensing; Yangtze River Delta; ZY-3                         | 0 | Remote Sensing                                 | 10.3390/rs14020310             |
| 26 | Williams H; Rains B                                          | 2022 | Effect of barrier height on magnitude and character of hurricane harvey washover fans Matagorda Peninsula Texas, USA                           | Deposition; Erosion; LIDAR; MaRSh; Overwash                                                      | 0 | Journal of Coastal Research                    | 10.2112/JCOASTRES-D-21-00043.1 |
| 27 | Gómez-Pazo A; Payo A; Paz-Delgado M; Delgadillo-Calzadilla M | 2022 | Open Digital Shoreline Analysis System ODSAS v10                                                                                               | Cliffmetrics; Coastal Variation; Coastcr; DSAS; ODSAS; Profile crossings; R; SAGA                | 0 | Journal of Marine Science and Engineering      | 10.3390/jmse10010026           |
| 28 | Valjarević A                                                 | 2022 | GIS-based methods for the analysis of the main ports in Europe                                                                                 | Digital Cartography; Geographical Information Systems; Marine Traffic; Numerical Analysis; Ports | 0 | Lecture Notes In Civil Engineering             | 10.1007/978-981-16-7735-9_59   |
| 29 | Alcaras E; Falchi U; Parente C; Vallario A                   | 2022 | Accuracy evaluation for coastline extraction from pléiades imagery based on NDWI and IHS Pansharpening application                             | Accuracy Evaluation; Coastline Extraction; NDWI; Pléiades Images; Remote Sensing; VHR            | 0 | Applied Geomatics                              | 10.1007/s12518-021-00411-1     |
| 30 | Zonkouan B; Bachri I; Beda A; N'Guessan K                    | 2022 | Monitoring spatial and temporal scales of shoreline changes in lahoukpanda (southern ivory coast) using Landsat data series (TM, ETM+ and OLI) | DSAS; Lahou-Kpanda; Landsat; Remote Sensing; Shoreline Change                                    | 0 | Geomatics and Environmental Engineering        | 10.7494/geom.2022.16.1.145     |
| 31 | Mou F; Bhuiyan N; Alvee F; Rahman A; Maliha M                | 2022 | Estimation of erosion-accretion using remote sensing approach: A case analysis on Teknaf coastline                                             | ARCGIS; Coastline; Cyclone; Erosion-Accretion                                                    | 0 | Lecture Notes In Civil Engineering             | 10.1007/978-981-16-5547-0_39   |
| 32 | Zhang Y; Qiao Q; Liu J; Sang H; Yang D; Zhai L; Li N; Yuan X | 2022 | Coastline changes in mainland China from 2000 to 2015                                                                                          | Accuracy Evaluation; Automatic Extraction; Coastline; Mainland China; Stability                  | 0 | International Journal of Image and Data Fusion | 10.1080/19479832.2021.1943011  |

|    |                                     |      |                                                                                       |                                                                                               |   |                                                    |                   |
|----|-------------------------------------|------|---------------------------------------------------------------------------------------|-----------------------------------------------------------------------------------------------|---|----------------------------------------------------|-------------------|
| 33 | Polk M; Gittman R; Smith C; Eulie D | 2022 | Coastal resilience surges as living shorelines reduce lateral erosion of salt marshes | Coastal Protection; Hurricane Florence; Living Shorelines; Nature-Based; Shoreline Management | 1 | Integrated Environmental Assessment and Management | 10.1002/ieam.4447 |
|----|-------------------------------------|------|---------------------------------------------------------------------------------------|-----------------------------------------------------------------------------------------------|---|----------------------------------------------------|-------------------|
