# Supplementary material
Source: MDPI journal article supplement (https://www.mdpi.com/2071-1050/14/9/4895)
Supplement: s1 [file s1]

**Table S3.** Summary of scientific publications with direct citation of data sources (methods) and tools for shoreline change analysis and detection (1968-2022)

| Studies | Location    | Aim                                                                                                                                                 | Data sources (Methods)                                                                     | Tools Used                                                                                           | Finding                                                                                                                                   | Research Gaps                                             | Colour cluster<br>(See Figure 7) |
|---------|-------------|-----------------------------------------------------------------------------------------------------------------------------------------------------|--------------------------------------------------------------------------------------------|------------------------------------------------------------------------------------------------------|-------------------------------------------------------------------------------------------------------------------------------------------|-----------------------------------------------------------|----------------------------------|
| [28]    | Italy       | To evaluate UAV photogrammetric and GNSS techniques to investigate coastal zone morphological changes due to both natural and anthropogenic factors | LiDAR data, Digital Terrain Models (DTMs), orthophotos, UAV (Remote sensing, field survey) | Multiple (Agisoft Metashape Professional Edition 1.5.5, Agisoft LLC, RTKLIB v. 2.4.3 software, QGIS) | Low cost, professional, and commercial UAVs are good tools to produce maps and detect topographical changes                               | Shoreline mapping techniques and accuracy                 | Light brown                      |
| [43]    | Italy       | To find a rapid way of identifying the instantaneous shoreline                                                                                      | WorldView-2 (Remote sensing)                                                               | Multiple (ERDAS, K-means and ISO-DATA, Active Connections Matrix systems (ACM))                      | The detection of greater accuracy in the Active Connections Matrix (ACM) algorithms for testing satellite images for shoreline extraction | Reliable methods and data sources for shoreline mapping   | Purple                           |
| [44]    | South Korea | To propose a new methodology for measuring coastline recession                                                                                      | Corona image (Buffering and non-linear least square)                                       | Model- non-linear least square                                                                       | The buffering and non-linear least square method is more reliable than other methods                                                      | Reliable methodologies for estimating coastline recession | Pink                             |
| [45]    | Tuvalu      | To examine the shoreline change of twenty-eight islands in Funafuti Atoll, Tuvalu,                                                                  | Multiple-QuickBird-2, WorldView-2, WorldView-3, Landsat (Remote sensing)                   | Multiple (CLASlite                                                                                   | A decrease (0.13%) in net island area                                                                                                     | The understanding of island geological                    | Light green                      |

between 2005 and 2015 using fine spatial resolution satellite imagery, and explores the feasibility of estimating island area with no-cost moderate spatial resolution imagery

software, Terrset-IDRISI)

adjustments to sea-level rise

|      |           |                                                                                                     |                                                             |                                      |                                                                                                                    |                                                                                                                     |      |
|------|-----------|-----------------------------------------------------------------------------------------------------|-------------------------------------------------------------|--------------------------------------|--------------------------------------------------------------------------------------------------------------------|---------------------------------------------------------------------------------------------------------------------|------|
| [66] | Finland   | To locate shoreline changes in the Porttipahta Finland water reservoir                              | Landsat (Remote sensing)                                    | Computer aided analysis              | The importance of using digital Landsat data to generate information about environmental changes in reservoir area | The need for more information on Landsat data classification possibilities for future environmental changes studies | Blue |
| [67] | Australia | To evaluate temporal and spatial bias in the estimation of shoreline rate of change statistics      | Beach surveys records (Field survey)                        | Model-Least square technique         | Variations in the trends of short term beach surveys (5year records)                                               | Stability and accuracy of the estimates of shoreline rate-of-change                                                 | Blue |
| [68] | Taiwan    | To detect shorelines changes for tideland areas                                                     | Satellite- SPOT images, tidal measurements (Remote sensing) | Model-Triangulated Irregular Network | Error of the test sand barriers ranges between 7.6% and 12.5%                                                      | Approaches in detecting shoreline changes                                                                           | Blue |
| [69] | Brazil    | To investigate the influence of Climatic Variations on River Delta Hydrodynamics and Morphodynamics | Multiple- Landsat, field survey (Remote sensing, GIS)       | ArcGIS                               | Most shoreline changes occurring westwards of the delta mouth                                                      | Research on river deltaic systems                                                                                   | Blue |

|      |           |                                                                                                                                                                                   |                                                                              |                         |                                                                                                            |                                                                                                           |       |
|------|-----------|-----------------------------------------------------------------------------------------------------------------------------------------------------------------------------------|------------------------------------------------------------------------------|-------------------------|------------------------------------------------------------------------------------------------------------|-----------------------------------------------------------------------------------------------------------|-------|
| [70] | Brazil    | To evaluate sedimentary balance and morphological changes                                                                                                                         | RapidEye images (Remote sensing, GIS)                                        | DSAS                    | Significant transformation of the natural landscape by anthropic activities                                | Port terminal and local shoreline change                                                                  | Blue  |
| [71] | Australia | To quantify the relative influence of SAM, SOI, PDO, and STR variability during both negative and positive IPO phases on shoreline dynamics along the southeast Queensland coast. | Landsat (Remote sensing, GIS)                                                | DSAS                    | A bimodal climate control on shoreline is dependent on phase of the Interdecadal Pacific Oscillation (IPO) | Shorelines response to future climate extremes                                                            | Blue  |
| [72] | Egypt     | To analyse the pattern of shoreline changes (beach erosion) in the northwestern Nile delta                                                                                        | Multiple Landsat, aerial photograph (Remote sensing)                         | IDRISI                  | The detection of long-shore designs of beach erosion and accretion                                         | The need for the study of rates of shoreline changes and transport direction to develop predictive models | Red   |
| [73] | Canada    | To analyse the spatial and temporal variability of shoreline change in the Beaufort-Mackenzie region of Canada                                                                    | Multiple-Aerial photographs, GPS survey (A soft-copy photogrammetric system) | GRASS                   | The dominance of shoreline retreat with mean annual retreat rate of -0.6m/yr                               | Exploration of hydrocarbons and coastal change                                                            | Brown |
| [74] | U.S.A     | To quantify shoreline change and coastal erosion rates                                                                                                                            | Aerial photograph (GIS)                                                      | Multiple (ArcMap, DSAS) | Annual average erosion rates of 5.6m/yr from 1955 to 2002                                                  | Historical site and infrastructure lost prediction from modern erosion rates measurement                  | Brown |

|      |        |                                                                                                                                                                             |                                                                 |                                  |                                                                                                                                              |                                                                                                                                                                                                            |       |
|------|--------|-----------------------------------------------------------------------------------------------------------------------------------------------------------------------------|-----------------------------------------------------------------|----------------------------------|----------------------------------------------------------------------------------------------------------------------------------------------|------------------------------------------------------------------------------------------------------------------------------------------------------------------------------------------------------------|-------|
| [75] | Spain  | To achieve a better understanding of artificial embayed beach morphodynamics using shoreline position and beach area data from three beaches in Barcelona City              | Argus video system, dGPS survey (Field survey)                  | Intertidal Beach Mapper software | A general retreating trend with displacements of the shorelines which resulted from the oblique wave incidence during strong storm phenomena | Parameters involved in the determination of beach rotation                                                                                                                                                 | Green |
| [76] | France | To develop a methodology based on the baseline approach for measuring the coastline retreat/advance around Hardelot-Plage and Sainte Ce'cile-Plage, in the north of France. | Multiple- Aerial photo- graphs, GPS surveys (GIS, field survey) | Multiple (ArcGIS, DSAS)          | The identification of retreat (82%) in shorelines between 1947 and 2005                                                                      | Methodologies for measuring coastline retreat/advance                                                                                                                                                      | Pink  |
| [77] | France | To analyse variations in the position of the coastline and variations in sediment volumes in the coastal dunes and on the beach                                             | LiDAR data (Remote sensing)                                     | Surfer® software                 | Significant declines in shorelines                                                                                                           | The determination of the variations in the sediment balance in the littoral zone of Nord-Pas de Calais and a precise knowledge of coastal sediment stocks and their role in the stability of the coastline | Pink  |

|      |         |                                                                                                                                      |                                                                                                                                               |                                                                                |                                                                                                                                                           |                                                                                                                                      |             |
|------|---------|--------------------------------------------------------------------------------------------------------------------------------------|-----------------------------------------------------------------------------------------------------------------------------------------------|--------------------------------------------------------------------------------|-----------------------------------------------------------------------------------------------------------------------------------------------------------|--------------------------------------------------------------------------------------------------------------------------------------|-------------|
| [78] | France  | To examine the formation of a large embryonic dune field                                                                             | Multiple- Aerial photo-graphs, topographical maps, LiDAR data, field survey (Field survey)                                                    | Golden Software Surfer™                                                        | The advancement of the sea towards the coast since the 16th century                                                                                       | The morphology of incipient/ embryonic fore-dunes                                                                                    | Pink        |
| [79] | China   | To analyse the characteristics of coastline changes in mainland China                                                                | Multiple- Topographic maps, Landsat, GPS survey (Remote sensing, GIS, field survey)                                                           | ArcGIS                                                                         | The dramatic change in the coastline structure of mainland China because of coastline artificialization caused by sea reclamation and coastal engineering | The need for urgent integrated management, effective environment protection and sustainable utilization of coastlines                | Light blue  |
| [80] | Poland  | To describe an application of a low-cost tailless fixed-wing UAV for inland lake shoreline                                           | Multiple- UAV, geodetic total station, RTK/GNSS survey, hydroacoustic soundings, aerial mapping (Remote sensing, GIS, field survey)           | ArcGIS                                                                         | Low cost UAV is an excellent tool for estimating shallow changes in lake shorelines                                                                       | Reliable UAV systems for coastal water environment research                                                                          | Purple      |
| [86] | Poland  | To evaluate the use of the data in the creation of electronic databases of navigational maps                                         | Multiple- sonar and photogrammetric images, UAV, orthophotos, GNSS-RTK (Remote sensing, GIS, field survey)                                    | Multiple (ArcGIS/ArcMap, DSAS, Pix4D software)                                 | Best results obtained from the product of the UAV flight                                                                                                  | Shoreline mapping accuracy and problems                                                                                              | Purple      |
| [87] | Armenia | To examine the possibilities, specific features, and applications of UAV-based environmental monitoring of Lake Sevan's coastal zone | Multiple- Landsat, web-services Yandex.Maps, Google Maps, BingMaps, ArcGIS.Imagery, UAV-aerial photograph (Remote sensing, GIS, field survey) | Multiple(ArcGIS, SAGA (System of Automated Geoscientific Analyses), algorithm- | Areas and objects at risk of flooding under the projected water level rise to 1903.5 m along the west coasts of Minor Sevan                               | UAV surveys as a necessary intermediary between ground data and satellite imagery with different spatial resolutions for the complex | Light brown |

|      |          |                                                                                                                                                                                                                                               |                                                                                   |                                                                                         |                                                                                                                                                                                                                               |  |  |                                                                                                                                                        |                                                                     |  |
|------|----------|-----------------------------------------------------------------------------------------------------------------------------------------------------------------------------------------------------------------------------------------------|-----------------------------------------------------------------------------------|-----------------------------------------------------------------------------------------|-------------------------------------------------------------------------------------------------------------------------------------------------------------------------------------------------------------------------------|--|--|--------------------------------------------------------------------------------------------------------------------------------------------------------|---------------------------------------------------------------------|--|
|      |          |                                                                                                                                                                                                                                               |                                                                                   |                                                                                         | Support Vector<br>Machine (SVM)                                                                                                                                                                                               |  |  |                                                                                                                                                        | environmental monitor-<br>ing of the coastal area and<br>water body |  |
| [91] | Malaysia | To utilize the Canny edge de-<br>tection algorithm with<br><br>velocity bunching model to<br>simulate the rate change of<br><br>shoreline from historical multi-<br>SAR data (ERS-1 and<br><br>RADARSAT-1 SAR data)                           | Multiple- SAR- ERS-1, RA-<br>DARSAT-1, in situ measure-<br>ments (Remote sensing) | Multiple (Algo-<br>rithm-Canny, ve-<br>locity bunching<br>model- Kappa sta-<br>tistic)  | Shoreline change rate<br>modelled from the<br><br>quasi-linear wave spectra<br>model has a significant re-<br>lationship with one mod-<br>elled from historical<br><br>vector layers of aerial<br>photography and SAR<br>data |  |  | SAR utilization for shore-<br>line change modelling                                                                                                    | Red                                                                 |  |
| [92] | Mexico   | To investigate the relation be-<br>tween shoreline change, reefs’<br>geometry and hydrodynamic<br>parameters to elucidate the<br>physics related to how the Mes-<br>oamerican Reef in Mexico pro-<br>tects sandy coastlines from ero-<br>sion | Google Earth Pro imagery,<br>satellite images (Remote<br>sensing, GIS)            | Multiple<br>(ArcMap, Models-<br>Wave Propagation<br>model, WA-<br>VEWATCH-III<br>model) | Reefs with shallow crests<br>and wide flats provide<br>the most remarkable effi-<br>cacy in preventing beach<br>erosion                                                                                                       |  |  | Insights for reef restora-<br>tion projects focused on<br>erosion<br><br>mitigation and designing<br>artificial reefs in mi-<br>crotidal sandy beaches | Green                                                               |  |
